# Supplementary material for: Characterization of particle-associated and free-living bacterial and archaeal communities along the water columns of the South China Sea
Source: Copernicus journal article supplement (doi:10.5194/bg-18-113-2021), 2021-01-08
Supplement: Supplementary file 1 [file bg-18-113-2021-supplement.zip]

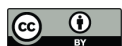

## *Supplement of*

# **Characterization of particle-associated and free-living bacterial and archaeal communities along the water columns of the South China Sea**

**Jiangtao Li et al.**

*Correspondence to:* Jiasong Fang (jfang@hpu.edu)

- bg-18-113-2021-supplement-title-page.pdf
- 03 Supplementary\_Figures.docx
- 03 Supplementary\_Table S1.xlsx
- 03 Supplementary\_Table S2.xlsx
- 03 Supplementary\_Table S3.xlsx

The copyright of individual parts of the supplement might differ from the CC BY 4.0 License.
