# Supplementary material for: Characterization of particle-associated and free-living bacterial and archaeal communities along the water columns of the South China Sea
Source: Copernicus journal article supplement (doi:10.5194/bg-18-113-2021), 2021-01-08
Supplement: Supplementary file 2 [file bg-18-113-2021-supplement.zip]

Archive with 5 entries (5 files):
- bg-18-113-2021-supplement-title-page.pdf
- 03 Supplementary_Table S3.xlsx
- 03 Supplementary_Table S2.xlsx
- 03 Supplementary_Figures.docx
- 03 Supplementary_Table S1.xlsx
