# Supplementary material for: Characterization of particle-associated and free-living bacterial and archaeal communities along the water columns of the South China Sea
Source: Copernicus journal article supplement (doi:10.5194/bg-18-113-2021), 2021-01-08
Supplement: Supplementary file 2 [file bg-18-113-2021-supplement.zip › 03 Supplementary_Table S1.xlsx]

## Sheet: Bacterial 16S rRNA Annotation
OTUId	Domain	Phylum	Class	Order	Family	Genus	Species	G3F50	G3F200	G3F1000	G3F2000	G3F3000	G3F4000	G3P50	G3P200	G3P1000	G3P2000	G3P3000	G3P4000	J5F50	J5F200	J5F1000	J5F2000	J5F3000	J5F4000	J5P50	J5P200	J5P1000	J5P3000	J5P4000	J5P2000
OTU_1	Bacteria	Proteobacteria	Alphaproteobacteria	Rhizobiales	Beijerinckiaceae	Methylobacterium	uncultured bacterium	282	64	143	137	330	155	3	575	1966	766	496	1329	28	27	212	696	428	162	2257	1296	2568	1554	2432	0
OTU_10	Bacteria	Proteobacteria	Gammaproteobacteria	Alteromonadales	Alteromonadaceae	Alteromonas	Alteromonas australica	22	4	37	1760	57	70	15	58	1207	5617	3512	540	0	59	16	234	164	27	34	2681	3450	1366	279	3
OTU_100	Bacteria	Proteobacteria	Gammaproteobacteria	Salinisphaerales	Solimonadaceae	Polycyclovorans	uncultured Sinobacteraceae bacterium	2	0	0	0	0	0	10	1	0	0	0	0	0	0	0	0	0	0	215	0	2	0	1	0
OTU_1001	Bacteria	Proteobacteria	Gammaproteobacteria	Cellvibrionales	Spongiibacteraceae	Spongiibacter	Spongiibacter tropicus DSM 19543	0	20	0	0	0	0	0	0	3	0	0	0	0	0	0	0	0	0	0	0	0	0	0	0
OTU_1002	Bacteria	Nitrospinae	Nitrospinia	Nitrospinales	Nitrospinaceae	Nitrospina	uncultured bacterium	0	2	0	0	0	0	0	0	0	0	0	0	0	4	0	0	0	0	0	0	0	0	0	0
OTU_1004	Bacteria	Proteobacteria	Gammaproteobacteria	Oceanospirillales	Pseudohongiellaceae	Pseudohongiella	marine metagenome	0	0	0	0	0	0	0	0	0	0	0	0	0	4	0	0	0	0	0	0	0	0	0	0
OTU_1005	Bacteria	Proteobacteria	Gammaproteobacteria	Gammaproteobacteria Incertae Sedis	Unknown Family	uncultured	Unclassified	0	0	0	0	0	0	0	0	0	0	0	0	0	0	0	0	0	0	0	1	8	0	4	0
OTU_1006	Bacteria	Proteobacteria	Gammaproteobacteria	Betaproteobacteriales	Neisseriaceae	Neisseria	uncultured bacterium	0	0	0	0	0	0	0	5	0	3	0	3	0	0	0	0	0	0	7	0	2	2	0	0
OTU_1008	Bacteria	Proteobacteria	Gammaproteobacteria	Cellvibrionales	Halieaceae	Haliea	Haliea salexigens DSM 19537	0	0	0	0	0	0	0	0	0	0	0	5	0	0	0	0	0	0	0	0	7	0	0	0
OTU_1009	Bacteria	Actinobacteria	Actinobacteria	Micrococcales	Intrasporangiaceae	Ornithinimicrobium	Ornithinimicrobium sp. EF2C-B618	0	0	0	0	0	0	0	0	0	0	0	0	0	0	0	0	0	0	24	0	0	0	0	0
OTU_1010	Bacteria	Proteobacteria	Deltaproteobacteria	Bdellovibrionales	Bdellovibrionaceae	OM27 clade	uncultured bacterium	0	0	0	0	0	0	0	0	0	0	0	0	0	0	0	0	0	0	0	0	0	4	2	0
OTU_1011	Bacteria	Planctomycetes	Planctomycetacia	Planctomycetales	uncultured	uncultured bacterium HF0500_40D21	uncultured bacterium HF0500_40D21	0	0	15	0	3	5	0	0	0	1	0	1	0	0	9	7	3	4	0	0	0	8	0	0
OTU_1012	Bacteria	Patescibacteria	Gracilibacteria	Candidatus Peregrinibacteria	uncultured bacterium	uncultured bacterium	uncultured bacterium	3	0	0	0	0	0	2	0	0	0	0	0	7	0	0	0	0	0	0	0	0	0	0	0
OTU_1013	Bacteria	Proteobacteria	Alphaproteobacteria	Rickettsiales	Rickettsiaceae	uncultured	uncultured bacterium	0	0	0	0	0	6	0	0	0	0	0	0	0	0	0	0	0	0	0	0	0	0	0	0
OTU_1014	Bacteria	Verrucomicrobia	Verrucomicrobiae	Opitutales	Puniceicoccaceae	MB11C04 marine group	uncultured marine microorganism	0	4	0	0	0	0	0	0	0	0	0	0	0	0	0	0	0	0	0	0	0	0	0	0
OTU_1015	Bacteria	Chloroflexi	Dehalococcoidia	SAR202 clade	uncultured deep-sea bacterium	uncultured deep-sea bacterium	uncultured deep-sea bacterium	0	0	9	0	0	0	0	0	0	0	0	0	0	0	1	0	0	0	0	0	0	0	0	0
OTU_1016	Bacteria	Actinobacteria	Actinobacteria	Frankiales	Geodermatophilaceae	Blastococcus	uncultured bacterium	0	0	0	0	0	0	0	0	0	0	0	0	0	0	0	0	0	0	0	0	0	6	0	0
OTU_1017	Bacteria	Cyanobacteria	Oxyphotobacteria	Unclassified	Unclassified	Unclassified	Unclassified	0	0	0	0	0	0	0	0	0	0	0	0	0	0	0	0	0	0	11	0	0	0	0	0
OTU_1018	Bacteria	Verrucomicrobia	Verrucomicrobiae	Opitutales	Puniceicoccaceae	Coraliomargarita	uncultured bacterium	0	0	1	0	0	0	0	0	0	0	0	0	1	0	0	0	0	0	4	0	0	0	4	0
OTU_1019	Bacteria	Proteobacteria	Gammaproteobacteria	Alteromonadales	Pseudoalteromonadaceae	Pseudoalteromonas	Unclassified	0	0	0	0	0	0	0	0	0	0	9	0	0	0	0	0	0	0	0	0	0	0	0	0
OTU_102	Bacteria	Planctomycetes	Planctomycetacia	Pirellulales	Pirellulaceae	uncultured	uncultured marine microorganism	0	47	34	24	29	36	0	0	1	0	0	2	0	14	39	60	43	12	0	3	0	0	6	0
OTU_1020	Bacteria	Bacteroidetes	Bacteroidia	Flavobacteriales	Flavobacteriaceae	Winogradskyella	uncultured bacterium	1	0	1	1	1	0	0	0	3	0	0	0	0	0	2	0	0	0	14	5	0	0	0	1
OTU_1021	Bacteria	Actinobacteria	Actinobacteria	Micrococcales	Microbacteriaceae	Microbacterium	Microbacterium sp. ZJ6315	0	0	0	0	0	0	0	0	2	0	0	4	0	0	0	0	0	3	0	9	5	0	0	0
OTU_1022	Bacteria	Marinimicrobia (SAR406 clade)	uncultured bacterium 405006-B04	uncultured bacterium 405006-B04	uncultured bacterium 405006-B04	uncultured bacterium 405006-B04	uncultured bacterium 405006-B04	0	0	0	0	0	0	0	0	0	0	0	0	4	0	0	0	0	0	0	0	0	0	0	0
OTU_1023	Bacteria	Chloroflexi	Dehalococcoidia	SAR202 clade	uncultured sediment bacterium	uncultured sediment bacterium	uncultured sediment bacterium	0	1	0	1	0	0	0	0	0	0	0	0	0	5	10	0	0	0	0	0	0	0	0	0
OTU_1024	Bacteria	Gemmatimonadetes	BD2-11 terrestrial group	uncultured bacterium	uncultured bacterium	uncultured bacterium	uncultured bacterium	0	1	26	0	10	12	0	0	3	0	0	0	0	0	27	11	12	13	0	0	3	0	0	0
OTU_1025	Bacteria	Proteobacteria	Gammaproteobacteria	Betaproteobacteriales	Burkholderiaceae	Diaphorobacter	Acidovorax sp. JS42	0	0	0	0	0	0	0	0	0	0	0	0	0	0	0	0	0	0	0	0	6	0	0	0
OTU_1026	Bacteria	Planctomycetes	Planctomycetacia	Pirellulales	Pirellulaceae	Bythopirellula	uncultured bacterium	0	1	2	0	1	0	0	0	0	0	0	0	0	2	0	0	0	0	0	0	0	0	0	0
OTU_1027	Bacteria	Proteobacteria	Alphaproteobacteria	Rhizobiales	Hyphomicrobiaceae	uncultured	uncultured bacterium	0	0	2	0	0	1	0	0	1	0	0	0	0	1	0	0	0	0	0	4	0	0	0	0
OTU_1028	Bacteria	Proteobacteria	Deltaproteobacteria	Bdellovibrionales	Bacteriovoracaceae	Peredibacter	Unclassified	0	0	0	0	1	4	0	0	0	0	0	0	0	0	3	0	0	2	0	2	0	0	0	0
OTU_1029	Bacteria	Planctomycetes	Phycisphaerae	Phycisphaerales	Phycisphaeraceae	uncultured	uncultured bacterium	0	0	2	0	0	0	0	0	0	0	0	0	0	0	1	0	0	0	0	0	8	0	0	0
OTU_103	Bacteria	Proteobacteria	Gammaproteobacteria	UBA10353 marine group	uncultured bacterium KM3-174-C5	uncultured bacterium KM3-174-C5	uncultured bacterium KM3-174-C5	0	151	166	1	1	6	0	3	11	0	0	0	0	60	142	2	2	3	0	8	5	0	0	0
OTU_1030	Bacteria	Chloroflexi	Anaerolineae	Anaerolineales	Anaerolineaceae	uncultured	marine metagenome	0	41	0	0	0	0	0	0	0	0	0	0	0	12	0	0	0	0	0	0	0	0	0	0
OTU_1031	Bacteria	Proteobacteria	Alphaproteobacteria	Rhodospirillales	Magnetospiraceae	uncultured	uncultured alpha proteobacterium	0	0	3	0	8	11	0	0	0	0	3	0	0	0	2	1	4	12	0	0	1	10	3	0
OTU_1032	Bacteria	Proteobacteria	Deltaproteobacteria	SAR324 clade(Marine group B)	Unclassified	Unclassified	Unclassified	0	0	0	0	0	0	0	0	6	0	0	0	0	0	0	0	0	0	0	1	0	0	0	0
OTU_1033	Bacteria	Actinobacteria	Acidimicrobiia	Unclassified	Unclassified	Unclassified	Unclassified	0	0	0	0	0	0	0	0	0	0	0	0	6	0	0	0	0	0	0	0	0	0	0	0
OTU_1034	Bacteria	Actinobacteria	Actinobacteria	Corynebacteriales	Nocardiaceae	Gordonia	uncultured bacterium	0	0	0	5	0	0	0	0	0	3	0	5	0	0	0	5	0	0	0	0	15	0	3	0
OTU_1035	Bacteria	Proteobacteria	Deltaproteobacteria	Bdellovibrionales	Bdellovibrionaceae	OM27 clade	uncultured bacterium	0	0	0	0	0	0	0	0	0	0	0	0	0	0	2	0	0	0	0	9	1	0	0	0
OTU_1036	Bacteria	Gemmatimonadetes	Gemmatimonadetes	Gemmatimonadales	Gemmatimonadaceae	uncultured	uncultured bacterium	0	0	0	0	0	0	0	0	0	5	0	0	0	0	0	0	0	0	0	0	0	0	0	0
OTU_1037	Bacteria	Proteobacteria	Gammaproteobacteria	Betaproteobacteriales	Rhodocyclaceae	Dechlorosoma	bacterium str. 51885	0	0	0	0	0	0	0	0	0	0	0	0	0	0	0	0	0	0	0	0	0	19	1	0
OTU_1038	Bacteria	Firmicutes	Clostridia	Clostridiales	Family XI	Anaerococcus	uncultured bacterium	0	0	0	0	0	0	0	0	0	0	0	0	0	0	0	0	5	0	0	0	1	0	0	0
OTU_1039	Bacteria	Proteobacteria	Alphaproteobacteria	Rhizobiales	Devosiaceae	Pelagibacterium	Unclassified	0	12	0	0	0	0	3	1	0	0	0	0	8	0	0	0	0	0	58	0	0	0	2	0
OTU_104	Bacteria	Proteobacteria	Alphaproteobacteria	Sphingomonadales	Sphingomonadaceae	Unclassified	Unclassified	0	0	8	0	2	0	1	0	4	0	0	0	7	0	5	1	0	0	8	38	2	0	3	0
OTU_1040	Bacteria	Planctomycetes	Planctomycetacia	Pirellulales	Pirellulaceae	Rhodopirellula	uncultured bacterium	0	5	6	0	2	6	0	2	0	0	0	0	0	4	5	2	0	9	0	0	2	0	2	0
OTU_1041	Bacteria	Bacteroidetes	Bacteroidia	Flavobacteriales	NS9 marine group	uncultured marine bacterium	uncultured marine bacterium	0	1	0	0	0	0	0	0	5	0	0	0	0	2	1	1	0	0	0	0	0	0	0	0
OTU_1042	Bacteria	Firmicutes	Clostridia	Clostridiales	Family XI	Anaerococcus	uncultured bacterium	0	0	0	0	0	0	0	0	0	0	0	0	0	0	0	0	11	0	0	0	0	0	0	0
OTU_1043	Bacteria	Actinobacteria	Actinobacteria	Actinomycetales	Actinomycetaceae	Actinomyces	uncultured bacterium	0	0	0	0	5	0	0	0	0	0	0	0	0	0	0	0	0	0	0	0	0	0	2	0
OTU_1044	Bacteria	PAUC34f	Unclassified	Unclassified	Unclassified	Unclassified	Unclassified	0	0	0	0	0	8	0	0	0	0	0	0	0	0	0	0	0	1	0	0	0	0	0	0
OTU_1045	Bacteria	Proteobacteria	Gammaproteobacteria	Coxiellales	Coxiellaceae	Coxiella	Unclassified	0	0	0	0	0	0	0	0	0	0	0	0	0	0	0	0	1	0	6	0	0	0	0	0
OTU_1046	Bacteria	Proteobacteria	Deltaproteobacteria	Bradymonadales	uncultured marine bacterium	uncultured marine bacterium	uncultured marine bacterium	0	0	0	0	0	0	0	0	0	0	0	0	0	0	0	0	0	0	0	0	0	0	4	0
OTU_1047	Bacteria	Marinimicrobia (SAR406 clade)	marine metagenome	marine metagenome	marine metagenome	marine metagenome	marine metagenome	4	0	0	0	0	0	0	0	0	0	0	0	0	0	0	0	0	0	0	0	0	0	0	0
OTU_1048	Bacteria	Proteobacteria	Gammaproteobacteria	Methylococcales	Methylomonaceae	Milano-WF1B-03	uncultured bacterium	0	0	5	0	0	11	0	0	0	0	0	0	0	0	0	0	0	0	0	0	0	0	0	0
OTU_1049	Bacteria	Kiritimatiellaeota	Kiritimatiellae	Kiritimatiellales	Kiritimatiellaceae	R76-B128	marine metagenome	9	0	0	0	0	0	2	0	2	0	0	0	0	0	0	0	0	0	1	0	0	0	0	0
OTU_105	Bacteria	Proteobacteria	Alphaproteobacteria	Rhodobacterales	Rhodobacteraceae	Unclassified	Unclassified	0	0	0	0	3	2	0	0	0	0	9	2	0	0	3	28	3	0	0	0	14	13	9	0
OTU_1050	Bacteria	Margulisbacteria	metagenome	metagenome	metagenome	metagenome	metagenome	5	0	0	0	0	0	0	0	0	0	0	0	0	0	0	0	0	0	0	0	0	0	0	0
OTU_1051	Bacteria	Proteobacteria	Deltaproteobacteria	Bradymonadales	unidentified marine bacterioplankton	unidentified marine bacterioplankton	unidentified marine bacterioplankton	0	0	1	1	0	9	0	0	0	0	0	0	0	0	0	0	0	0	0	0	0	0	0	0
OTU_1053	Bacteria	Proteobacteria	Alphaproteobacteria	Rhodospirillales	Magnetospiraceae	Magnetospira	uncultured alpha proteobacterium	0	2	0	0	0	0	0	0	4	0	0	0	0	6	0	0	0	0	0	0	0	0	0	0
OTU_1054	Bacteria	Schekmanbacteria	Unclassified	Unclassified	Unclassified	Unclassified	Unclassified	0	0	4	0	0	1	0	0	33	0	0	0	0	2	14	0	2	2	0	0	0	0	0	0
OTU_1055	Bacteria	Marinimicrobia (SAR406 clade)	Marinimicrobia bacterium SCGC AAA003-E22	Marinimicrobia bacterium SCGC AAA003-E22	Marinimicrobia bacterium SCGC AAA003-E22	Marinimicrobia bacterium SCGC AAA003-E22	Marinimicrobia bacterium SCGC AAA003-E22	0	1	2	0	0	6	0	0	1	0	0	0	0	6	1	3	0	0	0	0	0	0	0	0
OTU_1056	Bacteria	Proteobacteria	Gammaproteobacteria	Pseudomonadales	Pseudomonadaceae	Pseudomonas	Pseudomonas balearica DSM 6083	0	0	0	2	8	3	0	0	0	1	0	0	0	0	0	0	0	0	0	0	9	0	0	0
OTU_1057	Bacteria	Marinimicrobia (SAR406 clade)	uncultured bacterium	uncultured bacterium	uncultured bacterium	uncultured bacterium	uncultured bacterium	0	20	7	0	3	3	0	2	0	0	0	0	0	12	18	1	0	8	0	0	0	0	0	0
OTU_1058	Bacteria	Acidobacteria	Acidobacteriia	Solibacterales	Solibacteraceae (Subgroup 3)	PAUC26f	uncultured bacterium	0	0	0	1	2	1	0	0	0	0	0	0	0	0	0	0	0	1	0	0	0	0	0	0
OTU_1059	Bacteria	Marinimicrobia (SAR406 clade)	Marinimicrobia bacterium SCGC AAA003-E22	Marinimicrobia bacterium SCGC AAA003-E22	Marinimicrobia bacterium SCGC AAA003-E22	Marinimicrobia bacterium SCGC AAA003-E22	Marinimicrobia bacterium SCGC AAA003-E22	0	0	0	0	0	0	0	0	0	0	0	0	0	6	1	0	0	0	0	0	0	0	0	0
OTU_106	Bacteria	Proteobacteria	Alphaproteobacteria	SAR11 clade	Clade IV	uncultured bacterium	uncultured bacterium	157	0	2	0	0	0	2	0	4	0	0	0	1	2	0	0	1	0	1	1	0	0	1	0
OTU_1060	Bacteria	Proteobacteria	Deltaproteobacteria	Bdellovibrionales	Bacteriovoracaceae	Peredibacter	uncultured bacterium	1	0	0	1	0	0	0	0	0	0	0	0	0	3	0	0	0	0	0	10	0	0	0	0
OTU_1061	Bacteria	Proteobacteria	Gammaproteobacteria	Coxiellales	Coxiellaceae	Coxiella	uncultured gamma proteobacterium	0	0	0	0	0	0	0	0	0	0	0	0	0	0	0	1	1	0	0	0	0	4	0	0
OTU_1062	Bacteria	Proteobacteria	Deltaproteobacteria	Desulfarculales	Desulfarculaceae	uncultured	uncultured bacterium	0	0	0	0	0	0	0	0	0	0	0	0	0	0	0	0	0	0	8	0	0	0	3	0
OTU_1063	Bacteria	Proteobacteria	Deltaproteobacteria	Oligoflexales	Oligoflexaceae	uncultured bacterium	uncultured bacterium	0	0	0	0	0	0	0	0	0	0	0	0	0	0	0	0	0	0	1	0	0	7	6	0
OTU_1064	Bacteria	Chloroflexi	Dehalococcoidia	SAR202 clade	Unclassified	Unclassified	Unclassified	0	0	2	0	3	2	0	0	0	0	0	0	0	0	0	0	1	12	0	0	0	0	0	0
OTU_1066	Bacteria	Actinobacteria	Actinobacteria	Actinomycetales	Actinomycetaceae	Actinomyces	Actinomyces viscosus	0	0	0	0	0	0	0	0	0	0	0	0	0	0	0	1	0	0	7	0	0	0	2	0
OTU_1067	Bacteria	Planctomycetes	Phycisphaerae	Phycisphaerales	Phycisphaeraceae	Urania-1B-19 marine sediment group	Unclassified	0	0	3	0	0	0	0	0	0	0	0	0	0	0	0	0	0	1	0	0	0	0	0	0
OTU_1068	Bacteria	Proteobacteria	Alphaproteobacteria	Holosporales	Holosporaceae	uncultured	uncultured alpha proteobacterium	0	4	0	0	0	0	0	0	0	0	0	0	0	0	0	0	0	0	0	0	0	0	0	0
OTU_1069	Bacteria	Bacteroidetes	Bacteroidia	Bacteroidales	Dysgonomonadaceae	Dysgonomonas	uncultured bacterium	0	0	0	0	0	0	0	0	0	0	0	0	0	0	0	0	0	0	0	6	0	0	3	0
OTU_107	Bacteria	Proteobacteria	Alphaproteobacteria	Rickettsiales	uncultured bacterium	uncultured bacterium	uncultured bacterium	0	32	22	0	6	2	0	0	8	0	0	0	0	9	36	0	1	15	0	0	0	0	2	0
OTU_1070	Bacteria	Proteobacteria	Gammaproteobacteria	Vibrionales	Vibrionaceae	Photobacterium	uncultured bacterium	0	0	0	0	0	0	1	0	0	0	0	0	0	0	0	0	0	0	0	1	5	0	0	0
OTU_1071	Bacteria	Marinimicrobia (SAR406 clade)	Unclassified	Unclassified	Unclassified	Unclassified	Unclassified	14	0	0	0	0	0	0	0	1	0	0	0	1	0	0	0	0	0	0	0	0	0	3	0
OTU_1074	Bacteria	Cyanobacteria	Oxyphotobacteria	Unclassified	Unclassified	Unclassified	Unclassified	0	0	0	0	2	0	0	2	0	0	0	0	0	0	0	0	0	0	0	0	0	0	0	0
OTU_1075	Bacteria	Actinobacteria	Actinobacteria	Micrococcales	Micrococcaceae	Kocuria	Kocuria palustris	0	3	0	0	1	0	0	0	4	4	0	0	0	0	1	2	0	0	0	0	5	0	0	0
OTU_1076	Bacteria	Proteobacteria	Alphaproteobacteria	Rickettsiales	Rickettsiaceae	Candidatus Cryptoprodotis	uncultured bacterium	0	0	0	0	0	0	0	0	3	0	0	0	0	0	0	0	0	0	3	0	0	0	0	0
OTU_1077	Bacteria	Marinimicrobia (SAR406 clade)	uncultured bacterium	uncultured bacterium	uncultured bacterium	uncultured bacterium	uncultured bacterium	30	0	1	0	0	0	0	7	0	0	1	0	1	0	0	0	0	0	2	0	0	0	2	0
OTU_1078	Bacteria	Marinimicrobia (SAR406 clade)	uncultured bacterium	uncultured bacterium	uncultured bacterium	uncultured bacterium	uncultured bacterium	0	0	0	0	3	0	0	0	0	0	0	0	0	0	2	1	0	1	0	0	0	0	0	0
OTU_1079	Bacteria	Proteobacteria	Gammaproteobacteria	Francisellales	Francisellaceae	uncultured	uncultured bacterium	0	0	3	0	0	0	0	0	6	0	0	0	0	0	1	0	0	0	0	0	0	0	0	0
OTU_108	Bacteria	Actinobacteria	Acidimicrobiia	Microtrichales	Microtrichaceae	Sva0996 marine group	uncultured bacterium	4	84	36	3	3	5	9	3	23	0	0	2	4	27	38	18	7	1	2	3	0	3	31	0
OTU_1080	Bacteria	Chloroflexi	Dehalococcoidia	SAR202 clade	uncultured bacterium	uncultured bacterium	uncultured bacterium	0	0	3	0	0	0	0	0	0	0	0	0	0	0	0	0	0	0	0	0	0	0	0	0
OTU_1081	Bacteria	Firmicutes	Bacilli	Bacillales	Bacillaceae	Bacillus	Bacillus hwajinpoensis	0	0	0	0	0	0	6	0	0	0	0	0	0	0	0	0	0	0	20	0	0	0	0	0
OTU_1082	Bacteria	Planctomycetes	Planctomycetacia	Pirellulales	Pirellulaceae	Rubripirellula	uncultured bacterium	0	0	0	0	0	0	0	0	0	0	0	0	0	0	0	0	0	5	0	0	0	0	0	0
OTU_1083	Bacteria	Bacteroidetes	Bacteroidia	Cytophagales	Cyclobacteriaceae	uncultured	uncultured Flammeovirgaceae bacterium	0	0	0	0	0	0	0	0	0	0	0	0	0	0	0	0	0	0	6	0	5	0	0	0
OTU_1085	Bacteria	Verrucomicrobia	Verrucomicrobiae	Opitutales	Puniceicoccaceae	MB11C04 marine group	uncultured bacterium	17	2	0	0	0	0	0	0	2	0	0	0	0	1	0	0	0	0	0	0	0	0	1	0
OTU_1086	Bacteria	Proteobacteria	Deltaproteobacteria	Oligoflexales	Oligoflexaceae	uncultured	Unclassified	6	0	0	0	0	0	0	0	0	0	0	0	0	0	0	0	0	0	0	0	0	0	0	0
OTU_1087	Bacteria	Proteobacteria	Alphaproteobacteria	Sneathiellales	Sneathiellaceae	Sneathiella	uncultured bacterium	0	0	0	0	0	0	0	0	0	0	0	0	0	0	0	0	0	0	0	0	0	3	0	0
OTU_1088	Bacteria	Planctomycetes	Phycisphaerae	Phycisphaerales	Phycisphaeraceae	uncultured	uncultured bacterium	0	0	0	0	0	0	0	0	4	0	1	0	0	0	2	0	0	0	0	0	5	3	0	0
OTU_1089	Bacteria	Chloroflexi	Dehalococcoidia	SAR202 clade	uncultured bacterium	uncultured bacterium	uncultured bacterium	0	1	3	0	1	1	0	0	0	0	0	0	0	1	7	0	2	2	0	0	0	0	0	0
OTU_109	Bacteria	Proteobacteria	Gammaproteobacteria	Alteromonadales	Alteromonadaceae	Alteromonas	uncultured Alteromonas sp.	46	14	16	1651	18	138	5	72	146	2614	390	647	0	7	2	32	34	16	10	708	890	218	116	3
OTU_1090	Bacteria	Proteobacteria	Gammaproteobacteria	Coxiellales	Coxiellaceae	Coxiella	uncultured bacterium	0	0	0	0	0	0	4	0	0	0	0	0	12	0	0	0	0	0	0	0	0	0	0	0
OTU_1091	Bacteria	Bacteroidetes	Bacteroidia	Flavobacteriales	Flavobacteriaceae	Maritimimonas	uncultured bacterium	0	0	0	0	0	6	0	0	0	0	0	0	0	0	0	0	0	0	0	0	0	0	0	0
OTU_1092	Bacteria	Proteobacteria	Gammaproteobacteria	Betaproteobacteriales	Nitrosomonadaceae	MND1	uncultured bacterium	0	0	0	0	0	3	0	0	0	0	0	0	0	0	0	0	2	0	0	0	0	0	0	0
OTU_1093	Bacteria	Proteobacteria	Alphaproteobacteria	Rhizobiales	Devosiaceae	Pelagibacterium	Pelagibacterium luteolum	0	0	0	0	0	0	0	0	0	0	0	0	5	0	0	0	0	0	0	0	0	0	0	0
OTU_1094	Bacteria	Marinimicrobia (SAR406 clade)	uncultured bacterium	uncultured bacterium	uncultured bacterium	uncultured bacterium	uncultured bacterium	3	3	4	0	0	0	0	0	0	0	0	0	0	2	1	0	0	0	0	0	0	1	4	0
OTU_1096	Bacteria	Cyanobacteria	Oxyphotobacteria	Unclassified	Unclassified	Unclassified	Unclassified	0	0	0	0	0	0	0	0	0	0	0	0	0	0	0	0	0	0	5	1	0	0	0	0
OTU_1097	Bacteria	Bacteroidetes	Bacteroidia	Flavobacteriales	Cryomorphaceae	uncultured	uncultured Bacteroidetes bacterium	0	0	1	0	0	0	0	0	1	0	0	0	0	0	0	0	0	0	0	14	0	0	0	0
OTU_1098	Bacteria	Proteobacteria	Gammaproteobacteria	Coxiellales	Coxiellaceae	Coxiella	uncultured bacterium	1	0	0	0	0	0	4	0	0	0	0	0	6	0	0	0	0	0	0	0	0	0	2	0
OTU_11	Bacteria	Proteobacteria	Alphaproteobacteria	Unclassified	Unclassified	Unclassified	Unclassified	2	6	1	4	329	27	1	1	0	0	37	7	0	0	8	117	755	108	0	2	5	83	40	0
OTU_110	Bacteria	Actinobacteria	Acidimicrobiia	Microtrichales	Microtrichaceae	Sva0996 marine group	marine metagenome	0	1	0	0	1	1	59	9	6	0	0	0	509	0	1	2	1	3	19	0	0	10	94	0
OTU_1100	Bacteria	Proteobacteria	Gammaproteobacteria	MD2904-B13	uncultured bacterium	uncultured bacterium	uncultured bacterium	0	0	0	0	0	0	0	0	0	0	0	0	0	0	0	0	0	0	0	4	0	0	0	0
OTU_1101	Bacteria	Bacteroidetes	Bacteroidia	Flavobacteriales	Flavobacteriaceae	Lutibacter	uncultured bacterium	0	0	0	0	0	0	0	0	0	0	0	0	0	0	0	0	0	0	0	0	0	0	9	0
OTU_1102	Bacteria	Proteobacteria	Gammaproteobacteria	Betaproteobacteriales	Nitrosomonadaceae	Unclassified	Unclassified	1	0	0	0	0	0	0	0	0	0	0	0	5	0	0	0	0	0	3	0	0	0	0	0
OTU_1103	Bacteria	Acidobacteria	Subgroup 6	uncultured bacterium KM3-25-B4	uncultured bacterium KM3-25-B4	uncultured bacterium KM3-25-B4	uncultured bacterium KM3-25-B4	0	0	2	3	0	0	0	0	0	0	0	0	0	0	2	14	0	0	0	0	0	0	0	0
OTU_1104	Bacteria	Verrucomicrobia	Verrucomicrobiae	Arctic97B-4 marine group	uncultured bacterium AD243-C9	uncultured bacterium AD243-C9	uncultured bacterium AD243-C9	0	8	14	0	2	1	0	0	1	0	0	0	0	2	8	0	3	2	0	0	2	0	0	0
OTU_1105	Bacteria	Proteobacteria	Deltaproteobacteria	Bradymonadales	Unclassified	Unclassified	Unclassified	0	0	0	0	0	0	0	0	0	0	0	0	0	0	0	0	0	0	0	0	0	2	4	0
OTU_1106	Bacteria	Acidobacteria	Subgroup 6	Unclassified	Unclassified	Unclassified	Unclassified	0	0	0	0	5	3	0	0	0	0	0	0	0	0	0	17	10	6	0	0	0	0	2	0
OTU_1107	Bacteria	Firmicutes	Negativicutes	Selenomonadales	Veillonellaceae	Veillonella	uncultured organism	0	0	0	0	0	0	0	0	0	0	0	1	0	0	0	0	0	0	8	0	0	0	1	0
OTU_1108	Bacteria	Proteobacteria	Deltaproteobacteria	Bdellovibrionales	Bdellovibrionaceae	OM27 clade	uncultured bacterium	0	1	0	0	0	0	0	2	0	0	0	0	0	0	0	0	0	0	1	0	0	0	1	0
OTU_1109	Bacteria	Proteobacteria	Alphaproteobacteria	Puniceispirillales	SAR116 clade	metagenome	metagenome	6	0	0	0	0	0	0	0	1	1	2	0	0	0	0	0	0	0	0	0	0	0	0	0
OTU_111	Bacteria	Bacteroidetes	Bacteroidia	Chitinophagales	Saprospiraceae	uncultured	uncultured bacterium	0	1	3	0	0	1	0	4	90	0	0	0	0	3	1	0	0	0	1	222	0	0	0	0
OTU_1110	Bacteria	Proteobacteria	Alphaproteobacteria	Puniceispirillales	SAR116 clade	marine metagenome	marine metagenome	4	0	2	0	0	1	0	0	0	0	0	0	0	1	0	0	0	0	0	0	0	0	0	0
OTU_1111	Bacteria	Proteobacteria	Gammaproteobacteria	Cellvibrionales	Porticoccaceae	C1-B045	uncultured bacterium	0	0	0	0	0	0	0	0	0	0	0	0	0	0	0	0	0	0	0	0	3	0	0	0
OTU_1112	Bacteria	Chloroflexi	Dehalococcoidia	SAR202 clade	uncultured Thermomicrobium sp.	uncultured Thermomicrobium sp.	uncultured Thermomicrobium sp.	0	0	0	0	2	3	0	0	0	0	0	0	0	0	0	0	3	0	0	0	0	0	0	0
OTU_1113	Bacteria	Proteobacteria	Deltaproteobacteria	Unclassified	Unclassified	Unclassified	Unclassified	0	0	3	0	0	0	0	2	2	0	0	0	0	1	1	1	0	6	0	2	0	0	3	0
OTU_1114	Bacteria	Proteobacteria	Gammaproteobacteria	SAR86 clade	uncultured marine bacterium 311	uncultured marine bacterium 311	uncultured marine bacterium 311	0	9	0	0	0	0	0	0	0	0	0	0	0	2	0	0	0	0	0	1	0	0	0	0
OTU_1115	Bacteria	Proteobacteria	Deltaproteobacteria	Myxococcales	Blfdi19	uncultured marine bacterium	uncultured marine bacterium	0	0	0	0	0	0	0	0	0	0	0	0	0	0	0	0	0	0	0	0	6	0	0	0
OTU_1116	Bacteria	Bacteroidetes	Bacteroidia	Flavobacteriales	Flavobacteriaceae	Marixanthomonas	uncultured bacterium	0	0	0	1	1	0	0	0	0	0	0	4	0	0	0	0	6	0	0	0	0	0	0	0
OTU_1117	Bacteria	Actinobacteria	Actinobacteria	Corynebacteriales	Corynebacteriaceae	Corynebacterium 1	unidentified	0	0	0	0	2	0	0	0	0	0	0	1	0	0	0	2	0	0	0	0	0	13	0	0
OTU_1118	Bacteria	Proteobacteria	Gammaproteobacteria	Unclassified	Unclassified	Unclassified	Unclassified	0	0	0	0	0	0	0	0	0	0	0	0	0	0	5	0	0	0	0	0	0	0	0	0
OTU_1119	Bacteria	Verrucomicrobia	Verrucomicrobiae	Opitutales	Puniceicoccaceae	A714019	uncultured verrucomicrobium HF0500_27H16	0	4	6	0	0	0	0	0	1	0	0	0	0	1	8	0	0	0	0	0	0	0	0	0
OTU_112	Bacteria	Patescibacteria	Gracilibacteria	Candidatus Peregrinibacteria	uncultured marine bacterium	uncultured marine bacterium	uncultured marine bacterium	3	5	2	18	33	26	2	0	3	0	0	0	8	9	16	40	16	21	3	2	0	1	6	0
OTU_1121	Bacteria	Proteobacteria	Gammaproteobacteria	Oceanospirillales	Oleiphilaceae	Oleiphilus	uncultured gamma proteobacterium	0	4	0	0	0	0	0	9	2	0	1	0	0	0	0	0	0	0	0	0	0	0	0	0
OTU_1122	Bacteria	Proteobacteria	Deltaproteobacteria	NB1-j	uncultured bacterium	uncultured bacterium	uncultured bacterium	0	0	0	0	14	2	0	0	0	0	1	0	0	0	0	5	1	5	0	0	0	0	0	0
OTU_1124	Bacteria	Proteobacteria	Gammaproteobacteria	Alteromonadales	Alteromonadaceae	Alteromonas	uncultured Alteromonas sp.	1	1	0	8	1	1	0	4	1	85	18	3	0	0	0	0	0	0	2	11	10	6	1	0
OTU_1125	Bacteria	Proteobacteria	Deltaproteobacteria	Bdellovibrionales	Bdellovibrionaceae	OM27 clade	uncultured bacterium	0	0	0	0	1	0	0	0	0	0	0	0	0	0	0	0	0	1	0	1	0	5	0	0
OTU_1126	Bacteria	Chloroflexi	Dehalococcoidia	SAR202 clade	uncultured sediment bacterium	uncultured sediment bacterium	uncultured sediment bacterium	0	0	0	0	0	0	0	0	0	0	0	0	0	0	6	0	0	0	0	0	0	0	0	0
OTU_1127	Bacteria	Chloroflexi	Dehalococcoidia	SAR202 clade	uncultured Chloroflexi bacterium	uncultured Chloroflexi bacterium	uncultured Chloroflexi bacterium	0	0	1	0	0	0	0	0	0	0	0	0	0	0	3	5	0	4	0	0	0	0	0	0
OTU_1128	Bacteria	Proteobacteria	Deltaproteobacteria	PB19	uncultured delta proteobacterium DeepAnt-32C6	uncultured delta proteobacterium DeepAnt-32C6	uncultured delta proteobacterium DeepAnt-32C6	0	0	0	0	0	0	0	1	2	0	0	0	0	0	0	0	0	0	0	6	4	0	7	0
OTU_1129	Bacteria	Chloroflexi	KD4-96	uncultured bacterium	uncultured bacterium	uncultured bacterium	uncultured bacterium	0	0	0	0	2	3	0	0	2	0	0	0	0	0	0	0	0	0	0	0	0	1	0	0
OTU_113	Bacteria	Proteobacteria	Alphaproteobacteria	Rhodobacterales	Rhodobacteraceae	Roseovarius	Roseovarius indicus	1	6	0	2	0	0	2	4	1	0	0	0	9	0	0	0	0	0	63	0	3	0	0	0
OTU_1130	Bacteria	Bacteroidetes	Bacteroidia	Bacteroidales	Bacteroidaceae	Bacteroides	Bacteroides stercoris CC31F	0	0	0	0	0	0	0	0	0	0	0	0	0	0	0	0	0	0	0	1	5	0	0	0
OTU_1131	Bacteria	Marinimicrobia (SAR406 clade)	uncultured bacterium	uncultured bacterium	uncultured bacterium	uncultured bacterium	uncultured bacterium	0	0	0	0	0	0	0	0	0	0	0	0	0	0	0	0	0	0	0	3	0	0	0	0
OTU_1132	Bacteria	Gemmatimonadetes	BD2-11 terrestrial group	Gemmatimonadetes bacterium SCGC AAA240-J22	Gemmatimonadetes bacterium SCGC AAA240-J22	Gemmatimonadetes bacterium SCGC AAA240-J22	Gemmatimonadetes bacterium SCGC AAA240-J22	0	83	17	2	0	6	0	0	0	0	0	0	0	49	24	9	0	0	0	1	4	0	0	0
OTU_1133	Bacteria	Proteobacteria	Deltaproteobacteria	Myxococcales	Sandaracinaceae	Sandaracinus	uncultured bacterium	0	0	0	0	0	0	0	0	2	0	0	0	0	0	0	0	0	1	0	0	11	0	1	0
OTU_1134	Bacteria	Proteobacteria	Deltaproteobacteria	Desulfarculales	Desulfarculaceae	uncultured	uncultured delta proteobacterium	0	0	0	1	1	0	0	0	8	1	1	1	0	0	0	2	0	3	0	0	6	5	7	0
OTU_1135	Bacteria	Proteobacteria	Deltaproteobacteria	PB19	uncultured delta proteobacterium DeepAnt-1F12	uncultured delta proteobacterium DeepAnt-1F12	uncultured delta proteobacterium DeepAnt-1F12	0	4	0	0	0	0	0	0	1	0	0	0	0	0	0	0	0	0	0	0	0	3	5	0
OTU_1136	Bacteria	Actinobacteria	Actinobacteria	Actinomycetales	Actinomycetaceae	Varibaculum	Varibaculum sp. Marseille-P2802	0	0	0	0	3	0	0	0	0	0	0	0	0	0	0	0	0	0	0	0	0	0	0	0
OTU_1137	Bacteria	Bacteroidetes	Bacteroidia	Cytophagales	Cyclobacteriaceae	Marivirga	Marivirga tractuosa DSM 4126	0	0	0	0	0	4	0	0	0	0	0	0	0	0	0	0	0	0	0	0	0	0	0	0
OTU_1138	Bacteria	Planctomycetes	OM190	Unclassified	Unclassified	Unclassified	Unclassified	0	0	0	0	0	0	0	0	0	0	0	0	0	4	0	0	0	0	0	0	0	0	0	0
OTU_1139	Bacteria	Planctomycetes	Planctomycetacia	Pirellulales	Pirellulaceae	Unclassified	Unclassified	0	0	0	0	4	0	0	0	0	0	0	0	0	0	0	0	0	0	0	0	0	0	0	0
OTU_114	Bacteria	Proteobacteria	Gammaproteobacteria	Pseudomonadales	Moraxellaceae	Psychrobacter	Psychrobacter pacificensis	8	7	0	15	13	5	57	23	0	0	0	0	1	9	1	32	80	0	0	61	212	0	0	0
OTU_1140	Bacteria	Proteobacteria	Alphaproteobacteria	Rhizobiales	Beijerinckiaceae	Bosea	uncultured bacterium	0	0	1	0	0	0	0	0	6	0	0	0	0	0	0	0	0	0	0	0	0	0	0	0
OTU_1141	Bacteria	Marinimicrobia (SAR406 clade)	uncultured bacterium	uncultured bacterium	uncultured bacterium	uncultured bacterium	uncultured bacterium	0	10	0	0	0	0	0	0	0	0	0	0	0	0	0	0	0	0	0	0	0	0	0	0
OTU_1142	Bacteria	Proteobacteria	Gammaproteobacteria	Coxiellales	Coxiellaceae	Coxiella	uncultured bacterium	0	0	0	0	0	0	0	0	0	0	0	0	0	0	0	0	0	4	0	0	0	0	0	0
OTU_1143	Bacteria	Chloroflexi	Dehalococcoidia	SAR202 clade	Unclassified	Unclassified	Unclassified	0	0	4	0	1	1	0	0	0	0	0	0	0	0	2	0	1	1	0	0	0	0	0	0
OTU_1144	Bacteria	Verrucomicrobia	Verrucomicrobiae	Opitutales	Puniceicoccaceae	Cerasicoccus	uncultured deep-sea bacterium	0	0	4	0	2	3	0	0	0	0	0	0	0	0	4	0	2	2	0	0	0	0	0	0
OTU_1145	Bacteria	Proteobacteria	Deltaproteobacteria	Unclassified	Unclassified	Unclassified	Unclassified	0	0	0	0	0	0	0	0	0	0	0	0	0	0	0	0	0	0	0	0	12	0	0	0
OTU_1146	Bacteria	Chloroflexi	Dehalococcoidia	SAR202 clade	Unclassified	Unclassified	Unclassified	0	0	1	0	0	0	0	0	0	0	0	0	0	0	7	0	0	0	0	0	0	0	0	0
OTU_1147	Bacteria	Bacteroidetes	Bacteroidia	Flavobacteriales	Flavobacteriaceae	Pseudofulvibacter	uncultured bacterium	0	0	0	0	0	0	0	0	0	0	0	0	0	0	0	0	0	0	13	0	0	0	0	0
OTU_1148	Bacteria	Bacteroidetes	Bacteroidia	Chitinophagales	Saprospiraceae	Unclassified	Unclassified	0	0	0	0	0	0	0	0	0	0	0	0	0	0	0	0	0	0	0	3	0	0	1	0
OTU_1149	Bacteria	Bacteroidetes	Bacteroidia	Chitinophagales	Saprospiraceae	uncultured	uncultured Bacteroidetes bacterium	0	0	0	0	0	0	0	0	0	0	0	0	0	0	0	0	0	0	9	0	0	2	0	0
OTU_115	Bacteria	Epsilonbacteraeota	Campylobacteria	Campylobacterales	Sulfurovaceae	Sulfurovum	Folliculinopsis sp. SKG-2010a associated epsilon proteobacterium	0	0	0	1	37	68	0	0	0	2	0	7	0	0	0	1	26	13	0	0	1	1	3	0
OTU_1150	Bacteria	Proteobacteria	Deltaproteobacteria	Bdellovibrionales	Bdellovibrionaceae	OM27 clade	uncultured bacterium	0	7	3	0	0	0	0	0	0	0	0	0	0	1	2	0	0	0	3	5	9	0	9	0
OTU_1153	Bacteria	Nitrospinae	P9X2b3D02	uncultured bacterium	uncultured bacterium	uncultured bacterium	uncultured bacterium	0	0	3	0	9	2	0	0	0	0	0	0	0	0	2	1	3	0	0	0	0	0	0	0
OTU_1154	Bacteria	Fibrobacteres	Fibrobacteria	Fibrobacterales	Fibrobacteraceae	Unclassified	Unclassified	0	0	0	0	0	0	0	0	0	0	0	0	0	0	0	0	0	0	4	0	0	0	0	0
OTU_1155	Bacteria	Actinobacteria	Acidimicrobiia	Microtrichales	Microtrichaceae	uncultured	uncultured bacterium	1	59	46	16	12	2	0	0	0	0	0	0	0	37	61	31	3	1	0	3	3	0	0	0
OTU_1156	Bacteria	Proteobacteria	Deltaproteobacteria	Bdellovibrionales	Bdellovibrionaceae	OM27 clade	uncultured bacterium	0	1	0	0	0	0	0	0	4	0	0	0	0	1	0	0	0	0	0	2	8	4	0	0
OTU_1158	Bacteria	Planctomycetes	Planctomycetacia	Planctomycetales	Gimesiaceae	uncultured	uncultured planctomycete	0	1	4	1	1	0	0	0	0	0	0	0	0	0	13	1	2	0	0	0	2	0	0	0
OTU_116	Bacteria	Actinobacteria	Actinobacteria	Propionibacteriales	Propionibacteriaceae	uncultured	uncultured Actinomycetales bacterium	0	8	7	4	15	20	7	3	0	7	0	0	12	5	2	22	3	11	106	10	5	3	0	0
OTU_1160	Bacteria	Proteobacteria	Deltaproteobacteria	SAR324 clade(Marine group B)	Unclassified	Unclassified	Unclassified	0	3	0	0	0	0	0	0	0	0	0	0	0	4	1	0	0	0	0	0	0	0	0	0
OTU_1161	Bacteria	Proteobacteria	Gammaproteobacteria	Vibrionales	Vibrionaceae	uncultured	Vibrionaceae bacterium NSCS20N07D	1	0	0	0	1	1	0	0	0	0	0	0	1	0	0	1	0	0	28	1	0	0	0	0
OTU_1162	Bacteria	Planctomycetes	Planctomycetacia	Planctomycetales	uncultured	uncultured bacterium	uncultured bacterium	0	0	0	0	3	0	0	0	0	0	2	0	0	0	0	0	4	2	0	0	0	2	1	0
OTU_1163	Bacteria	Proteobacteria	Gammaproteobacteria	Alteromonadales	Alteromonadaceae	Salinimonas	Salinimonas sp. TB125_2	0	0	0	6	5	0	0	2	0	1	3	0	0	0	0	0	0	0	0	0	1	1	3	0
OTU_1164	Bacteria	Proteobacteria	Gammaproteobacteria	Coxiellales	Coxiellaceae	Coxiella	Unclassified	0	0	0	0	0	0	0	0	0	0	0	0	0	0	0	0	0	0	0	0	0	6	0	0
OTU_1165	Bacteria	Planctomycetes	Unclassified	Unclassified	Unclassified	Unclassified	Unclassified	0	0	0	0	0	0	0	0	0	0	0	0	0	0	0	0	0	9	0	0	0	0	0	0
OTU_1166	Bacteria	Planctomycetes	Planctomycetacia	Pirellulales	Pirellulaceae	Bythopirellula	uncultured bacterium	0	0	0	0	3	0	0	0	0	0	0	0	0	0	0	7	0	0	0	0	0	0	0	0
OTU_1167	Bacteria	Proteobacteria	Deltaproteobacteria	PB19	uncultured marine bacterium	uncultured marine bacterium	uncultured marine bacterium	0	0	6	0	0	2	0	0	5	0	0	0	0	1	6	0	0	1	0	0	7	0	2	0
OTU_1168	Bacteria	Planctomycetes	Pla3 lineage	uncultured bacterium	uncultured bacterium	uncultured bacterium	uncultured bacterium	0	0	27	2	8	15	0	1	12	0	0	0	0	1	31	8	1	0	0	1	12	0	3	0
OTU_1169	Bacteria	Acidobacteria	Subgroup 5	uncultured deep-sea bacterium	uncultured deep-sea bacterium	uncultured deep-sea bacterium	uncultured deep-sea bacterium	0	0	3	0	0	1	0	0	0	0	0	0	0	0	15	0	0	0	0	0	0	0	0	0
OTU_117	Bacteria	Proteobacteria	Alphaproteobacteria	Rickettsiales	S25-593	uncultured bacterium	uncultured bacterium	0	45	43	8	38	49	0	0	20	0	0	1	0	7	50	12	10	47	0	6	14	26	13	0
OTU_1170	Bacteria	Proteobacteria	Alphaproteobacteria	Rhodospirillales	Magnetospiraceae	uncultured	uncultured bacterium	4	0	0	0	0	0	0	0	0	0	0	1	0	0	0	0	0	0	0	0	0	1	0	0
OTU_1171	Bacteria	Planctomycetes	Planctomycetacia	Planctomycetales	Rubinisphaeraceae	uncultured	uncultured Planctomycetaceae bacterium	0	0	1	0	6	1	0	0	1	0	0	1	0	0	1	7	5	0	9	0	0	0	3	0
OTU_1172	Bacteria	Planctomycetes	BD7-11	uncultured planctomycete	uncultured planctomycete	uncultured planctomycete	uncultured planctomycete	0	0	0	0	0	0	0	0	1	0	0	0	0	0	0	0	0	0	0	0	11	0	0	0
OTU_1173	Bacteria	Chloroflexi	Dehalococcoidia	SAR202 clade	uncultured marine microorganism	uncultured marine microorganism	uncultured marine microorganism	0	0	9	0	0	0	0	0	0	0	0	0	0	3	6	0	0	0	0	0	0	0	0	0
OTU_1174	Bacteria	Patescibacteria	Gracilibacteria	Candidatus Peribacteria	uncultured bacterium	uncultured bacterium	uncultured bacterium	0	0	0	0	0	0	0	0	0	0	0	0	0	0	0	0	0	0	0	0	0	3	0	0
OTU_1175	Bacteria	Proteobacteria	Gammaproteobacteria	Gammaproteobacteria Incertae Sedis	Unknown Family	Candidatus Berkiella	uncultured bacterium	0	0	0	0	0	7	0	0	0	0	0	0	0	0	0	0	0	0	0	0	0	0	0	0
OTU_1176	Bacteria	Proteobacteria	Gammaproteobacteria	Ectothiorhodospirales	Ectothiorhodospiraceae	Thiogranum	uncultured bacterium	0	0	3	0	0	0	0	0	0	0	0	0	0	0	0	0	0	0	0	0	0	0	0	0
OTU_1177	Bacteria	Proteobacteria	Gammaproteobacteria	HgCo23	uncultured bacterium	uncultured bacterium	uncultured bacterium	0	24	1	0	0	0	1	0	0	0	0	0	0	14	4	0	0	0	0	0	0	0	0	0
OTU_1179	Bacteria	Proteobacteria	Deltaproteobacteria	Bdellovibrionales	Bdellovibrionaceae	OM27 clade	Unclassified	0	0	0	0	0	0	0	7	0	0	0	0	0	0	0	0	0	0	0	0	0	0	0	0
OTU_118	Bacteria	Planctomycetes	OM190	uncultured bacterium	uncultured bacterium	uncultured bacterium	uncultured bacterium	0	0	2	3	0	16	0	0	71	1	8	50	0	0	0	0	0	1	0	0	81	45	72	0
OTU_1180	Bacteria	Chloroflexi	Dehalococcoidia	SAR202 clade	uncultured Bacteroidetes/Chlorobi group bacterium	uncultured Bacteroidetes/Chlorobi group bacterium	uncultured Bacteroidetes/Chlorobi group bacterium	6	7	2	0	0	0	0	0	0	0	0	1	0	3	0	0	0	0	0	7	0	0	0	0
OTU_1182	Bacteria	Proteobacteria	Alphaproteobacteria	SAR11 clade	Unclassified	Unclassified	Unclassified	0	5	0	0	0	0	0	0	0	0	0	0	0	1	2	0	0	0	0	0	0	0	0	0
OTU_1183	Bacteria	Proteobacteria	Gammaproteobacteria	Legionellales	Legionellaceae	uncultured	uncultured bacterium	0	0	0	0	0	2	0	0	0	0	0	0	0	0	1	0	0	1	0	0	0	0	0	0
OTU_1184	Bacteria	Proteobacteria	Alphaproteobacteria	uncultured	uncultured bacterium	uncultured bacterium	uncultured bacterium	0	0	0	0	0	3	0	0	0	0	0	0	0	0	0	0	0	0	0	0	0	0	0	0
OTU_1185	Bacteria	Planctomycetes	Pla3 lineage	uncultured planctomycete	uncultured planctomycete	uncultured planctomycete	uncultured planctomycete	0	0	0	0	0	7	0	0	0	0	0	0	0	0	0	0	0	0	0	0	0	0	0	0
OTU_1186	Bacteria	Actinobacteria	Actinobacteria	Micrococcales	Brevibacteriaceae	Brevibacterium	Brevibacterium sp. K01-11	0	0	2	0	1	0	0	0	0	0	0	0	0	0	0	1	1	2	0	0	1	6	0	0
OTU_1187	Bacteria	Bacteroidetes	Bacteroidia	Flavobacteriales	Flavobacteriaceae	Pseudofulvibacter	uncultured bacterium	0	0	0	0	0	0	0	1	0	0	0	0	0	0	0	0	0	0	1	7	0	0	1	0
OTU_1188	Bacteria	Proteobacteria	Deltaproteobacteria	NB1-j	uncultured deep-sea bacterium	uncultured deep-sea bacterium	uncultured deep-sea bacterium	0	0	0	0	1	0	0	0	0	0	0	0	0	0	0	0	0	0	0	0	0	4	2	0
OTU_1189	Bacteria	Proteobacteria	Gammaproteobacteria	Piscirickettsiales	Piscirickettsiaceae	Candidatus Endoecteinascidia	uncultured bacterium	2	0	1	0	0	1	0	0	0	0	0	0	0	0	0	0	0	1	0	0	0	6	4	0
OTU_119	Bacteria	Nitrospinae	Nitrospinia	Nitrospinales	Nitrospinaceae	Nitrospina	uncultured bacterium	0	29	76	1	5	10	0	1	30	0	0	0	0	41	77	23	3	12	0	1	13	4	0	0
OTU_1190	Bacteria	Bacteroidetes	Bacteroidia	Cytophagales	Cyclobacteriaceae	uncultured	Unclassified	0	0	0	0	0	0	0	0	0	0	0	0	0	0	0	0	0	0	0	0	2	0	6	0
OTU_1191	Bacteria	Proteobacteria	Gammaproteobacteria	Francisellales	Francisellaceae	[Caedibacter] taeniospiralis group	Unclassified	0	0	0	0	0	0	0	0	0	0	0	0	0	0	0	0	0	0	10	0	0	0	0	0
OTU_1192	Bacteria	Unclassified	Unclassified	Unclassified	Unclassified	Unclassified	Unclassified	0	0	0	0	0	0	0	0	0	0	0	0	0	0	0	0	0	0	3	0	0	0	0	0
OTU_1195	Bacteria	Bacteroidetes	Bacteroidia	Flavobacteriales	Crocinitomicaceae	Fluviicola	marine metagenome	16	0	0	0	0	0	1	1	0	0	0	0	0	0	0	0	0	0	8	0	0	9	2	0
OTU_1196	Bacteria	Acidobacteria	Subgroup 6	uncultured bacterium KM3-173-A5	uncultured bacterium KM3-173-A5	uncultured bacterium KM3-173-A5	uncultured bacterium KM3-173-A5	0	16	0	0	0	0	0	0	0	0	0	0	0	6	3	0	0	0	0	0	0	0	0	0
OTU_1197	Bacteria	Planctomycetes	Planctomycetacia	Pirellulales	Pirellulaceae	Blastopirellula	uncultured planctomycete	0	0	0	0	0	0	0	0	1	0	0	0	0	0	0	0	0	0	0	0	0	6	1	0
OTU_1198	Bacteria	Proteobacteria	Alphaproteobacteria	Rhodobacterales	Rhodobacteraceae	Unclassified	Unclassified	0	0	0	0	0	0	0	0	0	0	0	0	0	0	0	0	0	0	0	4	0	0	0	0
OTU_1199	Bacteria	Bacteroidetes	Bacteroidia	Flavobacteriales	Flavobacteriaceae	NS2b marine group	uncultured marine bacterium	0	0	0	0	0	0	0	0	0	0	0	0	0	0	0	0	0	0	8	0	0	0	0	0
OTU_12	Bacteria	Proteobacteria	Alphaproteobacteria	Rhizobiales	Rhizobiaceae	Pseudohoeflea	Hoeflea sp. AY-2	7	1	0	176	265	374	0	8	7	85	68	506	0	0	5	197	190	88	0	0	0	105	161	2
OTU_120	Bacteria	Proteobacteria	Alphaproteobacteria	Rickettsiales	S25-593	uncultured bacterium	uncultured bacterium	1	28	8	0	19	23	0	2	11	0	0	0	0	4	7	10	11	8	0	1	1	7	5	0
OTU_1200	Bacteria	Proteobacteria	Deltaproteobacteria	Myxococcales	P3OB-42	uncultured bacterium	uncultured bacterium	0	0	5	0	0	0	0	2	6	0	0	0	0	0	1	0	1	0	0	9	0	0	0	0
OTU_1201	Bacteria	Proteobacteria	Alphaproteobacteria	Sphingomonadales	Sphingomonadaceae	Sphingomonas	Unclassified	0	0	0	1	2	0	0	0	0	0	1	0	0	0	3	0	0	0	0	0	0	0	0	0
OTU_1202	Bacteria	Proteobacteria	Gammaproteobacteria	Piscirickettsiales	Piscirickettsiaceae	Piscirickettsia	Piscirickettsia salmonis LF-89 = ATCC VR-1361	0	0	0	0	0	0	0	0	0	0	0	0	1	0	0	0	0	0	4	0	0	0	0	0
OTU_1203	Bacteria	Actinobacteria	Actinobacteria	Corynebacteriales	Corynebacteriaceae	Corynebacterium 1	Corynebacterium sp. HMSC072A02	0	0	1	0	1	0	0	0	5	0	0	6	0	0	0	13	14	0	0	0	0	0	1	0
OTU_1204	Bacteria	Acidobacteria	Subgroup 6	uncultured Acidobacterium sp.	uncultured Acidobacterium sp.	uncultured Acidobacterium sp.	uncultured Acidobacterium sp.	0	0	0	6	10	3	0	0	0	0	0	0	0	0	0	1	3	9	0	0	0	0	0	0
OTU_1205	Bacteria	Unclassified	Unclassified	Unclassified	Unclassified	Unclassified	Unclassified	0	0	0	0	0	0	0	0	0	0	0	0	0	0	0	0	0	0	0	0	0	0	6	0
OTU_1206	Bacteria	Proteobacteria	Alphaproteobacteria	Rickettsiales	Rickettsiaceae	uncultured	uncultured bacterium	0	0	0	0	0	0	0	0	0	0	0	0	0	0	0	0	0	0	0	0	0	0	5	0
OTU_1207	Bacteria	Proteobacteria	Gammaproteobacteria	Cellvibrionales	Porticoccaceae	Porticoccus	Porticoccus hydrocarbonoclasticus MCTG13d	0	0	0	0	0	0	0	0	0	0	0	0	0	0	0	0	0	0	0	0	0	0	0	7
OTU_1208	Bacteria	Proteobacteria	Deltaproteobacteria	Myxococcales	Blfdi19	Unclassified	Unclassified	0	0	0	0	0	0	0	0	0	0	0	0	0	0	0	0	0	0	5	0	0	0	0	0
OTU_1209	Bacteria	Bacteroidetes	Bacteroidia	Flavobacteriales	Flavobacteriaceae	Winogradskyella	Winogradskyella sp. MOLA 379	10	0	3	5	6	19	0	2	19	0	0	0	1	7	0	2	0	2	8	40	3	12	4	12
OTU_121	Bacteria	Proteobacteria	Gammaproteobacteria	UBA10353 marine group	hydrothermal vent metagenome	hydrothermal vent metagenome	hydrothermal vent metagenome	0	77	36	10	51	76	0	2	3	0	0	0	0	35	45	37	37	110	0	1	0	5	0	0
OTU_1210	Bacteria	Proteobacteria	Gammaproteobacteria	Ectothiorhodospirales	Ectothiorhodospiraceae	uncultured	uncultured marine bacterium	22	0	1	0	1	1	2	0	0	0	0	0	0	0	0	0	0	0	0	0	0	0	0	0
OTU_1211	Bacteria	Proteobacteria	Gammaproteobacteria	Ectothiorhodospirales	Ectothiorhodospiraceae	uncultured	marine metagenome	3	0	0	0	0	5	1	0	0	0	0	0	0	0	0	0	0	0	0	0	0	0	0	0
OTU_1212	Bacteria	Proteobacteria	Gammaproteobacteria	Alteromonadales	Pseudoalteromonadaceae	Unclassified	Unclassified	0	0	0	0	0	0	0	0	0	0	0	0	0	0	0	0	1	0	0	0	10	0	0	0
OTU_1213	Bacteria	Proteobacteria	Gammaproteobacteria	UBA10353 marine group	uncultured bacterium	uncultured bacterium	uncultured bacterium	0	2	3	0	2	4	0	0	0	0	0	0	0	1	4	0	2	5	0	0	0	0	0	0
OTU_1214	Bacteria	PAUC34f	uncultured bacterium	uncultured bacterium	uncultured bacterium	uncultured bacterium	uncultured bacterium	0	0	9	2	3	12	0	2	5	2	0	0	0	2	16	0	3	16	0	1	0	0	0	0
OTU_1215	Bacteria	Chloroflexi	TK10	marine metagenome	marine metagenome	marine metagenome	marine metagenome	0	0	0	0	3	0	0	0	0	0	0	0	0	0	0	1	1	1	0	0	0	0	0	0
OTU_1216	Bacteria	Proteobacteria	Gammaproteobacteria	Coxiellales	Coxiellaceae	Coxiella	Unclassified	0	0	0	0	0	2	0	0	0	0	0	0	0	0	0	0	0	0	6	0	0	9	0	0
OTU_1217	Bacteria	Proteobacteria	Gammaproteobacteria	Xanthomonadales	Xanthomonadaceae	Arenimonas	uncultured bacterium	0	0	0	0	0	0	0	0	0	0	0	0	0	0	0	1	0	0	0	1	12	0	2	0
OTU_1219	Bacteria	Proteobacteria	Unclassified	Unclassified	Unclassified	Unclassified	Unclassified	0	0	0	0	0	0	0	0	0	0	0	0	1	0	0	0	0	0	0	8	0	0	2	0
OTU_122	Bacteria	Planctomycetes	OM190	Unclassified	Unclassified	Unclassified	Unclassified	0	1	0	0	0	0	0	12	53	4	2	9	0	2	0	0	0	0	0	20	39	27	19	0
OTU_1220	Bacteria	Bacteroidetes	Bacteroidia	Flavobacteriales	NS9 marine group	marine metagenome	marine metagenome	0	0	0	0	0	0	0	0	0	0	0	0	1	0	0	0	0	0	15	0	0	0	0	0
OTU_1221	Bacteria	Proteobacteria	Alphaproteobacteria	Holosporales	Holosporaceae	uncultured	uncultured bacterium	0	0	0	0	0	0	0	0	0	0	0	0	2	0	0	0	0	0	4	0	0	0	0	0
OTU_1222	Bacteria	Proteobacteria	Deltaproteobacteria	SAR324 clade(Marine group B)	SAR324 cluster bacterium JCVI-SC AAA005	SAR324 cluster bacterium JCVI-SC AAA005	SAR324 cluster bacterium JCVI-SC AAA005	4	0	0	1	0	0	0	1	2	0	0	0	2	0	0	0	0	0	0	0	0	0	3	0
OTU_1223	Bacteria	Bacteroidetes	Bacteroidia	Flavobacteriales	Flavobacteriaceae	Lutimonas	uncultured bacterium	0	0	0	0	0	0	0	0	0	0	0	0	0	0	0	0	2	0	0	0	0	0	5	0
OTU_1224	Bacteria	Bacteroidetes	Bacteroidia	Flavobacteriales	Flavobacteriaceae	Meridianimaribacter	Meridianimaribacter sp. ZJ6316	1	0	0	0	0	1	0	0	0	0	0	0	0	1	0	0	0	0	0	0	8	0	0	0
OTU_1225	Bacteria	Actinobacteria	Thermoleophilia	Gaiellales	uncultured	metagenome	metagenome	0	0	0	0	0	2	0	0	0	0	0	0	0	1	2	0	0	0	0	4	0	0	0	0
OTU_1226	Bacteria	Actinobacteria	Actinobacteria	Propionibacteriales	Propionibacteriaceae	uncultured	Unclassified	0	0	0	0	0	0	0	0	0	10	0	0	0	0	0	0	0	0	0	1	7	0	0	0
OTU_1227	Bacteria	Gemmatimonadetes	BD2-11 terrestrial group	uncultured bacterium	uncultured bacterium	uncultured bacterium	uncultured bacterium	0	0	17	2	13	19	0	0	1	0	0	1	0	1	10	11	8	22	0	0	0	3	0	0
OTU_1228	Bacteria	Chloroflexi	Dehalococcoidia	SAR202 clade	Unclassified	Unclassified	Unclassified	0	0	0	0	0	5	0	0	0	0	0	0	0	0	0	0	0	0	0	0	0	0	0	0
OTU_1229	Bacteria	Proteobacteria	Gammaproteobacteria	Coxiellales	Coxiellaceae	Coxiella	Unclassified	0	0	0	0	0	0	4	0	0	0	0	0	1	0	0	0	0	0	0	0	0	0	1	0
OTU_123	Bacteria	Proteobacteria	Gammaproteobacteria	Thiotrichales	Thiotrichaceae	uncultured	uncultured marine bacterium	113	14	0	0	0	0	2	0	0	0	0	0	0	9	0	0	0	0	0	0	0	0	0	0
OTU_1230	Bacteria	Proteobacteria	Gammaproteobacteria	Gammaproteobacteria Incertae Sedis	Unknown Family	Candidatus Berkiella	uncultured bacterium	0	0	1	0	0	4	0	0	0	0	0	0	0	0	0	0	0	0	0	0	0	0	0	0
OTU_1231	Bacteria	Bacteroidetes	Bacteroidia	Flavobacteriales	Flavobacteriaceae	Tenacibaculum	Unclassified	0	0	0	0	0	0	0	0	0	0	0	0	0	3	0	0	0	0	1	0	0	0	0	0
OTU_1232	Bacteria	Planctomycetes	Planctomycetacia	Planctomycetales	uncultured	Unclassified	Unclassified	0	4	3	0	0	0	0	0	0	0	0	0	0	0	4	0	0	0	0	0	0	0	0	0
OTU_1233	Bacteria	Planctomycetes	Planctomycetacia	Planctomycetales	Gimesiaceae	Gimesia	Planctomyces sp.	0	0	2	0	4	0	0	0	4	0	0	0	0	1	0	0	0	1	0	1	0	0	0	0
OTU_1234	Bacteria	Proteobacteria	Gammaproteobacteria	Thiomicrospirales	Thioglobaceae	SUP05 cluster	uncultured gamma proteobacterium	0	0	0	0	0	17	0	0	1	0	0	0	0	0	0	0	0	1	0	0	0	0	0	0
OTU_1235	Bacteria	Proteobacteria	Gammaproteobacteria	Legionellales	Legionellaceae	Legionella	uncultured bacterium	0	0	0	0	9	0	0	0	0	0	0	0	0	0	1	0	1	0	0	0	0	0	0	0
OTU_1236	Bacteria	Proteobacteria	Deltaproteobacteria	Myxococcales	bacteriap25	uncultured bacterium	uncultured bacterium	0	4	0	0	0	0	0	0	0	0	0	0	0	2	0	0	0	0	0	0	0	0	0	0
OTU_1237	Bacteria	Proteobacteria	Deltaproteobacteria	Desulfuromonadales	Desulfuromonadaceae	Unclassified	Unclassified	0	0	1	0	1	0	0	0	0	0	0	0	0	0	0	0	0	0	0	0	1	0	7	0
OTU_1238	Bacteria	Chloroflexi	Dehalococcoidia	SAR202 clade	Unclassified	Unclassified	Unclassified	0	12	1	0	0	0	0	0	0	0	0	0	0	1	0	0	0	0	0	0	0	0	0	0
OTU_1239	Bacteria	Proteobacteria	Deltaproteobacteria	PB19	uncultured marine bacterium	uncultured marine bacterium	uncultured marine bacterium	0	0	0	0	0	0	0	0	0	0	0	0	1	0	0	0	0	1	0	1	0	0	10	0
OTU_124	Bacteria	Proteobacteria	Alphaproteobacteria	Micavibrionales	Micavibrionaceae	uncultured	uncultured organism	0	0	1	0	23	0	0	0	0	0	0	0	0	0	0	7	47	0	0	0	0	0	0	0
OTU_1240	Bacteria	Proteobacteria	Alphaproteobacteria	Rickettsiales	S25-593	uncultured bacterium	uncultured bacterium	0	5	0	0	0	0	0	0	0	0	0	0	0	3	0	0	0	0	2	0	0	0	1	0
OTU_1242	Bacteria	Proteobacteria	Gammaproteobacteria	Legionellales	Legionellaceae	Legionella	Unclassified	0	0	0	0	0	0	0	0	0	0	0	0	0	0	0	0	0	0	0	0	3	0	0	0
OTU_1243	Bacteria	Firmicutes	Bacilli	Bacillales	Staphylococcaceae	Salinicoccus	Salinicoccus roseus	0	0	1	0	3	0	0	0	0	0	0	0	0	0	1	0	0	0	0	0	7	1	0	0
OTU_1245	Bacteria	Bacteroidetes	Bacteroidia	Chitinophagales	Chitinophagaceae	uncultured	metagenome	0	0	0	0	0	0	0	0	0	0	0	0	0	0	0	3	0	0	0	0	0	0	0	0
OTU_1246	Bacteria	Marinimicrobia (SAR406 clade)	Marinimicrobia bacterium SCGC AAA003-E22	Marinimicrobia bacterium SCGC AAA003-E22	Marinimicrobia bacterium SCGC AAA003-E22	Marinimicrobia bacterium SCGC AAA003-E22	Marinimicrobia bacterium SCGC AAA003-E22	0	0	0	0	0	3	0	0	0	0	0	0	0	7	1	0	0	0	0	0	0	0	1	0
OTU_1247	Bacteria	Bacteroidetes	Bacteroidia	Flavobacteriales	Flavobacteriaceae	Unclassified	Unclassified	0	0	0	0	0	1	0	0	0	0	3	3	0	0	0	2	0	0	0	0	0	0	0	0
OTU_1248	Bacteria	Proteobacteria	Gammaproteobacteria	Steroidobacterales	Woeseiaceae	Woeseia	Unclassified	0	0	1	0	1	4	0	0	14	1	2	1	0	0	3	1	0	1	0	0	22	10	17	0
OTU_1249	Bacteria	Cyanobacteria	Oxyphotobacteria	Synechococcales	Cyanobiaceae	Synechococcus CC9902	uncultured cyanobacterium	86	1	7	1	7	11	177	1	1	1	0	1	1601	9	1	12	5	17	122	0	0	4	8	0
OTU_1250	Bacteria	Proteobacteria	Gammaproteobacteria	SAR86 clade	Unclassified	Unclassified	Unclassified	0	12	0	0	0	0	0	0	0	0	0	0	0	0	0	0	0	0	0	0	0	0	0	0
OTU_1252	Bacteria	Proteobacteria	Deltaproteobacteria	NB1-j	uncultured Planctomycetaceae bacterium	uncultured Planctomycetaceae bacterium	uncultured Planctomycetaceae bacterium	0	0	3	0	1	4	0	0	10	0	0	0	0	0	0	0	0	1	0	0	0	7	15	0
OTU_1253	Bacteria	Planctomycetes	028H05-P-BN-P5	uncultured bacterium	uncultured bacterium	uncultured bacterium	uncultured bacterium	0	0	0	0	0	0	0	0	13	0	0	0	0	0	0	0	0	0	0	12	10	0	0	0
OTU_1254	Bacteria	Bacteroidetes	Bacteroidia	Flavobacteriales	Cryomorphaceae	Owenweeksia	uncultured bacterium	0	2	1	0	0	0	0	5	2	0	0	0	0	1	0	0	0	0	2	1	0	0	0	6
OTU_1255	Bacteria	Proteobacteria	Deltaproteobacteria	Bdellovibrionales	Bdellovibrionaceae	OM27 clade	uncultured delta proteobacterium	0	0	0	0	1	1	0	0	0	0	0	1	0	0	0	0	0	0	0	0	2	4	4	0
OTU_1256	Bacteria	Proteobacteria	Gammaproteobacteria	Betaproteobacteriales	Burkholderiaceae	Acidovorax	uncultured bacterium	0	0	0	0	0	0	0	0	0	0	0	0	0	7	0	0	1	0	0	6	0	0	0	0
OTU_1257	Bacteria	Proteobacteria	Gammaproteobacteria	Betaproteobacteriales	Burkholderiaceae	MWH-UniP1 aquatic group	marine metagenome	38	0	0	0	0	0	12	0	1	0	0	0	0	1	0	0	0	0	18	5	0	0	0	0
OTU_1258	Bacteria	Chloroflexi	TK10	marine metagenome	marine metagenome	marine metagenome	marine metagenome	0	9	0	0	0	0	0	0	0	0	0	0	0	0	0	0	0	0	0	0	0	0	0	0
OTU_1259	Bacteria	Proteobacteria	Gammaproteobacteria	Coxiellales	Coxiellaceae	Coxiella	uncultured gamma proteobacterium	0	4	0	0	0	0	0	0	0	0	0	0	0	0	0	0	0	0	0	1	0	0	0	0
OTU_126	Bacteria	Actinobacteria	Acidimicrobiia	Microtrichales	Microtrichaceae	uncultured	uncultured bacterium	0	1	9	34	20	17	0	0	0	0	0	0	2	0	50	94	22	4	0	0	0	0	1	0
OTU_1260	Bacteria	Proteobacteria	Gammaproteobacteria	Unclassified	Unclassified	Unclassified	Unclassified	0	3	0	0	0	0	0	0	4	0	0	0	0	0	0	0	0	0	0	0	0	0	0	0
OTU_1261	Bacteria	Planctomycetes	Pla3 lineage	Unclassified	Unclassified	Unclassified	Unclassified	0	0	1	0	0	0	0	0	5	0	0	0	0	0	1	0	0	0	0	0	11	9	1	0
OTU_1262	Bacteria	Marinimicrobia (SAR406 clade)	uncultured marine bacterium	uncultured marine bacterium	uncultured marine bacterium	uncultured marine bacterium	uncultured marine bacterium	7	57	10	5	1	1	0	1	0	0	0	0	2	30	11	2	0	0	0	1	1	0	3	0
OTU_1263	Bacteria	Actinobacteria	Acidimicrobiia	Actinomarinales	Actinomarinaceae	Candidatus Actinomarina	uncultured bacterium	9	0	0	0	0	0	7	0	0	0	0	0	7	0	0	0	0	0	0	0	0	0	0	0
OTU_1264	Bacteria	Actinobacteria	Actinobacteria	Micrococcales	Micrococcaceae	Rothia	uncultured bacterium	0	0	0	0	0	1	0	1	0	0	0	0	0	0	0	0	0	0	18	0	0	0	0	0
OTU_1265	Bacteria	Planctomycetes	Planctomycetacia	Pirellulales	Pirellulaceae	Blastopirellula	uncultured planctomycete 8FN	0	9	0	0	1	0	0	0	0	0	0	0	0	5	0	0	0	0	0	0	0	0	0	0
OTU_1266	Bacteria	Proteobacteria	Alphaproteobacteria	Thalassobaculales	Nisaeaceae	OM75 clade	uncultured Rhodospirillaceae bacterium	4	0	0	0	0	1	0	1	0	0	0	0	1	0	0	0	0	0	4	0	0	0	0	0
OTU_1267	Bacteria	Proteobacteria	Alphaproteobacteria	Rhodobacterales	Rhodobacteraceae	Amylibacter	uncultured alpha proteobacterium	53	4	4	3	1	4	1	19	28	0	2	1	0	2	0	0	1	0	113	6	0	1	0	0
OTU_1268	Bacteria	Actinobacteria	Actinobacteria	Micrococcales	Microbacteriaceae	Microbacterium	Microbacterium chocolatum	0	0	1	0	0	5	0	0	0	0	0	0	0	0	1	0	0	0	0	0	1	0	0	0
OTU_1269	Bacteria	Actinobacteria	Actinobacteria	Corynebacteriales	Corynebacteriaceae	Corynebacterium 1	Corynebacterium glutamicum	0	0	0	1	0	0	0	0	0	0	0	0	0	0	0	0	1	0	8	0	0	0	0	0
OTU_127	Bacteria	Planctomycetes	Phycisphaerae	Phycisphaerales	Phycisphaeraceae	JL-ETNP-F27	uncultured planctomycete	0	7	7	3	5	68	0	1	1	2	0	0	0	2	10	3	10	30	0	0	8	2	11	0
OTU_1270	Bacteria	Firmicutes	Bacilli	Lactobacillales	Streptococcaceae	Streptococcus	uncultured organism	0	0	0	0	0	1	0	3	0	2	12	3	0	0	0	1	0	0	371	3	0	0	2	0
OTU_1271	Bacteria	Proteobacteria	Deltaproteobacteria	Myxococcales	Haliangiaceae	Haliangium	uncultured delta proteobacterium	0	0	0	0	0	1	0	0	6	0	0	0	0	0	1	0	0	0	0	1	5	0	1	0
OTU_1272	Bacteria	Proteobacteria	Gammaproteobacteria	Oceanospirillales	Alcanivoracaceae	Alcanivorax	uncultured bacterium	0	0	0	0	0	0	0	11	1	0	0	0	0	0	3	0	0	1	0	0	1	1	2	0
OTU_1273	Bacteria	Marinimicrobia (SAR406 clade)	uncultured bacterium	uncultured bacterium	uncultured bacterium	uncultured bacterium	uncultured bacterium	1	0	4	0	2	0	0	0	0	0	0	0	0	0	15	3	0	2	0	0	0	0	0	0
OTU_1274	Bacteria	Planctomycetes	OM190	hydrothermal vent metagenome	hydrothermal vent metagenome	hydrothermal vent metagenome	hydrothermal vent metagenome	0	0	0	0	0	0	0	2	0	0	0	0	0	1	0	0	0	0	0	12	0	0	0	0
OTU_1275	Bacteria	Bacteroidetes	Bacteroidia	Flavobacteriales	NS9 marine group	uncultured marine bacterium	uncultured marine bacterium	0	1	0	0	0	0	0	0	0	0	0	0	5	0	0	0	0	0	0	0	0	0	0	0
OTU_1276	Bacteria	Bacteroidetes	Bacteroidia	Cytophagales	Cyclobacteriaceae	uncultured	Unclassified	0	0	0	0	0	0	0	0	0	0	0	0	0	0	5	0	0	0	0	0	0	0	0	0
OTU_1277	Bacteria	Proteobacteria	Alphaproteobacteria	Rhodospirillales	Magnetospiraceae	uncultured	uncultured bacterium	3	4	0	0	0	0	1	0	0	0	0	0	1	1	0	0	0	0	0	0	0	0	4	0
OTU_1278	Bacteria	Proteobacteria	Deltaproteobacteria	NB1-j	uncultured bacterium	uncultured bacterium	uncultured bacterium	0	2	0	0	0	0	0	13	3	0	0	0	0	1	0	0	0	0	0	1	1	0	0	0
OTU_1279	Bacteria	Patescibacteria	Parcubacteria	Candidatus Campbellbacteria	Unclassified	Unclassified	Unclassified	1	0	0	0	0	0	1	0	0	0	0	1	0	0	0	0	0	0	0	0	0	0	0	0
OTU_128	Bacteria	Acidobacteria	Subgroup 21	uncultured deep-sea bacterium	uncultured deep-sea bacterium	uncultured deep-sea bacterium	uncultured deep-sea bacterium	0	7	32	5	25	27	0	0	0	0	0	0	0	4	47	8	24	40	0	0	0	0	1	0
OTU_1280	Bacteria	Proteobacteria	Gammaproteobacteria	Oceanospirillales	Saccharospirillaceae	Oleibacter	Oleibacter marinus	0	0	0	0	3	41	0	0	0	5	5	16	0	0	0	0	0	2	0	4	9	1	9	1
OTU_1281	Bacteria	Dependentiae	Babeliae	Babeliales	uncultured bacterium	uncultured bacterium	uncultured bacterium	0	0	0	0	0	2	0	0	0	0	0	3	0	0	0	3	0	0	0	0	0	4	0	0
OTU_1282	Bacteria	Patescibacteria	Gracilibacteria	uncultured bacterium	uncultured bacterium	uncultured bacterium	uncultured bacterium	0	0	0	0	0	7	0	0	0	0	0	0	0	0	0	0	0	0	0	0	0	0	0	0
OTU_1283	Bacteria	Proteobacteria	Alphaproteobacteria	Rickettsiales	AB1	uncultured marine bacterium	uncultured marine bacterium	0	0	0	0	0	0	0	3	0	0	0	0	0	0	0	0	0	0	0	2	0	0	0	0
OTU_1284	Bacteria	Marinimicrobia (SAR406 clade)	Unclassified	Unclassified	Unclassified	Unclassified	Unclassified	11	3	0	0	0	0	3	0	2	0	0	0	12	0	0	1	0	0	0	0	0	0	3	0
OTU_1285	Bacteria	Bacteroidetes	Bacteroidia	Flavobacteriales	NS9 marine group	uncultured marine bacterium	uncultured marine bacterium	0	0	0	0	0	0	1	0	0	0	0	0	0	0	0	0	0	0	1	0	0	0	11	0
OTU_1287	Bacteria	Chloroflexi	Dehalococcoidia	SAR202 clade	Unclassified	Unclassified	Unclassified	0	0	0	0	0	1	0	0	0	0	0	0	0	1	3	0	0	0	0	0	0	0	0	0
OTU_1288	Bacteria	Proteobacteria	Gammaproteobacteria	Legionellales	Legionellaceae	uncultured	uncultured bacterium	0	0	0	0	0	0	0	0	0	0	0	0	0	0	0	0	0	0	6	0	0	0	0	0
OTU_129	Bacteria	Patescibacteria	Gracilibacteria	Candidatus Peribacteria	uncultured Microgenomates group bacterium	uncultured Microgenomates group bacterium	uncultured Microgenomates group bacterium	0	0	0	10	15	14	0	0	0	0	0	0	0	0	0	13	4	12	0	0	0	0	0	0
OTU_1290	Bacteria	Marinimicrobia (SAR406 clade)	uncultured marine microorganism	uncultured marine microorganism	uncultured marine microorganism	uncultured marine microorganism	uncultured marine microorganism	0	1	1	0	0	0	0	0	0	0	0	0	0	1	18	0	2	4	0	0	0	0	0	0
OTU_1291	Bacteria	Bacteroidetes	Bacteroidia	Flavobacteriales	Flavobacteriaceae	Muricauda	uncultured bacterium	2	0	0	13	8	4	0	1	2	0	0	0	0	1	2	65	31	71	0	3	1	0	14	4
OTU_1292	Bacteria	Proteobacteria	Gammaproteobacteria	Pseudomonadales	Moraxellaceae	Acinetobacter	Acinetobacter bereziniae	0	0	0	0	0	0	0	0	0	6	0	0	0	0	0	0	0	0	0	0	0	0	0	0
OTU_1293	Bacteria	Proteobacteria	Deltaproteobacteria	Myxococcales	Nannocystaceae	uncultured	uncultured Enhygromyxa sp.	0	0	0	0	0	0	0	0	0	0	0	0	0	1	0	0	0	0	0	5	1	0	0	0
OTU_1294	Bacteria	Proteobacteria	Gammaproteobacteria	Gammaproteobacteria Incertae Sedis	Unknown Family	Candidatus Berkiella	uncultured bacterium	0	0	2	0	0	0	0	0	6	3	0	0	0	0	2	0	0	0	0	0	4	0	1	0
OTU_1295	Bacteria	Bacteroidetes	Bacteroidia	Flavobacteriales	NS9 marine group	uncultured marine bacterium	uncultured marine bacterium	0	0	0	0	0	7	0	0	1	0	0	0	0	0	0	0	0	4	0	0	0	0	0	0
OTU_1296	Bacteria	Proteobacteria	Gammaproteobacteria	Coxiellales	Coxiellaceae	Coxiella	uncultured bacterium	0	0	0	0	0	0	0	2	0	0	0	0	0	0	0	0	0	7	0	0	0	0	0	0
OTU_1297	Bacteria	Chloroflexi	Dehalococcoidia	SAR202 clade	marine metagenome	marine metagenome	marine metagenome	5	0	0	0	0	0	0	0	6	0	0	0	0	0	0	0	0	0	0	0	0	0	3	0
OTU_1298	Bacteria	Planctomycetes	OM190	uncultured bacterium	uncultured bacterium	uncultured bacterium	uncultured bacterium	0	0	0	0	0	0	0	0	0	0	0	0	0	0	0	0	0	0	13	0	0	0	2	0
OTU_1299	Bacteria	Proteobacteria	Gammaproteobacteria	EC3	uncultured marine bacterium	uncultured marine bacterium	uncultured marine bacterium	0	1	1	0	0	0	0	0	0	0	0	0	0	0	0	3	0	0	0	0	0	0	0	0
OTU_13	Bacteria	Cyanobacteria	Oxyphotobacteria	Synechococcales	Cyanobiaceae	Cyanobium PCC-6307	uncultured bacterium	19	1	2	7	15	41	41	0	3	0	0	1	874	1	9	41	6	10	842	24	9	14	20	0
OTU_130	Bacteria	Planctomycetes	Planctomycetacia	Pirellulales	Pirellulaceae	Rhodopirellula	marine metagenome	0	1	1	0	1	283	0	0	0	0	0	0	0	0	1	0	0	0	0	0	0	0	6	0
OTU_1300	Bacteria	Proteobacteria	Deltaproteobacteria	Myxococcales	Eel-36e1D6	uncultured bacterium	uncultured bacterium	0	0	0	0	0	2	0	0	0	0	0	0	0	0	0	0	1	0	0	0	6	0	4	0
OTU_1301	Bacteria	Proteobacteria	Alphaproteobacteria	Unclassified	Unclassified	Unclassified	Unclassified	0	0	0	0	0	0	2	0	0	0	0	0	0	0	0	0	0	0	3	0	0	0	0	0
OTU_1302	Bacteria	Proteobacteria	Deltaproteobacteria	Myxococcales	Haliangiaceae	Haliangium	uncultured deep-sea bacterium	0	0	0	0	0	0	0	0	0	0	0	0	0	0	0	0	0	0	0	0	0	8	0	0
OTU_1303	Bacteria	Chloroflexi	Dehalococcoidia	SAR202 clade	uncultured bacterium	uncultured bacterium	uncultured bacterium	0	0	0	0	8	15	0	0	0	0	0	0	0	0	0	1	1	1	0	0	0	0	0	0
OTU_1305	Bacteria	Actinobacteria	Actinobacteria	Micrococcales	Microbacteriaceae	Microbacterium	uncultured bacterium	0	0	0	0	0	0	0	0	0	0	0	0	0	0	0	0	0	0	0	0	10	0	0	0
OTU_1306	Bacteria	Proteobacteria	Gammaproteobacteria	Pseudomonadales	Moraxellaceae	Acinetobacter	Unclassified	0	0	0	0	0	0	0	0	0	2	0	0	0	0	0	0	0	0	0	0	4	0	0	0
OTU_1307	Bacteria	Cyanobacteria	Oxyphotobacteria	Nostocales	Chroococcidiopsaceae	Chroococcidiopsis SAG 2023	uncultured bacterium	0	0	0	0	0	0	0	0	0	0	0	0	0	0	0	0	0	0	2	0	0	0	3	0
OTU_1308	Bacteria	Bacteroidetes	Bacteroidia	Flavobacteriales	Flavobacteriaceae	Nonlabens	Nonlabens spongiae	0	0	0	0	17	1	0	0	0	0	0	0	0	0	0	0	5	0	0	0	4	1	0	0
OTU_1309	Bacteria	Proteobacteria	Deltaproteobacteria	NB1-j	uncultured Gemmatimonadetes bacterium	uncultured Gemmatimonadetes bacterium	uncultured Gemmatimonadetes bacterium	0	0	3	2	1	5	0	1	1	4	1	0	0	0	6	3	2	0	0	0	4	27	29	0
OTU_131	Bacteria	Actinobacteria	Actinobacteria	Micrococcales	Microbacteriaceae	Microbacterium	uncultured bacterium	0	0	1	1	1	47	2	0	7	0	0	0	0	6	2	4	19	16	6	24	3	0	2	13
OTU_1310	Bacteria	Planctomycetes	OM190	uncultured bacterium	uncultured bacterium	uncultured bacterium	uncultured bacterium	0	0	7	0	0	5	0	4	11	1	0	1	0	3	4	0	0	1	0	6	18	0	0	0
OTU_1311	Bacteria	Proteobacteria	Deltaproteobacteria	Bdellovibrionales	Bdellovibrionaceae	OM27 clade	uncultured bacterium	0	0	0	0	0	0	0	0	0	0	0	0	0	0	0	0	0	0	0	0	0	2	3	0
OTU_1312	Bacteria	Bacteroidetes	Bacteroidia	Cytophagales	Spirosomaceae	Taeseokella	uncultured bacterium	3	0	0	0	0	0	0	0	3	0	0	0	0	0	0	0	0	0	0	0	1	0	0	0
OTU_1313	Bacteria	WPS-2	marine metagenome	marine metagenome	marine metagenome	marine metagenome	marine metagenome	3	0	0	0	0	0	0	2	0	0	0	0	3	0	0	0	0	1	6	0	0	2	9	0
OTU_1314	Bacteria	Planctomycetes	OM190	uncultured bacterium	uncultured bacterium	uncultured bacterium	uncultured bacterium	0	0	0	0	0	0	0	0	3	0	0	0	0	0	0	0	0	0	0	0	6	0	0	0
OTU_1316	Bacteria	Proteobacteria	Deltaproteobacteria	NB1-j	uncultured bacterium	uncultured bacterium	uncultured bacterium	0	0	2	0	0	5	0	0	8	0	0	1	0	0	2	0	0	2	0	1	9	8	19	0
OTU_1317	Bacteria	Proteobacteria	Deltaproteobacteria	NB1-j	uncultured marine bacterium	uncultured marine bacterium	uncultured marine bacterium	0	0	0	0	0	0	2	0	0	0	0	0	0	0	0	0	0	0	13	0	0	0	0	0
OTU_1318	Bacteria	Proteobacteria	Alphaproteobacteria	Rhodospirillales	Unclassified	Unclassified	Unclassified	0	3	0	0	0	0	0	1	0	0	0	0	0	2	0	0	0	0	0	4	0	0	0	0
OTU_1319	Bacteria	Bacteroidetes	Bacteroidia	Chitinophagales	Saprospiraceae	uncultured	marine metagenome	0	9	0	0	0	1	0	0	0	0	0	0	0	0	0	0	0	0	0	0	0	0	0	0
OTU_132	Bacteria	Planctomycetes	Planctomycetacia	Pirellulales	Pirellulaceae	Blastopirellula	uncultured bacterium	3	2	0	0	0	0	7	1	3	0	0	0	86	0	0	0	1	1	137	3	0	3	4	0
OTU_1320	Bacteria	Proteobacteria	Alphaproteobacteria	SAR11 clade	Clade I	uncultured	uncultured bacterium	0	2	3	1	0	2	0	0	0	0	0	0	0	5	0	0	0	0	0	0	0	0	2	0
OTU_1321	Bacteria	Proteobacteria	Deltaproteobacteria	Bdellovibrionales	Bdellovibrionaceae	OM27 clade	uncultured bacterium	0	0	0	0	0	0	0	0	0	0	0	0	0	0	0	0	0	0	0	8	0	0	0	0
OTU_1322	Bacteria	Proteobacteria	Alphaproteobacteria	Rhodobacterales	Rhodobacteraceae	Rubellimicrobium	uncultured bacterium	0	0	0	0	0	0	0	0	0	0	0	0	0	0	0	0	0	0	0	4	0	0	0	0
OTU_1323	Bacteria	Proteobacteria	Deltaproteobacteria	Bdellovibrionales	Bdellovibrionaceae	OM27 clade	uncultured delta proteobacterium	0	0	0	0	0	0	0	3	0	0	0	0	0	0	0	0	0	0	0	5	0	0	0	0
OTU_1324	Bacteria	Proteobacteria	Deltaproteobacteria	Myxococcales	Blfdi19	uncultured marine bacterium	uncultured marine bacterium	0	0	0	0	0	0	0	0	0	0	0	0	0	0	0	0	0	0	0	0	7	0	0	0
OTU_1325	Bacteria	Proteobacteria	Alphaproteobacteria	Rickettsiales	Rickettsiaceae	uncultured	uncultured bacterium	0	0	0	0	0	0	0	0	0	0	0	0	0	0	5	0	0	0	0	0	0	0	0	0
OTU_1326	Bacteria	Proteobacteria	Gammaproteobacteria	Betaproteobacteriales	Burkholderiaceae	Noviherbaspirillum	uncultured bacterium	0	0	0	0	0	0	0	0	5	0	0	0	0	0	0	0	0	0	0	0	0	0	0	0
OTU_1327	Bacteria	Marinimicrobia (SAR406 clade)	uncultured bacterium	uncultured bacterium	uncultured bacterium	uncultured bacterium	uncultured bacterium	0	0	0	0	0	0	0	0	0	0	0	0	0	7	1	0	0	0	0	0	0	0	0	0
OTU_1328	Bacteria	Verrucomicrobia	Verrucomicrobiae	Opitutales	Puniceicoccaceae	Lentimonas	uncultured bacterium	0	0	0	0	0	0	0	0	0	0	0	0	0	0	0	0	0	0	0	0	0	9	0	0
OTU_1329	Bacteria	Chloroflexi	Dehalococcoidia	SAR202 clade	uncultured sediment bacterium	uncultured sediment bacterium	uncultured sediment bacterium	0	0	2	0	0	2	0	0	0	0	0	0	0	0	5	0	0	1	0	0	0	0	0	0
OTU_1330	Bacteria	Bacteroidetes	Bacteroidia	Flavobacteriales	Weeksellaceae	Chryseobacterium	Chryseobacterium indologenes	0	0	0	0	0	0	0	0	0	0	0	0	0	0	11	0	0	0	0	0	0	0	0	0
OTU_1331	Bacteria	Proteobacteria	Deltaproteobacteria	NB1-j	uncultured bacterium	uncultured bacterium	uncultured bacterium	0	0	4	0	0	0	0	5	52	1	0	1	0	1	2	0	0	0	2	16	29	5	0	0
OTU_1332	Bacteria	Bacteroidetes	Bacteroidia	Flavobacteriales	Unclassified	Unclassified	Unclassified	0	0	0	0	0	0	0	0	0	0	0	0	0	3	0	0	0	0	0	0	0	0	0	0
OTU_1333	Bacteria	Proteobacteria	Gammaproteobacteria	Oceanospirillales	P13-46	uncultured bacterium	uncultured bacterium	0	0	0	0	0	0	0	3	0	0	0	0	0	0	0	0	0	0	0	0	0	0	0	0
OTU_1334	Bacteria	Planctomycetes	Planctomycetacia	Pirellulales	Pirellulaceae	Rhodopirellula	uncultured bacterium	0	0	0	1	2	1	0	0	0	0	0	0	0	0	0	0	2	1	0	0	0	0	0	0
OTU_1335	Bacteria	Proteobacteria	Gammaproteobacteria	Piscirickettsiales	Piscirickettsiaceae	Candidatus Endoecteinascidia	Unclassified	0	0	0	0	0	0	0	0	0	0	0	0	0	0	7	0	0	0	0	0	0	0	0	0
OTU_1336	Bacteria	Proteobacteria	Alphaproteobacteria	Micavibrionales	Micavibrionaceae	uncultured	Unclassified	0	0	0	0	1	0	0	0	0	0	0	0	0	0	0	0	5	0	0	0	0	0	0	0
OTU_1337	Bacteria	Proteobacteria	Alphaproteobacteria	Rickettsiales	Rickettsiaceae	Unclassified	Unclassified	0	0	0	0	0	0	0	0	0	0	0	0	0	0	0	0	0	0	4	0	0	0	0	0
OTU_1338	Bacteria	Proteobacteria	Deltaproteobacteria	Myxococcales	Nannocystaceae	uncultured	uncultured bacterium	0	0	0	0	0	0	0	0	0	0	0	0	1	0	0	0	0	0	3	0	0	0	0	0
OTU_1339	Bacteria	Proteobacteria	Gammaproteobacteria	Alteromonadales	Alteromonadaceae	uncultured	uncultured Aestuariibacter sp.	0	0	0	3	0	0	0	0	0	0	0	0	0	0	0	0	1	2	0	12	1	1	0	3
OTU_1340	Bacteria	Bacteroidetes	Bacteroidia	Chitinophagales	Saprospiraceae	Lewinella	uncultured Saprospiraceae bacterium	0	0	0	0	0	0	0	0	0	0	0	0	0	0	0	0	0	0	0	0	4	0	0	0
OTU_1341	Bacteria	Fibrobacteres	Fibrobacteria	Fibrobacterales	Fibrobacteraceae	uncultured	uncultured deep-sea bacterium	0	0	0	0	0	0	0	0	0	0	0	0	0	0	0	0	0	0	0	0	6	0	0	0
OTU_1342	Bacteria	Chloroflexi	TK10	marine metagenome	marine metagenome	marine metagenome	marine metagenome	0	0	1	0	1	2	0	0	0	0	0	0	0	0	3	0	1	3	0	0	0	0	0	0
OTU_1343	Bacteria	Bacteroidetes	Bacteroidia	Cytophagales	Cyclobacteriaceae	uncultured	uncultured Cytophaga sp.	0	3	0	0	0	0	0	0	0	0	0	0	0	0	0	0	0	0	0	0	0	0	0	0
OTU_1344	Bacteria	Chloroflexi	Dehalococcoidia	SAR202 clade	uncultured bacterium	uncultured bacterium	uncultured bacterium	0	0	1	0	0	0	0	0	0	0	0	0	0	0	2	1	0	0	0	0	0	0	0	0
OTU_1345	Bacteria	Verrucomicrobia	Verrucomicrobiae	Verrucomicrobiales	DEV007	uncultured organism	uncultured organism	0	9	0	0	0	0	0	0	0	0	0	0	0	1	0	0	0	0	2	3	0	0	0	0
OTU_1346	Bacteria	Nitrospinae	Nitrospinia	Nitrospinales	Nitrospinaceae	Nitrospina	uncultured bacterium	0	6	0	0	0	0	0	0	0	0	0	0	0	2	0	0	0	0	0	0	0	0	0	0
OTU_1347	Bacteria	Marinimicrobia (SAR406 clade)	uncultured bacterium FGYC_13M19	uncultured bacterium FGYC_13M19	uncultured bacterium FGYC_13M19	uncultured bacterium FGYC_13M19	uncultured bacterium FGYC_13M19	0	0	0	0	0	5	0	0	0	0	0	0	0	0	0	0	10	1	0	0	0	0	0	0
OTU_1348	Bacteria	Marinimicrobia (SAR406 clade)	uncultured bacterium	uncultured bacterium	uncultured bacterium	uncultured bacterium	uncultured bacterium	0	0	4	1	1	0	0	0	0	0	0	0	0	0	1	5	0	1	0	0	0	0	0	0
OTU_1349	Bacteria	Proteobacteria	Gammaproteobacteria	Coxiellales	Coxiellaceae	Coxiella	Unclassified	0	1	0	0	0	0	0	5	0	0	0	0	0	0	0	0	0	0	3	1	0	0	0	0
OTU_135	Bacteria	Marinimicrobia (SAR406 clade)	metagenome	metagenome	metagenome	metagenome	metagenome	197	0	3	0	1	5	24	3	6	0	0	1	71	17	0	3	0	0	8	0	0	3	23	0
OTU_1350	Bacteria	Chloroflexi	Dehalococcoidia	SAR202 clade	Unclassified	Unclassified	Unclassified	0	0	6	0	0	0	0	0	0	0	0	0	0	0	0	0	0	0	0	0	0	0	0	0
OTU_1352	Bacteria	Proteobacteria	Alphaproteobacteria	Caulobacterales	Hyphomonadaceae	Robiginitomaculum	uncultured Robiginitomaculum sp.	0	0	0	3	0	0	0	0	0	0	0	0	0	0	0	0	0	0	0	0	0	0	0	0
OTU_1353	Bacteria	Actinobacteria	Actinobacteria	Micrococcales	Microbacteriaceae	Microbacterium	Microbacterium sp. TSWCW12	0	0	0	0	3	0	0	1	0	0	0	0	0	0	0	0	0	0	0	0	0	0	0	0
OTU_1354	Bacteria	Proteobacteria	Alphaproteobacteria	SAR11 clade	Clade II	uncultured bacterium	uncultured bacterium	2	142	106	7	20	52	0	1	62	3	1	0	0	83	118	17	12	17	0	30	30	10	14	0
OTU_1355	Bacteria	Proteobacteria	Gammaproteobacteria	HOC36	uncultured bacterium HF0770_27E13	uncultured bacterium HF0770_27E13	uncultured bacterium HF0770_27E13	0	0	15	0	0	3	0	0	0	0	0	0	0	0	7	3	3	3	0	0	0	0	0	0
OTU_1356	Bacteria	Proteobacteria	Gammaproteobacteria	JTB23	hydrothermal vent metagenome	hydrothermal vent metagenome	hydrothermal vent metagenome	0	0	0	0	0	0	0	0	0	0	0	0	0	0	0	0	0	0	0	0	0	2	2	0
OTU_1357	Bacteria	Patescibacteria	ABY1	Candidatus Uhrbacteria	Unclassified	Unclassified	Unclassified	0	0	0	0	1	2	0	0	0	0	0	0	0	0	0	2	0	0	0	0	0	2	6	0
OTU_1358	Bacteria	Bacteroidetes	Bacteroidia	Sphingobacteriales	AKYH767	Bacteroidetes bacterium OLB10	Bacteroidetes bacterium OLB10	0	0	0	0	0	0	0	0	0	0	0	0	0	0	0	0	0	0	0	0	11	0	0	0
OTU_1359	Bacteria	Planctomycetes	Planctomycetacia	Planctomycetales	Gimesiaceae	uncultured	uncultured planctomycete	0	0	0	0	0	0	0	0	0	0	0	0	6	0	0	0	0	0	2	0	0	0	0	0
OTU_136	Bacteria	Bacteroidetes	Bacteroidia	Flavobacteriales	Cryomorphaceae	Owenweeksia	uncultured bacterium	0	0	0	25	39	1	0	0	0	2	17	9	0	0	0	3	68	0	0	0	0	105	3	0
OTU_1360	Bacteria	Proteobacteria	Gammaproteobacteria	Legionellales	Legionellaceae	uncultured	uncultured organism	0	0	0	0	2	0	0	0	0	0	0	0	0	0	1	6	5	0	0	0	0	0	0	0
OTU_1362	Bacteria	Proteobacteria	Gammaproteobacteria	S1-3-65	endosymbiont of Vannella sp. A1	endosymbiont of Vannella sp. A1	endosymbiont of Vannella sp. A1	0	0	0	0	0	0	0	0	0	0	0	0	0	0	0	0	0	0	0	9	0	0	0	0
OTU_1364	Bacteria	Proteobacteria	Gammaproteobacteria	Coxiellales	Coxiellaceae	Coxiella	Unclassified	0	3	1	1	0	2	0	0	0	0	0	0	0	0	0	1	6	0	0	0	0	0	0	0
OTU_1365	Bacteria	Proteobacteria	Deltaproteobacteria	PB19	uncultured marine bacterium	uncultured marine bacterium	uncultured marine bacterium	0	0	0	0	0	1	0	0	0	0	0	1	0	0	0	0	0	0	0	0	0	0	20	0
OTU_1366	Bacteria	Nitrospinae	Nitrospinia	Nitrospinales	Nitrospinaceae	Nitrospina	uncultured bacterium	0	0	0	0	0	2	0	0	0	0	0	0	0	0	0	0	0	1	0	0	0	0	5	0
OTU_1368	Bacteria	Proteobacteria	Deltaproteobacteria	Bdellovibrionales	Bdellovibrionaceae	OM27 clade	uncultured bacterium	0	0	0	0	0	0	0	0	1	0	0	0	0	0	0	0	0	0	0	0	0	5	0	0
OTU_1370	Bacteria	Proteobacteria	Deltaproteobacteria	Unclassified	Unclassified	Unclassified	Unclassified	0	2	2	0	0	0	0	4	0	0	0	0	0	0	1	0	0	0	0	3	0	0	0	0
OTU_1371	Bacteria	Proteobacteria	Alphaproteobacteria	Acetobacterales	Acetobacteraceae	Roseomonas	uncultured bacterium	0	0	0	0	0	0	0	0	0	0	0	0	0	0	0	0	0	0	0	0	5	0	0	0
OTU_1372	Bacteria	Bacteroidetes	Bacteroidia	Chitinophagales	Saprospiraceae	uncultured	uncultured alpha proteobacterium	0	0	0	0	0	0	0	0	0	0	0	0	0	0	0	0	0	0	0	0	2	0	6	0
OTU_1373	Bacteria	PAUC34f	uncultured bacterium	uncultured bacterium	uncultured bacterium	uncultured bacterium	uncultured bacterium	0	1	10	0	0	5	0	0	1	0	0	0	0	0	11	0	8	13	0	0	0	0	0	0
OTU_1374	Bacteria	Planctomycetes	Pla3 lineage	hydrothermal vent metagenome	hydrothermal vent metagenome	hydrothermal vent metagenome	hydrothermal vent metagenome	0	0	2	0	0	0	0	0	8	0	0	0	0	0	3	0	0	0	0	0	2	0	0	0
OTU_1375	Bacteria	Chloroflexi	Dehalococcoidia	SAR202 clade	uncultured deep-sea bacterium	uncultured deep-sea bacterium	uncultured deep-sea bacterium	0	1	2	0	0	0	0	0	3	0	0	0	0	0	0	0	0	0	0	0	0	0	0	0
OTU_1376	Bacteria	Acidobacteria	Subgroup 6	uncultured bacterium AD106-G4	uncultured bacterium AD106-G4	uncultured bacterium AD106-G4	uncultured bacterium AD106-G4	0	2	10	5	7	4	0	0	0	0	0	0	0	1	5	1	7	2	0	0	4	0	0	0
OTU_1377	Bacteria	Firmicutes	Clostridia	Clostridiales	Family XI	Peptoniphilus	Peptoniphilus sp. KHD5	0	0	0	0	0	0	0	0	0	0	0	0	0	0	1	0	7	0	0	0	0	0	0	0
OTU_1378	Bacteria	Proteobacteria	Alphaproteobacteria	Micavibrionales	Unclassified	Unclassified	Unclassified	0	0	0	0	0	0	0	0	0	0	0	0	0	0	0	4	4	0	0	0	0	0	0	0
OTU_1379	Bacteria	Lentisphaerae	Lentisphaeria	Lentisphaerales	Lentisphaeraceae	Lentisphaera	uncultured bacterium	0	0	0	0	0	2	0	0	0	0	0	2	1	2	1	0	0	0	0	0	0	0	0	0
OTU_138	Bacteria	Unclassified	Unclassified	Unclassified	Unclassified	Unclassified	Unclassified	0	2	0	0	0	0	0	3	20	0	0	0	0	0	3	0	0	0	0	43	10	0	0	0
OTU_1380	Bacteria	Kiritimatiellaeota	Kiritimatiellae	WCHB1-41	Unclassified	Unclassified	Unclassified	0	0	0	0	0	0	0	0	0	0	0	0	0	0	0	0	0	0	0	4	0	0	0	0
OTU_1381	Bacteria	Bacteroidetes	Bacteroidia	Bacteroidales	Bacteroidaceae	Bacteroides	Bacteroides thetaiotaomicron	0	0	0	0	0	0	0	0	0	4	0	0	0	0	0	0	0	0	0	4	5	0	0	0
OTU_1382	Bacteria	Bacteroidetes	Bacteroidia	Chitinophagales	Saprospiraceae	Aureispira	uncultured Saprospiraceae bacterium	0	0	2	0	1	2	0	2	0	0	0	0	0	1	2	0	0	0	0	4	0	3	0	0
OTU_1383	Bacteria	Proteobacteria	Alphaproteobacteria	Unclassified	Unclassified	Unclassified	Unclassified	0	0	3	0	0	2	0	0	0	0	0	0	0	0	1	0	0	0	0	0	0	0	0	0
OTU_1384	Bacteria	Bacteroidetes	Bacteroidia	Flavobacteriales	NS7 marine group	uncultured bacterium	uncultured bacterium	0	6	5	0	1	0	0	4	10	0	0	0	0	1	2	0	0	0	1	6	0	0	0	0
OTU_1385	Bacteria	Marinimicrobia (SAR406 clade)	uncultured bacterium	uncultured bacterium	uncultured bacterium	uncultured bacterium	uncultured bacterium	4	0	0	0	0	0	0	1	0	0	0	0	1	0	0	0	0	0	0	0	0	0	0	0
OTU_1386	Bacteria	Proteobacteria	Gammaproteobacteria	Coxiellales	Coxiellaceae	Coxiella	uncultured Legionella sp.	0	0	0	0	0	0	0	1	0	0	0	0	0	1	0	3	0	0	0	2	0	0	0	0
OTU_1387	Bacteria	Planctomycetes	Planctomycetacia	Planctomycetales	uncultured	uncultured bacterium HF0500_40D21	uncultured bacterium HF0500_40D21	0	0	0	0	0	0	0	0	0	0	0	0	0	0	0	0	0	4	0	0	0	0	0	0
OTU_1389	Bacteria	Actinobacteria	Actinobacteria	Propionibacteriales	Propionibacteriaceae	Tessaracoccus	uncultured bacterium	0	0	0	0	0	0	0	0	0	0	0	0	0	0	0	0	0	0	0	0	16	0	0	0
OTU_139	Bacteria	Acidobacteria	Thermoanaerobaculia	Thermoanaerobaculales	Thermoanaerobaculaceae	Subgroup 10	Unclassified	0	0	6	9	24	6	0	0	4	0	0	0	0	0	16	22	25	8	0	0	0	0	0	0
OTU_1390	Bacteria	Actinobacteria	Actinobacteria	Streptomycetales	Streptomycetaceae	Streptomyces	Streptomyces sp. SA3_actG	0	0	0	0	0	0	0	0	0	0	1	23	0	0	0	0	0	0	0	0	0	0	0	0
OTU_1391	Bacteria	Planctomycetes	Planctomycetacia	Planctomycetales	uncultured	uncultured bacterium HF0500_40D21	uncultured bacterium HF0500_40D21	0	0	0	1	3	5	0	0	0	0	1	2	0	0	0	0	0	5	0	0	1	0	0	0
OTU_1392	Bacteria	Chloroflexi	Dehalococcoidia	SAR202 clade	Unclassified	Unclassified	Unclassified	0	0	1	0	0	1	0	0	0	0	0	0	0	0	1	0	0	0	0	0	0	0	0	0
OTU_1393	Bacteria	Proteobacteria	Alphaproteobacteria	Acetobacterales	Acetobacteraceae	Roseomonas	Roseomonas frigidaquae	0	0	0	0	0	0	0	0	0	0	0	0	0	0	0	0	0	0	0	0	2	0	0	0
OTU_1394	Bacteria	Chloroflexi	Dehalococcoidia	S085	Unclassified	Unclassified	Unclassified	0	0	0	0	1	0	0	0	0	0	0	0	0	0	0	0	2	0	0	0	0	0	0	0
OTU_1395	Bacteria	Proteobacteria	Gammaproteobacteria	Coxiellales	Coxiellaceae	Coxiella	uncultured bacterium	0	1	0	0	0	0	0	0	0	0	0	0	0	0	0	0	0	2	0	1	0	0	1	0
OTU_1396	Bacteria	Chloroflexi	Dehalococcoidia	S085	uncultured bacterium	uncultured bacterium	uncultured bacterium	0	6	0	0	0	0	0	0	0	0	0	0	0	4	0	0	0	0	0	0	0	0	0	0
OTU_1397	Bacteria	Actinobacteria	Actinobacteria	Micrococcales	Microbacteriaceae	Curtobacterium	Curtobacterium flaccumfaciens	0	0	0	0	3	0	0	0	0	0	0	1	0	0	0	0	0	0	3	0	1	0	0	0
OTU_1398	Bacteria	Proteobacteria	Gammaproteobacteria	Cellvibrionales	Halieaceae	Halioglobus	Halioglobus japonicus	0	0	0	0	0	0	0	0	0	0	0	0	0	0	0	0	0	0	0	0	0	0	2	0
OTU_1399	Bacteria	Proteobacteria	Deltaproteobacteria	Bdellovibrionales	Bdellovibrionaceae	Bdellovibrio	uncultured bacterium	0	0	0	0	0	0	0	0	0	0	0	0	0	0	0	0	0	0	0	0	0	4	0	0
OTU_14	Bacteria	Proteobacteria	Gammaproteobacteria	Betaproteobacteriales	Burkholderiaceae	Cupriavidus	uncultured bacterium	0	1	4	0	0	295	0	0	3	7	4	8	2	0	7	219	545	118	2	7	7	452	27	0
OTU_140	Bacteria	Proteobacteria	Gammaproteobacteria	Oceanospirillales	Alcanivoracaceae	Alcanivorax	Alcanivorax sp. MN1	6	0	3	1	7	172	0	0	6	2	10	83	0	4	0	1	2	9	1	54	8	5	23	100
OTU_1400	Bacteria	Proteobacteria	Alphaproteobacteria	Unclassified	Unclassified	Unclassified	Unclassified	0	0	0	0	0	0	0	0	6	0	0	0	0	0	0	0	0	0	0	0	0	0	0	0
OTU_1401	Bacteria	Proteobacteria	Deltaproteobacteria	NB1-j	uncultured organism	uncultured organism	uncultured organism	0	4	0	0	0	0	0	1	0	0	0	0	0	0	0	0	0	0	0	9	0	0	0	0
OTU_1402	Bacteria	Actinobacteria	Thermoleophilia	Gaiellales	Gaiellaceae	Gaiella	uncultured bacterium	0	0	0	0	0	0	0	0	0	4	0	0	0	0	0	0	0	0	0	0	0	0	0	0
OTU_1403	Bacteria	Proteobacteria	Deltaproteobacteria	NB1-j	uncultured bacterium	uncultured bacterium	uncultured bacterium	0	0	0	0	0	0	0	2	0	0	0	0	0	0	0	0	0	0	19	0	0	0	1	0
OTU_1404	Bacteria	Proteobacteria	Deltaproteobacteria	Bdellovibrionales	Bacteriovoracaceae	uncultured	hydrothermal vent metagenome	0	7	0	0	0	3	0	1	0	0	0	0	0	2	0	0	0	0	0	1	0	0	0	0
OTU_1405	Bacteria	Proteobacteria	Alphaproteobacteria	Rhodobacterales	Rhodobacteraceae	Maribius	Maribius sp. MOLA 401	0	0	0	4	31	5	0	0	0	1	24	20	0	0	0	6	4	2	0	0	9	2	5	0
OTU_1406	Bacteria	Proteobacteria	Gammaproteobacteria	Piscirickettsiales	Piscirickettsiaceae	Candidatus Endoecteinascidia	Unclassified	0	0	0	0	0	0	0	0	0	0	0	0	0	0	0	0	0	0	7	0	0	0	0	0
OTU_1407	Bacteria	Proteobacteria	Gammaproteobacteria	Legionellales	Legionellaceae	Legionella	uncultured bacterium	0	0	0	0	0	0	0	0	0	0	0	0	0	0	1	0	0	0	0	0	11	0	0	0
OTU_1408	Bacteria	Planctomycetes	028H05-P-BN-P5	uncultured bacterium	uncultured bacterium	uncultured bacterium	uncultured bacterium	0	0	0	0	0	0	0	4	0	0	0	0	0	0	0	0	1	0	0	0	0	0	2	0
OTU_1409	Bacteria	Proteobacteria	Deltaproteobacteria	Bdellovibrionales	Bdellovibrionaceae	OM27 clade	uncultured bacterium	0	0	0	0	0	0	0	0	3	0	0	0	0	0	0	1	0	0	0	1	1	0	0	0
OTU_141	Bacteria	Proteobacteria	Alphaproteobacteria	Rhodospirillales	Magnetospiraceae	uncultured	uncultured bacterium	0	0	46	3	57	60	0	0	1	0	1	7	0	0	76	21	46	82	0	0	0	18	4	1
OTU_1410	Bacteria	Proteobacteria	Gammaproteobacteria	Ectothiorhodospirales	Ectothiorhodospiraceae	uncultured	uncultured marine bacterium	0	3	0	0	0	0	0	0	4	0	0	0	0	1	0	0	0	0	0	0	0	0	0	0
OTU_1411	Bacteria	Firmicutes	Bacilli	Bacillales	Bacillaceae	Oceanobacillus	bacterium YIM-kkny4	0	0	0	0	0	0	0	0	0	0	0	0	0	0	0	0	0	0	0	0	0	2	0	0
OTU_1412	Bacteria	Bacteroidetes	Rhodothermia	Rhodothermales	Rhodothermaceae	Rubricoccus	Rubricoccus marinus	0	0	0	0	34	17	0	0	0	0	0	10	0	0	5	12	0	1	0	0	11	2	1	0
OTU_1413	Bacteria	Planctomycetes	Pla3 lineage	uncultured bacterium	uncultured bacterium	uncultured bacterium	uncultured bacterium	0	0	0	0	0	1	0	0	2	0	0	2	0	0	0	0	0	0	0	1	2	0	1	0
OTU_1415	Bacteria	Proteobacteria	Gammaproteobacteria	Unclassified	Unclassified	Unclassified	Unclassified	0	1	0	0	0	0	0	5	0	0	0	0	0	0	0	0	0	0	0	0	0	0	3	0
OTU_1416	Bacteria	Proteobacteria	Deltaproteobacteria	Myxococcales	Eel-36e1D6	uncultured bacterium	uncultured bacterium	0	0	0	0	1	0	0	0	0	0	0	0	0	0	0	0	0	0	0	0	0	3	2	0
OTU_1418	Bacteria	Planctomycetes	Phycisphaerae	Phycisphaerales	Phycisphaeraceae	Urania-1B-19 marine sediment group	uncultured bacterium	0	0	0	0	0	0	0	0	0	0	0	0	0	0	0	0	0	0	0	3	0	0	0	0
OTU_1419	Bacteria	Proteobacteria	Unclassified	Unclassified	Unclassified	Unclassified	Unclassified	0	0	0	0	0	0	0	0	0	0	0	0	0	0	0	0	0	0	3	0	0	0	0	0
OTU_142	Bacteria	Acidobacteria	Subgroup 6	uncultured bacterium KM3-205-D9	uncultured bacterium KM3-205-D9	uncultured bacterium KM3-205-D9	uncultured bacterium KM3-205-D9	1	40	31	26	38	10	0	0	0	0	0	0	0	26	44	73	65	13	0	0	0	1	1	0
OTU_1420	Bacteria	Bacteroidetes	Bacteroidia	Flavobacteriales	Flavobacteriaceae	NS4 marine group	uncultured Flavobacterium sp.	0	0	0	0	0	0	0	0	0	0	0	0	0	1	0	0	0	0	3	0	0	0	0	0
OTU_1421	Bacteria	Proteobacteria	Deltaproteobacteria	Bdellovibrionales	Bacteriovoracaceae	Peredibacter	Unclassified	1	2	0	9	1	0	0	0	0	0	0	0	0	0	0	0	0	2	0	0	0	0	0	0
OTU_1422	Bacteria	Planctomycetes	Planctomycetacia	Pirellulales	Pirellulaceae	Pirellula	uncultured Planctomycetales bacterium	0	0	0	0	0	0	0	1	0	0	0	0	0	0	0	0	0	0	4	0	0	0	0	0
OTU_1423	Bacteria	Chloroflexi	Dehalococcoidia	SAR202 clade	Unclassified	Unclassified	Unclassified	0	18	0	0	0	0	0	0	1	0	0	0	0	15	3	0	0	0	0	0	0	0	0	0
OTU_1424	Bacteria	Nitrospinae	Nitrospinia	Nitrospinales	Nitrospinaceae	Nitrospina	uncultured bacterium	0	6	0	0	0	0	0	0	0	0	0	0	0	0	0	0	0	0	0	0	0	0	0	0
OTU_1425	Bacteria	Proteobacteria	Deltaproteobacteria	Bdellovibrionales	Bdellovibrionaceae	OM27 clade	uncultured delta proteobacterium	0	0	0	0	0	0	0	4	0	0	0	0	0	0	0	0	0	0	0	10	0	0	0	0
OTU_1426	Bacteria	Acidobacteria	Subgroup 21	uncultured Acidobacterium sp.	uncultured Acidobacterium sp.	uncultured Acidobacterium sp.	uncultured Acidobacterium sp.	0	5	0	0	0	0	0	0	0	0	0	0	0	0	0	0	0	0	0	0	0	0	0	0
OTU_1427	Bacteria	Proteobacteria	Alphaproteobacteria	Micavibrionales	uncultured	uncultured alpha proteobacterium	uncultured alpha proteobacterium	0	0	0	0	0	0	0	0	0	0	0	0	0	0	0	0	0	0	0	0	0	0	5	0
OTU_1428	Bacteria	Proteobacteria	Gammaproteobacteria	Cellvibrionales	Porticoccaceae	SAR92 clade	uncultured marine bacterium	0	0	0	0	0	0	0	0	0	0	0	0	0	0	0	0	0	0	0	0	0	0	2	0
OTU_1429	Bacteria	Nitrospirae	Nitrospira	Nitrospirales	Nitrospiraceae	Leptospirillum	hydrothermal vent metagenome	0	0	0	0	0	0	0	0	0	0	0	3	0	0	0	0	0	0	0	0	0	9	5	0
OTU_143	Bacteria	Planctomycetes	Phycisphaerae	Phycisphaerales	Phycisphaeraceae	CL500-3	uncultured bacterium	0	7	0	0	3	4	0	22	25	0	0	0	0	6	2	1	0	0	18	69	14	2	7	0
OTU_1430	Bacteria	Planctomycetes	OM190	uncultured Planctomycetaceae bacterium	uncultured Planctomycetaceae bacterium	uncultured Planctomycetaceae bacterium	uncultured Planctomycetaceae bacterium	1	0	0	0	0	0	0	4	0	0	0	0	0	0	0	0	0	0	0	9	0	0	0	0
OTU_1431	Bacteria	Proteobacteria	Alphaproteobacteria	Rhodobacterales	Rhodobacteraceae	Pseudooceanicola	Oceanicola sp. S124	0	0	0	10	25	0	0	0	0	0	8	0	0	0	1	0	0	0	0	0	0	0	0	0
OTU_1432	Bacteria	Proteobacteria	Deltaproteobacteria	Desulfuromonadales	Unclassified	Unclassified	Unclassified	0	0	3	0	0	0	0	2	1	0	0	0	0	1	2	0	0	0	0	0	0	0	0	0
OTU_1433	Bacteria	Chloroflexi	Dehalococcoidia	SAR202 clade	uncultured sediment bacterium	uncultured sediment bacterium	uncultured sediment bacterium	0	0	1	0	0	0	0	0	0	0	0	0	0	5	0	0	0	0	0	4	0	0	0	0
OTU_1434	Bacteria	Firmicutes	Bacilli	Lactobacillales	Aerococcaceae	Abiotrophia	uncultured bacterium	0	0	0	0	0	0	0	2	0	0	0	0	0	0	0	0	0	0	9	0	0	0	0	0
OTU_1435	Bacteria	Bacteroidetes	Bacteroidia	Flavobacteriales	NS9 marine group	uncultured marine bacterium	uncultured marine bacterium	0	0	0	0	0	0	0	0	0	0	0	0	0	0	0	0	0	0	0	0	0	1	5	0
OTU_1436	Bacteria	Proteobacteria	Gammaproteobacteria	Steroidobacterales	Woeseiaceae	Woeseia	marine metagenome	14	0	0	0	0	0	0	0	0	0	0	0	3	0	0	0	0	0	0	0	0	6	0	0
OTU_1437	Bacteria	Proteobacteria	Gammaproteobacteria	Ga0077536	uncultured gamma proteobacterium	uncultured gamma proteobacterium	uncultured gamma proteobacterium	0	0	1	0	1	0	0	0	0	0	0	0	0	0	0	0	4	0	0	0	0	0	0	0
OTU_1438	Bacteria	Actinobacteria	Actinobacteria	Micrococcales	Dermabacteraceae	Brachybacterium	uncultured bacterium	0	0	0	2	5	1	0	0	3	0	0	0	0	0	0	4	0	0	1	0	0	1	1	0
OTU_1439	Bacteria	Proteobacteria	Deltaproteobacteria	Bdellovibrionales	Bacteriovoracaceae	Peredibacter	uncultured Peredibacter sp.	0	0	3	0	0	0	0	0	0	0	0	0	0	0	1	0	0	0	0	0	0	0	0	0
OTU_144	Bacteria	Bacteroidetes	Bacteroidia	Flavobacteriales	Flavobacteriaceae	Gramella	Gramella portivictoriae DSM 23547	3	0	0	64	8	3	1	9	0	6	12	59	2	1	2	47	14	5	0	0	0	2	0	0
OTU_1440	Bacteria	Kiritimatiellaeota	Kiritimatiellae	WCHB1-41	Unclassified	Unclassified	Unclassified	0	0	1	0	0	0	0	0	6	7	0	0	0	0	0	0	0	0	0	3	15	0	0	0
OTU_1441	Bacteria	Bacteroidetes	Bacteroidia	Flavobacteriales	Flavobacteriaceae	Gramella	uncultured Gramella sp.	0	0	0	2	0	0	0	0	0	0	0	0	0	0	0	6	0	1	0	0	0	0	4	0
OTU_1443	Bacteria	Bacteroidetes	Bacteroidia	Flavobacteriales	NS9 marine group	uncultured marine bacterium	uncultured marine bacterium	0	4	1	0	0	0	0	1	0	0	0	0	1	3	2	0	0	0	2	1	0	0	13	0
OTU_1444	Bacteria	Chloroflexi	Dehalococcoidia	SAR202 clade	Unclassified	Unclassified	Unclassified	0	0	0	0	0	10	0	0	0	0	0	0	0	0	0	0	0	0	0	0	0	0	0	0
OTU_1445	Bacteria	Margulisbacteria	uncultured bacterium	uncultured bacterium	uncultured bacterium	uncultured bacterium	uncultured bacterium	0	0	1	0	1	0	0	0	2	0	0	0	0	1	0	0	0	0	0	0	0	0	0	0
OTU_1446	Bacteria	Actinobacteria	Actinobacteria	Micrococcales	Demequinaceae	Demequina	Demequina sp. NBRC 110052	0	0	0	0	0	1	0	0	0	0	0	1	0	0	0	0	0	4	0	2	9	0	0	0
OTU_1447	Bacteria	Proteobacteria	Deltaproteobacteria	PB19	uncultured marine bacterium	uncultured marine bacterium	uncultured marine bacterium	0	0	0	0	0	0	0	0	0	0	0	0	0	0	0	0	0	0	2	0	0	0	0	0
OTU_1448	Bacteria	Actinobacteria	Actinobacteria	Propionibacteriales	Propionibacteriaceae	Cutibacterium	Cutibacterium acnes	0	0	1	0	0	0	0	0	2	2	1	2	0	0	0	0	0	1	6	0	12	0	8	0
OTU_1449	Bacteria	Actinobacteria	Actinobacteria	Propionibacteriales	Propionibacteriaceae	uncultured	metagenome	0	0	0	0	0	0	0	0	3	2	0	0	0	0	0	0	0	0	0	0	0	0	0	0
OTU_145	Bacteria	Proteobacteria	Alphaproteobacteria	Rhodobacterales	Rhodobacteraceae	Donghicola	uncultured bacterium	2	5	2	3	8	5	0	6	10	0	7	5	0	3	0	10	8	2	1	10	2	3	11	2
OTU_1450	Bacteria	Proteobacteria	Alphaproteobacteria	Acetobacterales	Acetobacteraceae	Roseomonas	Roseomonas rubra	0	0	0	0	0	0	0	0	0	0	0	0	0	0	0	0	0	0	0	0	0	0	2	0
OTU_1451	Bacteria	Planctomycetes	OM190	uncultured bacterium	uncultured bacterium	uncultured bacterium	uncultured bacterium	0	0	5	0	0	1	0	0	0	1	0	1	0	0	2	0	0	0	0	0	0	0	0	0
OTU_1452	Bacteria	Planctomycetes	OM190	uncultured bacterium	uncultured bacterium	uncultured bacterium	uncultured bacterium	0	1	6	0	0	5	0	10	18	0	0	0	0	2	10	0	0	0	0	12	12	0	1	0
OTU_1453	Bacteria	Proteobacteria	Gammaproteobacteria	Arenicellales	Arenicellaceae	HTCC5015	uncultured gamma proteobacterium	0	2	0	0	0	0	0	0	3	0	0	0	0	0	0	0	0	0	0	0	0	0	0	0
OTU_1454	Bacteria	Proteobacteria	Deltaproteobacteria	Unclassified	Unclassified	Unclassified	Unclassified	0	0	0	0	0	0	0	0	0	0	0	0	0	0	0	0	0	0	0	0	0	3	0	0
OTU_1455	Bacteria	Planctomycetes	OM190	Unclassified	Unclassified	Unclassified	Unclassified	0	9	0	0	0	0	0	0	1	0	0	0	0	3	0	0	0	0	0	2	0	0	0	0
OTU_1456	Bacteria	Proteobacteria	Deltaproteobacteria	Oligoflexales	Oligoflexaceae	uncultured	uncultured bacterium	3	3	3	0	0	0	0	0	0	0	0	0	1	1	0	0	0	0	0	0	0	0	0	0
OTU_1457	Bacteria	Proteobacteria	Gammaproteobacteria	Xanthomonadales	Xanthomonadaceae	Stenotrophomonas	Stenotrophomonas sp. SY4C	0	0	0	0	0	0	0	0	0	0	0	0	0	0	0	0	0	0	0	0	2	0	0	0
OTU_1458	Bacteria	Cyanobacteria	Oxyphotobacteria	Nostocales	Chroococcidiopsaceae	Chroococcidiopsis SAG 2023	uncultured bacterium	0	0	0	0	0	0	0	0	0	0	0	0	0	0	0	0	2	0	0	0	0	0	0	0
OTU_1459	Bacteria	Marinimicrobia (SAR406 clade)	uncultured marine bacterium	uncultured marine bacterium	uncultured marine bacterium	uncultured marine bacterium	uncultured marine bacterium	2	0	0	0	0	0	0	0	0	0	0	0	0	0	0	0	0	0	0	0	0	0	4	0
OTU_146	Bacteria	Proteobacteria	Alphaproteobacteria	uncultured	uncultured Rhodospirillales bacterium	uncultured Rhodospirillales bacterium	uncultured Rhodospirillales bacterium	0	16	34	3	5	12	0	0	1	0	0	0	0	5	22	6	3	9	0	0	0	0	0	0
OTU_1460	Bacteria	Marinimicrobia (SAR406 clade)	uncultured marine bacterium	uncultured marine bacterium	uncultured marine bacterium	uncultured marine bacterium	uncultured marine bacterium	0	27	0	0	0	0	0	2	0	0	0	0	0	23	5	0	0	0	0	0	0	0	0	0
OTU_1461	Bacteria	PAUC34f	uncultured bacterium	uncultured bacterium	uncultured bacterium	uncultured bacterium	uncultured bacterium	0	0	1	0	1	0	0	0	0	0	0	0	0	0	2	0	2	10	0	0	0	0	0	0
OTU_1462	Bacteria	Proteobacteria	Gammaproteobacteria	Xanthomonadales	Xanthomonadaceae	Stenotrophomonas	uncultured Stenotrophomonas sp.	0	0	0	0	0	0	0	0	0	0	0	1	0	0	0	4	0	0	0	0	0	0	3	0
OTU_1463	Bacteria	Chloroflexi	Dehalococcoidia	SAR202 clade	uncultured bacterium	uncultured bacterium	uncultured bacterium	0	0	1	0	0	3	0	0	0	0	0	0	0	0	4	0	1	2	0	0	0	3	0	0
OTU_1464	Bacteria	Planctomycetes	Planctomycetacia	Pirellulales	Pirellulaceae	Rhodopirellula	uncultured bacterium	0	0	2	0	0	1	0	0	0	0	0	0	0	0	1	0	0	0	0	0	1	0	0	0
OTU_1465	Bacteria	Verrucomicrobia	Verrucomicrobiae	Opitutales	Puniceicoccaceae	Lentimonas	uncultured bacterium	6	0	0	0	0	7	0	0	2	0	0	0	0	0	0	0	0	0	0	0	0	0	0	0
OTU_1466	Bacteria	Verrucomicrobia	Verrucomicrobiae	Arctic97B-4 marine group	uncultured organism	uncultured organism	uncultured organism	0	1	3	0	0	14	0	0	1	0	0	2	0	1	4	0	0	0	0	0	0	0	0	0
OTU_1467	Bacteria	Proteobacteria	Gammaproteobacteria	Thiomicrospirales	Thioglobaceae	SUP05 cluster	uncultured organism	0	0	0	0	0	0	0	0	0	0	0	0	0	2	0	0	0	0	0	0	0	0	0	0
OTU_1468	Bacteria	Firmicutes	Clostridia	Clostridiales	Family XI	Anaerococcus	uncultured bacterium	0	0	0	0	0	1	0	0	0	0	0	0	0	0	0	0	0	0	0	0	0	7	0	0
OTU_1469	Bacteria	Acidobacteria	Subgroup 6	Unclassified	Unclassified	Unclassified	Unclassified	0	12	0	0	0	0	0	0	0	0	0	0	0	5	0	0	0	0	0	0	0	0	0	0
OTU_147	Bacteria	Firmicutes	Bacilli	Bacillales	Staphylococcaceae	Staphylococcus	uncultured Staphylococcus sp.	3	1	1	45	128	55	5	89	54	39	14	7	0	2	7	35	11	3	3	11	23	16	14	0
OTU_1470	Bacteria	Proteobacteria	Alphaproteobacteria	Rickettsiales	Rickettsiaceae	Unclassified	Unclassified	0	0	0	0	0	0	0	0	2	0	0	0	0	0	0	0	0	0	0	0	0	0	0	0
OTU_1471	Bacteria	Proteobacteria	Gammaproteobacteria	Francisellales	Francisellaceae	uncultured	uncultured bacterium	0	0	0	0	0	0	0	0	3	0	0	0	0	1	0	0	0	0	0	0	0	0	0	0
OTU_1472	Bacteria	Proteobacteria	Deltaproteobacteria	Bdellovibrionales	Bdellovibrionaceae	OM27 clade	uncultured bacterium	0	0	0	0	0	1	0	0	0	0	1	0	0	0	0	0	0	0	0	0	1	0	1	0
OTU_1473	Bacteria	Marinimicrobia (SAR406 clade)	uncultured bacterium	uncultured bacterium	uncultured bacterium	uncultured bacterium	uncultured bacterium	1	9	12	0	1	1	0	1	0	0	0	0	0	3	38	0	1	2	0	0	0	0	4	0
OTU_1474	Bacteria	Proteobacteria	Gammaproteobacteria	Legionellales	Legionellaceae	Legionella	uncultured bacterium	0	0	10	0	0	5	0	0	0	0	0	3	0	0	0	0	0	0	0	1	0	0	0	0
OTU_1475	Bacteria	Proteobacteria	Gammaproteobacteria	Coxiellales	Coxiellaceae	Coxiella	Unclassified	0	0	0	0	0	1	0	2	0	0	0	0	0	4	0	0	0	0	0	0	0	0	0	0
OTU_1476	Bacteria	Chloroflexi	Dehalococcoidia	SAR202 clade	Unclassified	Unclassified	Unclassified	0	0	0	0	1	5	0	0	0	0	0	0	0	0	0	0	2	0	0	0	0	0	0	0
OTU_1477	Bacteria	Proteobacteria	Gammaproteobacteria	Steroidobacterales	Woeseiaceae	Woeseia	uncultured bacterium	0	0	1	0	1	2	0	0	0	0	0	0	0	0	0	1	4	1	0	0	0	0	0	0
OTU_1478	Bacteria	Firmicutes	Clostridia	Clostridiales	Family XI	Anaerococcus	uncultured bacterium	0	0	0	0	0	0	0	0	0	0	0	0	0	0	0	3	1	0	0	0	0	0	0	0
OTU_1479	Bacteria	Marinimicrobia (SAR406 clade)	Marinimicrobia bacterium SCGC AAA003-E22	Marinimicrobia bacterium SCGC AAA003-E22	Marinimicrobia bacterium SCGC AAA003-E22	Marinimicrobia bacterium SCGC AAA003-E22	Marinimicrobia bacterium SCGC AAA003-E22	0	2	1	0	0	0	0	0	0	0	0	0	0	2	0	0	0	0	0	0	0	0	0	0
OTU_148	Bacteria	Planctomycetes	Planctomycetacia	Planctomycetales	Gimesiaceae	uncultured	uncultured bacterium	0	0	4	0	0	0	0	29	49	0	0	0	0	0	1	0	0	0	0	43	31	0	0	0
OTU_1480	Bacteria	Proteobacteria	Deltaproteobacteria	Bdellovibrionales	Bdellovibrionaceae	OM27 clade	uncultured bacterium	0	0	0	0	0	1	0	0	4	0	0	2	0	0	1	0	0	0	0	0	2	0	0	0
OTU_1481	Bacteria	Verrucomicrobia	Verrucomicrobiae	Arctic97B-4 marine group	uncultured organism	uncultured organism	uncultured organism	0	1	12	2	3	21	0	0	0	0	0	0	0	1	5	1	2	6	0	0	0	0	0	0
OTU_1482	Bacteria	Proteobacteria	Deltaproteobacteria	SAR324 clade(Marine group B)	marine metagenome	marine metagenome	marine metagenome	0	13	512	21	30	72	0	11	881	0	14	3	0	31	808	52	39	88	1	25	36	43	45	0
OTU_1483	Bacteria	Planctomycetes	Planctomycetacia	Pirellulales	Pirellulaceae	Blastopirellula	uncultured planctomycete	0	0	0	0	0	0	1	1	0	0	0	0	0	0	0	0	0	0	7	0	0	0	0	0
OTU_1484	Bacteria	Bacteroidetes	Bacteroidia	Flavobacteriales	Flavobacteriaceae	uncultured	uncultured Flavobacteriaceae bacterium	0	0	0	0	0	0	0	0	0	0	0	0	0	0	0	0	0	0	4	0	0	0	0	0
OTU_1485	Bacteria	Bacteroidetes	Bacteroidia	Chitinophagales	Saprospiraceae	uncultured	uncultured marine bacterium	0	1	3	0	0	0	0	0	0	0	0	0	0	1	3	0	0	4	0	0	0	0	0	0
OTU_1486	Bacteria	Proteobacteria	Deltaproteobacteria	Bdellovibrionales	Bdellovibrionaceae	OM27 clade	uncultured marine bacterium	0	0	0	0	0	1	0	0	0	0	0	0	1	0	0	0	0	0	0	0	0	0	0	0
OTU_1487	Bacteria	Actinobacteria	Acidimicrobiia	Microtrichales	Microtrichaceae	Candidatus Microthrix	metagenome	0	0	0	0	0	0	0	0	0	0	0	0	0	0	0	0	0	0	0	0	15	0	0	0
OTU_1488	Bacteria	Proteobacteria	Alphaproteobacteria	SAR11 clade	uncultured	uncultured bacterium	uncultured bacterium	0	0	0	0	0	5	0	0	0	0	0	0	0	0	1	0	0	0	0	0	0	0	0	0
OTU_1489	Bacteria	Firmicutes	Bacilli	Lactobacillales	Carnobacteriaceae	Alkalibacterium	Unclassified	0	0	0	0	0	0	0	0	0	0	0	0	0	0	0	2	0	0	0	0	0	0	0	0
OTU_149	Bacteria	Proteobacteria	Alphaproteobacteria	Rhodospirillales	Magnetospiraceae	uncultured	uncultured alpha proteobacterium	0	0	0	0	14	8	0	0	10	5	2	1	0	0	4	2	6	31	0	0	3	6	5	0
OTU_1490	Bacteria	Planctomycetes	Phycisphaerae	Tepidisphaerales	WD2101 soil group	uncultured bacterium	uncultured bacterium	0	0	0	0	0	0	0	0	0	2	0	0	0	0	0	0	0	0	0	0	0	0	0	0
OTU_1491	Bacteria	Gemmatimonadetes	BD2-11 terrestrial group	uncultured bacterium	uncultured bacterium	uncultured bacterium	uncultured bacterium	0	0	4	0	0	2	0	0	0	0	0	0	0	1	9	6	4	0	0	0	0	0	0	0
OTU_1492	Bacteria	Proteobacteria	Deltaproteobacteria	Oligoflexales	Oligoflexaceae	uncultured	Unclassified	12	0	0	0	0	0	0	0	0	0	0	0	0	0	1	0	0	0	5	0	0	0	0	0
OTU_1493	Bacteria	Marinimicrobia (SAR406 clade)	Unclassified	Unclassified	Unclassified	Unclassified	Unclassified	0	0	0	0	0	0	0	0	0	0	0	0	0	4	0	0	0	0	0	0	0	0	0	0
OTU_1494	Bacteria	Cyanobacteria	Oxyphotobacteria	Synechococcales	Cyanobiaceae	Cyanobium PCC-6307	Synechococcus sp. Tous	0	0	0	0	0	0	0	0	0	0	0	0	0	2	0	0	0	0	0	0	0	0	0	0
OTU_1495	Bacteria	Proteobacteria	Alphaproteobacteria	Micavibrionales	Micavibrionaceae	uncultured	uncultured organism	0	0	0	0	1	0	0	0	0	0	0	0	0	0	0	0	0	5	0	0	0	0	0	0
OTU_1496	Bacteria	Kiritimatiellaeota	Kiritimatiellae	WCHB1-41	uncultured organism	uncultured organism	uncultured organism	0	0	0	0	0	0	0	0	2	4	0	0	0	0	0	0	0	0	0	0	5	1	0	0
OTU_1497	Bacteria	Chloroflexi	Dehalococcoidia	S085	uncultured bacterium	uncultured bacterium	uncultured bacterium	0	0	0	0	0	4	0	0	0	0	0	1	0	0	0	0	0	0	0	0	0	0	0	0
OTU_1498	Bacteria	Proteobacteria	Alphaproteobacteria	Rhizobiales	Methyloligellaceae	uncultured	uncultured Rhizobiales bacterium	0	0	0	0	0	0	0	0	0	0	0	0	0	0	0	0	0	0	0	0	0	0	0	2
OTU_15	Bacteria	Cyanobacteria	Oxyphotobacteria	Synechococcales	Cyanobiaceae	Prochlorococcus MIT9313	uncultured Prochlorococcus sp.	1572	36	147	14	75	128	172	169	218	21	3	19	1309	290	26	41	22	60	412	19	15	74	1093	0
OTU_150	Bacteria	Planctomycetes	028H05-P-BN-P5	uncultured planctomycete	uncultured planctomycete	uncultured planctomycete	uncultured planctomycete	0	0	0	0	2	1	0	1	0	7	5	8	0	0	0	0	0	1	0	5	6	2	34	0
OTU_1500	Bacteria	Planctomycetes	BD7-11	uncultured bacterium	uncultured bacterium	uncultured bacterium	uncultured bacterium	0	0	0	0	0	0	0	0	0	2	0	0	0	0	0	0	0	0	0	0	3	0	0	0
OTU_1501	Bacteria	Bacteroidetes	Bacteroidia	Flavobacteriales	Cryomorphaceae	uncultured	uncultured Owenweeksia sp.	0	0	0	0	0	0	0	0	3	0	0	0	0	2	1	0	0	0	0	3	0	0	0	0
OTU_1502	Bacteria	Marinimicrobia (SAR406 clade)	uncultured bacterium	uncultured bacterium	uncultured bacterium	uncultured bacterium	uncultured bacterium	0	0	7	0	0	0	0	0	0	0	0	0	0	0	1	0	0	0	0	0	0	0	0	0
OTU_1503	Bacteria	Proteobacteria	Gammaproteobacteria	Oceanospirillales	Oleiphilaceae	Oleiphilus	uncultured bacterium	0	0	0	0	0	0	0	6	0	0	0	0	0	0	0	0	0	0	1	0	0	0	0	0
OTU_1504	Bacteria	Proteobacteria	Deltaproteobacteria	Bdellovibrionales	Bdellovibrionaceae	OM27 clade	uncultured delta proteobacterium	0	2	0	0	0	0	0	1	0	0	0	0	0	0	0	0	0	0	0	2	0	0	0	0
OTU_1505	Bacteria	Proteobacteria	Deltaproteobacteria	NB1-j	uncultured bacterium	uncultured bacterium	uncultured bacterium	0	0	0	0	0	0	0	0	22	0	0	0	0	0	6	0	0	0	0	1	15	0	0	0
OTU_1506	Bacteria	Acidobacteria	Subgroup 6	uncultured bacterium KM4-9-H7	uncultured bacterium KM4-9-H7	uncultured bacterium KM4-9-H7	uncultured bacterium KM4-9-H7	0	3	2	0	0	0	0	0	0	0	0	0	0	0	0	0	0	0	0	0	0	0	0	0
OTU_1508	Bacteria	Lentisphaerae	Oligosphaeria	SS1-B-02-17	uncultured Lentisphaerae bacterium	uncultured Lentisphaerae bacterium	uncultured Lentisphaerae bacterium	0	0	0	0	0	0	0	0	4	0	0	0	0	0	1	0	0	0	0	0	7	0	0	0
OTU_1509	Bacteria	Planctomycetes	Planctomycetacia	Pirellulales	Pirellulaceae	Rhodopirellula	uncultured planctomycete	0	0	0	0	0	0	0	0	2	0	0	0	0	0	0	0	0	0	2	0	0	0	0	0
OTU_151	Bacteria	Proteobacteria	Gammaproteobacteria	Alteromonadales	Marinobacteraceae	Marinobacter	uncultured bacterium	1	0	3	1	6	5	0	4	6	4	38	36	0	0	4	4	9	20	0	9	40	48	90	49
OTU_1510	Bacteria	Chloroflexi	Dehalococcoidia	SAR202 clade	uncultured bacterium	uncultured bacterium	uncultured bacterium	0	1	0	0	0	0	0	0	0	0	0	0	0	0	2	0	0	0	0	0	0	0	0	0
OTU_1511	Bacteria	Proteobacteria	Deltaproteobacteria	NB1-j	uncultured bacterium	uncultured bacterium	uncultured bacterium	0	0	0	0	0	3	0	0	14	0	3	2	0	0	0	0	0	1	0	0	8	3	8	0
OTU_1512	Bacteria	Proteobacteria	Gammaproteobacteria	Pseudomonadales	Moraxellaceae	Enhydrobacter	uncultured Enhydrobacter sp.	0	0	0	0	2	1	0	0	0	0	0	2	0	0	1	0	0	0	0	3	10	0	1	0
OTU_1513	Bacteria	Planctomycetes	Planctomycetacia	Planctomycetales	Gimesiaceae	uncultured	uncultured bacterium	0	0	0	0	0	2	0	0	0	0	0	3	0	0	0	0	0	0	0	0	0	0	0	0
OTU_1514	Bacteria	Actinobacteria	Actinobacteria	Micrococcales	Micrococcaceae	Citricoccus	Unclassified	0	0	0	0	0	0	0	6	0	0	0	2	0	0	0	0	0	0	0	0	0	1	0	0
OTU_1515	Bacteria	Proteobacteria	Gammaproteobacteria	Steroidobacterales	Woeseiaceae	Woeseia	Unclassified	0	0	0	0	0	0	0	1	2	2	0	0	0	0	0	0	0	0	0	1	2	3	0	0
OTU_1516	Bacteria	Bacteroidetes	Bacteroidia	Flavobacteriales	Flavobacteriaceae	Aquibacter	uncultured bacterium	0	0	0	3	0	0	0	0	0	0	0	0	0	0	0	0	0	0	0	0	0	0	0	0
OTU_1517	Bacteria	Nitrospinae	Nitrospinia	Nitrospinales	Nitrospinaceae	Nitrospina	uncultured bacterium	0	0	8	0	0	0	0	0	10	0	0	0	0	0	11	0	0	0	0	0	24	0	0	0
OTU_1518	Bacteria	Planctomycetes	OM190	uncultured Planctomyces sp.	uncultured Planctomyces sp.	uncultured Planctomyces sp.	uncultured Planctomyces sp.	0	1	0	0	0	0	0	1	1	0	1	6	0	0	0	0	0	1	0	2	0	0	13	0
OTU_1519	Bacteria	Proteobacteria	Deltaproteobacteria	Myxococcales	P3OB-42	uncultured marine microorganism	uncultured marine microorganism	0	0	0	0	0	0	0	0	0	0	0	0	0	2	0	0	0	0	0	0	0	0	0	0
OTU_152	Bacteria	Planctomycetes	Phycisphaerae	Phycisphaerales	Phycisphaeraceae	SM1A02	marine metagenome	0	0	0	0	7	0	0	1	0	2	3	5	0	0	0	1	2	1	2	0	10	0	0	84
OTU_1520	Bacteria	Bacteroidetes	Bacteroidia	Flavobacteriales	Crocinitomicaceae	Crocinitomix	uncultured Crocinitomix sp.	0	1	0	0	1	3	0	0	0	0	0	2	0	0	0	0	0	0	0	0	0	0	0	0
OTU_1521	Bacteria	Firmicutes	Bacilli	Bacillales	Bacillaceae	Anoxybacillus	uncultured bacterium	0	0	0	0	0	0	0	0	0	0	0	0	0	0	0	0	0	0	0	0	0	5	0	0
OTU_1522	Bacteria	Chloroflexi	Dehalococcoidia	SAR202 clade	uncultured bacterium	uncultured bacterium	uncultured bacterium	0	0	0	0	0	0	0	0	0	0	0	0	0	0	1	0	0	2	0	0	0	0	0	0
OTU_1523	Bacteria	Patescibacteria	Parcubacteria	Candidatus Kaiserbacteria	Unclassified	Unclassified	Unclassified	0	0	0	0	0	0	0	0	0	0	0	0	0	0	0	0	0	6	0	0	0	0	0	0
OTU_1524	Bacteria	Margulisbacteria	marine metagenome	marine metagenome	marine metagenome	marine metagenome	marine metagenome	0	0	0	0	0	0	0	0	1	0	0	0	0	0	2	0	0	0	0	0	1	0	0	0
OTU_1525	Bacteria	Verrucomicrobia	Verrucomicrobiae	Arctic97B-4 marine group	uncultured bacterium	uncultured bacterium	uncultured bacterium	0	0	1	0	2	1	0	0	0	0	0	0	0	0	0	0	0	0	0	0	0	0	0	0
OTU_1526	Bacteria	Proteobacteria	Deltaproteobacteria	SAR324 clade(Marine group B)	marine metagenome	marine metagenome	marine metagenome	0	44	0	0	0	0	0	4	0	0	0	0	0	46	0	0	1	0	0	1	0	0	4	0
OTU_1527	Bacteria	Proteobacteria	Deltaproteobacteria	Oligoflexales	Oligoflexaceae	uncultured	Unclassified	0	0	0	0	0	0	0	0	0	0	0	0	0	0	1	2	0	0	0	0	0	12	0	0
OTU_1528	Bacteria	Marinimicrobia (SAR406 clade)	Marinimicrobia bacterium SCGC AAA003-E22	Marinimicrobia bacterium SCGC AAA003-E22	Marinimicrobia bacterium SCGC AAA003-E22	Marinimicrobia bacterium SCGC AAA003-E22	Marinimicrobia bacterium SCGC AAA003-E22	0	5	12	0	0	4	0	0	0	0	0	0	0	5	14	0	3	1	0	0	0	0	0	0
OTU_1529	Bacteria	Proteobacteria	Gammaproteobacteria	Gammaproteobacteria Incertae Sedis	Unknown Family	uncultured marine bacterium	uncultured marine bacterium	0	0	0	0	0	0	0	0	0	0	0	0	0	0	0	0	0	0	5	0	0	0	0	0
OTU_153	Bacteria	Proteobacteria	Alphaproteobacteria	Micavibrionales	uncultured	Unclassified	Unclassified	35	2	2	4	1	0	1	0	0	0	2	1	2	0	0	2	0	0	0	0	0	0	0	0
OTU_1530	Bacteria	Bacteroidetes	Bacteroidia	Flavobacteriales	Flavobacteriaceae	Pustulibacterium	Pustulibacterium marinum	0	0	0	18	0	0	0	0	0	2	0	0	0	0	0	0	0	0	0	0	0	0	0	0
OTU_1531	Bacteria	Actinobacteria	Acidimicrobiia	Microtrichales	Iamiaceae	Iamia	metagenome	0	0	0	0	0	0	0	0	0	0	0	0	0	0	0	0	0	0	0	0	3	0	0	0
OTU_1532	Bacteria	Bacteroidetes	Bacteroidia	Flavobacteriales	NS9 marine group	Unclassified	Unclassified	0	2	0	0	1	2	0	0	0	0	0	0	0	0	1	2	0	1	1	1	0	0	4	0
OTU_1533	Bacteria	Unclassified	Unclassified	Unclassified	Unclassified	Unclassified	Unclassified	0	1	0	0	0	0	0	10	0	0	0	0	0	0	0	0	0	0	0	7	1	0	0	0
OTU_1534	Bacteria	Proteobacteria	Deltaproteobacteria	Myxococcales	Nannocystaceae	uncultured	uncultured delta proteobacterium	0	0	0	0	0	0	0	0	0	0	0	0	0	0	0	0	0	0	13	2	0	0	2	0
OTU_1535	Bacteria	Proteobacteria	Alphaproteobacteria	Paracaedibacterales	Paracaedibacteraceae	uncultured	uncultured bacterium	0	0	2	0	0	0	0	0	2	0	0	0	0	0	0	0	0	0	0	0	0	0	0	0
OTU_1536	Bacteria	Proteobacteria	Gammaproteobacteria	SAR86 clade	uncultured SAR86 cluster bacterium	uncultured SAR86 cluster bacterium	uncultured SAR86 cluster bacterium	0	0	6	0	0	0	0	0	0	0	0	0	0	0	5	0	0	0	0	0	0	0	0	0
OTU_1537	Bacteria	Proteobacteria	Gammaproteobacteria	Unclassified	Unclassified	Unclassified	Unclassified	0	0	1	1	0	0	0	0	0	0	0	0	0	0	0	0	0	0	0	4	0	0	0	0
OTU_1538	Bacteria	Bacteroidetes	Bacteroidia	Chitinophagales	uncultured	uncultured Sphingobacteriales bacterium	uncultured Sphingobacteriales bacterium	0	0	0	0	0	0	0	0	0	0	0	0	0	0	0	0	0	0	0	2	0	0	0	0
OTU_1539	Bacteria	Nitrospinae	Nitrospinia	Nitrospinales	Nitrospinaceae	Nitrospina	Unclassified	0	0	0	0	0	0	0	0	0	0	0	0	0	2	0	0	0	0	0	0	0	0	0	0
OTU_154	Bacteria	Actinobacteria	Actinobacteria	Corynebacteriales	Mycobacteriaceae	Mycobacterium	uncultured bacterium	0	4	1	6	90	7	1	8	6	0	7	12	5	4	3	3	12	1	63	40	24	0	5	0
OTU_1540	Bacteria	Proteobacteria	Deltaproteobacteria	Bradymonadales	Unclassified	Unclassified	Unclassified	0	0	0	0	0	0	0	0	1	0	0	0	0	0	0	0	0	0	0	4	0	0	0	0
OTU_1541	Bacteria	Proteobacteria	Alphaproteobacteria	Unclassified	Unclassified	Unclassified	Unclassified	0	0	0	0	0	0	0	0	0	0	0	0	0	0	0	0	0	0	0	0	0	0	2	0
OTU_1542	Bacteria	Proteobacteria	Gammaproteobacteria	Coxiellales	Coxiellaceae	Coxiella	uncultured organism	0	0	0	0	0	0	0	0	0	0	0	0	0	0	0	0	0	2	0	0	0	4	0	0
OTU_1543	Bacteria	Bacteroidetes	Bacteroidia	Flavobacteriales	Cryomorphaceae	uncultured	Unclassified	0	0	0	0	0	0	0	0	0	0	0	0	0	0	0	0	0	0	5	0	0	0	0	0
OTU_1544	Bacteria	Planctomycetes	Planctomycetacia	Pirellulales	Pirellulaceae	Rhodopirellula	uncultured planctomycete	0	2	0	0	0	1	0	1	0	0	0	0	0	2	0	1	0	0	0	0	0	0	0	0
OTU_1546	Bacteria	Chloroflexi	Dehalococcoidia	SAR202 clade	Unclassified	Unclassified	Unclassified	0	0	3	0	0	1	0	0	0	0	0	0	0	0	9	1	2	4	0	0	0	0	0	0
OTU_1547	Bacteria	Proteobacteria	Gammaproteobacteria	Coxiellales	Coxiellaceae	Coxiella	uncultured marine bacterium	1	1	6	0	0	1	0	0	0	0	0	0	0	1	0	0	0	0	0	0	0	1	0	0
OTU_1548	Bacteria	Actinobacteria	KIST-JJY010	uncultured bacterium	uncultured bacterium	uncultured bacterium	uncultured bacterium	0	0	1	0	0	0	0	4	0	0	0	0	0	0	0	0	0	0	0	0	0	0	0	0
OTU_1549	Bacteria	Proteobacteria	Alphaproteobacteria	Parvibaculales	Parvibaculaceae	uncultured	uncultured alpha proteobacterium	2	0	0	0	0	1	0	0	2	0	0	0	0	0	0	0	0	0	0	0	0	0	0	0
OTU_155	Bacteria	Nitrospinae	Nitrospinia	Nitrospinales	Nitrospinaceae	LS-NOB	uncultured marine microorganism	0	290	3	0	0	1	0	4	0	0	0	0	0	137	0	0	0	0	0	9	0	0	0	0
OTU_1550	Bacteria	Bacteroidetes	Bacteroidia	Bacteroidales	Bacteroidaceae	Bacteroides	Bacteroides ovatus V975	0	0	0	0	0	0	0	0	0	6	0	0	0	0	0	0	0	0	0	3	0	0	0	0
OTU_1551	Bacteria	Proteobacteria	Gammaproteobacteria	Thiomicrospirales	Thioglobaceae	SUP05 cluster	uncultured gamma proteobacterium	0	3	0	0	0	4	0	0	0	0	0	0	0	0	0	0	0	2	0	0	0	0	0	0
OTU_1552	Bacteria	Deinococcus-Thermus	Deinococci	Deinococcales	Trueperaceae	Truepera	uncultured endolithic bacterium	0	0	0	0	0	0	0	0	1	0	0	0	0	0	0	0	0	0	0	0	6	0	0	0
OTU_1553	Bacteria	Acidobacteria	Subgroup 6	uncultured bacterium KM4-9-H7	uncultured bacterium KM4-9-H7	uncultured bacterium KM4-9-H7	uncultured bacterium KM4-9-H7	0	0	3	0	0	1	0	0	0	0	0	0	0	0	0	0	0	0	0	0	0	0	0	0
OTU_1554	Bacteria	Proteobacteria	Deltaproteobacteria	Myxococcales	Haliangiaceae	Haliangium	Unclassified	0	0	0	0	0	0	0	0	0	0	0	0	0	0	0	0	0	0	0	0	0	3	2	0
OTU_1555	Bacteria	Bacteroidetes	Bacteroidia	Flavobacteriales	Cryomorphaceae	uncultured	uncultured Owenweeksia sp.	5	0	0	0	0	0	0	3	0	0	0	0	4	7	0	0	0	0	0	0	0	0	10	0
OTU_1556	Bacteria	Proteobacteria	Alphaproteobacteria	Unclassified	Unclassified	Unclassified	Unclassified	0	0	0	0	0	0	0	0	0	0	0	0	0	0	0	0	0	0	0	2	0	0	0	0
OTU_1557	Bacteria	Firmicutes	Clostridia	Clostridiales	Family XI	Peptoniphilus	unidentified	0	0	0	0	0	0	0	0	0	0	0	0	0	0	0	0	6	0	7	2	0	0	0	0
OTU_1558	Bacteria	Actinobacteria	Actinobacteria	Micrococcales	Microbacteriaceae	Microcella	Microcella alkaliphila	0	0	2	0	0	1	0	0	0	0	0	0	0	0	0	0	0	0	0	0	4	0	3	0
OTU_1559	Bacteria	Chloroflexi	Dehalococcoidia	SAR202 clade	uncultured sediment bacterium	uncultured sediment bacterium	uncultured sediment bacterium	0	0	0	0	0	0	0	0	0	0	0	0	0	0	0	0	2	0	0	0	0	0	0	0
OTU_156	Bacteria	Proteobacteria	Alphaproteobacteria	Unclassified	Unclassified	Unclassified	Unclassified	0	0	2	0	3	0	0	0	0	0	0	0	0	1	7	3	0	1	0	0	25	0	0	0
OTU_1560	Bacteria	Bacteroidetes	Bacteroidia	Bacteroidales	Bacteroidaceae	Bacteroides	uncultured bacterium	0	0	0	0	0	0	0	0	0	0	3	2	0	0	0	0	0	0	2	0	0	0	0	0
OTU_1561	Bacteria	Proteobacteria	Gammaproteobacteria	Coxiellales	Coxiellaceae	Coxiella	uncultured Legionella sp.	0	1	0	0	0	0	0	3	0	0	0	0	0	0	0	1	0	0	0	0	0	0	0	0
OTU_1562	Bacteria	Firmicutes	Clostridia	Clostridiales	Family XI	Finegoldia	Finegoldia magna	1	0	0	0	0	0	0	0	3	2	0	0	0	0	0	4	22	0	0	0	0	1	0	0
OTU_1563	Bacteria	Proteobacteria	Deltaproteobacteria	Bdellovibrionales	Bdellovibrionaceae	OM27 clade	uncultured bacterium	0	1	0	0	0	4	0	0	0	0	0	0	0	3	7	0	0	1	0	0	2	0	0	0
OTU_1564	Bacteria	Firmicutes	Bacilli	Bacillales	Planococcaceae	Lysinibacillus	Lysinibacillus sp. FFL6	0	0	0	0	0	0	0	0	0	0	0	0	0	0	0	0	0	0	0	0	9	0	0	0
OTU_1565	Bacteria	Bacteroidetes	Bacteroidia	Flavobacteriales	Flavobacteriaceae	Muricauda	Unclassified	0	0	0	0	0	0	0	0	12	0	0	0	1	0	0	0	0	0	12	1	1	0	0	0
OTU_1566	Bacteria	Proteobacteria	Deltaproteobacteria	Bdellovibrionales	Bdellovibrionaceae	OM27 clade	uncultured bacterium	0	2	0	0	0	0	0	0	1	0	0	0	0	0	0	0	1	4	0	0	4	0	2	0
OTU_1567	Bacteria	Proteobacteria	Gammaproteobacteria	Oceanospirillales	Alcanivoracaceae	Alcanivorax	uncultured gamma proteobacterium	0	0	0	0	0	0	0	0	0	0	0	0	0	0	0	0	0	0	0	0	6	0	1	0
OTU_1568	Bacteria	Proteobacteria	Deltaproteobacteria	NB1-j	uncultured bacterium	uncultured bacterium	uncultured bacterium	0	0	0	0	0	0	0	0	0	0	0	0	0	0	0	0	0	0	0	0	0	1	7	0
OTU_1569	Bacteria	Proteobacteria	Deltaproteobacteria	Bradymonadales	uncultured delta proteobacterium	uncultured delta proteobacterium	uncultured delta proteobacterium	0	0	0	0	0	0	0	0	2	3	1	0	0	0	0	0	0	0	0	0	9	8	2	0
OTU_157	Bacteria	Actinobacteria	Acidimicrobiia	Microtrichales	Microtrichaceae	Sva0996 marine group	uncultured marine bacterium	1	156	4	1	1	12	21	1	0	0	0	0	117	47	0	1	0	1	15	0	0	4	48	0
OTU_1571	Bacteria	Marinimicrobia (SAR406 clade)	uncultured bacterium	uncultured bacterium	uncultured bacterium	uncultured bacterium	uncultured bacterium	0	0	0	0	0	2	0	0	0	0	0	0	0	0	0	0	1	0	0	0	0	0	0	0
OTU_1572	Bacteria	Planctomycetes	Phycisphaerae	Phycisphaerales	Phycisphaeraceae	Urania-1B-19 marine sediment group	Unclassified	0	0	0	0	0	0	0	1	0	0	1	0	0	0	0	0	0	1	0	1	0	0	5	0
OTU_1573	Bacteria	Proteobacteria	Deltaproteobacteria	PB19	uncultured bacterium HF0010_08B07	uncultured bacterium HF0010_08B07	uncultured bacterium HF0010_08B07	0	0	0	0	0	0	0	0	0	0	0	0	0	0	0	0	0	0	5	0	0	0	3	0
OTU_1574	Bacteria	Proteobacteria	Deltaproteobacteria	Unclassified	Unclassified	Unclassified	Unclassified	0	0	0	0	0	0	0	0	0	0	0	0	0	0	0	0	0	0	0	4	0	0	0	0
OTU_1575	Bacteria	Marinimicrobia (SAR406 clade)	uncultured bacterium	uncultured bacterium	uncultured bacterium	uncultured bacterium	uncultured bacterium	0	1	13	2	2	14	0	0	0	0	0	0	0	2	37	2	3	19	0	3	0	0	0	0
OTU_1577	Bacteria	Proteobacteria	Gammaproteobacteria	Coxiellales	Coxiellaceae	Coxiella	uncultured bacterium	0	0	2	0	0	0	0	0	4	0	0	0	1	0	0	0	0	0	3	3	4	0	1	0
OTU_1579	Bacteria	Gemmatimonadetes	BD2-11 terrestrial group	uncultured Gemmatimonadales bacterium HF0200_36I24	uncultured Gemmatimonadales bacterium HF0200_36I24	uncultured Gemmatimonadales bacterium HF0200_36I24	uncultured Gemmatimonadales bacterium HF0200_36I24	0	0	0	0	0	0	0	0	0	0	0	0	0	0	0	0	0	0	0	6	0	0	0	0
OTU_158	Bacteria	Proteobacteria	Alphaproteobacteria	Sneathiellales	Sneathiellaceae	AT-s3-44	uncultured bacterium	0	32	57	5	23	49	0	0	0	0	0	0	0	22	90	11	11	30	0	2	0	5	8	0
OTU_1580	Bacteria	Actinobacteria	Acidimicrobiia	Actinomarinales	uncultured	Unclassified	Unclassified	0	0	0	0	0	0	0	0	0	0	0	0	0	0	0	1	0	3	0	0	0	0	0	0
OTU_1582	Bacteria	Proteobacteria	Gammaproteobacteria	Betaproteobacteriales	Burkholderiaceae	Tepidicella	uncultured Burkholderiales bacterium	0	0	0	0	0	0	0	0	0	0	0	0	0	0	1	0	0	0	0	0	0	7	0	0
OTU_1583	Bacteria	Planctomycetes	OM190	marine metagenome	marine metagenome	marine metagenome	marine metagenome	0	0	4	0	0	0	0	0	0	0	0	0	0	0	5	1	0	0	0	0	0	0	0	0
OTU_1584	Bacteria	Proteobacteria	Deltaproteobacteria	Bdellovibrionales	Bdellovibrionaceae	OM27 clade	uncultured marine bacterium	0	3	0	0	0	0	0	0	0	0	0	0	0	0	0	0	0	0	0	0	2	0	0	0
OTU_1585	Bacteria	Proteobacteria	Gammaproteobacteria	Oceanospirillales	SS1-B-06-26	Unclassified	Unclassified	0	0	3	0	1	5	0	0	5	0	0	5	0	0	0	0	0	0	0	2	0	1	1	0
OTU_1586	Bacteria	Firmicutes	Bacilli	Bacillales	Bacillaceae	Bacillus	Unclassified	0	0	0	0	0	0	0	1	0	0	0	0	0	0	0	0	0	0	9	0	0	0	0	0
OTU_1587	Bacteria	Firmicutes	Bacilli	Bacillales	Staphylococcaceae	Staphylococcus	Staphylococcus haemolyticus	0	0	0	2	1	1	0	0	0	1	0	2	0	0	0	0	1	0	0	0	3	1	2	0
OTU_1588	Bacteria	Proteobacteria	Deltaproteobacteria	Bradymonadales	uncultured marine bacterium	uncultured marine bacterium	uncultured marine bacterium	0	1	0	0	0	0	0	3	0	0	0	0	0	3	0	0	0	0	0	3	1	0	0	0
OTU_1589	Bacteria	Proteobacteria	Alphaproteobacteria	Thalassobaculales	Nisaeaceae	Nisaea	uncultured bacterium	0	0	0	0	0	0	0	0	0	0	0	0	0	0	0	0	0	0	5	0	0	0	1	0
OTU_159	Bacteria	Proteobacteria	Alphaproteobacteria	Rhizobiales	Unclassified	Unclassified	Unclassified	0	0	0	1	1	14	0	0	0	0	0	0	0	0	3	6	1	37	0	0	0	0	0	0
OTU_1591	Bacteria	Proteobacteria	Gammaproteobacteria	SAR86 clade	uncultured marine bacterium 311	uncultured marine bacterium 311	uncultured marine bacterium 311	0	0	2	0	0	2	0	0	0	0	0	0	0	0	1	2	1	4	0	0	0	0	0	0
OTU_1592	Bacteria	Proteobacteria	Alphaproteobacteria	Caulobacterales	Hyphomonadaceae	Ponticaulis	Ponticaulis koreensis DSM 19734	0	0	0	1	0	2	0	0	0	0	0	0	0	0	1	0	4	4	0	0	0	0	1	4
OTU_1593	Bacteria	Proteobacteria	Alphaproteobacteria	Unclassified	Unclassified	Unclassified	Unclassified	4	0	0	0	0	0	0	0	0	0	0	0	2	0	0	0	0	0	0	0	0	0	0	0
OTU_1594	Bacteria	Firmicutes	Clostridia	Clostridiales	Family XI	Ezakiella	Tissierellia bacterium S7-1-4	0	0	0	0	0	0	0	0	0	0	0	0	0	0	0	2	17	0	0	0	3	0	0	0
OTU_1595	Bacteria	Marinimicrobia (SAR406 clade)	uncultured bacterium	uncultured bacterium	uncultured bacterium	uncultured bacterium	uncultured bacterium	0	0	1	1	16	11	0	0	0	0	0	0	0	0	2	3	4	4	0	0	0	0	0	0
OTU_1596	Bacteria	Proteobacteria	Alphaproteobacteria	Rickettsiales	Rickettsiaceae	Rickettsia	uncultured Rickettsia sp.	0	0	0	0	0	0	0	0	0	0	0	1	0	0	0	0	0	0	1	0	0	1	0	0
OTU_1597	Bacteria	Proteobacteria	Gammaproteobacteria	Alteromonadales	Moritellaceae	Moritella	Moritella sp. 5710	0	0	0	0	0	1	0	0	6	0	0	0	0	0	0	1	0	0	0	0	9	1	6	0
OTU_1598	Bacteria	Marinimicrobia (SAR406 clade)	Marinimicrobia bacterium SCGC AAA003-E22	Marinimicrobia bacterium SCGC AAA003-E22	Marinimicrobia bacterium SCGC AAA003-E22	Marinimicrobia bacterium SCGC AAA003-E22	Marinimicrobia bacterium SCGC AAA003-E22	0	8	4	0	0	0	0	0	1	0	0	0	0	5	8	1	0	0	0	0	0	0	0	0
OTU_1599	Bacteria	Proteobacteria	Gammaproteobacteria	Oceanospirillales	Pseudohongiellaceae	Pseudohongiella	marine metagenome	2	0	0	0	0	0	0	0	0	0	0	0	0	0	0	0	0	0	6	0	0	1	0	0
OTU_16	Bacteria	Proteobacteria	Alphaproteobacteria	Rhodobacterales	Rhodobacteraceae	Loktanella	uncultured alpha proteobacterium	12	26	15	327	156	2	15	8	12	0	1	1	10	0	0	3	22	13	52	8	15	9	6	1
OTU_160	Bacteria	Proteobacteria	Deltaproteobacteria	Bdellovibrionales	Bdellovibrionaceae	OM27 clade	uncultured delta proteobacterium	0	0	1	0	0	1	0	2	21	0	0	0	0	0	0	0	1	1	1	5	22	0	7	0
OTU_1600	Bacteria	Actinobacteria	Rubrobacteria	Rubrobacterales	Rubrobacteriaceae	Rubrobacter	metagenome	0	0	0	0	0	0	0	0	0	3	0	0	0	0	0	0	0	0	0	0	0	0	0	0
OTU_1601	Bacteria	Planctomycetes	Planctomycetacia	Pirellulales	Pirellulaceae	Rhodopirellula	uncultured sediment bacterium	0	0	0	0	0	2	0	0	0	0	0	0	0	0	0	0	0	3	0	0	0	0	0	0
OTU_1602	Bacteria	Proteobacteria	Deltaproteobacteria	Bdellovibrionales	Bacteriovoracaceae	uncultured	uncultured bacterium	11	0	0	0	0	1	0	0	0	0	0	0	0	0	0	0	0	0	0	0	0	0	0	0
OTU_1603	Bacteria	Proteobacteria	Alphaproteobacteria	Paracaedibacterales	Paracaedibacteraceae	Unclassified	Unclassified	0	0	0	0	0	0	0	0	2	0	0	0	0	0	0	0	0	0	0	0	0	0	0	0
OTU_1604	Bacteria	Proteobacteria	Gammaproteobacteria	Oceanospirillales	Saccharospirillaceae	Bermanella	uncultured bacterium	0	1	0	0	0	0	0	4	2	0	0	0	0	0	0	0	0	0	0	0	0	0	0	0
OTU_1605	Bacteria	Firmicutes	Bacilli	Bacillales	Bacillaceae	Geobacillus	Unclassified	0	0	0	0	0	0	0	0	0	0	0	0	0	0	0	0	0	0	0	0	0	0	5	0
OTU_1606	Bacteria	BRC1	Unclassified	Unclassified	Unclassified	Unclassified	Unclassified	0	0	0	0	0	0	0	0	2	0	0	0	0	0	0	0	0	0	0	0	1	0	0	0
OTU_1607	Bacteria	Marinimicrobia (SAR406 clade)	Unclassified	Unclassified	Unclassified	Unclassified	Unclassified	0	4	14	0	0	0	0	0	0	0	0	0	0	2	1	0	0	0	0	0	0	0	0	0
OTU_1608	Bacteria	Chloroflexi	Dehalococcoidia	SAR202 clade	uncultured deep-sea bacterium	uncultured deep-sea bacterium	uncultured deep-sea bacterium	0	0	0	0	1	5	0	0	0	0	0	0	0	0	0	0	2	1	0	0	0	0	0	0
OTU_161	Bacteria	Planctomycetes	Phycisphaerae	Phycisphaerales	Phycisphaeraceae	FS140-16B-02 marine group	Unclassified	0	10	2	6	2	4	0	1	5	0	2	0	0	1	0	0	0	19	8	0	8	7	6	0
OTU_1611	Bacteria	Acidobacteria	Acidobacteriia	Solibacterales	Solibacteraceae (Subgroup 3)	PAUC26f	uncultured bacterium	0	0	0	2	0	0	0	0	0	0	0	0	0	0	0	0	0	0	0	0	0	0	0	0
OTU_1612	Bacteria	Actinobacteria	Actinobacteria	Micrococcales	Micrococcaceae	Rothia	Rothia mucilaginosa	0	0	0	3	1	0	0	0	0	2	0	0	0	0	0	0	0	0	0	0	0	0	0	0
OTU_1613	Bacteria	Planctomycetes	Pla3 lineage	hydrothermal vent metagenome	hydrothermal vent metagenome	hydrothermal vent metagenome	hydrothermal vent metagenome	0	0	0	0	0	0	0	0	2	0	0	0	0	0	0	0	0	0	0	0	0	0	4	0
OTU_1614	Bacteria	Bacteroidetes	Bacteroidia	Flavobacteriales	Flavobacteriaceae	Arenibacter	Arenibacter algicola	0	0	0	0	0	0	0	0	0	0	0	0	0	0	0	0	0	0	0	0	5	0	0	5
OTU_1615	Bacteria	Proteobacteria	Gammaproteobacteria	Coxiellales	Coxiellaceae	Coxiella	uncultured marine bacterium	13	2	0	0	0	0	0	0	1	0	0	0	0	0	3	0	0	0	0	0	0	0	0	0
OTU_1616	Bacteria	Proteobacteria	Alphaproteobacteria	Rhizobiales	Rhizobiaceae	Pseudahrensia	uncultured bacterium	0	0	0	0	0	0	0	0	0	2	0	0	0	0	0	0	0	0	0	1	0	0	0	0
OTU_1617	Bacteria	Proteobacteria	Gammaproteobacteria	Coxiellales	Coxiellaceae	Coxiella	uncultured bacterium	4	0	0	0	0	0	0	0	0	0	0	0	0	0	0	0	0	0	0	0	0	0	0	0
OTU_1619	Bacteria	Planctomycetes	OM190	uncultured Planctomyces sp.	uncultured Planctomyces sp.	uncultured Planctomyces sp.	uncultured Planctomyces sp.	0	0	0	0	0	0	0	0	0	0	0	3	0	0	0	0	0	0	0	0	0	0	0	0
OTU_162	Bacteria	Bacteroidetes	Bacteroidia	Flavobacteriales	Flavobacteriaceae	Salegentibacter	uncultured Salegentibacter sp.	0	0	0	124	54	4	0	1	0	6	39	60	0	1	0	7	0	6	0	0	10	0	1	0
OTU_1620	Bacteria	Proteobacteria	Gammaproteobacteria	Coxiellales	Coxiellaceae	Coxiella	uncultured gamma proteobacterium	0	2	0	2	0	0	0	0	0	0	0	0	0	1	1	0	0	0	0	0	4	0	0	0
OTU_1622	Bacteria	Proteobacteria	Unclassified	Unclassified	Unclassified	Unclassified	Unclassified	0	0	0	0	0	0	0	0	0	0	0	0	0	0	0	0	0	0	5	0	0	0	0	0
OTU_1623	Bacteria	Proteobacteria	Deltaproteobacteria	NB1-j	uncultured delta proteobacterium	uncultured delta proteobacterium	uncultured delta proteobacterium	0	0	0	0	0	0	0	0	0	0	0	0	0	0	0	0	0	0	4	0	0	0	0	0
OTU_1624	Bacteria	Chloroflexi	Dehalococcoidia	SAR202 clade	uncultured Chloroflexi bacterium	uncultured Chloroflexi bacterium	uncultured Chloroflexi bacterium	0	0	0	0	0	2	0	0	0	0	0	0	0	0	0	0	0	3	0	0	0	0	0	0
OTU_1625	Bacteria	Acidobacteria	Subgroup 21	uncultured bacterium	uncultured bacterium	uncultured bacterium	uncultured bacterium	0	3	0	0	0	0	0	0	0	0	0	0	0	5	0	0	0	0	0	0	0	0	0	0
OTU_1626	Bacteria	Proteobacteria	Deltaproteobacteria	Myxococcales	Eel-36e1D6	uncultured delta proteobacterium	uncultured delta proteobacterium	0	1	1	0	0	0	0	0	0	0	0	0	0	0	1	1	0	0	0	6	0	0	0	0
OTU_1627	Bacteria	Planctomycetes	Pla4 lineage	uncultured bacterium	uncultured bacterium	uncultured bacterium	uncultured bacterium	0	0	2	0	0	1	0	0	0	0	0	0	0	0	0	0	0	2	0	0	0	0	0	0
OTU_1628	Bacteria	Proteobacteria	Gammaproteobacteria	Coxiellales	Coxiellaceae	Coxiella	metagenome	0	0	0	0	0	0	0	2	0	0	0	0	0	5	0	0	0	0	0	0	0	0	0	0
OTU_1629	Bacteria	Proteobacteria	Gammaproteobacteria	Coxiellales	Coxiellaceae	Coxiella	uncultured marine bacterium	0	0	1	0	0	0	0	3	0	0	0	0	0	0	4	4	3	0	0	0	0	0	0	0
OTU_163	Bacteria	Planctomycetes	Planctomycetacia	Pirellulales	Pirellulaceae	uncultured	uncultured organism	8	1	19	12	30	7	5	23	40	5	0	0	1	3	5	21	8	7	8	17	34	6	10	0
OTU_1630	Bacteria	Proteobacteria	Deltaproteobacteria	Unclassified	Unclassified	Unclassified	Unclassified	0	0	0	0	0	0	0	2	2	0	0	0	0	0	0	0	0	0	0	0	6	0	1	0
OTU_1631	Bacteria	Proteobacteria	Unclassified	Unclassified	Unclassified	Unclassified	Unclassified	0	0	0	0	0	0	0	0	3	0	0	0	0	0	0	0	0	0	1	0	0	0	0	0
OTU_1632	Bacteria	Proteobacteria	Deltaproteobacteria	Bdellovibrionales	Bdellovibrionaceae	OM27 clade	uncultured delta proteobacterium	0	0	2	0	1	0	0	0	1	0	0	0	0	0	0	0	0	0	0	0	3	0	1	0
OTU_1633	Bacteria	Marinimicrobia (SAR406 clade)	marine metagenome	marine metagenome	marine metagenome	marine metagenome	marine metagenome	8	0	0	0	0	0	0	0	0	0	0	0	0	0	0	0	0	0	0	0	0	0	16	0
OTU_1634	Bacteria	Planctomycetes	Phycisphaerae	Phycisphaerales	Phycisphaeraceae	uncultured	Unclassified	0	0	0	0	0	1	0	0	0	0	0	0	0	0	0	0	0	0	0	0	0	0	2	0
OTU_1635	Bacteria	Patescibacteria	ABY1	Candidatus Kuenenbacteria	uncultured bacterium	uncultured bacterium	uncultured bacterium	0	0	0	0	0	0	0	0	4	0	0	0	0	0	2	0	0	0	0	0	1	0	0	0
OTU_1636	Bacteria	Bacteroidetes	Bacteroidia	Flavobacteriales	Cryomorphaceae	NS10 marine group	uncultured marine bacterium	0	0	0	0	0	0	0	0	2	0	0	0	0	0	0	0	0	0	2	0	0	0	3	0
OTU_1637	Bacteria	Proteobacteria	Deltaproteobacteria	Myxococcales	Unclassified	Unclassified	Unclassified	0	0	0	0	0	0	0	0	0	0	0	0	0	4	0	0	0	0	0	0	0	0	0	0
OTU_1638	Bacteria	Marinimicrobia (SAR406 clade)	uncultured bacterium	uncultured bacterium	uncultured bacterium	uncultured bacterium	uncultured bacterium	0	0	0	0	0	0	0	0	0	0	0	0	0	0	0	0	0	0	1	0	0	0	7	0
OTU_1639	Bacteria	Proteobacteria	Alphaproteobacteria	Paracaedibacterales	Paracaedibacteraceae	Candidatus Finniella	uncultured alpha proteobacterium	0	0	0	0	0	0	0	0	0	0	0	0	0	0	0	0	0	0	2	0	0	0	0	0
OTU_164	Bacteria	Bacteroidetes	Bacteroidia	Flavobacteriales	Flavobacteriaceae	NS2b marine group	uncultured marine bacterium	6	1	0	1	0	1	32	9	4	0	0	0	55	3	0	2	1	0	56	0	1	2	32	0
OTU_1640	Bacteria	Nitrospinae	Nitrospinia	Nitrospinales	Nitrospinaceae	Nitrospina	Unclassified	0	1	0	0	0	0	0	0	0	0	0	0	0	4	0	0	0	0	0	0	0	0	0	0
OTU_1641	Bacteria	Marinimicrobia (SAR406 clade)	uncultured marine microorganism	uncultured marine microorganism	uncultured marine microorganism	uncultured marine microorganism	uncultured marine microorganism	0	0	5	1	2	0	0	0	0	0	0	0	0	0	1	0	0	0	0	0	0	0	0	0
OTU_1642	Bacteria	Proteobacteria	Alphaproteobacteria	Rickettsiales	AB1	Sinorickettsia chlamys	Sinorickettsia chlamys	0	0	0	0	0	4	0	0	0	0	0	0	0	0	0	2	3	1	0	0	0	0	1	1
OTU_1643	Bacteria	Chloroflexi	TK10	marine metagenome	marine metagenome	marine metagenome	marine metagenome	0	0	1	0	2	0	0	0	0	0	0	0	0	0	1	1	0	0	0	0	0	0	0	0
OTU_1644	Bacteria	Bacteroidetes	Bacteroidia	Chitinophagales	Saprospiraceae	uncultured	uncultured marine microorganism	0	0	0	0	0	0	0	0	0	0	0	0	0	3	0	0	0	0	8	0	0	0	0	0
OTU_1645	Bacteria	Marinimicrobia (SAR406 clade)	uncultured marine microorganism	uncultured marine microorganism	uncultured marine microorganism	uncultured marine microorganism	uncultured marine microorganism	0	0	3	0	0	0	0	0	1	0	0	0	0	0	0	0	0	0	0	0	0	0	0	0
OTU_1646	Bacteria	Chloroflexi	Anaerolineae	Anaerolineales	Anaerolineaceae	uncultured	marine metagenome	0	0	0	0	0	0	0	0	0	0	0	0	0	0	0	0	0	3	0	0	0	0	0	0
OTU_1647	Bacteria	Verrucomicrobia	Verrucomicrobiae	Opitutales	Puniceicoccaceae	MB11C04 marine group	marine metagenome	0	0	0	0	0	0	0	1	0	0	0	1	0	0	0	0	0	0	0	0	0	0	0	0
OTU_1648	Bacteria	Actinobacteria	Acidimicrobiia	Actinomarinales	Actinomarinaceae	Candidatus Actinomarina	uncultured bacterium	0	18	0	0	0	0	2	0	0	0	0	0	0	4	0	0	0	0	0	1	0	0	0	0
OTU_1649	Bacteria	Acidobacteria	Subgroup 6	uncultured bacterium	uncultured bacterium	uncultured bacterium	uncultured bacterium	0	0	0	0	0	0	0	0	0	0	0	0	0	0	1	1	0	0	0	0	3	0	0	0
OTU_165	Bacteria	Planctomycetes	Phycisphaerae	Phycisphaerales	Phycisphaeraceae	Urania-1B-19 marine sediment group	uncultured bacterium	0	0	0	0	0	0	0	12	3	0	0	0	0	1	0	0	0	0	0	44	0	0	0	0
OTU_1650	Bacteria	Proteobacteria	Gammaproteobacteria	Coxiellales	Coxiellaceae	Coxiella	Unclassified	0	0	0	0	0	0	0	0	0	0	0	0	0	0	2	0	0	0	0	0	0	0	0	0
OTU_1651	Bacteria	Marinimicrobia (SAR406 clade)	marine metagenome	marine metagenome	marine metagenome	marine metagenome	marine metagenome	9	0	0	0	0	0	0	2	2	0	0	0	0	0	0	0	0	0	0	0	0	1	9	0
OTU_1652	Bacteria	Acidobacteria	Acidobacteriia	Solibacterales	Solibacteraceae (Subgroup 3)	PAUC26f	uncultured bacterium	0	0	2	0	0	0	0	0	0	0	0	0	0	0	0	0	3	1	0	0	0	0	0	0
OTU_1653	Bacteria	Proteobacteria	Alphaproteobacteria	Rhizobiales	Lutibaculaceae	Lutibaculum	Lutibaculum baratangense AMV1	0	1	0	0	0	0	0	0	1	0	0	0	1	0	0	0	0	0	7	0	0	0	0	0
OTU_1654	Bacteria	Actinobacteria	Actinobacteria	Corynebacteriales	Corynebacteriaceae	Corynebacterium 1	Corynebacterium casei	0	0	0	0	0	0	0	0	0	0	0	0	0	0	0	0	0	0	2	0	0	0	0	0
OTU_1655	Bacteria	Proteobacteria	Gammaproteobacteria	Coxiellales	Coxiellaceae	Coxiella	uncultured gamma proteobacterium KTc0924	3	0	0	0	0	0	0	0	0	0	0	0	5	0	0	0	0	0	0	0	0	0	0	0
OTU_1656	Bacteria	Marinimicrobia (SAR406 clade)	uncultured marine bacterium	uncultured marine bacterium	uncultured marine bacterium	uncultured marine bacterium	uncultured marine bacterium	15	1	2	0	1	2	3	0	0	0	0	0	7	0	2	1	0	0	7	0	0	0	0	0
OTU_1658	Bacteria	Tenericutes	Mollicutes	Acholeplasmatales	Acholeplasmataceae	Acholeplasma	bioreactor metagenome	0	0	0	0	0	0	0	0	0	0	0	0	0	0	0	0	0	0	0	0	3	0	4	0
OTU_1659	Bacteria	Proteobacteria	Gammaproteobacteria	Coxiellales	Coxiellaceae	Coxiella	uncultured Legionellales bacterium	7	0	0	0	0	0	0	1	0	0	0	0	0	0	0	0	0	0	0	0	0	0	0	0
OTU_166	Bacteria	Proteobacteria	Alphaproteobacteria	Sphingomonadales	Sphingomonadaceae	Novosphingobium	uncultured Sphingomonadales bacterium	1	2	1	1	3	24	1	3	1	1	0	3	0	1	0	2	0	22	2	8	0	0	1	0
OTU_1660	Bacteria	Gemmatimonadetes	BD2-11 terrestrial group	Gemmatimonadetes bacterium SCGC AAA240-J22	Gemmatimonadetes bacterium SCGC AAA240-J22	Gemmatimonadetes bacterium SCGC AAA240-J22	Gemmatimonadetes bacterium SCGC AAA240-J22	0	27	14	8	1	2	0	0	0	0	0	0	0	19	13	13	0	2	0	0	1	0	0	0
OTU_1661	Bacteria	Marinimicrobia (SAR406 clade)	uncultured bacterium	uncultured bacterium	uncultured bacterium	uncultured bacterium	uncultured bacterium	9	1	0	0	0	0	0	0	1	0	0	0	3	1	0	0	0	1	0	0	0	0	4	0
OTU_1662	Bacteria	Actinobacteria	Acidimicrobiia	Actinomarinales	uncultured	uncultured bacterium	uncultured bacterium	0	0	0	0	0	1	0	0	0	0	0	1	0	0	0	0	0	0	0	0	0	0	3	0
OTU_1663	Bacteria	Bacteroidetes	Bacteroidia	Flavobacteriales	NS9 marine group	uncultured Flavobacteriia bacterium	uncultured Flavobacteriia bacterium	4	0	0	0	0	0	0	1	0	0	0	0	0	0	0	0	0	0	0	0	0	0	0	0
OTU_1664	Bacteria	Cyanobacteria	Oxyphotobacteria	Nostocales	Xenococcaceae	Pleurocapsa PCC-7319	Stanieria sp. PCC 7301	0	0	0	0	0	0	0	0	0	0	0	2	0	0	0	0	0	0	0	0	0	0	0	0
OTU_1665	Bacteria	Unclassified	Unclassified	Unclassified	Unclassified	Unclassified	Unclassified	0	6	1	0	0	0	0	0	0	8	0	0	0	0	0	0	0	0	0	0	0	0	0	0
OTU_1666	Bacteria	Verrucomicrobia	Verrucomicrobiae	Arctic97B-4 marine group	uncultured bacterium	uncultured bacterium	uncultured bacterium	0	5	2	0	0	0	0	0	0	0	0	0	0	0	0	0	0	0	0	0	0	0	0	0
OTU_1667	Bacteria	Bacteroidetes	Bacteroidia	Flavobacteriales	NS9 marine group	uncultured marine bacterium	uncultured marine bacterium	0	7	0	0	0	0	0	0	0	0	0	0	5	0	0	0	0	0	0	2	0	0	0	0
OTU_1668	Bacteria	Margulisbacteria	Unclassified	Unclassified	Unclassified	Unclassified	Unclassified	10	0	0	0	1	1	0	0	0	0	0	0	0	0	1	0	0	0	0	0	0	0	0	0
OTU_1669	Bacteria	Chloroflexi	Dehalococcoidia	SAR202 clade	uncultured Chloroflexi bacterium	uncultured Chloroflexi bacterium	uncultured Chloroflexi bacterium	0	41	2	0	0	0	0	0	0	0	0	0	1	16	2	0	0	0	0	4	0	0	0	0
OTU_1671	Bacteria	Patescibacteria	Gracilibacteria	uncultured bacterium	uncultured bacterium	uncultured bacterium	uncultured bacterium	0	0	2	0	0	0	0	0	0	0	0	0	0	0	1	0	0	0	0	0	0	0	1	0
OTU_1673	Bacteria	Firmicutes	Clostridia	Clostridiales	Family XI	Peptoniphilus	uncultured bacterium	0	0	0	0	0	0	0	0	0	2	0	0	0	0	0	0	9	0	0	0	0	0	0	0
OTU_1674	Bacteria	Proteobacteria	Deltaproteobacteria	Desulfarculales	Desulfarculaceae	uncultured	uncultured bacterium	0	0	0	0	0	0	0	0	0	0	0	0	0	0	0	0	0	0	3	0	0	0	0	0
OTU_1675	Bacteria	Proteobacteria	Gammaproteobacteria	Betaproteobacteriales	Burkholderiaceae	Variovorax	Variovorax paradoxus	0	0	0	0	5	0	0	0	0	0	0	0	0	0	0	0	0	0	0	0	0	0	0	0
OTU_1676	Bacteria	Proteobacteria	Gammaproteobacteria	Pseudomonadales	Pseudomonadaceae	Pseudomonas	Pseudomonas psychrotolerans L19	0	0	0	0	0	0	0	0	0	0	0	2	0	0	0	0	0	0	0	1	0	0	0	0
OTU_1677	Bacteria	Nitrospinae	Nitrospinia	Nitrospinales	Nitrospinaceae	LS-NOB	uncultured delta proteobacterium	0	0	0	0	0	0	0	0	0	0	0	0	0	0	0	0	0	0	4	0	0	0	1	0
OTU_1679	Bacteria	Proteobacteria	Alphaproteobacteria	Rickettsiales	Midichloriaceae	MD3-55	uncultured Rickettsiales bacterium	0	0	0	0	0	0	0	0	0	0	0	0	0	0	0	0	0	0	0	3	0	0	0	0
OTU_168	Bacteria	Proteobacteria	Gammaproteobacteria	Pseudomonadales	Moraxellaceae	Psychrobacter	uncultured gamma proteobacterium	7	3	0	5	96	76	1	0	0	0	3	42	0	0	4	4	6	2	1	0	8	1	1	0
OTU_1680	Bacteria	Proteobacteria	Alphaproteobacteria	Rhodobacterales	Rhodobacteraceae	Actibacterium	uncultured bacterium	0	0	1	0	0	0	0	3	0	0	0	0	0	0	0	0	0	0	0	0	0	0	0	0
OTU_1681	Bacteria	Proteobacteria	Alphaproteobacteria	uncultured	uncultured bacterium	uncultured bacterium	uncultured bacterium	0	3	1	0	0	0	0	0	0	0	0	0	0	1	1	0	0	1	0	0	0	0	0	0
OTU_1682	Bacteria	Verrucomicrobia	Verrucomicrobiae	Verrucomicrobiales	Rubritaleaceae	Rubritalea	uncultured bacterium	0	2	0	0	0	0	0	0	0	0	0	0	3	0	0	0	0	0	3	0	0	0	0	0
OTU_1683	Bacteria	Chloroflexi	Dehalococcoidia	SAR202 clade	uncultured Chloroflexales bacterium	uncultured Chloroflexales bacterium	uncultured Chloroflexales bacterium	0	0	0	0	0	2	0	0	0	0	0	0	0	0	6	1	0	3	0	0	0	0	0	0
OTU_1684	Bacteria	Actinobacteria	Actinobacteria	Micrococcales	Micrococcaceae	Kocuria	Kocuria kristinae	0	0	1	1	0	1	0	0	8	0	0	0	0	0	0	0	0	0	0	0	0	0	0	0
OTU_1685	Bacteria	Proteobacteria	Gammaproteobacteria	Oceanospirillales	Pseudohongiellaceae	Pseudohongiella	Pseudohongiella sp. SCS-49	0	0	0	0	0	0	0	0	0	0	0	0	0	4	0	1	0	0	0	0	0	0	0	0
OTU_1686	Bacteria	Chloroflexi	Dehalococcoidia	SAR202 clade	uncultured bacterium	uncultured bacterium	uncultured bacterium	0	8	0	0	0	0	0	0	0	0	0	0	0	1	0	0	0	0	0	0	0	0	0	0
OTU_1687	Bacteria	Bacteroidetes	Bacteroidia	Bacteroidales	Porphyromonadaceae	Porphyromonas	Porphyromonas sp. HMSC065F10	0	0	0	0	0	0	0	0	0	0	0	0	0	0	0	3	9	0	0	0	0	0	0	0
OTU_1688	Bacteria	Proteobacteria	Gammaproteobacteria	Coxiellales	Coxiellaceae	Coxiella	uncultured Legionellales bacterium	9	0	0	0	0	0	3	0	0	0	0	0	1	0	0	0	0	0	0	0	0	0	0	0
OTU_1689	Bacteria	Proteobacteria	Alphaproteobacteria	Rhodobacterales	Rhodobacteraceae	Donghicola	uncultured bacterium	0	0	0	1	16	4	0	0	1	0	1	8	0	0	1	0	3	3	0	0	4	0	4	0
OTU_169	Bacteria	Proteobacteria	Alphaproteobacteria	SAR11 clade	Clade II	uncultured bacterium	uncultured bacterium	54	0	0	0	0	0	7	0	0	0	0	0	7	1	0	0	0	2	12	0	0	1	0	0
OTU_1691	Bacteria	Proteobacteria	Gammaproteobacteria	Cellvibrionales	Halieaceae	OM60(NOR5) clade	uncultured bacterium	0	0	0	0	0	0	0	0	0	0	0	0	0	0	0	0	0	0	0	0	0	0	2	0
OTU_1692	Bacteria	Verrucomicrobia	Verrucomicrobiae	Arctic97B-4 marine group	uncultured marine bacterium	uncultured marine bacterium	uncultured marine bacterium	6	0	0	0	0	0	0	0	0	0	0	0	0	0	0	0	0	0	0	0	0	0	0	0
OTU_1693	Bacteria	Actinobacteria	Coriobacteriia	Coriobacteriales	Atopobiaceae	Atopobium	uncultured bacterium	0	0	0	0	0	0	0	0	0	0	0	0	0	0	0	0	0	0	0	0	0	0	6	0
OTU_1694	Bacteria	Planctomycetes	Planctomycetacia	Pirellulales	Pirellulaceae	Rhodopirellula	Unclassified	0	0	0	3	4	0	0	0	2	1	0	0	0	0	0	5	0	0	0	0	0	1	0	0
OTU_1695	Bacteria	Proteobacteria	Deltaproteobacteria	Myxococcales	bacteriap25	Unclassified	Unclassified	0	0	2	2	1	0	0	0	6	0	0	0	0	0	0	0	0	0	0	0	0	0	0	0
OTU_1696	Bacteria	Bacteroidetes	Bacteroidia	Bacteroidales	Prevotellaceae	Prevotella 9	uncultured bacterium	0	0	0	0	0	0	0	0	0	0	0	0	0	0	0	0	0	0	0	0	5	0	0	0
OTU_1697	Bacteria	Proteobacteria	Alphaproteobacteria	Rhodobacterales	Rhodobacteraceae	Sulfitobacter	uncultured bacterium	2	2	0	7	23	39	1	0	1	3	4	6	0	3	2	21	42	107	2	1	1	8	27	2
OTU_1698	Bacteria	Planctomycetes	OM190	uncultured bacterium	uncultured bacterium	uncultured bacterium	uncultured bacterium	0	0	0	0	0	1	0	1	2	0	0	1	0	1	0	0	0	2	0	3	0	5	16	0
OTU_1699	Bacteria	Marinimicrobia (SAR406 clade)	Marinimicrobia bacterium SCGC AAA003-E22	Marinimicrobia bacterium SCGC AAA003-E22	Marinimicrobia bacterium SCGC AAA003-E22	Marinimicrobia bacterium SCGC AAA003-E22	Marinimicrobia bacterium SCGC AAA003-E22	0	0	5	0	0	0	0	0	0	0	0	0	0	8	0	0	0	0	0	0	0	0	0	0
OTU_17	Bacteria	Proteobacteria	Alphaproteobacteria	Rhizobiales	Beijerinckiaceae	Methylobacterium	Methylobacterium oryzae	175	15	42	24	164	98	1	27	75	22	24	33	0	0	1	12	50	12	38	27	57	50	46	0
OTU_170	Bacteria	Bacteroidetes	Bacteroidia	Cytophagales	Cyclobacteriaceae	Marinoscillum	marine metagenome	80	0	1	0	0	0	3	1	1	0	0	0	12	1	0	0	0	0	2	0	0	0	15	0
OTU_1700	Bacteria	Proteobacteria	Deltaproteobacteria	NB1-j	uncultured delta proteobacterium	uncultured delta proteobacterium	uncultured delta proteobacterium	0	0	0	0	0	1	0	0	0	0	0	1	0	0	0	0	0	2	0	0	5	6	20	0
OTU_1701	Bacteria	Proteobacteria	Gammaproteobacteria	UBA10353 marine group	uncultured marine microorganism	uncultured marine microorganism	uncultured marine microorganism	0	0	9	0	0	0	0	0	0	0	0	0	0	1	0	0	1	0	0	0	0	0	0	0
OTU_1702	Bacteria	Actinobacteria	Actinobacteria	Micrococcales	Microbacteriaceae	Pseudoclavibacter	Zimmermannella alba NBRC 15616	0	0	1	0	1	0	0	0	0	0	2	0	0	0	0	0	0	0	0	0	0	0	0	0
OTU_1703	Bacteria	Firmicutes	Clostridia	Clostridiales	Ruminococcaceae	Faecalibacterium	uncultured organism	0	0	0	0	0	0	0	0	0	0	0	0	0	0	0	0	0	0	0	0	7	0	0	0
OTU_1704	Bacteria	PAUC34f	uncultured bacterium	uncultured bacterium	uncultured bacterium	uncultured bacterium	uncultured bacterium	0	0	1	3	1	2	0	0	0	0	0	0	0	0	2	7	0	0	0	0	0	0	0	0
OTU_1705	Bacteria	Planctomycetes	Planctomycetacia	Pirellulales	Pirellulaceae	Rhodopirellula	Unclassified	0	0	0	0	0	0	0	0	0	0	0	0	0	0	0	0	0	0	0	0	0	0	2	0
OTU_1706	Bacteria	Bacteroidetes	Bacteroidia	Flavobacteriales	NS9 marine group	uncultured bacterium	uncultured bacterium	0	0	0	0	0	0	0	0	0	0	0	0	0	0	0	0	0	0	6	0	0	0	0	2
OTU_1707	Bacteria	Proteobacteria	Deltaproteobacteria	Oligoflexales	Oligoflexaceae	uncultured	uncultured marine bacterium	0	0	0	0	0	0	0	0	0	0	0	0	0	2	0	0	0	0	0	0	0	0	0	0
OTU_1708	Bacteria	Proteobacteria	Deltaproteobacteria	Bdellovibrionales	Bacteriovoracaceae	Peredibacter	uncultured bacterium	0	0	0	0	0	0	0	0	0	2	0	0	0	0	0	0	0	0	0	4	0	0	0	0
OTU_1709	Bacteria	Chloroflexi	Dehalococcoidia	SAR202 clade	Unclassified	Unclassified	Unclassified	0	0	1	0	6	0	0	0	0	0	0	0	0	0	0	3	0	0	0	0	0	0	0	0
OTU_171	Bacteria	Proteobacteria	Alphaproteobacteria	Rhodobacterales	Rhodobacteraceae	uncultured	marine metagenome	95	3	5	0	4	14	26	17	12	0	0	1	61	8	1	1	1	3	74	7	0	0	4	0
OTU_1710	Bacteria	Patescibacteria	Parcubacteria	Unclassified	Unclassified	Unclassified	Unclassified	0	0	0	0	0	0	0	0	3	0	0	0	0	0	0	0	0	0	0	0	0	0	0	0
OTU_1711	Bacteria	Chloroflexi	Dehalococcoidia	SAR202 clade	Unclassified	Unclassified	Unclassified	0	0	14	1	1	5	0	0	0	1	0	0	0	1	12	1	2	7	0	0	0	0	0	0
OTU_1712	Bacteria	Proteobacteria	Gammaproteobacteria	KI89A clade	uncultured gamma proteobacterium	uncultured gamma proteobacterium	uncultured gamma proteobacterium	0	4	1	0	0	0	0	0	0	0	0	0	0	1	0	0	0	0	0	0	0	0	0	0
OTU_1713	Bacteria	Bacteroidetes	Bacteroidia	Bacteroidales	Marinilabiliaceae	Carboxylicivirga	Bacteroidetes bacterium HY2	0	0	0	0	0	0	0	0	0	0	0	0	0	0	0	0	0	0	0	0	9	1	0	0
OTU_1714	Bacteria	Marinimicrobia (SAR406 clade)	Marinimicrobia bacterium SCGC AAA003-E22	Marinimicrobia bacterium SCGC AAA003-E22	Marinimicrobia bacterium SCGC AAA003-E22	Marinimicrobia bacterium SCGC AAA003-E22	Marinimicrobia bacterium SCGC AAA003-E22	0	4	8	0	0	1	0	0	0	0	0	0	0	6	10	1	6	2	0	0	0	0	0	0
OTU_1715	Bacteria	Bacteroidetes	Ignavibacteria	OPB56	uncultured bacterium	uncultured bacterium	uncultured bacterium	0	4	0	0	0	0	0	0	0	0	0	0	0	0	0	0	0	0	0	0	0	0	0	0
OTU_1716	Bacteria	Proteobacteria	Deltaproteobacteria	PB19	uncultured delta proteobacterium	uncultured delta proteobacterium	uncultured delta proteobacterium	0	2	0	0	8	0	0	0	0	0	0	0	0	0	1	0	1	0	0	0	0	0	0	0
OTU_1717	Bacteria	Proteobacteria	Deltaproteobacteria	Myxococcales	P3OB-42	uncultured delta proteobacterium	uncultured delta proteobacterium	0	4	0	0	0	0	0	0	0	0	0	0	0	0	0	0	0	0	0	0	0	0	0	0
OTU_1718	Bacteria	Planctomycetes	Planctomycetacia	Pirellulales	Pirellulaceae	Rhodopirellula	uncultured bacterium	0	0	0	0	0	0	0	0	2	0	0	0	0	0	0	0	0	0	0	0	0	0	0	0
OTU_1719	Bacteria	Planctomycetes	Phycisphaerae	Phycisphaerales	Phycisphaeraceae	SM1A02	uncultured bacterium	0	0	0	0	0	0	0	0	0	0	0	0	0	0	0	0	0	2	0	0	0	0	0	0
OTU_172	Bacteria	Planctomycetes	OM190	uncultured Planctomycetaceae bacterium	uncultured Planctomycetaceae bacterium	uncultured Planctomycetaceae bacterium	uncultured Planctomycetaceae bacterium	0	1	0	0	0	0	0	16	0	0	0	0	0	0	0	0	0	0	0	32	0	0	0	0
OTU_1720	Bacteria	Chloroflexi	Dehalococcoidia	SAR202 clade	uncultured Chloroflexi bacterium	uncultured Chloroflexi bacterium	uncultured Chloroflexi bacterium	0	6	0	0	0	0	0	0	0	0	0	0	0	4	0	0	0	0	0	1	0	0	0	0
OTU_1721	Bacteria	Actinobacteria	Actinobacteria	Micrococcales	Micrococcaceae	Kocuria	Unclassified	0	0	0	0	0	1	0	0	11	0	3	0	0	0	0	0	0	0	0	0	1	0	0	0
OTU_1722	Bacteria	Nitrospinae	Nitrospinia	Nitrospinales	Nitrospinaceae	Nitrospina	uncultured bacterium	0	2	0	0	0	0	0	0	0	0	0	0	0	0	0	0	0	0	0	5	0	0	0	0
OTU_1723	Bacteria	Proteobacteria	Alphaproteobacteria	Unclassified	Unclassified	Unclassified	Unclassified	0	0	1	0	0	0	0	0	4	0	0	0	0	0	0	0	0	0	0	0	0	0	0	0
OTU_1724	Bacteria	Spirochaetes	Spirochaetia	Spirochaetales	Spirochaetaceae	Spirochaeta 2	uncultured bacterium	0	0	2	0	0	0	0	0	0	0	0	0	0	0	0	0	0	0	0	0	0	0	0	0
OTU_1725	Bacteria	Proteobacteria	Alphaproteobacteria	Rickettsiales	Rickettsiaceae	uncultured	uncultured bacterium	0	0	0	0	0	0	0	0	0	0	0	0	0	0	2	0	0	0	0	0	0	0	0	0
OTU_1726	Bacteria	Proteobacteria	Gammaproteobacteria	EC3	Unclassified	Unclassified	Unclassified	0	0	0	0	0	0	0	0	0	0	0	0	0	0	0	0	0	0	0	0	0	0	3	0
OTU_1728	Bacteria	Proteobacteria	Alphaproteobacteria	Sphingomonadales	Sphingomonadaceae	Novosphingobium	uncultured bacterium	0	0	0	0	0	0	0	0	0	0	0	0	0	0	0	0	0	0	0	0	0	2	1	0
OTU_1729	Bacteria	Proteobacteria	Alphaproteobacteria	Sphingomonadales	Sphingomonadaceae	Croceicoccus	Croceicoccus mobilis	0	0	1	5	1	1	0	1	12	0	0	0	0	2	0	0	1	6	8	107	0	0	0	0
OTU_173	Bacteria	Acidobacteria	Subgroup 6	Unclassified	Unclassified	Unclassified	Unclassified	0	11	24	5	13	26	0	0	1	0	0	0	0	18	36	26	16	12	0	0	2	2	0	0
OTU_1730	Bacteria	Proteobacteria	Deltaproteobacteria	SAR324 clade(Marine group B)	uncultured delta proteobacterium Sva0853	uncultured delta proteobacterium Sva0853	uncultured delta proteobacterium Sva0853	0	0	1	0	0	0	0	0	0	0	0	0	0	0	3	0	0	0	0	0	0	0	0	0
OTU_1731	Bacteria	Bacteroidetes	Bacteroidia	Cytophagales	Cyclobacteriaceae	uncultured	uncultured Bacteroidetes bacterium	0	0	0	0	0	0	0	0	0	0	0	0	0	0	0	0	0	0	0	0	0	0	2	0
OTU_1732	Bacteria	Proteobacteria	Deltaproteobacteria	Bdellovibrionales	Bacteriovoracaceae	Peredibacter	Unclassified	0	0	1	1	0	1	0	0	1	0	0	1	0	1	0	0	0	0	2	0	0	0	0	0
OTU_1733	Bacteria	Proteobacteria	Deltaproteobacteria	PB19	uncultured delta proteobacterium DeepAnt-32C6	uncultured delta proteobacterium DeepAnt-32C6	uncultured delta proteobacterium DeepAnt-32C6	0	0	0	0	0	0	0	0	0	0	0	0	0	1	0	0	0	2	0	0	0	0	0	0
OTU_1734	Bacteria	Patescibacteria	Gracilibacteria	Candidatus Peregrinibacteria	uncultured bacterium	uncultured bacterium	uncultured bacterium	0	0	0	0	0	0	2	0	0	0	0	0	3	0	0	0	0	0	0	0	0	0	0	0
OTU_1735	Bacteria	Proteobacteria	Gammaproteobacteria	Cellvibrionales	Halieaceae	Halioglobus	uncultured bacterium	0	1	0	0	0	0	0	5	0	0	0	0	0	0	0	0	0	0	0	0	0	0	0	0
OTU_1736	Bacteria	Actinobacteria	Acidimicrobiia	Microtrichales	Microtrichaceae	Sva0996 marine group	marine metagenome	0	0	0	0	0	0	0	0	0	0	0	0	11	0	0	0	0	0	0	0	0	0	0	0
OTU_1737	Bacteria	Proteobacteria	Gammaproteobacteria	Betaproteobacteriales	Methylophilaceae	OM43 clade	uncultured beta proteobacterium	0	0	2	0	0	4	0	0	0	0	0	0	0	0	0	0	1	4	0	0	0	0	0	0
OTU_1738	Bacteria	Chloroflexi	Dehalococcoidia	SAR202 clade	uncultured gamma proteobacterium	uncultured gamma proteobacterium	uncultured gamma proteobacterium	0	0	1	1	0	0	0	0	0	0	0	0	0	0	4	1	0	0	0	0	0	0	0	0
OTU_1739	Bacteria	Proteobacteria	Gammaproteobacteria	Coxiellales	Coxiellaceae	Coxiella	uncultured bacterium	0	0	0	0	2	0	0	0	0	0	0	0	0	0	0	0	0	0	0	0	0	0	0	0
OTU_174	Bacteria	Proteobacteria	Alphaproteobacteria	Rhodobacterales	Rhodobacteraceae	Ruegeria	uncultured bacterium	0	0	0	0	1	1	0	1	0	1	0	3	0	0	2	4	0	0	0	2	27	2	8	0
OTU_1740	Bacteria	Chloroflexi	Dehalococcoidia	SAR202 clade	uncultured deep-sea bacterium	uncultured deep-sea bacterium	uncultured deep-sea bacterium	0	0	0	0	2	0	0	0	0	0	0	0	0	0	0	0	0	4	0	0	0	0	0	0
OTU_1741	Bacteria	Chloroflexi	Dehalococcoidia	SAR202 clade	Unclassified	Unclassified	Unclassified	0	0	0	0	0	0	0	0	0	0	0	0	0	0	0	0	0	4	0	0	0	0	0	0
OTU_1742	Bacteria	Proteobacteria	Deltaproteobacteria	Bdellovibrionales	Bacteriovoracaceae	Peredibacter	Unclassified	8	0	0	0	0	2	0	0	0	0	0	0	0	0	0	0	0	2	0	0	0	0	0	0
OTU_1743	Bacteria	Proteobacteria	Deltaproteobacteria	NB1-j	uncultured bacterium	uncultured bacterium	uncultured bacterium	0	1	0	0	0	0	0	0	0	0	0	0	0	1	0	0	0	0	0	5	0	0	0	0
OTU_1744	Bacteria	Proteobacteria	Deltaproteobacteria	PB19	uncultured marine bacterium	uncultured marine bacterium	uncultured marine bacterium	0	0	0	0	0	0	0	0	0	0	0	0	0	0	0	0	0	0	0	0	0	0	10	0
OTU_1745	Bacteria	Proteobacteria	Gammaproteobacteria	Francisellales	Francisellaceae	uncultured	uncultured bacterium	0	0	0	0	0	0	0	0	0	0	0	0	0	0	0	0	0	0	6	0	0	0	0	0
OTU_1746	Bacteria	Chloroflexi	Dehalococcoidia	SAR202 clade	Unclassified	Unclassified	Unclassified	0	0	0	0	0	0	0	0	0	0	0	0	0	0	5	0	0	0	0	0	0	0	0	0
OTU_1747	Bacteria	Planctomycetes	OM190	uncultured bacterium	uncultured bacterium	uncultured bacterium	uncultured bacterium	0	0	0	0	0	0	0	0	0	0	0	0	0	0	0	0	0	0	5	0	0	0	0	0
OTU_175	Bacteria	Proteobacteria	Gammaproteobacteria	B2M28	uncultured gamma proteobacterium	uncultured gamma proteobacterium	uncultured gamma proteobacterium	0	0	0	0	0	0	0	0	105	0	0	0	0	0	0	0	0	0	0	0	0	0	0	0
OTU_1750	Bacteria	Proteobacteria	Gammaproteobacteria	Vibrionales	Vibrionaceae	Vibrio	Vibrio shilonii AK1	0	0	0	0	0	0	0	0	0	0	0	0	0	0	0	0	0	0	5	0	0	0	0	0
OTU_1751	Bacteria	Marinimicrobia (SAR406 clade)	marine metagenome	marine metagenome	marine metagenome	marine metagenome	marine metagenome	29	0	2	0	0	0	0	0	0	0	0	0	1	0	2	0	0	0	0	0	0	0	2	0
OTU_1752	Bacteria	Proteobacteria	Gammaproteobacteria	Ga0077536	uncultured bacterium	uncultured bacterium	uncultured bacterium	6	0	0	0	0	0	0	0	0	0	0	0	0	0	0	0	0	0	0	0	0	0	0	0
OTU_1753	Bacteria	Proteobacteria	Alphaproteobacteria	Rickettsiales	AB1	Unclassified	Unclassified	0	0	0	0	0	0	0	0	0	0	0	0	0	0	0	0	0	0	0	0	0	3	0	0
OTU_1754	Bacteria	Proteobacteria	Deltaproteobacteria	Bdellovibrionales	Bdellovibrionaceae	OM27 clade	uncultured bacterium	0	0	0	0	0	0	0	0	0	0	0	0	3	0	0	0	0	0	0	0	0	0	0	0
OTU_1755	Bacteria	Patescibacteria	Gracilibacteria	uncultured bacterium	uncultured bacterium	uncultured bacterium	uncultured bacterium	0	0	0	0	0	2	0	0	0	0	0	0	0	0	0	0	0	0	0	0	0	0	0	0
OTU_1756	Bacteria	Planctomycetes	Planctomycetacia	Pirellulales	Pirellulaceae	Rhodopirellula	uncultured bacterium	0	15	0	0	0	0	0	0	0	0	0	0	0	0	0	0	0	0	0	0	0	0	0	0
OTU_1757	Bacteria	Proteobacteria	Deltaproteobacteria	Unclassified	Unclassified	Unclassified	Unclassified	0	0	0	0	0	0	0	0	0	0	0	0	0	0	0	0	2	1	0	0	0	0	2	0
OTU_1758	Bacteria	Proteobacteria	Unclassified	Unclassified	Unclassified	Unclassified	Unclassified	0	4	5	0	0	0	0	0	0	0	0	0	0	0	0	0	0	0	5	0	0	0	0	0
OTU_1759	Bacteria	Chloroflexi	Dehalococcoidia	SAR202 clade	uncultured bacterium	uncultured bacterium	uncultured bacterium	0	2	0	1	3	1	0	0	0	0	0	0	0	1	0	0	0	1	0	0	0	0	0	0
OTU_176	Bacteria	Planctomycetes	Phycisphaerae	Phycisphaerales	Phycisphaeraceae	JL-ETNP-F27	uncultured bacterium	0	51	11	0	16	49	0	11	6	0	1	0	2	7	14	3	1	21	2	5	9	6	11	0
OTU_1760	Bacteria	Proteobacteria	Deltaproteobacteria	SAR324 clade(Marine group B)	marine metagenome	marine metagenome	marine metagenome	2	5	17	1	3	17	0	0	36	1	2	1	6	14	31	3	9	20	3	0	1	4	20	0
OTU_1761	Bacteria	Marinimicrobia (SAR406 clade)	Marinimicrobia bacterium SCGC AAA003-L08	Marinimicrobia bacterium SCGC AAA003-L08	Marinimicrobia bacterium SCGC AAA003-L08	Marinimicrobia bacterium SCGC AAA003-L08	Marinimicrobia bacterium SCGC AAA003-L08	0	3	0	0	0	0	0	0	0	0	0	0	0	1	0	0	0	0	0	0	0	0	0	0
OTU_1762	Bacteria	Proteobacteria	Alphaproteobacteria	Rickettsiales	Midichloriaceae	MD3-55	uncultured bacterium	0	0	0	0	0	0	0	0	0	0	0	0	0	0	0	0	0	0	3	0	0	0	0	0
OTU_1763	Bacteria	Actinobacteria	Actinobacteria	Propionibacteriales	Propionibacteriaceae	Tessaracoccus	Tessaracoccus sp. T2.5-30	0	0	0	0	0	0	0	0	0	0	0	0	0	0	0	0	0	0	0	0	4	0	0	0
OTU_1764	Bacteria	Proteobacteria	Gammaproteobacteria	Chromatiales	Sedimenticolaceae	Unclassified	Unclassified	0	0	0	0	0	0	0	0	0	0	1	0	0	0	0	0	0	0	0	0	0	4	10	0
OTU_1765	Bacteria	Acidobacteria	Subgroup 6	uncultured bacterium KM3-25-B4	uncultured bacterium KM3-25-B4	uncultured bacterium KM3-25-B4	uncultured bacterium KM3-25-B4	0	0	0	1	6	1	0	0	0	0	0	0	0	0	3	14	4	5	0	0	0	0	0	0
OTU_1766	Bacteria	Margulisbacteria	uncultured bacterium	uncultured bacterium	uncultured bacterium	uncultured bacterium	uncultured bacterium	0	0	0	0	0	0	0	0	0	0	0	0	0	0	0	7	0	0	0	0	0	0	0	0
OTU_1767	Bacteria	Proteobacteria	Alphaproteobacteria	Unclassified	Unclassified	Unclassified	Unclassified	0	3	0	0	0	0	0	0	0	0	0	0	0	0	0	0	0	0	0	0	0	0	1	0
OTU_1768	Bacteria	Proteobacteria	Deltaproteobacteria	Myxococcales	Polyangiaceae	Unclassified	Unclassified	0	0	0	0	0	0	0	0	0	0	2	0	0	0	1	0	0	0	0	0	0	0	0	0
OTU_1769	Bacteria	Proteobacteria	Deltaproteobacteria	NB1-j	uncultured bacterium	uncultured bacterium	uncultured bacterium	0	0	0	0	0	1	0	0	0	0	0	1	0	0	0	0	0	0	0	0	0	0	10	0
OTU_177	Bacteria	Acidobacteria	Subgroup 6	uncultured organism	uncultured organism	uncultured organism	uncultured organism	0	39	25	1	3	1	0	0	11	0	0	0	0	20	21	16	2	2	0	0	3	0	1	0
OTU_1770	Bacteria	Proteobacteria	Deltaproteobacteria	Bdellovibrionales	Bacteriovoracaceae	uncultured	uncultured marine bacterium	0	3	0	0	0	0	0	0	0	0	0	0	0	0	0	0	0	0	0	0	0	0	0	0
OTU_1771	Bacteria	Lentisphaerae	Lentisphaeria	Lentisphaerales	Lentisphaeraceae	Lentisphaera	uncultured bacterium	0	0	1	0	0	4	0	0	0	0	0	0	0	0	0	0	0	0	0	0	0	0	0	0
OTU_1772	Bacteria	Proteobacteria	Gammaproteobacteria	Coxiellales	Coxiellaceae	Coxiella	uncultured bacterium	0	0	0	0	0	0	0	0	0	0	0	0	0	0	0	0	0	0	2	0	0	0	0	0
OTU_1773	Bacteria	Lentisphaerae	Lentisphaeria	Lentisphaerales	Lentisphaeraceae	Lentisphaera	uncultured bacterium	0	0	0	0	0	0	0	2	0	0	0	0	0	2	0	0	0	0	0	0	0	0	0	0
OTU_1774	Bacteria	Proteobacteria	Deltaproteobacteria	Bradymonadales	uncultured bacterium	uncultured bacterium	uncultured bacterium	0	0	0	0	0	2	0	0	2	0	0	0	0	0	0	0	0	1	1	1	0	0	0	0
OTU_1775	Bacteria	Bacteroidetes	Bacteroidia	Flavobacteriales	Cryomorphaceae	uncultured	uncultured bacterium	0	0	0	0	0	0	0	0	0	0	2	0	0	0	0	0	0	0	0	0	0	0	0	0
OTU_1776	Bacteria	Proteobacteria	Deltaproteobacteria	Myxococcales	Blfdi19	uncultured marine bacterium	uncultured marine bacterium	0	0	0	0	0	0	0	0	2	0	0	0	0	0	0	0	0	0	1	0	0	0	0	0
OTU_1777	Bacteria	Bacteroidetes	Bacteroidia	Flavobacteriales	NS9 marine group	uncultured marine bacterium	uncultured marine bacterium	0	1	2	0	0	4	0	0	1	0	0	0	1	1	1	0	0	0	7	0	0	0	0	0
OTU_1778	Bacteria	Actinobacteria	Acidimicrobiia	Microtrichales	Microtrichaceae	Sva0996 marine group	marine metagenome	13	1	0	1	5	0	56	40	9	0	0	0	163	1	0	0	0	0	21	0	0	24	86	0
OTU_1779	Bacteria	Bacteroidetes	Bacteroidia	Sphingobacteriales	KD3-93	uncultured bacterium	uncultured bacterium	0	0	0	0	0	0	0	0	0	0	0	0	0	0	0	0	0	0	0	0	5	0	0	0
OTU_178	Bacteria	Planctomycetes	OM190	uncultured bacterium	uncultured bacterium	uncultured bacterium	uncultured bacterium	0	0	1	3	3	29	0	26	94	7	2	79	0	3	2	3	3	3	0	16	58	27	96	0
OTU_1780	Bacteria	Chloroflexi	Anaerolineae	Caldilineales	Caldilineaceae	uncultured	uncultured bacterium	0	0	0	0	0	0	0	0	0	0	0	0	0	0	0	0	0	0	4	0	0	0	0	0
OTU_1781	Bacteria	Unclassified	Unclassified	Unclassified	Unclassified	Unclassified	Unclassified	0	0	1	0	0	0	0	0	0	0	0	0	0	0	0	0	0	0	0	0	3	0	0	0
OTU_1782	Bacteria	Bacteroidetes	Bacteroidia	Flavobacteriales	Cryomorphaceae	uncultured	uncultured bacterium	0	0	0	0	0	0	0	0	2	0	0	0	0	0	0	0	0	0	0	2	0	0	0	0
OTU_1783	Bacteria	Bacteroidetes	Bacteroidia	Flavobacteriales	Weeksellaceae	Cloacibacterium	Cloacibacterium normanense	0	0	0	0	0	0	0	0	0	0	0	0	0	0	0	1	0	2	0	0	0	0	0	0
OTU_1785	Bacteria	Acidobacteria	Subgroup 21	uncultured bacterium	uncultured bacterium	uncultured bacterium	uncultured bacterium	0	0	0	0	0	3	0	0	0	0	0	0	0	0	0	0	0	4	0	0	0	0	0	0
OTU_1786	Bacteria	Chloroflexi	Dehalococcoidia	SAR202 clade	uncultured bacterium	uncultured bacterium	uncultured bacterium	0	0	0	0	0	0	0	0	0	0	0	0	0	0	0	0	0	2	0	0	0	0	0	0
OTU_1787	Bacteria	Acidobacteria	Subgroup 5	uncultured deep-sea bacterium	uncultured deep-sea bacterium	uncultured deep-sea bacterium	uncultured deep-sea bacterium	0	0	0	0	2	0	0	0	0	0	0	0	0	0	0	2	0	1	0	0	0	0	0	0
OTU_1788	Bacteria	Proteobacteria	Gammaproteobacteria	Coxiellales	Coxiellaceae	Coxiella	uncultured bacterium	0	0	1	1	0	0	0	0	0	0	0	0	0	0	0	0	0	0	0	0	0	0	0	0
OTU_1789	Bacteria	Proteobacteria	Gammaproteobacteria	OM182 clade	uncultured bacterium	uncultured bacterium	uncultured bacterium	0	2	0	0	0	0	0	0	0	0	0	0	0	0	0	0	0	0	3	0	0	0	1	0
OTU_179	Bacteria	Bacteroidetes	Bacteroidia	Flavobacteriales	Flavobacteriaceae	Unclassified	Unclassified	2	0	0	0	14	7	1	0	0	0	5	34	0	0	6	31	10	10	0	0	5	0	0	0
OTU_1790	Bacteria	Proteobacteria	Alphaproteobacteria	Rhodobacterales	Rhodobacteraceae	Unclassified	Unclassified	0	0	0	0	0	0	0	0	0	0	0	0	0	0	0	0	0	0	7	0	0	0	0	0
OTU_1791	Bacteria	Proteobacteria	Alphaproteobacteria	Rickettsiales	Rickettsiaceae	Candidatus Megaira	Unclassified	0	0	0	0	0	0	0	0	0	0	0	0	0	0	0	0	0	0	3	0	0	0	0	0
OTU_1792	Bacteria	Proteobacteria	Gammaproteobacteria	Coxiellales	Coxiellaceae	Coxiella	Unclassified	2	0	0	0	0	0	2	0	0	0	0	0	0	0	0	0	0	0	1	0	0	0	0	0
OTU_1793	Bacteria	Marinimicrobia (SAR406 clade)	uncultured bacterium	uncultured bacterium	uncultured bacterium	uncultured bacterium	uncultured bacterium	0	7	2	1	0	0	0	0	0	0	0	0	0	5	1	1	1	0	0	1	0	0	0	0
OTU_1794	Bacteria	Bacteroidetes	Bacteroidia	Bacteroidales	Prolixibacteraceae	Roseimarinus	uncultured Prolixibacter sp.	0	0	0	0	0	0	0	0	0	0	0	0	0	0	0	0	0	0	0	0	0	0	2	0
OTU_1795	Bacteria	Bacteroidetes	Bacteroidia	Cytophagales	Hymenobacteraceae	Pontibacter	Pontibacter humi	0	0	0	0	0	0	0	0	0	0	0	0	0	0	0	0	0	0	0	0	0	0	2	0
OTU_1796	Bacteria	Proteobacteria	Alphaproteobacteria	Micavibrionales	Micavibrionaceae	uncultured	uncultured organism	0	0	0	0	0	0	0	0	0	0	0	0	0	0	0	0	0	0	4	0	0	0	0	0
OTU_1797	Bacteria	Actinobacteria	Actinobacteria	Micrococcales	Micrococcaceae	Micrococcus	Micrococcus sp. B5W22-1	0	0	0	0	0	0	0	0	9	0	0	0	0	0	0	0	0	0	0	0	0	0	0	0
OTU_1798	Bacteria	Proteobacteria	Alphaproteobacteria	Rhizobiales	Beijerinckiaceae	uncultured	uncultured bacterium	0	0	0	0	0	0	0	0	7	0	0	0	0	0	0	0	0	0	0	0	0	0	0	0
OTU_1799	Bacteria	Proteobacteria	Gammaproteobacteria	Legionellales	Legionellaceae	Legionella	uncultured bacterium	0	0	0	0	0	0	0	0	0	0	0	0	0	0	0	0	0	0	0	0	6	0	0	0
OTU_18	Bacteria	Proteobacteria	Gammaproteobacteria	Oceanospirillales	Saccharospirillaceae	Oleibacter	uncultured bacterium	6	8	6	65	8	71	0	1	6	982	99	138	0	0	19	0	3	7	0	5	24	5	22	184
OTU_180	Bacteria	Proteobacteria	Alphaproteobacteria	Micavibrionales	Micavibrionaceae	uncultured	uncultured bacterium	13	0	2	0	1	0	0	0	3	12	0	0	1	0	0	0	0	0	25	0	0	0	0	0
OTU_1800	Bacteria	Bacteroidetes	Bacteroidia	Bacteroidales	Dysgonomonadaceae	Dysgonomonas	unidentified	0	0	0	0	0	0	0	0	0	0	0	2	0	0	0	0	0	0	0	0	3	0	0	0
OTU_1801	Bacteria	Planctomycetes	BD7-11	uncultured bacterium	uncultured bacterium	uncultured bacterium	uncultured bacterium	0	0	1	0	0	0	0	0	0	0	0	0	0	0	0	0	0	0	0	0	11	0	0	0
OTU_1802	Bacteria	Marinimicrobia (SAR406 clade)	marine metagenome	marine metagenome	marine metagenome	marine metagenome	marine metagenome	0	0	0	0	0	0	0	0	0	0	0	0	0	0	0	0	0	0	0	0	0	0	4	0
OTU_1803	Bacteria	Proteobacteria	Deltaproteobacteria	Bdellovibrionales	Bacteriovoracaceae	Peredibacter	uncultured bacterium	0	0	0	0	0	1	0	0	0	0	0	0	0	0	0	0	0	0	0	0	0	0	5	0
OTU_1804	Bacteria	Proteobacteria	Gammaproteobacteria	Betaproteobacteriales	Burkholderiaceae	Herbaspirillum	Unclassified	0	0	0	0	1	0	0	0	0	0	0	0	0	0	0	1	0	0	0	0	0	0	3	1
OTU_1805	Bacteria	Margulisbacteria	marine metagenome	marine metagenome	marine metagenome	marine metagenome	marine metagenome	0	0	0	0	0	0	0	0	0	0	0	0	0	0	0	0	0	9	0	0	0	0	0	0
OTU_1806	Bacteria	Nitrospinae	P9X2b3D02	Unclassified	Unclassified	Unclassified	Unclassified	0	1	0	0	0	0	0	0	0	0	0	0	0	5	0	0	0	0	0	0	0	0	0	0
OTU_1807	Bacteria	Proteobacteria	Alphaproteobacteria	Rhizobiales	Devosiaceae	Pelagibacterium	uncultured microorganism	0	1	0	1	1	0	1	0	0	0	0	0	4	0	0	0	0	0	4	0	0	0	0	0
OTU_1808	Bacteria	Acidobacteria	Subgroup 9	uncultured bacterium	uncultured bacterium	uncultured bacterium	uncultured bacterium	0	0	0	0	0	1	0	0	0	0	0	0	0	0	5	0	0	0	0	0	0	0	0	0
OTU_1809	Bacteria	Planctomycetes	Planctomycetacia	Planctomycetales	uncultured	uncultured bacterium	uncultured bacterium	0	0	0	0	0	0	0	0	0	0	0	1	0	0	0	0	0	0	0	0	0	2	1	0
OTU_181	Bacteria	Bacteroidetes	Bacteroidia	Flavobacteriales	Crocinitomicaceae	Salinirepens	uncultured bacterium	0	2	4	5	6	39	0	4	42	1	8	31	0	1	4	9	2	3	0	6	45	44	56	0
OTU_1810	Bacteria	Chloroflexi	Dehalococcoidia	SAR202 clade	Unclassified	Unclassified	Unclassified	0	0	0	0	0	1	0	0	0	0	0	0	0	0	0	0	0	11	0	0	0	0	0	0
OTU_1811	Bacteria	Chloroflexi	Dehalococcoidia	SAR202 clade	uncultured bacterium	uncultured bacterium	uncultured bacterium	0	0	0	0	0	2	0	0	0	0	0	0	0	0	0	0	1	0	0	0	0	0	0	0
OTU_1812	Bacteria	Proteobacteria	Gammaproteobacteria	Oceanospirillales	Saccharospirillaceae	Oleibacter	uncultured bacterium	6	0	3	9	1	13	0	1	0	164	12	23	0	0	6	0	0	4	0	15	2	2	9	21
OTU_1813	Bacteria	Proteobacteria	Deltaproteobacteria	NB1-j	uncultured Planctomycetaceae bacterium	uncultured Planctomycetaceae bacterium	uncultured Planctomycetaceae bacterium	0	0	0	1	0	0	0	0	0	0	0	0	0	0	0	0	1	0	0	0	0	1	10	0
OTU_1814	Bacteria	Firmicutes	Bacilli	Bacillales	Staphylococcaceae	S31	Staphylococcaceae bacterium S31	0	0	0	0	0	0	0	0	0	0	0	0	0	0	0	0	0	2	0	0	0	1	0	0
OTU_1815	Bacteria	Unclassified	Unclassified	Unclassified	Unclassified	Unclassified	Unclassified	0	0	0	0	0	1	0	0	0	0	0	0	0	0	0	0	0	2	0	0	0	0	0	0
OTU_1816	Bacteria	Planctomycetes	Pla3 lineage	Unclassified	Unclassified	Unclassified	Unclassified	0	0	3	0	0	0	0	0	15	1	0	0	0	0	3	0	0	0	0	0	4	0	0	0
OTU_1818	Bacteria	Proteobacteria	Gammaproteobacteria	Coxiellales	Coxiellaceae	Coxiella	uncultured marine microorganism	0	0	0	0	0	0	0	0	1	0	0	0	0	2	2	0	0	0	0	0	0	0	0	0
OTU_1819	Bacteria	Actinobacteria	Actinobacteria	Corynebacteriales	Corynebacteriaceae	Corynebacterium	uncultured bacterium	0	0	0	0	0	0	0	1	0	0	0	0	0	0	0	0	0	0	9	0	0	0	0	0
OTU_182	Bacteria	Chloroflexi	Dehalococcoidia	SAR202 clade	uncultured bacterium	uncultured bacterium	uncultured bacterium	0	45	52	0	0	0	0	0	9	0	0	0	1	17	43	3	0	2	0	2	0	0	0	0
OTU_1820	Bacteria	Proteobacteria	Alphaproteobacteria	Rickettsiales	Midichloriaceae	MD3-55	uncultured proteobacterium	0	0	0	0	0	0	1	0	0	0	0	0	0	0	0	0	0	0	2	0	0	2	0	0
OTU_1821	Bacteria	Unclassified	Unclassified	Unclassified	Unclassified	Unclassified	Unclassified	0	0	0	0	0	0	0	0	0	0	0	0	0	0	0	0	0	0	5	0	0	0	0	0
OTU_1822	Bacteria	Dadabacteria	Dadabacteriia	Dadabacteriales	metagenome	metagenome	metagenome	1	0	0	0	0	0	0	0	0	0	0	0	2	2	0	0	0	0	0	0	0	0	0	0
OTU_1823	Bacteria	Proteobacteria	Unclassified	Unclassified	Unclassified	Unclassified	Unclassified	0	0	1	0	0	0	0	0	1	0	0	0	0	0	0	0	0	0	0	0	3	0	0	0
OTU_1824	Bacteria	Proteobacteria	Deltaproteobacteria	Bdellovibrionales	Bdellovibrionaceae	OM27 clade	uncultured marine bacterium	0	0	0	0	0	0	0	0	0	0	0	0	1	0	0	0	0	0	0	0	2	0	0	0
OTU_1825	Bacteria	Proteobacteria	Gammaproteobacteria	Steroidobacterales	Woeseiaceae	Woeseia	uncultured bacterium	0	7	0	0	0	2	0	0	0	0	0	0	0	2	0	0	0	0	0	0	0	0	0	0
OTU_1826	Bacteria	Proteobacteria	Gammaproteobacteria	KI89A clade	uncultured bacterium	uncultured bacterium	uncultured bacterium	0	0	0	0	0	0	4	0	0	0	0	0	0	0	0	0	0	0	1	0	0	0	2	0
OTU_1827	Bacteria	Planctomycetes	Planctomycetacia	Planctomycetales	Rubinisphaeraceae	uncultured	uncultured Planctomycetaceae bacterium	0	0	1	0	0	0	0	0	1	0	0	4	0	0	0	0	0	0	2	0	0	0	3	0
OTU_1828	Bacteria	Proteobacteria	Deltaproteobacteria	PB19	uncultured bacterium	uncultured bacterium	uncultured bacterium	0	0	0	0	0	0	0	3	0	0	0	0	0	0	0	0	0	0	0	0	0	0	0	0
OTU_1829	Bacteria	Proteobacteria	Deltaproteobacteria	Unclassified	Unclassified	Unclassified	Unclassified	0	0	0	0	0	0	0	0	0	0	0	0	0	0	0	0	0	0	0	0	0	0	3	0
OTU_183	Bacteria	Proteobacteria	Alphaproteobacteria	Micavibrionales	Micavibrionaceae	uncultured	uncultured bacterium	0	0	0	0	0	0	0	0	2	0	0	0	0	1	0	0	0	0	1	34	1	0	0	0
OTU_1830	Bacteria	Proteobacteria	Deltaproteobacteria	Bdellovibrionales	Bacteriovoracaceae	uncultured	uncultured delta proteobacterium	9	0	0	0	0	0	0	0	0	0	0	0	2	1	0	0	0	0	0	0	0	0	17	0
OTU_1831	Bacteria	Acidobacteria	Subgroup 6	Unclassified	Unclassified	Unclassified	Unclassified	0	0	0	0	0	1	0	0	0	0	0	0	0	0	0	0	2	0	0	0	0	0	0	0
OTU_1832	Bacteria	Proteobacteria	Deltaproteobacteria	NB1-j	uncultured bacterium	uncultured bacterium	uncultured bacterium	0	0	0	0	0	0	0	0	1	0	0	0	0	0	0	0	0	0	0	0	3	0	0	0
OTU_1833	Bacteria	Patescibacteria	Gracilibacteria	uncultured bacterium	uncultured bacterium	uncultured bacterium	uncultured bacterium	0	0	0	0	0	0	0	0	0	0	0	0	0	0	0	0	0	3	0	0	0	0	0	0
OTU_1834	Bacteria	Proteobacteria	Alphaproteobacteria	Caulobacterales	Hyphomonadaceae	Algimonas	uncultured bacterium	0	0	0	2	5	0	0	0	0	0	3	0	0	0	0	0	3	0	0	0	0	1	1	0
OTU_1835	Bacteria	Actinobacteria	Acidimicrobiia	IMCC26256	uncultured Acidimicrobiales bacterium	uncultured Acidimicrobiales bacterium	uncultured Acidimicrobiales bacterium	0	0	0	0	0	0	0	0	0	6	0	0	0	0	0	0	0	0	0	0	0	0	0	0
OTU_1836	Bacteria	Proteobacteria	Deltaproteobacteria	PB19	uncultured delta proteobacterium DeepAnt-1F12	uncultured delta proteobacterium DeepAnt-1F12	uncultured delta proteobacterium DeepAnt-1F12	0	0	0	0	0	0	0	0	5	0	0	0	0	0	2	0	0	0	0	0	0	0	0	0
OTU_1837	Bacteria	Proteobacteria	Alphaproteobacteria	Caulobacterales	Caulobacteraceae	Phenylobacterium	uncultured Phenylobacterium sp.	3	0	1	0	0	0	0	0	1	0	0	4	0	0	0	0	0	0	0	0	0	0	0	0
OTU_1838	Bacteria	Chloroflexi	Dehalococcoidia	SAR202 clade	uncultured bacterium	uncultured bacterium	uncultured bacterium	0	0	1	0	0	1	0	0	0	0	0	0	0	0	3	0	0	4	0	0	0	0	0	0
OTU_1839	Bacteria	Bacteroidetes	Bacteroidia	Flavobacteriales	Cryomorphaceae	Unclassified	Unclassified	0	0	0	2	0	0	0	0	0	0	0	0	0	0	0	0	0	0	0	0	0	0	0	0
OTU_184	Bacteria	Planctomycetes	Planctomycetacia	Pirellulales	Pirellulaceae	uncultured	hydrothermal vent metagenome	0	0	3	24	14	21	0	0	0	0	7	4	0	0	1	14	34	21	0	0	0	5	34	0
OTU_1840	Bacteria	Proteobacteria	Deltaproteobacteria	Bdellovibrionales	Bacteriovoracaceae	uncultured	uncultured bacterium	11	0	0	0	0	0	0	0	0	0	0	0	0	0	0	0	0	0	2	0	0	0	0	0
OTU_1841	Bacteria	Bacteroidetes	Bacteroidia	Flavobacteriales	Cryomorphaceae	uncultured	Unclassified	0	0	1	0	0	0	0	0	0	0	3	0	0	0	0	0	0	0	0	0	7	0	0	0
OTU_1842	Bacteria	Acidobacteria	Subgroup 6	uncultured bacterium KM3-173-A5	uncultured bacterium KM3-173-A5	uncultured bacterium KM3-173-A5	uncultured bacterium KM3-173-A5	0	11	2	0	0	0	0	0	0	0	0	0	0	0	0	0	0	0	0	0	0	0	0	0
OTU_1843	Bacteria	Firmicutes	Clostridia	Clostridiales	Family XI	Anaerococcus	uncultured bacterium	1	0	0	0	0	0	0	0	0	0	0	0	0	0	0	3	2	0	0	1	0	0	0	0
OTU_1844	Bacteria	Planctomycetes	OM190	uncultured bacterium	uncultured bacterium	uncultured bacterium	uncultured bacterium	0	0	0	0	0	0	0	0	0	0	0	0	0	1	0	0	0	0	0	1	3	0	1	0
OTU_1845	Bacteria	Marinimicrobia (SAR406 clade)	uncultured bacterium	uncultured bacterium	uncultured bacterium	uncultured bacterium	uncultured bacterium	8	2	0	0	0	0	0	1	0	0	0	0	0	0	0	0	0	0	0	0	0	0	0	0
OTU_1846	Bacteria	Proteobacteria	Deltaproteobacteria	NB1-j	uncultured bacterium	uncultured bacterium	uncultured bacterium	0	0	0	3	1	2	0	1	0	0	0	1	0	0	2	4	4	0	0	1	4	10	0	0
OTU_1847	Bacteria	Patescibacteria	Gracilibacteria	Candidatus Peregrinibacteria	uncultured bacterium	uncultured bacterium	uncultured bacterium	0	0	0	0	0	2	0	0	0	0	0	0	0	0	0	0	0	0	0	0	0	0	0	0
OTU_1848	Bacteria	Lentisphaerae	Oligosphaeria	P.palmC41	uncultured Lentisphaerae bacterium	uncultured Lentisphaerae bacterium	uncultured Lentisphaerae bacterium	0	0	1	0	0	4	0	0	0	0	0	0	0	0	0	0	0	0	0	0	0	0	1	0
OTU_1849	Bacteria	Proteobacteria	Alphaproteobacteria	Rhizobiales	Rhizobiaceae	Unclassified	Unclassified	0	0	0	0	0	0	0	0	0	0	0	0	0	0	0	0	0	0	0	0	0	0	0	5
OTU_185	Bacteria	Nitrospinae	Nitrospinia	Nitrospinales	Nitrospinaceae	LS-NOB	uncultured bacterium	0	1	46	11	16	38	0	0	28	1	0	2	0	0	40	8	18	45	0	1	23	11	8	0
OTU_1850	Bacteria	Margulisbacteria	uncultured marine cyanobacterium	uncultured marine cyanobacterium	uncultured marine cyanobacterium	uncultured marine cyanobacterium	uncultured marine cyanobacterium	3	0	0	0	0	0	0	0	0	0	0	0	0	0	0	0	0	0	0	0	0	0	0	0
OTU_1851	Bacteria	Actinobacteria	Actinobacteria	Corynebacteriales	Corynebacteriaceae	Corynebacterium 1	unidentified	0	0	0	0	0	2	0	2	2	0	0	2	0	0	0	0	0	0	0	0	0	0	0	0
OTU_1852	Bacteria	Proteobacteria	Deltaproteobacteria	PB19	uncultured deep-sea bacterium	uncultured deep-sea bacterium	uncultured deep-sea bacterium	0	0	0	0	0	0	0	0	1	0	0	0	1	2	0	0	0	0	0	1	0	0	2	0
OTU_1853	Bacteria	Patescibacteria	Gracilibacteria	Candidatus Peribacteria	uncultured Microgenomates group bacterium	uncultured Microgenomates group bacterium	uncultured Microgenomates group bacterium	0	0	0	0	0	5	0	0	0	0	0	0	0	0	0	0	0	0	0	0	0	0	0	0
OTU_1854	Bacteria	Patescibacteria	Gracilibacteria	uncultured bacterium	uncultured bacterium	uncultured bacterium	uncultured bacterium	0	0	0	0	0	4	0	0	0	0	0	0	0	0	0	0	0	0	0	0	0	0	0	0
OTU_1855	Bacteria	Chloroflexi	Dehalococcoidia	SAR202 clade	uncultured bacterium	uncultured bacterium	uncultured bacterium	0	0	0	1	0	1	0	0	0	0	0	0	0	0	0	2	0	6	0	0	0	0	0	0
OTU_1856	Bacteria	Proteobacteria	Deltaproteobacteria	Unclassified	Unclassified	Unclassified	Unclassified	0	0	0	0	0	2	0	0	0	0	0	0	0	0	0	0	0	0	0	0	0	0	5	0
OTU_1858	Bacteria	Proteobacteria	Deltaproteobacteria	Bradymonadales	uncultured bacterium	uncultured bacterium	uncultured bacterium	0	0	2	0	0	0	0	0	0	0	0	0	0	0	0	0	0	0	0	1	0	0	0	0
OTU_186	Bacteria	Planctomycetes	OM190	uncultured bacterium	uncultured bacterium	uncultured bacterium	uncultured bacterium	0	0	0	2	22	8	0	0	6	6	5	12	0	0	0	0	2	10	0	0	14	13	73	0
OTU_1860	Bacteria	Proteobacteria	Gammaproteobacteria	AT-s2-59	Unclassified	Unclassified	Unclassified	0	0	1	0	0	0	0	0	1	0	0	0	1	0	0	0	0	0	4	0	0	1	1	0
OTU_1861	Bacteria	Marinimicrobia (SAR406 clade)	Unclassified	Unclassified	Unclassified	Unclassified	Unclassified	2	0	0	0	0	0	0	0	2	0	0	0	0	0	0	0	0	0	1	0	0	0	2	0
OTU_1862	Bacteria	Chloroflexi	Dehalococcoidia	SAR202 clade	uncultured bacterium	uncultured bacterium	uncultured bacterium	0	0	0	0	0	0	0	0	2	0	0	0	0	0	0	0	0	0	0	0	0	0	0	0
OTU_1863	Bacteria	Proteobacteria	Deltaproteobacteria	NB1-j	uncultured bacterium	uncultured bacterium	uncultured bacterium	0	0	0	0	0	0	0	0	0	0	2	0	0	0	0	0	1	0	0	0	0	3	2	0
OTU_1864	Bacteria	Proteobacteria	Gammaproteobacteria	Legionellales	Legionellaceae	Legionella	uncultured bacterium	0	0	0	0	0	0	0	0	0	0	0	0	0	0	1	0	4	0	1	0	0	0	0	0
OTU_1865	Bacteria	Proteobacteria	Alphaproteobacteria	Rickettsiales	AB1	Alphaproteobacteria bacterium GWB1_45_5	Alphaproteobacteria bacterium GWB1_45_5	0	0	0	0	1	0	0	0	0	0	0	0	0	0	1	0	0	0	0	0	0	0	0	0
OTU_1866	Bacteria	Proteobacteria	Deltaproteobacteria	Bradymonadales	uncultured marine bacterium	uncultured marine bacterium	uncultured marine bacterium	0	0	0	0	0	0	0	0	0	0	0	0	0	0	0	0	0	0	9	0	0	0	0	0
OTU_1867	Bacteria	Planctomycetes	Planctomycetacia	Planctomycetales	Gimesiaceae	uncultured	uncultured bacterium	0	0	0	0	0	0	0	0	0	0	0	0	0	0	0	0	0	0	4	0	1	0	1	0
OTU_1868	Bacteria	Margulisbacteria	Unclassified	Unclassified	Unclassified	Unclassified	Unclassified	0	0	3	0	0	1	0	0	0	0	0	0	0	0	0	0	0	0	0	0	0	0	0	0
OTU_1869	Bacteria	Proteobacteria	Deltaproteobacteria	NB1-j	uncultured bacterium	uncultured bacterium	uncultured bacterium	0	0	0	0	0	0	0	0	0	0	0	1	0	0	0	0	0	6	0	0	0	1	2	0
OTU_187	Bacteria	Acidobacteria	Subgroup 6	uncultured Acidimicrobiales bacterium	uncultured Acidimicrobiales bacterium	uncultured Acidimicrobiales bacterium	uncultured Acidimicrobiales bacterium	0	0	22	2	0	6	0	0	2	0	0	0	0	0	43	7	0	0	0	0	1	0	0	0
OTU_1870	Bacteria	Proteobacteria	Alphaproteobacteria	Rhodospirillales	AEGEAN-169 marine group	uncultured bacterium	uncultured bacterium	0	3	0	0	0	0	0	0	0	0	0	0	0	1	0	0	0	0	0	0	0	0	0	0
OTU_1871	Bacteria	Proteobacteria	Gammaproteobacteria	Cellvibrionales	Unclassified	Unclassified	Unclassified	0	1	1	0	0	0	0	0	0	0	0	0	0	1	1	0	0	2	0	2	0	0	0	0
OTU_1873	Bacteria	Bacteroidetes	Bacteroidia	Cytophagales	Hymenobacteraceae	Hymenobacter	Hymenobacter sp. HMF3095	0	0	0	0	0	0	0	0	0	0	0	0	0	0	0	0	0	0	0	0	0	0	5	0
OTU_1874	Bacteria	Proteobacteria	Gammaproteobacteria	Ectothiorhodospirales	Ectothiorhodospiraceae	uncultured	Unclassified	0	7	1	0	0	0	0	0	0	0	0	0	0	0	2	0	0	0	0	0	0	0	1	0
OTU_1876	Bacteria	Proteobacteria	Alphaproteobacteria	Rhodospirillales	AEGEAN-169 marine group	uncultured bacterium	uncultured bacterium	0	20	9	3	2	7	0	0	2	0	0	0	0	15	9	1	0	2	0	2	0	0	0	0
OTU_1877	Bacteria	Proteobacteria	Gammaproteobacteria	Gammaproteobacteria Incertae Sedis	Unknown Family	Marinicella	Marinicella litoralis	0	0	0	2	0	0	0	0	0	0	0	0	0	0	0	0	0	0	0	0	0	0	0	0
OTU_1878	Bacteria	Chloroflexi	Dehalococcoidia	SAR202 clade	uncultured gamma proteobacterium	uncultured gamma proteobacterium	uncultured gamma proteobacterium	0	0	0	0	12	0	0	0	0	0	0	0	0	0	0	0	0	0	0	0	0	0	0	0
OTU_1879	Bacteria	Unclassified	Unclassified	Unclassified	Unclassified	Unclassified	Unclassified	0	2	0	0	0	0	0	8	2	0	0	0	0	0	0	0	0	0	0	27	11	0	0	0
OTU_1880	Bacteria	Proteobacteria	Gammaproteobacteria	OM182 clade	uncultured gamma proteobacterium	uncultured gamma proteobacterium	uncultured gamma proteobacterium	0	0	0	0	0	0	0	0	0	0	0	0	0	0	0	0	0	4	0	0	0	0	0	0
OTU_1881	Bacteria	Firmicutes	Erysipelotrichia	Erysipelotrichales	Erysipelotrichaceae	Erysipelothrix	Unclassified	0	0	0	0	0	0	0	0	0	0	0	0	0	0	0	0	0	0	0	0	5	0	0	0
OTU_1882	Bacteria	Bacteroidetes	Bacteroidia	Chitinophagales	Saprospiraceae	uncultured	marine metagenome	0	0	0	0	0	0	0	0	0	0	0	0	0	0	0	0	0	0	0	0	0	0	5	0
OTU_1883	Bacteria	Proteobacteria	Gammaproteobacteria	OM182 clade	uncultured bacterium	uncultured bacterium	uncultured bacterium	0	1	0	0	0	1	0	0	1	0	0	0	0	0	6	0	0	0	0	0	0	0	0	0
OTU_1884	Bacteria	Proteobacteria	Alphaproteobacteria	Rhodobacterales	Rhodobacteraceae	uncultured	uncultured marine bacterium	8	0	0	0	2	0	0	0	0	0	0	0	3	0	0	0	0	0	5	0	0	0	3	0
OTU_1885	Bacteria	Marinimicrobia (SAR406 clade)	Marinimicrobia bacterium SCGC AAA003-E22	Marinimicrobia bacterium SCGC AAA003-E22	Marinimicrobia bacterium SCGC AAA003-E22	Marinimicrobia bacterium SCGC AAA003-E22	Marinimicrobia bacterium SCGC AAA003-E22	0	0	8	0	0	0	0	0	1	0	0	0	0	2	0	0	0	0	0	0	0	0	0	0
OTU_1886	Bacteria	Planctomycetes	OM190	Unclassified	Unclassified	Unclassified	Unclassified	0	0	0	0	0	0	0	7	0	0	0	0	0	0	0	0	0	0	0	12	0	0	0	0
OTU_1887	Bacteria	Actinobacteria	Actinobacteria	Corynebacteriales	Mycobacteriaceae	Mycobacterium	uncultured Mycobacteriaceae bacterium	0	4	0	0	0	0	0	1	1	0	0	1	0	0	0	1	2	0	0	0	0	0	0	0
OTU_1888	Bacteria	Actinobacteria	Thermoleophilia	Solirubrobacterales	67-14	uncultured actinobacterium	uncultured actinobacterium	0	1	0	1	5	2	0	0	0	0	0	0	0	1	0	7	6	2	0	0	0	0	1	0
OTU_1889	Bacteria	Margulisbacteria	metagenome	metagenome	metagenome	metagenome	metagenome	10	0	0	0	0	0	0	0	0	0	0	0	0	0	1	0	0	0	0	0	0	0	0	0
OTU_189	Bacteria	Proteobacteria	Gammaproteobacteria	Betaproteobacteriales	Burkholderiaceae	MWH-UniP1 aquatic group	uncultured bacterium	34	0	0	0	0	0	1	0	0	0	0	0	1	0	0	0	0	0	24	0	0	0	0	0
OTU_1890	Bacteria	Bacteroidetes	Bacteroidia	Flavobacteriales	Flavobacteriaceae	Zunongwangia	Zunongwangia profunda SM-A87	0	0	0	6	0	0	0	0	0	0	0	0	0	0	0	0	0	2	0	0	0	0	0	0
OTU_1891	Bacteria	Proteobacteria	Deltaproteobacteria	Bdellovibrionales	Bdellovibrionaceae	OM27 clade	uncultured marine bacterium	0	0	0	0	0	0	0	0	0	0	0	0	0	0	0	0	0	0	1	0	0	0	1	0
OTU_1892	Bacteria	Firmicutes	Bacilli	Bacillales	Staphylococcaceae	Aliicoccus	uncultured Jeotgalibacillus sp.	0	0	0	0	0	0	0	1	0	6	0	0	0	0	0	0	0	0	0	0	0	1	3	0
OTU_1893	Bacteria	Chloroflexi	Dehalococcoidia	SAR202 clade	uncultured bacterium	uncultured bacterium	uncultured bacterium	0	0	3	0	0	0	0	0	0	0	0	0	0	0	0	0	0	0	0	0	0	0	0	0
OTU_1894	Bacteria	Proteobacteria	Deltaproteobacteria	Myxococcales	Blfdi19	uncultured deep-sea bacterium	uncultured deep-sea bacterium	0	0	1	0	0	0	0	0	0	0	0	0	0	0	5	0	0	4	0	0	0	0	0	0
OTU_1896	Bacteria	Proteobacteria	Gammaproteobacteria	Coxiellales	Coxiellaceae	Coxiella	uncultured bacterium	0	1	0	0	0	0	0	0	0	0	0	0	0	1	0	3	0	2	0	0	0	0	0	0
OTU_1897	Bacteria	Lentisphaerae	Lentisphaeria	Lentisphaerales	Lentisphaeraceae	Lentisphaera	uncultured bacterium	0	0	0	0	0	0	0	0	0	0	0	0	0	0	0	0	0	3	0	0	0	0	0	0
OTU_1898	Bacteria	Proteobacteria	Alphaproteobacteria	Caulobacterales	Caulobacteraceae	Phenylobacterium	uncultured bacterium	0	0	0	0	0	0	0	0	0	0	0	0	0	0	0	0	0	0	0	0	0	2	0	0
OTU_1899	Bacteria	Proteobacteria	Gammaproteobacteria	Gammaproteobacteria Incertae Sedis	Unknown Family	Marinicella	uncultured bacterium	0	0	0	0	10	0	0	0	0	0	1	0	0	0	0	0	0	3	0	0	1	6	4	0
OTU_19	Bacteria	Proteobacteria	Gammaproteobacteria	Betaproteobacteriales	Burkholderiaceae	Pelomonas	uncultured bacterium	132	2	4	2	5	13	0	0	2	0	0	0	0	13	66	93	61	107	21	113	232	173	111	0
OTU_1900	Bacteria	Actinobacteria	Acidimicrobiia	IMCC26256	uncultured bacterium	uncultured bacterium	uncultured bacterium	0	0	0	0	0	0	0	0	0	0	0	0	0	0	0	0	0	0	4	0	0	0	0	0
OTU_1901	Bacteria	Chloroflexi	Dehalococcoidia	SAR202 clade	Unclassified	Unclassified	Unclassified	0	0	2	0	0	0	0	0	1	0	0	0	0	1	5	0	2	0	0	0	0	0	0	0
OTU_1902	Bacteria	Proteobacteria	Gammaproteobacteria	EC3	uncultured gamma proteobacterium	uncultured gamma proteobacterium	uncultured gamma proteobacterium	0	0	0	0	0	0	0	0	0	0	0	0	0	0	0	0	0	0	2	0	0	0	0	0
OTU_1903	Bacteria	Proteobacteria	Deltaproteobacteria	Bdellovibrionales	Bdellovibrionaceae	OM27 clade	uncultured bacterium	0	0	0	0	0	0	0	0	0	0	0	0	0	0	1	0	0	0	7	0	0	0	0	0
OTU_1904	Bacteria	Bacteroidetes	Bacteroidia	Chitinophagales	Saprospiraceae	uncultured	Unclassified	0	0	0	0	0	0	0	0	0	0	0	0	0	0	0	5	0	0	0	0	0	0	0	0
OTU_1905	Bacteria	Proteobacteria	Alphaproteobacteria	Micavibrionales	uncultured	uncultured bacterium	uncultured bacterium	0	0	0	0	0	0	0	0	0	0	0	0	0	0	0	0	0	0	0	0	0	3	0	0
OTU_1906	Bacteria	Epsilonbacteraeota	Campylobacteria	Campylobacterales	Sulfurovaceae	Sulfurovum	uncultured bacterium	0	0	0	0	3	0	0	0	0	0	0	1	0	0	0	0	0	0	0	0	0	4	0	0
OTU_1907	Bacteria	Proteobacteria	Gammaproteobacteria	HOC36	marine metagenome	marine metagenome	marine metagenome	0	0	0	0	0	0	0	0	0	0	0	0	0	4	0	0	0	0	0	0	0	0	0	0
OTU_1908	Bacteria	Proteobacteria	Gammaproteobacteria	Unclassified	Unclassified	Unclassified	Unclassified	0	0	0	0	0	0	0	0	0	0	0	0	0	0	0	0	0	0	0	0	2	0	0	0
OTU_1909	Bacteria	Proteobacteria	Deltaproteobacteria	Myxococcales	P3OB-42	uncultured bacterium	uncultured bacterium	0	0	0	0	0	0	0	0	0	0	0	0	0	1	6	0	0	0	0	0	0	0	0	0
OTU_191	Bacteria	Planctomycetes	OM190	uncultured bacterium	uncultured bacterium	uncultured bacterium	uncultured bacterium	0	0	8	1	0	0	0	2	63	19	0	0	0	0	3	4	0	0	0	1	72	0	1	0
OTU_1910	Bacteria	Bacteroidetes	Bacteroidia	Flavobacteriales	NS9 marine group	uncultured marine bacterium	uncultured marine bacterium	0	3	0	0	0	0	0	3	0	0	0	0	0	0	0	0	0	0	0	0	0	0	6	0
OTU_1911	Bacteria	Acidobacteria	Subgroup 6	Unclassified	Unclassified	Unclassified	Unclassified	0	0	5	1	0	1	0	0	0	0	0	0	0	0	2	0	0	0	0	0	0	0	0	0
OTU_1912	Bacteria	Patescibacteria	Gracilibacteria	Candidatus Peregrinibacteria	uncultured bacterium	uncultured bacterium	uncultured bacterium	0	0	0	0	0	2	0	0	0	0	0	0	0	0	0	0	0	0	0	0	0	0	0	0
OTU_1913	Bacteria	Chloroflexi	JG30-KF-CM66	Unclassified	Unclassified	Unclassified	Unclassified	0	0	2	0	0	1	0	0	0	0	0	0	0	0	0	1	0	0	0	0	0	0	0	0
OTU_1914	Bacteria	Planctomycetes	Pla4 lineage	uncultured planctomycete	uncultured planctomycete	uncultured planctomycete	uncultured planctomycete	0	0	2	0	0	1	0	0	5	1	0	0	0	0	0	0	0	0	0	0	2	1	1	0
OTU_1917	Bacteria	Proteobacteria	Alphaproteobacteria	Micavibrionales	uncultured	uncultured bacterium	uncultured bacterium	0	0	0	0	0	4	0	0	0	0	0	0	0	0	2	0	0	0	0	0	0	0	0	0
OTU_1918	Bacteria	Actinobacteria	Acidimicrobiia	Actinomarinales	uncultured	uncultured bacterium	uncultured bacterium	0	0	0	0	0	0	0	0	0	0	0	4	0	0	0	0	0	0	0	0	0	0	0	0
OTU_1919	Bacteria	Proteobacteria	Gammaproteobacteria	SAR86 clade	metagenome	metagenome	metagenome	7	0	0	0	0	1	1	0	0	0	0	0	0	0	0	0	0	0	0	0	0	0	0	0
OTU_192	Bacteria	Planctomycetes	Phycisphaerae	Phycisphaerales	Phycisphaeraceae	CL500-3	uncultured Phycisphaeraceae bacterium	0	3	0	0	2	1	0	28	14	0	1	0	0	1	4	0	0	2	68	17	7	9	8	0
OTU_1920	Bacteria	Chloroflexi	Dehalococcoidia	SAR202 clade	Unclassified	Unclassified	Unclassified	0	0	0	0	0	0	0	0	0	0	0	1	0	0	3	3	0	1	0	0	1	0	0	0
OTU_1921	Bacteria	Proteobacteria	Gammaproteobacteria	Piscirickettsiales	Piscirickettsiaceae	Candidatus Endoecteinascidia	uncultured marine bacterium	4	1	1	0	0	0	0	0	0	0	0	0	1	0	0	0	0	0	0	0	0	0	0	0
OTU_1922	Bacteria	Proteobacteria	Gammaproteobacteria	Nitrosococcales	Methylophagaceae	Methylophaga	Methylophaga thalassica	0	0	0	0	0	0	0	0	6	0	0	0	0	0	0	0	0	0	0	0	0	0	0	0
OTU_1923	Bacteria	Actinobacteria	Acidimicrobiia	Microtrichales	Microtrichaceae	uncultured	uncultured Acidimicrobiales bacterium	0	0	0	0	0	0	0	0	0	0	2	0	0	0	0	0	0	0	0	0	0	0	0	0
OTU_1924	Bacteria	Proteobacteria	Deltaproteobacteria	Unclassified	Unclassified	Unclassified	Unclassified	0	0	0	0	0	0	0	0	0	0	0	0	0	4	0	0	0	0	0	0	0	0	0	0
OTU_1925	Bacteria	Actinobacteria	Actinobacteria	Corynebacteriales	Corynebacteriaceae	Corynebacterium 1	Corynebacterium doosanense CAU 212 = DSM 45436	0	0	0	0	0	0	0	0	0	0	0	0	0	0	0	0	0	0	0	0	0	0	2	0
OTU_1926	Bacteria	Chloroflexi	Dehalococcoidia	SAR202 clade	uncultured marine microorganism	uncultured marine microorganism	uncultured marine microorganism	0	0	0	0	0	0	0	0	0	0	0	0	0	2	0	0	0	0	0	0	0	0	0	0
OTU_1927	Bacteria	Actinobacteria	Acidimicrobiia	Microtrichales	Iamiaceae	Iamia	Unclassified	0	0	0	0	0	0	0	0	0	0	0	0	0	0	4	0	0	0	0	0	0	0	0	0
OTU_1928	Bacteria	Proteobacteria	Deltaproteobacteria	Myxococcales	Haliangiaceae	Haliangium	uncultured deep-sea bacterium	0	0	0	0	0	0	0	1	0	0	0	0	0	0	0	0	0	0	0	7	0	0	4	0
OTU_1929	Bacteria	Actinobacteria	Actinobacteria	Micrococcales	Microbacteriaceae	uncultured	marine metagenome	1	0	0	0	0	0	0	0	0	0	0	0	0	0	0	2	0	0	0	0	0	0	0	0
OTU_193	Bacteria	Proteobacteria	Alphaproteobacteria	Micavibrionales	Micavibrionaceae	uncultured	uncultured bacterium	0	0	0	0	5	2	0	0	0	0	0	0	0	0	0	3	12	10	0	0	0	0	0	0
OTU_1930	Bacteria	Verrucomicrobia	Verrucomicrobiae	Opitutales	Puniceicoccaceae	MB11C04 marine group	uncultured marine microorganism	0	3	2	0	0	0	0	0	0	0	0	0	0	0	4	0	0	0	0	0	0	0	0	0
OTU_1931	Bacteria	Actinobacteria	Actinobacteria	Corynebacteriales	Corynebacteriaceae	Corynebacterium 1	Corynebacterium callunae DSM 20147	0	0	0	0	0	0	0	0	0	0	0	0	0	0	0	0	0	4	0	0	0	0	0	0
OTU_1933	Bacteria	Proteobacteria	Gammaproteobacteria	MD2904-B13	uncultured bacterium	uncultured bacterium	uncultured bacterium	0	0	0	0	0	1	0	0	0	0	0	0	0	0	0	3	0	0	0	0	0	4	0	0
OTU_1934	Bacteria	Lentisphaerae	Lentisphaeria	Lentisphaerales	Lentisphaeraceae	Lentisphaera	Lentisphaera araneosa HTCC2155	0	0	0	0	0	0	0	0	0	0	0	0	1	3	0	0	0	0	0	0	0	0	1	0
OTU_1936	Bacteria	Planctomycetes	BD7-11	uncultured bacterium	uncultured bacterium	uncultured bacterium	uncultured bacterium	0	0	0	0	0	0	0	0	0	0	0	0	0	0	0	0	0	0	0	0	0	2	3	0
OTU_1937	Bacteria	Bacteroidetes	Bacteroidia	Flavobacteriales	Flavobacteriaceae	Gilvibacter	uncultured bacterium	0	0	0	0	0	0	0	0	0	0	1	0	0	0	0	0	0	0	4	0	0	0	0	0
OTU_1938	Bacteria	Proteobacteria	Gammaproteobacteria	Cellvibrionales	BD2-7	uncultured bacterium	uncultured bacterium	0	0	0	0	0	0	0	0	0	0	0	0	0	0	0	0	0	0	0	2	0	0	1	0
OTU_1939	Bacteria	Proteobacteria	Gammaproteobacteria	Enterobacteriales	Enterobacteriaceae	Citrobacter	Citrobacter freundii	0	0	0	0	0	0	0	0	0	4	0	2	0	0	0	0	0	0	0	2	0	0	1	0
OTU_1940	Bacteria	Proteobacteria	Gammaproteobacteria	Vibrionales	Vibrionaceae	Vibrio	Vibrio parahaemolyticus	1	1	0	0	0	1	0	2	0	0	0	8	0	0	2	1	0	0	7	2	2	1	0	0
OTU_1941	Bacteria	Proteobacteria	Alphaproteobacteria	Micavibrionales	uncultured	uncultured bacterium	uncultured bacterium	0	0	0	0	1	0	0	0	0	0	0	0	0	0	0	0	0	0	0	0	2	0	0	0
OTU_1942	Bacteria	Proteobacteria	Alphaproteobacteria	Sneathiellales	Sneathiellaceae	AT-s3-44	uncultured bacterium	0	2	2	0	0	0	0	0	0	0	0	0	0	0	3	0	3	0	0	0	0	0	0	0
OTU_1943	Bacteria	Proteobacteria	Gammaproteobacteria	EC3	uncultured bacterium	uncultured bacterium	uncultured bacterium	0	0	0	0	0	0	0	0	0	0	0	0	0	0	0	0	0	0	4	0	0	0	0	0
OTU_1944	Bacteria	Nitrospinae	Nitrospinia	Nitrospinales	Nitrospinaceae	Nitrospina	hydrothermal vent metagenome	0	0	0	0	0	0	0	0	0	0	0	0	0	5	0	0	0	0	0	0	0	0	0	0
OTU_1945	Bacteria	Proteobacteria	Gammaproteobacteria	Betaproteobacteriales	Burkholderiaceae	Burkholderia-Caballeronia-Paraburkholderia	uncultured beta proteobacterium	0	0	0	0	0	0	0	0	2	1	0	0	0	0	0	0	0	0	0	0	0	0	0	0
OTU_1946	Bacteria	Chloroflexi	Ktedonobacteria	Ktedonobacterales	Ktedonobacteraceae	uncultured	uncultured bacterium	0	0	0	0	0	0	0	0	0	0	0	0	0	0	0	0	0	0	0	0	4	0	0	0
OTU_1947	Bacteria	Acidobacteria	Subgroup 6	Unclassified	Unclassified	Unclassified	Unclassified	0	0	3	0	0	0	0	0	0	0	0	0	0	0	0	0	0	0	0	0	0	0	0	0
OTU_1948	Bacteria	Chloroflexi	Dehalococcoidia	SAR202 clade	uncultured sediment bacterium	uncultured sediment bacterium	uncultured sediment bacterium	0	0	7	1	0	0	0	0	0	0	0	0	0	0	0	0	0	4	0	0	0	0	0	0
OTU_1949	Bacteria	Proteobacteria	Gammaproteobacteria	Coxiellales	Coxiellaceae	Coxiella	uncultured marine bacterium	0	0	0	0	1	0	0	0	0	0	0	0	0	0	0	2	0	0	0	0	0	0	0	0
OTU_195	Bacteria	Chloroflexi	Dehalococcoidia	SAR202 clade	uncultured Chloroflexi bacterium	uncultured Chloroflexi bacterium	uncultured Chloroflexi bacterium	0	0	16	1	12	11	0	0	21	0	3	0	0	0	9	10	0	7	0	0	0	11	2	0
OTU_1950	Bacteria	Unclassified	Unclassified	Unclassified	Unclassified	Unclassified	Unclassified	0	0	0	0	0	0	0	0	0	0	0	0	0	0	0	0	0	0	0	4	0	0	0	0
OTU_1951	Bacteria	Marinimicrobia (SAR406 clade)	hydrothermal vent metagenome	hydrothermal vent metagenome	hydrothermal vent metagenome	hydrothermal vent metagenome	hydrothermal vent metagenome	0	0	0	0	0	0	0	0	0	0	0	0	0	12	0	0	0	0	0	0	0	0	0	0
OTU_1953	Bacteria	Proteobacteria	Alphaproteobacteria	Rhodobacterales	Rhodobacteraceae	Ruegeria	uncultured bacterium	1	1	0	3	0	3	0	5	0	1	0	1	0	1	1	1	1	0	11	1	0	0	0	0
OTU_1954	Bacteria	Proteobacteria	Gammaproteobacteria	Oceanospirillales	Halomonadaceae	Halomonas	Halomonas zincidurans B6	0	0	0	1	2	0	0	0	0	0	3	1	0	0	0	0	0	0	0	0	0	0	0	0
OTU_1955	Bacteria	Proteobacteria	Gammaproteobacteria	HOC36	uncultured bacterium HF0770_27E13	uncultured bacterium HF0770_27E13	uncultured bacterium HF0770_27E13	0	0	0	0	0	0	0	0	0	0	0	0	0	3	0	0	0	0	0	0	0	0	0	0
OTU_1956	Bacteria	Proteobacteria	Alphaproteobacteria	SAR11 clade	Clade III	alpha proteobacterium HIMB114	alpha proteobacterium HIMB114	1	0	2	0	0	0	0	0	0	0	0	0	0	0	0	0	0	0	0	0	0	0	0	0
OTU_1957	Bacteria	Cyanobacteria	Oxyphotobacteria	Synechococcales	Cyanobiaceae	Cyanobium PCC-6307	Synechococcus sp. Tous	0	0	0	0	0	0	3	0	0	0	0	0	0	0	0	0	0	0	0	0	0	0	0	0
OTU_1958	Bacteria	Proteobacteria	Alphaproteobacteria	Rhizobiales	Beijerinckiaceae	Methylobacterium	uncultured bacterium	22	3	3	15	23	10	0	40	128	47	32	60	6	1	17	53	21	10	167	100	161	82	163	0
OTU_1959	Bacteria	Planctomycetes	Phycisphaerae	Phycisphaerales	Phycisphaeraceae	CL500-3	uncultured Phycisphaeraceae bacterium	0	0	1	0	0	0	1	5	2	0	0	0	0	0	0	0	0	0	17	2	0	0	1	0
OTU_1960	Bacteria	Proteobacteria	Deltaproteobacteria	Bdellovibrionales	Bdellovibrionaceae	OM27 clade	uncultured bacterium	0	0	0	0	0	1	0	0	0	0	0	0	0	0	0	0	0	0	0	0	0	1	0	0
OTU_1962	Bacteria	Planctomycetes	Phycisphaerae	Phycisphaerales	Phycisphaeraceae	CL500-3	uncultured Phycisphaeraceae bacterium	0	0	0	0	0	0	1	0	1	0	0	0	0	0	0	0	0	1	13	7	0	0	0	0
OTU_1963	Bacteria	Marinimicrobia (SAR406 clade)	uncultured marine bacterium	uncultured marine bacterium	uncultured marine bacterium	uncultured marine bacterium	uncultured marine bacterium	3	11	2	2	0	2	1	1	0	0	0	0	7	1	6	0	1	0	0	0	0	0	0	0
OTU_1964	Bacteria	Bacteroidetes	Bacteroidia	Flavobacteriales	Cryomorphaceae	uncultured	uncultured Owenweeksia sp.	0	0	0	0	0	0	0	0	0	0	3	6	0	0	0	0	0	0	0	0	0	0	0	0
OTU_1965	Bacteria	Margulisbacteria	uncultured bacterium	uncultured bacterium	uncultured bacterium	uncultured bacterium	uncultured bacterium	4	0	0	0	0	0	0	0	0	0	0	0	0	0	0	0	0	0	0	0	0	0	0	0
OTU_1966	Bacteria	Bacteroidetes	Bacteroidia	Bacteroidales	Porphyromonadaceae	Porphyromonas	Porphyromonas sp. HMSC077F02	0	0	0	0	0	0	0	0	0	0	0	0	0	0	0	0	5	0	0	0	0	0	0	0
OTU_1967	Bacteria	Marinimicrobia (SAR406 clade)	Marinimicrobia bacterium SCGC AAA003-E22	Marinimicrobia bacterium SCGC AAA003-E22	Marinimicrobia bacterium SCGC AAA003-E22	Marinimicrobia bacterium SCGC AAA003-E22	Marinimicrobia bacterium SCGC AAA003-E22	0	2	9	0	0	0	0	0	3	0	0	0	0	5	8	0	0	0	0	0	4	0	0	0
OTU_1968	Bacteria	Planctomycetes	Phycisphaerae	Phycisphaerales	Phycisphaeraceae	Unclassified	Unclassified	0	0	0	0	0	0	0	0	0	0	0	0	0	0	0	0	0	0	0	0	0	3	0	0
OTU_1969	Bacteria	Bacteroidetes	Bacteroidia	Cytophagales	Cyclobacteriaceae	Marivirga	uncultured bacterium	0	0	0	0	0	0	0	0	0	0	1	0	0	0	6	0	0	0	0	0	2	0	0	0
OTU_197	Bacteria	Chloroflexi	Dehalococcoidia	SAR202 clade	uncultured bacterium	uncultured bacterium	uncultured bacterium	0	52	42	2	2	7	0	4	22	0	0	0	0	29	53	5	4	1	1	14	12	0	0	0
OTU_1970	Bacteria	Proteobacteria	Alphaproteobacteria	Rhizobiales	KF-JG30-B3	uncultured bacterium KM4-1-D1	uncultured bacterium KM4-1-D1	0	0	2	0	1	0	0	0	0	0	0	0	0	0	1	0	1	0	0	0	0	0	0	0
OTU_1971	Bacteria	Proteobacteria	Gammaproteobacteria	Betaproteobacteriales	Methylophilaceae	OM43 clade	uncultured bacterium ARCTIC32_A_02	0	0	0	0	0	1	0	0	0	0	0	0	0	0	5	4	0	0	0	0	0	0	0	0
OTU_1972	Bacteria	Proteobacteria	Gammaproteobacteria	Coxiellales	Coxiellaceae	Coxiella	Unclassified	0	0	0	1	0	0	0	0	0	0	0	0	0	0	0	3	1	0	0	0	0	0	0	0
OTU_1973	Bacteria	Chloroflexi	Dehalococcoidia	SAR202 clade	Unclassified	Unclassified	Unclassified	0	0	2	0	0	0	0	0	0	0	0	0	0	0	0	0	0	0	0	0	0	0	0	0
OTU_1974	Bacteria	Proteobacteria	Deltaproteobacteria	NB1-j	uncultured bacterium	uncultured bacterium	uncultured bacterium	0	0	2	0	0	1	0	0	0	0	0	0	0	0	0	0	0	0	0	0	0	0	0	0
OTU_1975	Bacteria	Proteobacteria	Deltaproteobacteria	Oligoflexales	Oligoflexaceae	uncultured	marine metagenome	0	0	12	0	0	0	0	0	0	0	0	0	0	0	1	0	0	0	0	0	0	0	0	0
OTU_1976	Bacteria	Proteobacteria	Gammaproteobacteria	Piscirickettsiales	Piscirickettsiaceae	Candidatus Endoecteinascidia	uncultured marine bacterium	0	1	5	0	1	1	0	0	0	0	0	0	0	0	4	0	0	1	0	0	0	0	0	0
OTU_1977	Bacteria	Proteobacteria	Alphaproteobacteria	Rhodobacterales	Rhodobacteraceae	Halocynthiibacter	uncultured bacterium	0	0	0	0	0	0	0	0	2	0	0	0	0	0	0	0	2	0	0	0	0	1	0	2
OTU_1978	Bacteria	Planctomycetes	Planctomycetacia	Planctomycetales	uncultured	Unclassified	Unclassified	0	0	0	2	0	1	0	0	0	0	0	0	0	0	0	1	0	0	0	0	0	0	0	0
OTU_1979	Bacteria	Spirochaetes	Spirochaetia	Spirochaetales	Spirochaetaceae	Spirochaeta 2	marine metagenome	0	0	2	0	0	0	0	0	3	0	0	0	0	0	0	0	0	0	0	0	0	0	0	0
OTU_198	Bacteria	Proteobacteria	Alphaproteobacteria	Sphingomonadales	Sphingomonadaceae	Altererythrobacter	uncultured alpha proteobacterium	11	3	3	24	42	17	2	6	31	6	13	48	29	8	4	15	11	5	42	106	15	8	17	4
OTU_1980	Bacteria	Proteobacteria	Gammaproteobacteria	Cellvibrionales	Halieaceae	Parahaliea	uncultured gamma proteobacterium	6	0	0	0	0	0	0	0	0	0	0	0	0	0	0	0	0	0	0	0	0	0	0	0
OTU_1981	Bacteria	Bacteroidetes	Bacteroidia	Flavobacteriales	Flavobacteriaceae	Winogradskyella	Unclassified	0	0	0	0	0	0	0	0	0	0	2	0	0	0	0	0	0	0	0	0	1	0	0	0
OTU_1983	Bacteria	Proteobacteria	Alphaproteobacteria	SAR11 clade	Clade I	uncultured	uncultured bacterium	0	22	19	1	1	8	0	0	14	0	4	0	0	11	26	5	1	1	0	1	10	3	1	0
OTU_1984	Bacteria	Proteobacteria	Deltaproteobacteria	Oligoflexales	Oligoflexaceae	uncultured	uncultured bacterium	10	0	0	0	0	0	0	0	0	0	0	0	0	0	0	0	0	0	0	0	0	0	0	0
OTU_1985	Bacteria	Proteobacteria	Gammaproteobacteria	Cellvibrionales	Halieaceae	OM60(NOR5) clade	uncultured gamma proteobacterium	0	0	0	0	0	0	0	0	0	0	0	0	0	0	0	0	0	0	0	5	0	0	0	0
OTU_1986	Bacteria	Omnitrophicaeota	uncultured bacterium	uncultured bacterium	uncultured bacterium	uncultured bacterium	uncultured bacterium	0	0	0	0	0	9	0	0	0	0	0	0	0	0	0	0	0	0	0	0	0	0	0	0
OTU_1987	Bacteria	Proteobacteria	Deltaproteobacteria	Bdellovibrionales	Bacteriovoracaceae	uncultured	uncultured bacterium	4	4	0	0	0	0	0	1	0	0	0	0	0	3	2	1	0	0	0	0	0	0	1	0
OTU_1988	Bacteria	Nitrospirae	Nitrospira	Nitrospirales	Nitrospiraceae	Nitrospira	uncultured Nitrospirae bacterium	0	0	0	0	2	1	0	0	0	0	0	0	0	4	7	2	0	6	0	0	0	0	1	0
OTU_1989	Bacteria	Marinimicrobia (SAR406 clade)	Marinimicrobia bacterium JGI 0000113-D11	Marinimicrobia bacterium JGI 0000113-D11	Marinimicrobia bacterium JGI 0000113-D11	Marinimicrobia bacterium JGI 0000113-D11	Marinimicrobia bacterium JGI 0000113-D11	0	15	0	0	0	0	0	0	0	0	0	0	0	2	0	0	0	0	0	0	0	0	0	0
OTU_199	Bacteria	Planctomycetes	Phycisphaerae	Phycisphaerales	Phycisphaeraceae	SM1A02	marine metagenome	0	0	13	0	0	0	0	0	31	0	0	0	0	0	0	0	0	0	0	8	0	0	0	0
OTU_1990	Bacteria	Proteobacteria	Alphaproteobacteria	Rhodospirillales	AEGEAN-169 marine group	uncultured bacterium	uncultured bacterium	0	6	1	0	0	0	0	0	0	0	0	0	0	4	1	0	0	1	0	1	0	0	0	0
OTU_1991	Bacteria	Chloroflexi	Dehalococcoidia	SAR202 clade	uncultured gamma proteobacterium	uncultured gamma proteobacterium	uncultured gamma proteobacterium	0	0	0	0	0	0	0	0	0	0	0	0	0	0	0	0	0	6	0	0	0	0	0	0
OTU_1992	Bacteria	Acidobacteria	Subgroup 21	uncultured Acidobacterium sp.	uncultured Acidobacterium sp.	uncultured Acidobacterium sp.	uncultured Acidobacterium sp.	0	0	0	0	4	0	0	0	0	0	0	0	0	0	3	0	0	0	0	0	0	0	0	0
OTU_1993	Bacteria	Cyanobacteria	Melainabacteria	Obscuribacterales	uncultured bacterium	uncultured bacterium	uncultured bacterium	0	0	0	0	0	0	0	0	0	0	0	0	0	0	0	0	0	0	0	0	3	0	0	0
OTU_1994	Bacteria	Planctomycetes	BD7-11	uncultured bacterium	uncultured bacterium	uncultured bacterium	uncultured bacterium	0	0	0	0	0	0	0	0	0	0	0	0	0	0	4	0	0	0	0	0	3	0	0	0
OTU_1995	Bacteria	Cyanobacteria	Oxyphotobacteria	Synechococcales	Cyanobiaceae	Prochlorococcus MIT9313	uncultured marine cyanobacterium	7	0	0	0	0	2	0	0	0	0	0	0	8	0	0	0	0	1	0	0	0	2	33	0
OTU_1996	Bacteria	Marinimicrobia (SAR406 clade)	Unclassified	Unclassified	Unclassified	Unclassified	Unclassified	0	0	3	0	0	0	0	0	0	0	0	0	0	0	0	0	0	0	0	0	0	0	0	0
OTU_1997	Bacteria	Marinimicrobia (SAR406 clade)	uncultured marine microorganism	uncultured marine microorganism	uncultured marine microorganism	uncultured marine microorganism	uncultured marine microorganism	0	0	0	0	0	0	0	1	0	0	0	0	0	0	0	0	0	0	0	0	0	0	17	0
OTU_1998	Bacteria	Chloroflexi	Dehalococcoidia	SAR202 clade	uncultured bacterium	uncultured bacterium	uncultured bacterium	0	0	0	0	0	4	0	0	0	0	0	0	0	0	0	0	0	0	0	0	0	0	0	0
OTU_1999	Bacteria	Verrucomicrobia	Verrucomicrobiae	Opitutales	Puniceicoccaceae	MB11C04 marine group	uncultured bacterium	0	1	0	0	0	0	0	0	0	0	0	0	0	1	4	0	0	0	0	0	0	0	0	0
OTU_2	Bacteria	Proteobacteria	Alphaproteobacteria	Rhizobiales	Rhizobiaceae	Hoeflea	Unclassified	0	0	0	0	3	1	0	0	0	1	8	1	0	0	0	0	0	0	0	0	0	0	0	12495
OTU_20	Bacteria	Proteobacteria	Alphaproteobacteria	Rhizobiales	Xanthobacteraceae	Bradyrhizobium	Bradyrhizobium japonicum	380	4	5	1	19	10	0	0	4	0	3	9	4	3	18	85	52	17	16	12	5	12	0	0
OTU_200	Bacteria	Proteobacteria	Gammaproteobacteria	Betaproteobacteriales	Rhodocyclaceae	Denitromonas	uncultured Denitromonas sp.	0	0	0	0	0	0	0	0	1	0	0	0	0	0	0	0	1	0	5	0	86	0	29	0
OTU_2000	Bacteria	Proteobacteria	Gammaproteobacteria	Gammaproteobacteria Incertae Sedis	Unknown Family	uncultured	uncultured bacterium	0	0	0	0	0	0	0	0	0	0	0	3	0	0	0	0	0	0	0	0	0	0	0	0
OTU_2001	Bacteria	Proteobacteria	Alphaproteobacteria	Unclassified	Unclassified	Unclassified	Unclassified	0	0	0	0	0	0	0	0	0	0	0	0	0	0	0	2	3	0	0	0	0	0	2	0
OTU_2002	Bacteria	Firmicutes	Bacilli	Bacillales	Sporolactobacillaceae	Salipaludibacillus	uncultured bacterium	0	0	0	0	0	0	0	0	0	0	0	0	0	0	0	0	3	0	0	0	0	0	0	0
OTU_2003	Bacteria	Bacteroidetes	Bacteroidia	Flavobacteriales	Crocinitomicaceae	Crocinitomix	Unclassified	0	0	0	0	0	1	0	0	0	0	0	0	0	0	0	0	0	0	0	3	0	0	0	0
OTU_2004	Bacteria	Actinobacteria	Actinobacteria	Frankiales	uncultured	uncultured bacterium	uncultured bacterium	0	0	0	0	0	0	0	0	0	0	0	0	0	0	0	0	2	0	0	0	0	0	0	0
OTU_2005	Bacteria	Chloroflexi	Dehalococcoidia	SAR202 clade	uncultured marine microorganism	uncultured marine microorganism	uncultured marine microorganism	0	0	1	0	0	1	0	0	0	0	0	0	0	0	0	0	2	2	0	0	0	0	0	0
OTU_2006	Bacteria	Proteobacteria	Gammaproteobacteria	Betaproteobacteriales	Neisseriaceae	Conchiformibius	uncultured bacterium	0	0	0	0	2	0	0	0	0	0	0	0	0	0	0	0	0	0	0	0	0	0	0	0
OTU_2007	Bacteria	Proteobacteria	Deltaproteobacteria	Oligoflexales	0319-6G20	Unclassified	Unclassified	0	0	0	0	0	0	0	0	0	0	0	0	0	0	0	0	5	1	0	0	0	0	0	0
OTU_2008	Bacteria	Marinimicrobia (SAR406 clade)	Unclassified	Unclassified	Unclassified	Unclassified	Unclassified	0	0	2	0	3	0	0	0	0	0	0	0	0	0	1	0	0	0	0	0	0	0	0	0
OTU_2009	Bacteria	Bacteroidetes	Bacteroidia	Flavobacteriales	Unclassified	Unclassified	Unclassified	0	0	0	0	0	0	0	0	0	0	0	0	0	0	3	0	0	0	0	0	0	0	0	0
OTU_201	Bacteria	Marinimicrobia (SAR406 clade)	hydrothermal vent metagenome	hydrothermal vent metagenome	hydrothermal vent metagenome	hydrothermal vent metagenome	hydrothermal vent metagenome	0	162	282	1	23	43	0	0	3	0	0	0	1	131	251	21	9	37	0	2	1	0	0	0
OTU_2010	Bacteria	Bacteroidetes	Bacteroidia	Flavobacteriales	Flavobacteriaceae	Aquibacter	uncultured bacterium	0	0	0	0	0	0	0	0	0	0	0	7	0	0	0	0	0	0	0	0	0	0	0	0
OTU_2011	Bacteria	Proteobacteria	Alphaproteobacteria	Rhodobacterales	Rhodobacteraceae	uncultured	uncultured Sulfitobacter sp.	6	48	37	317	127	44	21	44	83	43	19	36	10	5	8	12	22	10	76	141	15	12	4	3
OTU_2012	Bacteria	Firmicutes	Clostridia	Clostridiales	Family XI	Ezakiella	uncultured bacterium	0	0	0	0	0	0	0	0	0	0	0	0	0	0	0	2	4	0	0	1	0	0	0	0
OTU_2013	Bacteria	Proteobacteria	Gammaproteobacteria	Gammaproteobacteria Incertae Sedis	Unknown Family	Wenzhouxiangella	Wenzhouxiangella marina	0	0	0	0	0	0	0	0	0	0	0	0	0	0	0	0	0	0	0	0	6	0	0	0
OTU_2014	Bacteria	Marinimicrobia (SAR406 clade)	uncultured bacterium	uncultured bacterium	uncultured bacterium	uncultured bacterium	uncultured bacterium	0	2	5	0	1	3	0	0	0	0	0	0	0	5	7	0	0	0	0	0	4	0	1	0
OTU_2015	Bacteria	Actinobacteria	Thermoleophilia	Gaiellales	uncultured	uncultured bacterium	uncultured bacterium	0	0	0	0	0	0	0	0	0	9	0	0	0	0	0	0	0	0	0	0	0	0	0	0
OTU_2016	Bacteria	Planctomycetes	Planctomycetacia	Pirellulales	Pirellulaceae	uncultured	marine metagenome	0	0	1	0	0	0	0	0	0	0	0	0	0	0	2	0	0	0	0	0	0	0	0	0
OTU_2018	Bacteria	Proteobacteria	Alphaproteobacteria	Unclassified	Unclassified	Unclassified	Unclassified	0	0	0	0	0	0	0	0	0	0	0	9	1	0	0	0	0	0	22	0	0	0	0	0
OTU_2019	Bacteria	Proteobacteria	Alphaproteobacteria	Puniceispirillales	SAR116 clade	uncultured bacterium	uncultured bacterium	0	1	0	0	0	0	0	0	0	0	0	0	0	2	0	0	0	0	0	1	0	0	0	0
OTU_202	Bacteria	Proteobacteria	Alphaproteobacteria	Parvibaculales	PS1 clade	marine metagenome	marine metagenome	58	0	0	0	0	1	0	0	0	0	0	0	0	0	0	0	0	0	0	0	0	2	0	0
OTU_2020	Bacteria	Proteobacteria	Gammaproteobacteria	Alteromonadales	Marinobacteraceae	Marinobacter	uncultured Marinobacter sp.	3	1	0	4	0	0	0	1	3	2	0	0	0	1	0	0	0	0	0	4	1	0	3	45
OTU_2021	Bacteria	Planctomycetes	Phycisphaerae	Phycisphaerales	Phycisphaeraceae	uncultured	uncultured bacterium	0	3	0	0	0	0	0	0	0	0	0	0	0	0	0	0	0	0	0	0	0	0	0	0
OTU_2022	Bacteria	Proteobacteria	Deltaproteobacteria	Unclassified	Unclassified	Unclassified	Unclassified	0	0	2	0	0	2	0	0	0	0	0	0	0	0	3	0	0	0	0	0	0	0	0	0
OTU_2023	Bacteria	Marinimicrobia (SAR406 clade)	Unclassified	Unclassified	Unclassified	Unclassified	Unclassified	0	1	6	0	0	0	0	0	0	0	0	0	0	0	4	0	0	0	0	1	0	0	0	0
OTU_2024	Bacteria	Proteobacteria	Gammaproteobacteria	Betaproteobacteriales	Burkholderiaceae	Ralstonia	uncultured Ralstonia sp.	0	0	0	0	0	0	0	0	0	1	1	0	0	0	0	0	0	0	0	0	1	1	5	0
OTU_2025	Bacteria	Acidobacteria	Subgroup 21	uncultured Acidobacterium sp.	uncultured Acidobacterium sp.	uncultured Acidobacterium sp.	uncultured Acidobacterium sp.	0	0	0	1	0	2	0	0	0	0	0	0	0	0	0	0	0	0	0	0	0	0	0	0
OTU_2026	Bacteria	Proteobacteria	Alphaproteobacteria	Rhizobiales	Rhizobiaceae	Pseudahrensia	uncultured bacterium	0	0	0	0	0	1	0	0	0	0	0	0	0	0	0	0	0	0	0	0	0	0	2	0
OTU_2027	Bacteria	Planctomycetes	Planctomycetacia	Pirellulales	Pirellulaceae	Rhodopirellula	uncultured bacterium	0	0	0	0	0	0	0	0	0	0	0	0	0	0	0	0	1	0	0	0	1	0	0	0
OTU_2028	Bacteria	Bacteroidetes	Rhodothermia	Rhodothermales	Rhodothermaceae	uncultured	uncultured bacterium	0	0	0	0	0	0	0	0	0	0	0	0	0	0	0	0	0	0	0	0	0	0	0	2
OTU_2029	Bacteria	Bacteroidetes	Bacteroidia	Flavobacteriales	Flavobacteriaceae	uncultured	uncultured deep-sea bacterium	0	0	0	0	0	2	0	0	0	0	0	0	0	0	0	0	0	2	0	0	0	0	0	0
OTU_203	Bacteria	Proteobacteria	Alphaproteobacteria	Sphingomonadales	Sphingomonadaceae	Novosphingobium	Novosphingobium sp. MBES04	0	1	0	0	3	11	0	0	0	0	0	9	1	0	0	0	0	9	2	0	0	1	13	0
OTU_2030	Bacteria	Chloroflexi	Dehalococcoidia	SAR202 clade	uncultured Thermomicrobium sp.	uncultured Thermomicrobium sp.	uncultured Thermomicrobium sp.	0	0	0	0	0	0	0	0	0	0	0	0	0	2	0	0	0	0	0	0	0	0	0	0
OTU_2031	Bacteria	Bacteroidetes	Bacteroidia	Flavobacteriales	Flavobacteriaceae	NS2b marine group	uncultured marine bacterium	0	0	0	0	0	0	2	2	4	0	0	0	9	0	0	0	0	0	1	0	0	0	0	0
OTU_2032	Bacteria	Chloroflexi	Dehalococcoidia	SAR202 clade	uncultured Chloroflexi bacterium	uncultured Chloroflexi bacterium	uncultured Chloroflexi bacterium	0	3	0	1	0	1	0	0	0	0	0	0	0	4	3	1	0	0	0	0	0	0	0	0
OTU_2033	Bacteria	Bacteroidetes	Bacteroidia	Chitinophagales	Saprospiraceae	uncultured	uncultured bacterium	0	0	0	0	0	0	0	0	0	0	0	1	0	0	0	0	0	0	0	2	0	0	3	0
OTU_2034	Bacteria	Proteobacteria	Gammaproteobacteria	Alteromonadales	Marinobacteraceae	Marinobacter	uncultured bacterium	2	0	3	0	0	4	0	3	12	1	0	3	0	0	0	0	0	3	0	15	6	1	4	1
OTU_2035	Bacteria	Proteobacteria	Alphaproteobacteria	Rickettsiales	Rickettsiaceae	uncultured	uncultured bacterium	0	0	0	0	0	0	0	0	0	0	0	0	0	0	0	0	0	0	0	5	0	0	0	0
OTU_2036	Bacteria	Proteobacteria	Deltaproteobacteria	PB19	Unclassified	Unclassified	Unclassified	0	0	1	0	0	0	0	0	7	0	0	0	0	0	0	0	0	0	0	0	4	0	0	0
OTU_2037	Bacteria	Epsilonbacteraeota	Campylobacteria	Campylobacterales	Sulfurovaceae	Sulfurovum	uncultured bacterium	0	0	0	0	3	3	0	0	0	0	0	0	0	0	0	0	0	0	0	0	0	0	0	0
OTU_2038	Bacteria	Proteobacteria	Deltaproteobacteria	Desulfuromonadales	Unclassified	Unclassified	Unclassified	0	1	0	0	0	1	0	0	2	0	0	0	0	0	0	0	0	0	0	1	7	0	0	0
OTU_2039	Bacteria	Planctomycetes	Phycisphaerae	Phycisphaerales	Phycisphaeraceae	CL500-3	uncultured Phycisphaeraceae bacterium	0	0	0	0	0	0	0	10	7	0	1	0	0	2	1	0	0	0	12	6	2	0	0	0
OTU_204	Bacteria	Proteobacteria	Alphaproteobacteria	Puniceispirillales	SAR116 clade	uncultured proteobacterium	uncultured proteobacterium	0	2	19	0	2	0	0	0	43	0	1	0	0	0	7	0	2	0	0	12	17	13	4	0
OTU_2040	Bacteria	Proteobacteria	Gammaproteobacteria	SAR86 clade	uncultured gamma proteobacterium HF4000_19M20	uncultured gamma proteobacterium HF4000_19M20	uncultured gamma proteobacterium HF4000_19M20	0	5	0	0	0	0	0	0	0	0	0	0	0	3	2	0	0	0	0	0	0	0	0	0
OTU_2041	Bacteria	Proteobacteria	Deltaproteobacteria	Myxococcales	P3OB-42	uncultured delta proteobacterium	uncultured delta proteobacterium	0	0	0	0	0	0	0	3	0	0	0	0	0	0	0	0	0	0	0	6	0	0	0	0
OTU_2042	Bacteria	Planctomycetes	Planctomycetacia	Planctomycetales	uncultured	uncultured bacterium HF0500_40D21	uncultured bacterium HF0500_40D21	0	8	0	0	0	0	0	0	0	0	0	0	0	0	0	0	0	0	0	0	0	0	0	0
OTU_2043	Bacteria	Acidobacteria	Subgroup 21	Unclassified	Unclassified	Unclassified	Unclassified	0	0	0	2	0	0	0	0	0	0	0	0	0	0	1	2	0	0	0	0	0	0	0	0
OTU_2044	Bacteria	Bacteroidetes	Rhodothermia	Rhodothermales	Rhodothermaceae	Rubrivirga	Rubrivirga profundi	0	0	0	5	6	1	0	0	0	0	0	1	0	0	2	0	0	0	0	0	0	2	0	0
OTU_2045	Bacteria	Marinimicrobia (SAR406 clade)	marine metagenome	marine metagenome	marine metagenome	marine metagenome	marine metagenome	0	7	21	0	1	1	0	0	0	0	0	0	0	2	23	5	2	1	0	0	0	0	0	0
OTU_2046	Bacteria	Bacteroidetes	Bacteroidia	Flavobacteriales	Crocinitomicaceae	Fluviicola	uncultured Bacteroidetes bacterium	0	0	0	0	0	2	0	0	0	0	0	0	0	0	0	0	0	0	0	0	0	0	0	0
OTU_2047	Bacteria	Margulisbacteria	uncultured marine bacterium	uncultured marine bacterium	uncultured marine bacterium	uncultured marine bacterium	uncultured marine bacterium	0	0	0	0	0	0	0	0	0	0	0	0	0	0	0	0	0	3	0	0	0	0	0	0
OTU_2048	Bacteria	Marinimicrobia (SAR406 clade)	uncultured bacterium	uncultured bacterium	uncultured bacterium	uncultured bacterium	uncultured bacterium	0	0	1	0	7	11	0	0	0	0	0	0	0	0	0	3	3	5	0	0	0	0	0	0
OTU_2049	Bacteria	Patescibacteria	Parcubacteria	Candidatus Campbellbacteria	Unclassified	Unclassified	Unclassified	0	0	0	0	4	0	0	0	0	0	0	0	0	0	0	0	0	0	0	0	0	0	0	0
OTU_205	Bacteria	Bacteroidetes	Bacteroidia	Cytophagales	Cyclobacteriaceae	Marinoscillum	uncultured marine bacterium	75	11	1	0	14	0	6	0	3	0	0	0	64	4	0	0	0	1	0	0	0	0	40	0
OTU_2050	Bacteria	Planctomycetes	Pla3 lineage	Unclassified	Unclassified	Unclassified	Unclassified	0	0	0	0	0	0	0	0	3	0	0	0	0	0	0	0	0	0	0	0	0	0	0	0
OTU_2051	Bacteria	Firmicutes	Clostridia	Clostridiales	Clostridiaceae 1	Clostridium sensu stricto 1	Clostridium butyricum	0	0	0	0	0	0	0	0	0	0	0	0	0	0	0	0	0	0	0	3	5	0	0	0
OTU_2052	Bacteria	Firmicutes	Bacilli	Lactobacillales	Streptococcaceae	Streptococcus	Streptococcus anginosus subsp. anginosus	0	0	0	0	0	0	0	0	0	0	0	0	0	0	0	0	0	0	0	0	0	0	3	0
OTU_2053	Bacteria	Proteobacteria	Gammaproteobacteria	Coxiellales	Coxiellaceae	Coxiella	uncultured bacterium	0	1	1	0	0	3	1	0	0	0	0	0	5	0	0	0	0	0	0	0	3	0	0	0
OTU_2055	Bacteria	Actinobacteria	Acidimicrobiia	Actinomarinales	Actinomarinaceae	Candidatus Actinomarina	actinobacterium SCGC AAA015-M09	0	0	0	0	0	0	0	0	0	0	0	0	7	0	0	0	0	0	0	0	0	0	0	0
OTU_2058	Bacteria	Proteobacteria	Alphaproteobacteria	SAR11 clade	Clade II	uncultured bacterium	uncultured bacterium	16	0	0	0	0	0	2	0	0	0	0	0	1	4	0	0	0	1	2	0	0	0	0	0
OTU_206	Bacteria	Proteobacteria	Alphaproteobacteria	Rhodobacterales	Rhodobacteraceae	Ascidiaceihabitans	uncultured organism	24	1	5	0	1	2	7	1	1	0	0	1	6	3	0	1	0	0	8	0	0	0	0	0
OTU_2060	Bacteria	Actinobacteria	Acidimicrobiia	Actinomarinales	Actinomarinaceae	Candidatus Actinomarina	Unclassified	4	0	0	0	0	0	1	0	0	0	0	0	5	0	0	0	0	0	0	0	0	0	0	0
OTU_2061	Bacteria	Cyanobacteria	Oxyphotobacteria	Synechococcales	Cyanobiaceae	Synechococcus CC9902	uncultured bacterium	42	1	3	0	0	1	6	4	6	0	0	0	45	8	0	0	0	1	4	0	0	1	15	0
OTU_2062	Bacteria	Marinimicrobia (SAR406 clade)	Marinimicrobia bacterium SCGC AAA003-E22	Marinimicrobia bacterium SCGC AAA003-E22	Marinimicrobia bacterium SCGC AAA003-E22	Marinimicrobia bacterium SCGC AAA003-E22	Marinimicrobia bacterium SCGC AAA003-E22	0	1	16	4	5	11	0	0	4	0	0	0	0	3	37	8	2	4	0	0	0	0	4	0
OTU_2063	Bacteria	Proteobacteria	Gammaproteobacteria	HOC36	uncultured bacterium HF0770_27E13	uncultured bacterium HF0770_27E13	uncultured bacterium HF0770_27E13	0	0	1	0	1	0	0	0	0	0	0	0	0	8	4	0	0	0	0	0	0	0	0	0
OTU_2064	Bacteria	Marinimicrobia (SAR406 clade)	Unclassified	Unclassified	Unclassified	Unclassified	Unclassified	0	1	0	0	0	0	0	0	0	0	0	0	0	2	0	0	0	0	0	0	0	0	0	0
OTU_2067	Bacteria	Marinimicrobia (SAR406 clade)	uncultured bacterium	uncultured bacterium	uncultured bacterium	uncultured bacterium	uncultured bacterium	0	1	0	0	0	0	0	0	0	0	0	0	0	4	0	0	0	0	0	0	0	0	0	0
OTU_2068	Bacteria	Proteobacteria	Alphaproteobacteria	Rhodobacterales	Rhodobacteraceae	uncultured	Rhodobacteraceae bacterium REDSEA-S03_B4	3	0	0	0	0	0	0	0	0	0	0	0	2	0	0	0	0	0	1	0	0	0	0	0
OTU_2069	Bacteria	Marinimicrobia (SAR406 clade)	Marinimicrobia bacterium JGI 0000113-D11	Marinimicrobia bacterium JGI 0000113-D11	Marinimicrobia bacterium JGI 0000113-D11	Marinimicrobia bacterium JGI 0000113-D11	Marinimicrobia bacterium JGI 0000113-D11	0	0	0	0	0	0	0	0	0	0	0	0	0	3	0	0	0	0	0	0	0	0	0	0
OTU_207	Bacteria	Proteobacteria	Gammaproteobacteria	Steroidobacterales	Woeseiaceae	Woeseia	uncultured gamma proteobacterium	0	0	0	4	2	4	0	0	5	3	9	2	0	0	2	1	2	2	0	0	2	50	36	0
OTU_2073	Bacteria	Proteobacteria	Gammaproteobacteria	UBA10353 marine group	Unclassified	Unclassified	Unclassified	0	0	0	0	0	0	0	0	0	0	0	0	0	2	1	0	0	0	0	0	0	0	0	0
OTU_2074	Bacteria	Marinimicrobia (SAR406 clade)	uncultured Candidatus Marinimicrobia bacterium	uncultured Candidatus Marinimicrobia bacterium	uncultured Candidatus Marinimicrobia bacterium	uncultured Candidatus Marinimicrobia bacterium	uncultured Candidatus Marinimicrobia bacterium	0	7	3	0	0	0	0	0	0	0	0	0	0	1	2	0	0	0	0	0	0	0	0	0
OTU_2076	Bacteria	Proteobacteria	Alphaproteobacteria	Rhizobiales	Rhizobiaceae	Unclassified	Unclassified	0	0	0	0	0	0	0	0	0	0	0	0	0	0	0	0	0	0	0	0	0	0	0	8
OTU_2077	Bacteria	Acidobacteria	Subgroup 6	uncultured bacterium KM3-173-A5	uncultured bacterium KM3-173-A5	uncultured bacterium KM3-173-A5	uncultured bacterium KM3-173-A5	0	5	0	0	0	0	0	0	0	0	0	0	0	1	0	0	0	0	0	0	0	0	0	0
OTU_2078	Bacteria	Proteobacteria	Gammaproteobacteria	Coxiellales	Coxiellaceae	Coxiella	Unclassified	0	0	2	0	0	0	0	0	0	0	0	0	0	0	0	0	0	0	0	0	0	0	0	0
OTU_2079	Bacteria	Proteobacteria	Alphaproteobacteria	Unclassified	Unclassified	Unclassified	Unclassified	0	3	0	0	0	0	0	0	0	0	0	0	0	0	0	0	0	0	0	0	0	0	0	0
OTU_208	Bacteria	Proteobacteria	Gammaproteobacteria	Salinisphaerales	Solimonadaceae	Oceanococcus	uncultured bacterium	2	5	0	0	0	0	0	28	7	1	0	0	0	0	0	0	0	0	88	0	0	0	0	0
OTU_2080	Bacteria	Marinimicrobia (SAR406 clade)	Unclassified	Unclassified	Unclassified	Unclassified	Unclassified	0	3	0	0	0	0	0	0	0	0	0	0	0	0	0	0	0	0	0	0	0	0	0	0
OTU_2081	Bacteria	Proteobacteria	Deltaproteobacteria	SAR324 clade(Marine group B)	uncultured SAR324 cluster bacterium	uncultured SAR324 cluster bacterium	uncultured SAR324 cluster bacterium	1	10	0	0	0	0	0	0	0	0	0	0	3	7	0	0	0	0	0	0	0	0	0	0
OTU_2082	Bacteria	Proteobacteria	Gammaproteobacteria	EPR3968-O8a-Bc78	uncultured marine bacterium	uncultured marine bacterium	uncultured marine bacterium	5	0	0	0	0	0	0	0	0	0	0	0	0	0	0	0	0	0	0	0	0	0	0	0
OTU_2083	Bacteria	Proteobacteria	Alphaproteobacteria	Rhizobiales	Rhizobiaceae	Unclassified	Unclassified	0	0	0	0	0	0	0	0	0	0	0	0	0	0	0	0	0	0	0	0	0	0	0	2
OTU_2084	Bacteria	Proteobacteria	Alphaproteobacteria	Rhodospirillales	AEGEAN-169 marine group	uncultured bacterium	uncultured bacterium	0	3	0	0	1	0	0	0	0	0	0	0	0	0	0	0	1	0	0	0	0	0	0	0
OTU_2085	Bacteria	Proteobacteria	Deltaproteobacteria	Oligoflexales	Oligoflexaceae	uncultured	uncultured bacterium	0	1	1	0	0	0	0	0	0	0	0	0	0	1	1	0	0	0	0	0	0	0	0	0
OTU_2087	Bacteria	Proteobacteria	Deltaproteobacteria	PB19	uncultured bacterium	uncultured bacterium	uncultured bacterium	3	0	0	0	0	0	0	0	0	0	0	0	0	0	0	0	0	0	0	0	0	0	0	0
OTU_2088	Bacteria	Proteobacteria	Alphaproteobacteria	Rhizobiales	Rhizobiaceae	Unclassified	Unclassified	0	0	0	0	0	0	0	0	0	0	0	0	0	0	0	0	0	0	0	0	0	0	0	3
OTU_209	Bacteria	Actinobacteria	Actinobacteria	Corynebacteriales	Corynebacteriaceae	Corynebacterium 1	uncultured bacterium	0	0	0	0	0	0	0	0	0	0	0	0	0	0	1	15	27	0	0	0	0	1	0	0
OTU_2094	Bacteria	AncK6	uncultured bacterium	uncultured bacterium	uncultured bacterium	uncultured bacterium	uncultured bacterium	0	4	0	0	0	0	0	0	0	0	0	0	0	7	0	0	0	0	0	2	0	0	0	0
OTU_2096	Bacteria	Marinimicrobia (SAR406 clade)	Marinimicrobia bacterium SCGC AAA003-L08	Marinimicrobia bacterium SCGC AAA003-L08	Marinimicrobia bacterium SCGC AAA003-L08	Marinimicrobia bacterium SCGC AAA003-L08	Marinimicrobia bacterium SCGC AAA003-L08	0	0	1	0	0	0	0	0	0	0	0	0	0	0	1	0	2	2	0	0	0	0	0	0
OTU_2097	Bacteria	Proteobacteria	Alphaproteobacteria	Rhodobacterales	Rhodobacteraceae	Tropicibacter	uncultured alpha proteobacterium	1	0	0	7	3	0	0	0	1	0	0	0	0	0	0	0	18	0	0	1	1	18	0	1
OTU_21	Bacteria	Proteobacteria	Deltaproteobacteria	SAR324 clade(Marine group B)	marine metagenome	marine metagenome	marine metagenome	0	273	798	20	79	144	0	10	680	7	7	11	1	388	1109	75	97	157	5	39	28	79	56	0
OTU_210	Bacteria	Proteobacteria	Alphaproteobacteria	SAR11 clade	Clade II	uncultured bacterium	uncultured bacterium	0	193	70	2	22	52	0	0	41	5	0	1	4	78	68	5	7	16	0	12	28	17	10	0
OTU_2100	Bacteria	Bacteroidetes	Bacteroidia	Flavobacteriales	NS7 marine group	uncultured bacterium	uncultured bacterium	0	0	2	0	0	0	0	0	1	0	0	0	0	2	1	0	1	0	0	0	0	0	0	0
OTU_2103	Bacteria	Planctomycetes	Unclassified	Unclassified	Unclassified	Unclassified	Unclassified	0	0	0	0	0	3	0	0	0	0	0	0	0	0	0	0	0	2	0	0	0	0	0	0
OTU_2104	Bacteria	Actinobacteria	Actinobacteria	Micrococcales	Micrococcales Incertae Sedis	Timonella	Jonesia sp. Z4	0	0	0	0	0	0	0	0	0	0	1	0	0	0	0	0	0	0	0	6	0	0	0	0
OTU_2105	Bacteria	Proteobacteria	Alphaproteobacteria	Rhodobacterales	Rhodobacteraceae	Unclassified	Unclassified	0	0	0	0	0	0	0	0	0	0	0	0	0	0	0	0	2	0	0	0	0	1	0	0
OTU_2107	Bacteria	Proteobacteria	Gammaproteobacteria	Alteromonadales	Alteromonadaceae	Alteromonas	Unclassified	0	0	0	113	5	2	0	2	57	301	167	32	0	4	0	18	9	3	1	289	329	162	22	0
OTU_2109	Bacteria	Proteobacteria	Deltaproteobacteria	Bdellovibrionales	Bacteriovoracaceae	Peredibacter	uncultured Peredibacter sp.	0	0	0	0	0	0	0	0	0	0	0	0	0	0	1	1	0	0	0	0	0	0	0	0
OTU_211	Bacteria	Proteobacteria	Alphaproteobacteria	Micavibrionales	Micavibrionaceae	uncultured	hydrothermal vent metagenome	0	0	0	36	0	0	0	0	0	0	0	0	0	0	0	0	0	0	0	0	0	0	0	0
OTU_2110	Bacteria	Proteobacteria	Alphaproteobacteria	Unclassified	Unclassified	Unclassified	Unclassified	0	0	0	0	0	0	0	0	0	0	0	0	0	0	0	0	0	0	3	0	0	0	0	0
OTU_2112	Bacteria	Bacteroidetes	Bacteroidia	Bacteroidales	Tannerellaceae	Macellibacteroides	Unclassified	0	0	0	0	0	0	0	0	0	2	0	0	0	0	2	0	0	0	3	0	0	0	0	0
OTU_2113	Bacteria	Bacteroidetes	Bacteroidia	Flavobacteriales	Flavobacteriaceae	Unclassified	Unclassified	0	0	0	0	0	0	1	0	2	0	0	0	0	0	0	0	0	0	1	0	0	0	0	0
OTU_2116	Bacteria	Marinimicrobia (SAR406 clade)	Marinimicrobia bacterium SCGC AAA003-E22	Marinimicrobia bacterium SCGC AAA003-E22	Marinimicrobia bacterium SCGC AAA003-E22	Marinimicrobia bacterium SCGC AAA003-E22	Marinimicrobia bacterium SCGC AAA003-E22	0	0	0	1	0	0	0	0	0	0	0	0	0	0	4	0	1	0	0	0	0	0	0	0
OTU_2117	Bacteria	Proteobacteria	Gammaproteobacteria	Pasteurellales	Pasteurellaceae	Haemophilus	uncultured organism	0	0	0	0	0	0	0	0	0	0	0	0	0	0	0	0	0	0	10	0	2	0	0	0
OTU_2119	Bacteria	Chloroflexi	Dehalococcoidia	SAR202 clade	Unclassified	Unclassified	Unclassified	0	0	0	0	0	1	0	0	0	0	0	0	0	0	0	1	0	0	0	0	0	0	0	0
OTU_212	Bacteria	Proteobacteria	Gammaproteobacteria	HOC36	marine metagenome	marine metagenome	marine metagenome	3	251	9	0	0	0	0	1	0	0	0	0	1	107	2	0	0	0	0	3	0	0	0	0
OTU_2120	Bacteria	Chloroflexi	TK10	marine metagenome	marine metagenome	marine metagenome	marine metagenome	0	0	0	1	0	0	0	0	0	0	0	0	0	0	0	0	2	0	0	0	0	0	0	0
OTU_2121	Bacteria	Patescibacteria	Gracilibacteria	Candidatus Peregrinibacteria	uncultured bacterium	uncultured bacterium	uncultured bacterium	0	0	0	0	0	0	0	0	0	0	0	0	0	0	0	0	2	0	0	0	0	0	0	0
OTU_2123	Bacteria	Bacteroidetes	Bacteroidia	Sphingobacteriales	NS11-12 marine group	uncultured bacterium	uncultured bacterium	0	0	0	0	1	0	0	0	0	0	0	0	0	0	0	0	3	0	0	0	0	0	0	0
OTU_2124	Bacteria	Firmicutes	Bacilli	Bacillales	Family XII	Exiguobacterium	uncultured Exiguobacterium sp.	0	0	0	0	0	0	0	0	0	0	1	0	0	0	0	0	3	0	0	0	0	8	0	0
OTU_2125	Bacteria	Proteobacteria	Gammaproteobacteria	Cellvibrionales	Spongiibacteraceae	Sinobacterium	uncultured bacterium	0	0	0	0	0	1	0	4	0	0	0	0	0	0	0	0	2	0	0	0	0	0	0	0
OTU_2126	Bacteria	Proteobacteria	Gammaproteobacteria	Pseudomonadales	Pseudomonadaceae	Azotobacter	uncultured bacterium	1	0	1	0	2	0	0	1	5	53	1	1	0	0	1	1	11	2	18	6	58	6	1	0
OTU_2127	Bacteria	Proteobacteria	Gammaproteobacteria	Pseudomonadales	Moraxellaceae	Acinetobacter	Unclassified	0	0	0	0	5	0	0	0	0	1	0	0	0	0	0	0	0	0	0	0	0	0	0	0
OTU_2129	Bacteria	Bacteroidetes	Bacteroidia	Flavobacteriales	NS7 marine group	uncultured bacterium	uncultured bacterium	0	0	0	0	0	0	0	0	0	0	0	0	0	3	0	0	0	0	0	0	0	0	0	0
OTU_213	Bacteria	Planctomycetes	Phycisphaerae	Phycisphaerales	Phycisphaeraceae	FS140-16B-02 marine group	uncultured bacterium	0	10	4	0	0	1	0	7	10	0	0	0	0	3	4	6	0	0	1	8	1	6	2	0
OTU_2130	Bacteria	Planctomycetes	OM190	uncultured bacterium	uncultured bacterium	uncultured bacterium	uncultured bacterium	0	0	0	0	0	1	0	1	0	0	0	0	0	2	0	0	0	0	0	0	1	0	1	0
OTU_2131	Bacteria	Proteobacteria	Gammaproteobacteria	UBA10353 marine group	uncultured gamma proteobacterium HF0200_24F15	uncultured gamma proteobacterium HF0200_24F15	uncultured gamma proteobacterium HF0200_24F15	0	3	0	0	0	0	0	0	0	0	0	0	0	2	0	0	0	0	0	0	0	0	0	0
OTU_2132	Bacteria	Marinimicrobia (SAR406 clade)	uncultured bacterium	uncultured bacterium	uncultured bacterium	uncultured bacterium	uncultured bacterium	0	3	0	0	0	0	0	0	0	0	0	0	0	6	2	0	0	0	0	0	0	0	0	0
OTU_2134	Bacteria	Proteobacteria	Deltaproteobacteria	Oligoflexales	Oligoflexaceae	uncultured	marine metagenome	0	0	0	0	0	0	0	0	0	0	0	0	3	0	0	0	0	0	0	0	0	0	0	0
OTU_2135	Bacteria	Planctomycetes	Phycisphaerae	Phycisphaerales	Phycisphaeraceae	uncultured	Unclassified	0	0	0	0	0	0	0	0	0	0	0	2	0	0	0	0	0	0	0	0	0	0	0	0
OTU_2136	Bacteria	Proteobacteria	Alphaproteobacteria	Rhodobacterales	Rhodobacteraceae	Albimonas	Albimonas pacifica	0	0	0	0	0	4	0	0	0	0	1	7	0	0	0	3	0	3	0	0	15	1	0	0
OTU_2137	Bacteria	Verrucomicrobia	Verrucomicrobiae	Opitutales	Puniceicoccaceae	Pelagicoccus	uncultured bacterium	0	0	0	0	0	3	0	0	0	0	0	1	0	0	0	0	0	0	0	0	0	0	0	0
OTU_2138	Bacteria	Patescibacteria	ABY1	Candidatus Kuenenbacteria	uncultured deep-sea bacterium	uncultured deep-sea bacterium	uncultured deep-sea bacterium	0	0	0	0	0	0	0	0	0	0	0	0	0	0	0	0	0	0	0	0	5	0	0	0
OTU_2139	Bacteria	Bacteroidetes	Bacteroidia	Flavobacteriales	Flavobacteriaceae	Muricauda	Unclassified	2	1	0	0	8	1	0	2	0	0	3	0	0	0	8	14	43	6	0	6	21	5	1	12
OTU_214	Bacteria	Proteobacteria	Alphaproteobacteria	Rhodobacterales	Rhodobacteraceae	Rhodovulum	Rhodovulum sp. KU27F3	0	16	0	0	0	1	3	12	0	0	0	0	0	0	0	0	0	0	0	0	0	3	0	0
OTU_2141	Bacteria	Proteobacteria	Deltaproteobacteria	Myxococcales	P3OB-42	uncultured bacterium	uncultured bacterium	0	1	0	0	3	0	0	3	0	0	0	0	0	1	1	0	0	0	0	0	3	1	2	0
OTU_2143	Bacteria	Unclassified	Unclassified	Unclassified	Unclassified	Unclassified	Unclassified	0	0	0	0	0	0	0	0	2	0	0	0	0	0	0	0	0	0	0	0	3	0	0	0
OTU_2144	Bacteria	Proteobacteria	Gammaproteobacteria	Unclassified	Unclassified	Unclassified	Unclassified	0	0	0	0	0	0	0	0	0	0	0	0	0	0	0	0	0	0	0	0	5	0	0	0
OTU_2145	Bacteria	Gemmatimonadetes	BD2-11 terrestrial group	uncultured marine microorganism	uncultured marine microorganism	uncultured marine microorganism	uncultured marine microorganism	0	0	0	0	0	0	0	0	0	0	0	0	0	0	0	0	0	0	0	0	0	7	0	0
OTU_2147	Bacteria	Planctomycetes	OM190	uncultured bacterium	uncultured bacterium	uncultured bacterium	uncultured bacterium	0	0	2	0	0	0	0	0	18	5	0	0	0	0	0	0	0	0	0	2	11	0	0	0
OTU_2148	Bacteria	Hydrogenedentes	Hydrogenedentia	Hydrogenedentiales	Hydrogenedensaceae	uncultured deep-sea bacterium	uncultured deep-sea bacterium	0	0	0	0	0	0	0	0	0	0	0	0	0	0	0	0	0	0	0	0	0	0	3	0
OTU_2149	Bacteria	Proteobacteria	Alphaproteobacteria	Rhizobiales	Beijerinckiaceae	Methylobacterium	Unclassified	0	0	0	0	0	0	0	0	1	0	0	0	0	0	0	0	0	0	0	0	0	3	1	0
OTU_215	Bacteria	Proteobacteria	Alphaproteobacteria	Unclassified	Unclassified	Unclassified	Unclassified	1	0	0	0	0	0	1	0	0	0	0	0	2	0	0	0	0	0	44	1	0	0	0	0
OTU_2150	Bacteria	Planctomycetes	OM190	uncultured bacterium	uncultured bacterium	uncultured bacterium	uncultured bacterium	0	0	0	0	0	0	0	0	0	0	0	0	0	0	0	0	0	0	2	0	0	0	1	0
OTU_2151	Bacteria	Marinimicrobia (SAR406 clade)	marine metagenome	marine metagenome	marine metagenome	marine metagenome	marine metagenome	1	0	0	0	0	0	0	0	0	0	0	0	0	0	0	0	0	0	0	0	0	0	4	0
OTU_2152	Bacteria	Proteobacteria	Alphaproteobacteria	Rickettsiales	Unclassified	Unclassified	Unclassified	1	0	0	0	0	0	0	0	0	0	0	0	0	0	0	0	0	0	0	0	0	0	1	0
OTU_2153	Bacteria	Proteobacteria	Alphaproteobacteria	SAR11 clade	Clade II	marine metagenome	marine metagenome	0	0	0	0	0	2	0	0	0	0	0	0	0	0	0	0	0	1	0	0	0	0	1	0
OTU_2156	Bacteria	Proteobacteria	Deltaproteobacteria	Unclassified	Unclassified	Unclassified	Unclassified	0	0	0	0	0	0	0	0	0	0	0	0	0	0	0	0	0	0	0	6	0	0	7	0
OTU_2158	Bacteria	Bacteroidetes	Bacteroidia	Bacteroidales	Prevotellaceae	Prevotella	Chlamydia trachomatis	0	0	0	0	0	0	0	0	0	0	0	0	0	0	0	0	0	0	0	0	0	0	3	0
OTU_2159	Bacteria	Proteobacteria	Alphaproteobacteria	SAR11 clade	Clade I	uncultured	uncultured bacterium	0	39	10	0	2	7	0	0	14	0	0	0	0	23	20	2	1	3	0	2	2	1	2	0
OTU_216	Bacteria	Proteobacteria	Gammaproteobacteria	Alteromonadales	Alteromonadaceae	Salinimonas	Salinimonas lutimaris	0	0	0	0	30	1	0	0	3	0	77	0	0	0	0	0	0	0	0	0	0	0	0	0
OTU_2161	Bacteria	Planctomycetes	OM190	hydrothermal vent metagenome	hydrothermal vent metagenome	hydrothermal vent metagenome	hydrothermal vent metagenome	0	0	0	0	0	0	0	0	0	0	0	0	0	0	0	0	0	2	0	0	0	0	3	0
OTU_2162	Bacteria	Firmicutes	Clostridia	Clostridiales	Clostridiaceae 1	Clostridium sensu stricto 1	Clostridium sp. enrichment culture clone G-5a	0	0	0	0	0	0	0	0	0	1	0	0	0	0	0	0	0	0	0	0	0	1	0	0
OTU_2164	Bacteria	Proteobacteria	Gammaproteobacteria	Betaproteobacteriales	Rhodocyclaceae	Azoarcus	Azoarcus sp. MP1	0	0	0	0	0	0	0	0	0	0	0	0	0	0	0	0	0	0	0	0	3	3	0	0
OTU_2165	Bacteria	Proteobacteria	Alphaproteobacteria	Sphingomonadales	Sphingomonadaceae	Erythrobacter	Unclassified	0	0	0	0	0	2	0	0	0	1	0	0	0	0	0	0	0	1	0	0	0	0	0	3
OTU_2166	Bacteria	Proteobacteria	Deltaproteobacteria	Bdellovibrionales	Bdellovibrionaceae	OM27 clade	uncultured proteobacterium	0	1	0	0	0	0	0	0	0	0	0	0	0	0	0	0	0	0	0	0	3	5	1	0
OTU_2167	Bacteria	Bacteroidetes	Bacteroidia	Flavobacteriales	Flavobacteriaceae	NS5 marine group	Rhodobacteraceae bacterium REDSEA-S34_B6	1	0	0	1	0	1	12	0	0	0	0	0	15	0	0	0	0	0	0	0	0	0	9	0
OTU_2168	Bacteria	Marinimicrobia (SAR406 clade)	uncultured marine microorganism	uncultured marine microorganism	uncultured marine microorganism	uncultured marine microorganism	uncultured marine microorganism	0	4	3	0	0	0	0	0	0	0	0	0	0	3	1	0	1	0	0	1	0	0	7	0
OTU_2169	Bacteria	Proteobacteria	Gammaproteobacteria	KI89A clade	Unclassified	Unclassified	Unclassified	0	0	0	0	1	1	0	0	0	0	0	0	0	0	0	0	0	1	0	0	0	2	0	0
OTU_217	Bacteria	Bacteroidetes	Bacteroidia	Flavobacteriales	Flavobacteriaceae	NS5 marine group	uncultured bacterium HF0010_31F02	85	0	1	0	2	2	10	0	0	0	0	0	5	0	0	3	0	3	10	0	0	0	0	0
OTU_2170	Bacteria	Calditrichaeota	Calditrichia	Calditrichales	Calditrichaceae	SM23-31	bacterium SM23_31	0	0	0	1	0	0	0	0	2	0	0	0	0	0	0	0	0	0	0	0	0	2	0	0
OTU_2171	Bacteria	Marinimicrobia (SAR406 clade)	Marinimicrobia bacterium SCGC AAA003-E22	Marinimicrobia bacterium SCGC AAA003-E22	Marinimicrobia bacterium SCGC AAA003-E22	Marinimicrobia bacterium SCGC AAA003-E22	Marinimicrobia bacterium SCGC AAA003-E22	0	0	0	0	0	0	0	0	0	0	0	0	5	0	0	0	0	0	0	0	0	0	6	0
OTU_2172	Bacteria	Proteobacteria	Deltaproteobacteria	NB1-j	uncultured delta proteobacterium	uncultured delta proteobacterium	uncultured delta proteobacterium	0	0	0	0	0	0	0	0	0	0	1	0	0	0	0	0	0	1	0	0	0	2	0	0
OTU_2173	Bacteria	Planctomycetes	OM190	uncultured planctomycete	uncultured planctomycete	uncultured planctomycete	uncultured planctomycete	0	0	0	0	0	6	0	0	5	0	11	38	0	0	0	0	1	2	0	0	4	34	83	0
OTU_2174	Bacteria	Acidobacteria	Subgroup 26	uncultured Acidobacterium sp.	uncultured Acidobacterium sp.	uncultured Acidobacterium sp.	uncultured Acidobacterium sp.	0	0	0	0	0	3	0	0	0	0	0	0	0	0	0	0	0	2	0	0	0	5	0	0
OTU_2175	Bacteria	Proteobacteria	Deltaproteobacteria	NB1-j	uncultured prokaryote	uncultured prokaryote	uncultured prokaryote	0	0	0	0	0	0	0	0	0	0	0	0	0	0	0	0	0	0	0	0	1	2	2	0
OTU_2176	Bacteria	Proteobacteria	Gammaproteobacteria	Cellvibrionales	Halieaceae	Halioglobus	uncultured bacterium	0	0	0	0	0	0	0	3	0	0	0	0	0	0	0	0	0	0	1	0	0	0	1	0
OTU_2177	Bacteria	Proteobacteria	Alphaproteobacteria	Rhizobiales	Beijerinckiaceae	Methylobacterium	Unclassified	1	0	0	1	3	0	0	3	8	3	2	7	0	0	1	0	1	0	8	1	11	3	6	0
OTU_2178	Bacteria	Actinobacteria	Actinobacteria	Micrococcales	Microbacteriaceae	Pseudoclavibacter	Pseudoclavibacter helvolus	0	0	0	0	0	0	0	0	0	0	0	0	0	0	0	0	0	0	0	0	0	0	4	0
OTU_2179	Bacteria	Marinimicrobia (SAR406 clade)	uncultured marine microorganism	uncultured marine microorganism	uncultured marine microorganism	uncultured marine microorganism	uncultured marine microorganism	0	4	2	0	0	1	0	0	0	0	0	0	0	3	0	2	0	0	0	0	0	2	1	0
OTU_218	Bacteria	Proteobacteria	Alphaproteobacteria	Sphingomonadales	Sphingomonadaceae	uncultured	Pacificimonas flava	0	1	0	0	0	0	5	3	1	0	0	0	8	0	0	0	0	0	18	1	0	0	0	0
OTU_2181	Bacteria	Proteobacteria	Deltaproteobacteria	Bradymonadales	uncultured marine bacterium	uncultured marine bacterium	uncultured marine bacterium	0	0	0	0	0	1	0	0	0	0	0	0	0	0	0	0	0	0	0	0	0	0	2	0
OTU_2182	Bacteria	Proteobacteria	Gammaproteobacteria	Alteromonadales	Marinobacteraceae	Marinobacter	Unclassified	0	2	0	1	0	0	0	0	0	0	0	0	0	0	0	0	0	0	0	1	2	0	0	4
OTU_2183	Bacteria	Verrucomicrobia	Verrucomicrobiae	Verrucomicrobiales	Rubritaleaceae	Roseibacillus	uncultured bacterium	0	2	1	0	0	0	0	0	0	0	0	0	0	0	0	0	0	0	0	1	0	1	1	0
OTU_2184	Bacteria	Marinimicrobia (SAR406 clade)	uncultured bacterium	uncultured bacterium	uncultured bacterium	uncultured bacterium	uncultured bacterium	0	1	0	0	0	0	0	0	0	0	0	0	0	0	0	0	0	0	0	0	0	0	3	0
OTU_2185	Bacteria	Proteobacteria	Alphaproteobacteria	Rhizobiales	Rhizobiaceae	Unclassified	Unclassified	0	0	0	0	0	0	0	0	0	0	0	0	0	0	0	0	0	0	0	0	0	0	0	2
OTU_2188	Bacteria	Marinimicrobia (SAR406 clade)	uncultured bacterium	uncultured bacterium	uncultured bacterium	uncultured bacterium	uncultured bacterium	0	3	0	0	0	0	0	0	0	0	0	0	0	1	0	0	0	0	0	0	0	0	1	0
OTU_2189	Bacteria	Proteobacteria	Gammaproteobacteria	BD7-8	uncultured bacterium	uncultured bacterium	uncultured bacterium	0	0	0	0	0	0	0	0	0	0	0	1	0	0	0	0	0	0	0	0	0	0	1	0
OTU_219	Bacteria	Marinimicrobia (SAR406 clade)	marine metagenome	marine metagenome	marine metagenome	marine metagenome	marine metagenome	0	441	22	20	33	72	0	0	0	0	0	0	0	182	40	32	36	49	0	5	0	0	2	0
OTU_2192	Bacteria	Planctomycetes	BD7-11	uncultured Planctomycetales bacterium	uncultured Planctomycetales bacterium	uncultured Planctomycetales bacterium	uncultured Planctomycetales bacterium	0	2	0	0	0	0	0	0	0	0	0	0	0	0	0	0	0	0	0	2	0	0	0	0
OTU_2195	Bacteria	Bacteroidetes	Bacteroidia	Flavobacteriales	NS9 marine group	hydrothermal vent metagenome	hydrothermal vent metagenome	0	10	8	0	0	1	0	1	0	0	0	0	0	3	0	4	0	1	0	0	1	0	0	0
OTU_2196	Bacteria	Marinimicrobia (SAR406 clade)	Marinimicrobia bacterium SCGC AAA003-E22	Marinimicrobia bacterium SCGC AAA003-E22	Marinimicrobia bacterium SCGC AAA003-E22	Marinimicrobia bacterium SCGC AAA003-E22	Marinimicrobia bacterium SCGC AAA003-E22	0	2	1	0	0	0	0	0	0	0	0	0	0	3	1	1	0	0	0	0	0	0	0	0
OTU_2197	Bacteria	Proteobacteria	Deltaproteobacteria	PB19	Unclassified	Unclassified	Unclassified	0	2	0	0	0	0	0	0	0	0	0	0	0	0	0	2	0	0	0	0	0	0	0	0
OTU_2198	Bacteria	Proteobacteria	Alphaproteobacteria	SAR11 clade	Clade I	Clade Ia	Unclassified	0	3	0	0	0	0	0	0	0	0	0	0	0	0	0	0	0	0	0	0	0	0	0	0
OTU_22	Bacteria	Proteobacteria	Alphaproteobacteria	Sphingomonadales	Sphingomonadaceae	Unclassified	Unclassified	0	1	3	17	47	18	12	1	19	7	9	18	0	8	2	26	54	176	0	46	7	26	37	0
OTU_2200	Bacteria	Marinimicrobia (SAR406 clade)	uncultured bacterium	uncultured bacterium	uncultured bacterium	uncultured bacterium	uncultured bacterium	0	2	0	0	0	0	0	0	0	0	0	0	0	0	0	0	0	0	0	0	0	0	0	0
OTU_2201	Bacteria	Nitrospinae	Nitrospinia	Nitrospinales	Nitrospinaceae	Nitrospina	uncultured delta proteobacterium	0	4	0	0	0	0	0	0	0	0	0	0	0	2	0	0	0	0	0	0	0	0	0	0
OTU_2202	Bacteria	Proteobacteria	Deltaproteobacteria	Oligoflexales	053A03-B-DI-P58	uncultured delta proteobacterium	uncultured delta proteobacterium	0	0	2	0	0	0	0	0	0	0	0	0	0	0	0	0	0	1	0	0	2	0	0	0
OTU_2203	Bacteria	Chloroflexi	Dehalococcoidia	SAR202 clade	Unclassified	Unclassified	Unclassified	0	1	2	0	0	0	0	0	0	0	0	0	0	0	0	0	0	0	0	0	0	0	0	0
OTU_2204	Bacteria	Proteobacteria	Deltaproteobacteria	SAR324 clade(Marine group B)	uncultured SAR324 cluster bacterium	uncultured SAR324 cluster bacterium	uncultured SAR324 cluster bacterium	0	116	1	0	0	0	0	0	0	0	0	0	1	131	0	0	0	0	0	1	0	0	1	0
OTU_2206	Bacteria	Marinimicrobia (SAR406 clade)	uncultured bacterium	uncultured bacterium	uncultured bacterium	uncultured bacterium	uncultured bacterium	0	2	0	0	0	0	0	0	0	0	0	0	0	0	0	0	0	0	0	0	0	0	0	0
OTU_2208	Bacteria	Chloroflexi	Dehalococcoidia	SAR202 clade	uncultured Chloroflexus sp.	uncultured Chloroflexus sp.	uncultured Chloroflexus sp.	0	1	1	0	0	0	0	0	0	0	0	0	0	2	1	0	0	0	0	0	0	0	0	0
OTU_2209	Bacteria	Proteobacteria	Alphaproteobacteria	SAR11 clade	Clade II	uncultured organism	uncultured organism	0	1	0	0	0	0	0	0	1	0	0	0	0	2	0	0	0	0	0	0	0	0	0	0
OTU_221	Bacteria	Proteobacteria	Deltaproteobacteria	SAR324 clade(Marine group B)	uncultured SAR324 cluster bacterium	uncultured SAR324 cluster bacterium	uncultured SAR324 cluster bacterium	16	996	8	0	2	2	1	1	2	0	0	0	10	1054	15	1	0	0	3	20	0	0	18	0
OTU_2211	Bacteria	Proteobacteria	Alphaproteobacteria	SAR11 clade	Clade II	marine metagenome	marine metagenome	0	0	1	0	0	0	0	0	1	0	0	0	0	1	1	1	1	0	0	0	0	0	0	0
OTU_2212	Bacteria	Actinobacteria	Acidimicrobiia	Microtrichales	Microtrichaceae	Sva0996 marine group	marine metagenome	0	0	0	0	0	0	0	0	0	0	0	0	0	0	0	0	0	0	2	0	0	0	0	0
OTU_2213	Bacteria	Firmicutes	Bacilli	Bacillales	Planococcaceae	Chryseomicrobium	Bacillus sp. ChroAq 29	1	0	0	0	1	0	0	0	0	0	0	0	0	0	0	0	0	0	2	0	1	0	0	0
OTU_2215	Bacteria	Proteobacteria	Deltaproteobacteria	Unclassified	Unclassified	Unclassified	Unclassified	0	0	0	0	0	0	0	0	0	0	0	0	0	0	0	0	0	0	0	5	0	0	0	0
OTU_2216	Bacteria	Firmicutes	Bacilli	Lactobacillales	Carnobacteriaceae	Carnobacterium	Carnobacterium maltaromaticum	0	0	0	0	0	0	0	0	0	0	0	0	0	0	0	0	0	0	2	0	0	0	0	0
OTU_2217	Bacteria	Proteobacteria	Deltaproteobacteria	Myxococcales	Haliangiaceae	Haliangium	uncultured bacterium	0	0	0	0	0	0	0	0	2	0	0	0	0	0	0	1	0	0	5	0	0	0	0	0
OTU_2218	Bacteria	Firmicutes	Bacilli	Bacillales	Bacillaceae	Bacillus	Unclassified	0	0	0	0	0	0	0	0	0	0	0	0	0	0	0	0	0	0	8	3	0	0	0	0
OTU_2219	Bacteria	Bacteroidetes	Bacteroidia	Flavobacteriales	Flavobacteriaceae	NS4 marine group	uncultured bacterium	5	0	2	0	1	0	6	0	0	0	0	0	4	3	0	4	0	0	3	0	0	0	1	0
OTU_222	Bacteria	Proteobacteria	Alphaproteobacteria	Micavibrionales	Micavibrionaceae	uncultured	Unclassified	0	0	5	0	0	0	0	0	2	0	0	0	0	0	0	1	0	31	0	0	0	0	0	0
OTU_2223	Bacteria	Planctomycetes	Pla3 lineage	Unclassified	Unclassified	Unclassified	Unclassified	0	0	0	0	0	0	0	1	1	1	0	0	0	0	0	0	0	0	0	7	0	0	0	0
OTU_2224	Bacteria	Proteobacteria	Deltaproteobacteria	PB19	Unclassified	Unclassified	Unclassified	0	0	0	0	0	0	0	0	0	0	0	0	0	0	0	0	0	0	0	5	0	0	0	0
OTU_2226	Bacteria	Proteobacteria	Gammaproteobacteria	Vibrionales	Vibrionaceae	Vibrio	uncultured marine microorganism	0	0	0	0	0	0	0	0	0	0	0	0	0	0	0	0	0	0	0	2	0	0	1	0
OTU_2227	Bacteria	Proteobacteria	Gammaproteobacteria	Salinisphaerales	Salinisphaeraceae	Salinisphaera	uncultured bacterium	1	0	0	0	0	0	0	0	0	0	0	0	0	0	0	0	0	0	0	1	0	0	0	0
OTU_2228	Bacteria	Proteobacteria	Deltaproteobacteria	PB19	Unclassified	Unclassified	Unclassified	0	0	0	0	0	0	0	0	0	0	0	0	0	0	0	0	0	0	0	2	0	0	0	0
OTU_2229	Bacteria	Actinobacteria	Actinobacteria	Corynebacteriales	Corynebacteriaceae	Corynebacterium 1	uncultured bacterium	2	6	0	0	3	1	15	96	41	27	2	4	0	0	0	5	0	0	0	4	34	3	0	0
OTU_223	Bacteria	Bacteroidetes	Bacteroidia	Chitinophagales	Saprospiraceae	Lewinella	Lewinella nigricans	2	1	0	0	1	0	0	0	55	0	0	0	0	0	0	0	0	0	0	15	3	0	0	0
OTU_2230	Bacteria	Proteobacteria	Deltaproteobacteria	Oligoflexales	Oligoflexaceae	uncultured	uncultured marine bacterium	0	0	1	0	0	0	0	0	0	0	0	0	0	0	0	0	0	0	0	0	3	0	0	0
OTU_2231	Bacteria	Actinobacteria	Actinobacteria	Frankiales	Geodermatophilaceae	Blastococcus	uncultured Blastococcus sp.	0	0	0	0	0	0	0	0	3	0	0	0	0	0	0	0	0	0	0	0	9	5	2	0
OTU_2232	Bacteria	Proteobacteria	Gammaproteobacteria	Thiomicrospirales	Thioglobaceae	SUP05 cluster	uncultured organism	0	0	0	0	0	0	0	0	0	0	0	0	0	1	1	0	0	0	0	0	0	0	0	0
OTU_2233	Bacteria	Actinobacteria	Actinobacteria	Micrococcales	Brevibacteriaceae	Brevibacterium	uncultured actinobacterium	0	0	0	0	0	0	0	0	0	0	0	0	0	0	0	0	0	0	0	0	2	0	0	0
OTU_2234	Bacteria	Proteobacteria	Deltaproteobacteria	NB1-j	uncultured bacterium	uncultured bacterium	uncultured bacterium	0	0	0	0	0	0	0	0	3	0	0	0	0	0	0	0	0	0	0	0	2	0	7	0
OTU_2236	Bacteria	Proteobacteria	Alphaproteobacteria	Rickettsiales	S25-593	uncultured bacterium	uncultured bacterium	1	4	2	0	0	0	0	0	0	0	0	0	0	2	3	1	0	0	0	0	4	0	0	0
OTU_2237	Bacteria	Proteobacteria	Gammaproteobacteria	Cellvibrionales	Spongiibacteraceae	Dasania	uncultured bacterium	0	0	0	0	0	0	0	0	1	0	0	1	0	0	0	0	0	0	0	0	1	0	1	0
OTU_2239	Bacteria	Proteobacteria	Gammaproteobacteria	Oceanospirillales	Alcanivoracaceae	Alcanivorax	uncultured Alcanivorax sp.	11	2	3	0	1	92	0	1	15	4	8	53	0	3	0	0	0	4	3	45	9	0	0	91
OTU_224	Bacteria	Planctomycetes	Planctomycetacia	Pirellulales	Pirellulaceae	Rhodopirellula	uncultured bacterium	0	7	5	0	7	27	0	0	6	0	1	0	0	10	11	0	3	4	0	2	3	7	4	0
OTU_2241	Bacteria	Proteobacteria	Deltaproteobacteria	Myxococcales	Haliangiaceae	Haliangium	uncultured prokaryote	0	0	0	0	0	0	0	0	0	0	0	0	0	0	0	0	0	0	0	0	3	0	0	0
OTU_2242	Bacteria	Margulisbacteria	Unclassified	Unclassified	Unclassified	Unclassified	Unclassified	0	0	0	0	0	0	0	0	0	0	0	0	0	0	0	0	0	0	0	0	2	0	0	0
OTU_2243	Bacteria	Proteobacteria	Deltaproteobacteria	PB19	uncultured bacterium GR-WP33-58	uncultured bacterium GR-WP33-58	uncultured bacterium GR-WP33-58	0	0	0	0	0	0	0	0	0	0	0	0	0	0	0	0	0	0	0	0	4	0	0	0
OTU_2244	Bacteria	Acidobacteria	Subgroup 21	uncultured deep-sea bacterium	uncultured deep-sea bacterium	uncultured deep-sea bacterium	uncultured deep-sea bacterium	0	1	0	1	2	2	0	0	0	0	0	0	0	0	4	0	2	1	0	0	0	0	0	0
OTU_2246	Bacteria	Marinimicrobia (SAR406 clade)	uncultured marine microorganism	uncultured marine microorganism	uncultured marine microorganism	uncultured marine microorganism	uncultured marine microorganism	0	5	2	1	0	0	0	0	0	0	0	0	0	2	6	3	0	0	0	0	0	0	0	0
OTU_2247	Bacteria	PAUC34f	Unclassified	Unclassified	Unclassified	Unclassified	Unclassified	0	0	3	0	1	1	0	0	0	0	0	0	0	0	6	0	0	1	0	0	0	0	0	0
OTU_2248	Bacteria	Proteobacteria	Gammaproteobacteria	Piscirickettsiales	Piscirickettsiaceae	Candidatus Endoecteinascidia	Unclassified	0	0	0	0	0	0	0	0	0	0	0	0	0	1	1	0	0	0	0	0	0	0	0	0
OTU_225	Bacteria	Planctomycetes	OM190	uncultured bacterium	uncultured bacterium	uncultured bacterium	uncultured bacterium	0	2	4	0	0	1	0	5	44	2	6	8	0	1	1	0	1	0	0	30	75	12	25	0
OTU_2250	Bacteria	Unclassified	Unclassified	Unclassified	Unclassified	Unclassified	Unclassified	0	0	0	0	0	0	0	0	0	0	0	0	0	1	1	0	0	0	0	0	0	0	0	0
OTU_2251	Bacteria	Chloroflexi	Dehalococcoidia	SAR202 clade	Unclassified	Unclassified	Unclassified	0	0	2	0	0	1	0	0	0	0	0	0	0	0	2	0	0	0	0	0	0	0	0	0
OTU_2252	Bacteria	Proteobacteria	Deltaproteobacteria	SAR324 clade(Marine group B)	marine metagenome	marine metagenome	marine metagenome	0	0	4	0	0	1	0	0	4	0	0	0	0	0	9	0	0	0	0	0	0	0	1	0
OTU_2255	Bacteria	Proteobacteria	Gammaproteobacteria	SAR86 clade	Rhodobacteraceae bacterium REDSEA-S29_B10	Rhodobacteraceae bacterium REDSEA-S29_B10	Rhodobacteraceae bacterium REDSEA-S29_B10	4	0	2	0	0	0	0	0	0	0	0	0	0	1	0	0	0	0	0	0	0	0	0	0
OTU_2256	Bacteria	Marinimicrobia (SAR406 clade)	Marinimicrobia bacterium SCGC AAA003-L08	Marinimicrobia bacterium SCGC AAA003-L08	Marinimicrobia bacterium SCGC AAA003-L08	Marinimicrobia bacterium SCGC AAA003-L08	Marinimicrobia bacterium SCGC AAA003-L08	0	1	1	0	0	0	0	0	0	0	0	0	0	0	0	0	1	0	0	0	0	0	0	0
OTU_2257	Bacteria	Marinimicrobia (SAR406 clade)	uncultured bacterium	uncultured bacterium	uncultured bacterium	uncultured bacterium	uncultured bacterium	0	0	3	0	0	0	0	0	0	0	0	0	0	0	0	0	0	0	0	0	0	0	0	0
OTU_2258	Bacteria	Proteobacteria	Gammaproteobacteria	Coxiellales	Coxiellaceae	Coxiella	uncultured organism	0	0	2	0	0	0	0	0	0	0	0	0	0	0	1	0	6	2	0	0	0	0	0	0
OTU_2259	Bacteria	Chloroflexi	Dehalococcoidia	SAR202 clade	uncultured gamma proteobacterium	uncultured gamma proteobacterium	uncultured gamma proteobacterium	0	0	2	0	0	0	0	0	0	0	0	0	0	0	0	0	0	0	0	0	0	0	0	0
OTU_226	Bacteria	Proteobacteria	Gammaproteobacteria	Betaproteobacteriales	Neisseriaceae	Neisseria	uncultured Neisseria sp.	0	0	0	0	0	0	0	0	0	0	0	0	0	0	0	0	0	0	78	0	0	0	0	0
OTU_2260	Bacteria	Proteobacteria	Deltaproteobacteria	Myxococcales	Eel-36e1D6	uncultured delta proteobacterium	uncultured delta proteobacterium	0	0	3	0	0	0	0	0	1	0	0	0	0	0	0	0	0	2	0	0	0	0	0	0
OTU_2261	Bacteria	PAUC34f	uncultured bacterium	uncultured bacterium	uncultured bacterium	uncultured bacterium	uncultured bacterium	0	0	2	0	1	0	0	0	0	0	0	0	0	0	2	0	0	0	0	0	0	0	0	0
OTU_2262	Bacteria	Actinobacteria	Acidimicrobiia	Microtrichales	Microtrichaceae	Sva0996 marine group	uncultured bacterium AD12-A11	0	60	215	7	1	9	0	0	26	0	0	1	0	26	162	7	3	0	0	7	12	0	0	0
OTU_2264	Bacteria	Planctomycetes	BD7-11	uncultured bacterium	uncultured bacterium	uncultured bacterium	uncultured bacterium	0	0	1	0	0	0	0	0	0	0	0	0	0	0	1	0	0	0	0	0	0	0	0	0
OTU_2265	Bacteria	Proteobacteria	Alphaproteobacteria	Rhodospirillales	Magnetospiraceae	uncultured	uncultured bacterium	0	0	4	0	0	11	0	0	0	0	0	0	0	0	1	1	5	1	0	0	0	0	0	0
OTU_2266	Bacteria	Marinimicrobia (SAR406 clade)	uncultured bacterium	uncultured bacterium	uncultured bacterium	uncultured bacterium	uncultured bacterium	0	3	0	0	0	2	0	0	0	0	0	0	0	1	1	0	2	1	0	0	0	0	0	0
OTU_2267	Bacteria	Proteobacteria	Alphaproteobacteria	Sphingomonadales	Sphingomonadaceae	Sphingomonas	Sphingomonas sp.	0	0	0	0	0	0	0	0	1	0	0	0	0	0	0	0	8	0	0	1	0	0	0	0
OTU_227	Bacteria	Proteobacteria	Alphaproteobacteria	Rhodobacterales	Rhodobacteraceae	Albirhodobacter	uncultured Rhodobacter sp.	0	0	0	0	0	0	0	0	0	0	0	0	0	0	0	0	0	0	35	0	0	0	0	0
OTU_2271	Bacteria	Proteobacteria	Alphaproteobacteria	Rhizobiales	Beijerinckiaceae	Methylobacterium	Unclassified	0	0	0	0	1	0	0	1	1	0	0	0	0	0	0	0	2	1	2	1	3	0	4	0
OTU_2273	Bacteria	Proteobacteria	Deltaproteobacteria	Oligoflexales	Oligoflexaceae	uncultured	Unclassified	0	0	0	0	2	0	0	0	0	0	0	2	0	0	0	0	1	0	0	0	0	0	0	0
OTU_2274	Bacteria	Marinimicrobia (SAR406 clade)	Marinimicrobia bacterium SCGC AAA003-E22	Marinimicrobia bacterium SCGC AAA003-E22	Marinimicrobia bacterium SCGC AAA003-E22	Marinimicrobia bacterium SCGC AAA003-E22	Marinimicrobia bacterium SCGC AAA003-E22	0	1	0	0	0	0	0	0	0	0	0	0	0	1	0	0	0	0	0	0	0	0	0	0
OTU_2275	Bacteria	Acidobacteria	Subgroup 26	uncultured bacterium SAT52-B4	uncultured bacterium SAT52-B4	uncultured bacterium SAT52-B4	uncultured bacterium SAT52-B4	0	0	0	0	0	0	0	0	0	0	0	0	0	1	0	0	1	0	0	0	0	0	0	0
OTU_2276	Bacteria	Chloroflexi	Dehalococcoidia	SAR202 clade	Unclassified	Unclassified	Unclassified	0	3	0	0	0	0	0	0	0	0	0	0	0	0	2	0	0	0	0	0	0	0	0	0
OTU_2278	Bacteria	Gemmatimonadetes	BD2-11 terrestrial group	uncultured actinobacterium HF0500_01C15	uncultured actinobacterium HF0500_01C15	uncultured actinobacterium HF0500_01C15	uncultured actinobacterium HF0500_01C15	0	3	2	0	0	0	0	0	0	0	0	0	0	2	15	0	0	0	0	0	0	0	0	0
OTU_2279	Bacteria	Planctomycetes	Planctomycetacia	Pirellulales	Pirellulaceae	uncultured	Unclassified	0	3	0	0	0	0	0	0	0	0	0	0	0	2	0	0	0	0	0	0	0	0	0	0
OTU_2281	Bacteria	Proteobacteria	Alphaproteobacteria	SAR11 clade	Clade II	Unclassified	Unclassified	42	35	5	0	0	0	3	1	3	0	0	0	5	12	0	0	0	1	5	1	1	2	4	0
OTU_2282	Bacteria	Chloroflexi	Dehalococcoidia	SAR202 clade	hydrothermal vent metagenome	hydrothermal vent metagenome	hydrothermal vent metagenome	0	72	66	0	8	11	0	2	45	0	0	0	1	55	67	7	17	14	0	0	4	16	0	0
OTU_2285	Bacteria	PAUC34f	uncultured bacterium	uncultured bacterium	uncultured bacterium	uncultured bacterium	uncultured bacterium	0	1	1	0	0	0	0	0	3	0	0	0	0	9	4	0	0	0	0	0	0	0	0	0
OTU_2287	Bacteria	Actinobacteria	Acidimicrobiia	Microtrichales	Microtrichaceae	Sva0996 marine group	uncultured bacterium	1	34	0	0	0	0	1	0	0	0	0	0	1	17	0	0	0	0	0	0	0	0	1	0
OTU_2288	Bacteria	Marinimicrobia (SAR406 clade)	uncultured bacterium	uncultured bacterium	uncultured bacterium	uncultured bacterium	uncultured bacterium	0	7	0	0	0	0	0	0	0	0	0	0	0	0	0	0	0	0	0	0	0	0	7	0
OTU_2289	Bacteria	Marinimicrobia (SAR406 clade)	uncultured bacterium	uncultured bacterium	uncultured bacterium	uncultured bacterium	uncultured bacterium	0	4	0	0	0	0	0	0	0	0	0	0	0	3	0	0	0	0	0	0	0	0	0	0
OTU_229	Bacteria	Bacteroidetes	Bacteroidia	Flavobacteriales	Flavobacteriaceae	NS4 marine group	marine metagenome	21	0	3	0	0	0	42	0	0	0	0	0	54	3	0	5	1	1	11	0	0	0	36	0
OTU_2290	Bacteria	Proteobacteria	Alphaproteobacteria	Rhizobiales	Beijerinckiaceae	Methylobacterium	Unclassified	0	0	0	0	0	0	0	1	1	0	0	0	0	0	0	0	0	0	0	1	2	0	0	0
OTU_2292	Bacteria	Marinimicrobia (SAR406 clade)	uncultured bacterium	uncultured bacterium	uncultured bacterium	uncultured bacterium	uncultured bacterium	0	3	0	0	0	0	0	0	0	0	0	0	0	1	0	0	0	0	0	0	0	0	0	0
OTU_2293	Bacteria	Proteobacteria	Gammaproteobacteria	Piscirickettsiales	Piscirickettsiaceae	Candidatus Endoecteinascidia	Unclassified	0	2	0	0	0	0	0	0	0	0	0	0	0	0	0	0	0	0	0	0	0	0	0	0
OTU_2294	Bacteria	Bacteroidetes	Bacteroidia	Flavobacteriales	Flavobacteriaceae	NS2b marine group	uncultured bacterium	0	0	0	0	0	0	1	0	0	0	0	0	0	0	0	0	0	0	1	0	0	0	0	0
OTU_2296	Bacteria	Proteobacteria	Gammaproteobacteria	Piscirickettsiales	Piscirickettsiaceae	Candidatus Endoecteinascidia	uncultured bacterium	0	0	2	0	0	0	0	0	0	0	0	0	0	1	0	0	0	0	0	0	0	0	0	0
OTU_2297	Bacteria	Marinimicrobia (SAR406 clade)	uncultured Candidatus Marinimicrobia bacterium	uncultured Candidatus Marinimicrobia bacterium	uncultured Candidatus Marinimicrobia bacterium	uncultured Candidatus Marinimicrobia bacterium	uncultured Candidatus Marinimicrobia bacterium	0	0	1	0	0	0	0	0	0	0	0	0	0	2	0	0	0	0	0	0	0	0	0	0
OTU_2298	Bacteria	Lentisphaerae	Lentisphaeria	Lentisphaerales	Lentisphaeraceae	Lentisphaera	uncultured bacterium	0	4	2	0	0	2	0	0	0	0	0	0	0	3	3	2	0	3	0	0	0	0	6	0
OTU_23	Bacteria	Patescibacteria	Gracilibacteria	Candidatus Peregrinibacteria	uncultured bacterium	uncultured bacterium	uncultured bacterium	1	9	1	86	110	68	1	8	0	7	0	0	0	0	48	55	49	11	33	0	1	0	0	0
OTU_230	Bacteria	Proteobacteria	Deltaproteobacteria	NB1-j	uncultured bacterium	uncultured bacterium	uncultured bacterium	0	2	16	1	9	3	0	0	41	0	5	1	0	0	12	24	3	5	0	1	62	21	30	0
OTU_2300	Bacteria	Proteobacteria	Gammaproteobacteria	Coxiellales	Coxiellaceae	Coxiella	uncultured Legionella sp.	0	0	0	2	0	0	0	0	0	0	0	0	0	0	0	0	0	0	0	0	0	0	0	0
OTU_2301	Bacteria	Proteobacteria	Gammaproteobacteria	Pseudomonadales	Moraxellaceae	uncultured marine bacterium	uncultured marine bacterium	0	0	0	2	0	0	0	0	0	0	0	0	0	0	0	0	0	0	0	0	0	0	0	0
OTU_2302	Bacteria	Proteobacteria	Deltaproteobacteria	Desulfarculales	Desulfarculaceae	uncultured	Unclassified	0	0	0	0	0	0	0	5	0	0	0	0	0	0	0	0	0	0	0	1	0	0	0	0
OTU_2304	Bacteria	Marinimicrobia (SAR406 clade)	uncultured bacterium	uncultured bacterium	uncultured bacterium	uncultured bacterium	uncultured bacterium	0	8	0	0	0	0	0	0	0	0	0	0	0	2	0	0	0	0	0	0	0	0	0	0
OTU_2306	Bacteria	Actinobacteria	Acidimicrobiia	Actinomarinales	Actinomarinaceae	Candidatus Actinomarina	uncultured bacterium	5	0	0	0	0	0	0	0	0	0	0	0	2	0	0	0	0	0	0	0	0	0	0	0
OTU_2307	Bacteria	Chloroflexi	Dehalococcoidia	SAR202 clade	uncultured bacterium	uncultured bacterium	uncultured bacterium	0	2	0	0	0	0	0	0	0	0	0	0	0	0	0	0	0	0	0	0	0	0	0	0
OTU_2309	Bacteria	Proteobacteria	Deltaproteobacteria	Myxococcales	P3OB-42	Unclassified	Unclassified	0	3	0	0	0	0	0	0	0	0	0	0	0	0	0	0	0	0	0	0	0	0	0	0
OTU_231	Bacteria	Marinimicrobia (SAR406 clade)	uncultured Candidatus Marinimicrobia bacterium	uncultured Candidatus Marinimicrobia bacterium	uncultured Candidatus Marinimicrobia bacterium	uncultured Candidatus Marinimicrobia bacterium	uncultured Candidatus Marinimicrobia bacterium	2	227	317	21	53	104	0	0	16	1	0	0	1	172	322	33	64	66	0	6	0	0	1	0
OTU_2310	Bacteria	Proteobacteria	Alphaproteobacteria	Rhodovibrionales	Kiloniellaceae	uncultured	uncultured bacterium	0	1	0	0	0	0	0	0	0	0	0	0	0	1	0	0	0	0	0	0	0	0	0	0
OTU_2312	Bacteria	Planctomycetes	Planctomycetacia	Planctomycetales	uncultured	uncultured deep-sea bacterium	uncultured deep-sea bacterium	0	0	0	0	1	0	0	0	0	0	1	1	0	0	0	1	0	0	0	0	0	0	0	0
OTU_2316	Bacteria	Bacteroidetes	Bacteroidia	Flavobacteriales	NS9 marine group	uncultured bacterium	uncultured bacterium	0	0	1	0	0	0	0	0	0	0	0	0	0	0	3	0	0	0	0	0	0	0	0	0
OTU_2317	Bacteria	Proteobacteria	Alphaproteobacteria	SAR11 clade	Clade II	uncultured organism	uncultured organism	0	0	0	0	1	1	0	0	0	0	0	0	0	0	1	0	0	0	0	0	0	0	0	0
OTU_232	Bacteria	Chloroflexi	TK10	marine metagenome	marine metagenome	marine metagenome	marine metagenome	0	9	8	8	33	14	0	0	0	0	0	0	0	4	2	11	16	16	0	0	0	0	0	0
OTU_2320	Bacteria	Marinimicrobia (SAR406 clade)	Marinimicrobia bacterium SCGC AAA003-L08	Marinimicrobia bacterium SCGC AAA003-L08	Marinimicrobia bacterium SCGC AAA003-L08	Marinimicrobia bacterium SCGC AAA003-L08	Marinimicrobia bacterium SCGC AAA003-L08	0	1	1	0	0	1	0	0	0	0	0	0	0	0	1	0	0	0	0	0	0	0	0	0
OTU_2321	Bacteria	Cyanobacteria	Oxyphotobacteria	Synechococcales	Cyanobiaceae	Unclassified	Unclassified	0	0	0	0	0	0	0	0	0	0	0	0	2	0	0	0	0	0	0	0	0	0	0	0
OTU_2322	Bacteria	Proteobacteria	Gammaproteobacteria	KI89A clade	uncultured bacterium	uncultured bacterium	uncultured bacterium	2	0	0	0	0	0	0	0	0	0	0	0	4	0	0	0	0	0	0	0	0	0	0	0
OTU_2323	Bacteria	Proteobacteria	Alphaproteobacteria	Rhizobiales	Beijerinckiaceae	Methylobacterium	Unclassified	0	0	0	0	1	0	0	3	3	3	1	1	0	0	0	0	0	0	2	6	3	2	7	0
OTU_2324	Bacteria	Proteobacteria	Gammaproteobacteria	Alteromonadales	Alteromonadaceae	Alteromonas	Unclassified	0	0	0	1	0	0	0	0	0	0	1	0	0	0	0	0	0	0	0	0	0	0	0	0
OTU_2329	Bacteria	Marinimicrobia (SAR406 clade)	Unclassified	Unclassified	Unclassified	Unclassified	Unclassified	0	4	2	3	8	7	0	0	0	0	0	0	0	2	5	15	7	9	0	0	0	0	0	0
OTU_233	Bacteria	Planctomycetes	Planctomycetacia	Pirellulales	Pirellulaceae	uncultured	uncultured planctomycete	8	7	7	2	11	16	14	17	4	1	0	0	10	14	5	38	18	8	41	2	13	7	3	0
OTU_2331	Bacteria	Acidobacteria	Subgroup 11	uncultured bacterium KM3-18-F8	uncultured bacterium KM3-18-F8	uncultured bacterium KM3-18-F8	uncultured bacterium KM3-18-F8	0	0	0	0	0	1	0	0	0	0	0	0	0	0	0	0	0	1	0	0	0	0	0	0
OTU_2332	Bacteria	Chloroflexi	Dehalococcoidia	SAR202 clade	Unclassified	Unclassified	Unclassified	0	0	0	0	0	0	0	0	0	0	0	0	0	0	0	0	0	6	0	0	0	0	0	0
OTU_2333	Bacteria	Proteobacteria	Deltaproteobacteria	Myxococcales	Eel-36e1D6	uncultured bacterium	uncultured bacterium	0	0	0	0	0	0	0	0	0	0	0	0	0	0	0	3	0	0	0	0	0	0	0	0
OTU_2335	Bacteria	Planctomycetes	Phycisphaerae	Phycisphaerales	Phycisphaeraceae	uncultured	Unclassified	0	0	0	0	0	0	0	0	0	0	0	0	0	0	5	0	0	0	0	0	0	0	0	0
OTU_2336	Bacteria	Planctomycetes	Planctomycetacia	Pirellulales	Pirellulaceae	Rhodopirellula	uncultured planctomycete	0	0	7	5	0	0	0	0	1	0	0	0	0	0	6	9	0	0	0	0	3	0	0	0
OTU_2337	Bacteria	Margulisbacteria	marine metagenome	marine metagenome	marine metagenome	marine metagenome	marine metagenome	0	1	1	0	0	0	0	0	0	0	0	0	0	2	5	0	0	1	0	0	0	0	0	0
OTU_2338	Bacteria	Chloroflexi	Dehalococcoidia	SAR202 clade	uncultured bacterium	uncultured bacterium	uncultured bacterium	0	0	0	0	0	0	0	0	0	0	0	0	0	0	1	2	0	0	0	0	0	0	0	0
OTU_234	Bacteria	Proteobacteria	Alphaproteobacteria	Rickettsiales	AB1	uncultured marine bacterium	uncultured marine bacterium	0	0	0	0	0	0	0	0	0	0	0	0	0	0	0	0	0	0	22	0	0	0	2	0
OTU_2343	Bacteria	Proteobacteria	Gammaproteobacteria	Betaproteobacteriales	Burkholderiaceae	uncultured	Unclassified	0	0	0	0	0	0	0	0	0	2	0	0	0	0	0	0	0	0	0	0	0	0	0	0
OTU_2344	Bacteria	Proteobacteria	Deltaproteobacteria	Myxococcales	Blfdi19	uncultured bacterium	uncultured bacterium	0	4	3	0	0	0	0	0	2	0	0	0	0	0	0	0	0	0	0	0	0	0	0	0
OTU_2345	Bacteria	Planctomycetes	Pla3 lineage	uncultured bacterium	uncultured bacterium	uncultured bacterium	uncultured bacterium	0	0	0	0	0	0	0	0	2	0	0	0	0	0	2	0	0	0	0	0	1	0	0	0
OTU_2346	Bacteria	Chloroflexi	Dehalococcoidia	SAR202 clade	hydrothermal vent metagenome	hydrothermal vent metagenome	hydrothermal vent metagenome	0	0	0	0	0	0	0	1	0	0	0	0	0	0	0	0	0	2	0	0	0	0	0	0
OTU_2348	Bacteria	Proteobacteria	Deltaproteobacteria	RCP2-54	hydrothermal vent metagenome	hydrothermal vent metagenome	hydrothermal vent metagenome	0	0	0	0	4	1	0	0	0	0	0	0	0	0	0	1	0	7	0	0	0	0	0	0
OTU_2349	Bacteria	Proteobacteria	Gammaproteobacteria	Oceanospirillales	Halomonadaceae	Halomonas	Unclassified	0	1	0	1	0	0	1	0	0	0	0	0	0	0	0	0	1	0	0	0	0	0	0	0
OTU_235	Bacteria	Proteobacteria	Alphaproteobacteria	Rhodospirillales	Magnetospiraceae	Magnetospira	uncultured bacterium	0	0	32	0	2	0	0	0	11	0	0	0	0	0	1	0	3	0	0	0	0	2	0	0
OTU_2350	Bacteria	Proteobacteria	Alphaproteobacteria	Rickettsiales	SM2D12	Unclassified	Unclassified	0	0	0	0	0	0	0	0	0	0	0	0	0	0	2	0	0	0	0	0	0	0	0	0
OTU_2351	Bacteria	Actinobacteria	Actinobacteria	Propionibacteriales	Propionibacteriaceae	uncultured	uncultured Actinomycetales bacterium	0	2	0	0	1	0	0	0	0	0	0	0	1	0	0	2	0	0	4	0	0	0	0	0
OTU_2352	Bacteria	Actinobacteria	Acidimicrobiia	Actinomarinales	Actinomarinaceae	Candidatus Actinomarina	uncultured marine eukaryote	0	1	0	0	0	0	4	0	0	0	0	0	8	0	0	0	0	0	4	0	0	0	0	0
OTU_2355	Bacteria	Planctomycetes	OM190	Unclassified	Unclassified	Unclassified	Unclassified	0	1	0	0	0	0	0	0	0	0	0	0	0	1	0	0	0	0	0	0	0	0	1	0
OTU_2358	Bacteria	Proteobacteria	Deltaproteobacteria	Unclassified	Unclassified	Unclassified	Unclassified	0	0	0	0	0	1	0	0	3	0	0	0	0	0	0	0	0	0	0	0	3	0	8	0
OTU_2359	Bacteria	Patescibacteria	Saccharimonadia	Saccharimonadales	Unclassified	Unclassified	Unclassified	0	0	0	0	0	0	0	0	0	2	0	0	0	0	0	0	0	0	0	0	0	0	0	0
OTU_236	Bacteria	Proteobacteria	Alphaproteobacteria	Rhodobacterales	Rhodobacteraceae	Unclassified	Unclassified	0	0	0	2	6	33	0	0	0	0	0	0	0	0	0	2	2	6	0	0	0	0	0	0
OTU_2360	Bacteria	Bacteroidetes	Chlorobia	Chlorobiales	Chlorobiaceae	Chlorobaculum	uncultured Chlorobium sp.	0	0	0	0	0	0	0	0	0	3	0	0	0	0	0	0	0	0	0	0	0	0	0	0
OTU_2362	Bacteria	Verrucomicrobia	Verrucomicrobiae	Verrucomicrobiales	DEV007	uncultured Verrucomicrobiales bacterium	uncultured Verrucomicrobiales bacterium	0	0	0	0	0	0	0	0	3	0	0	0	0	1	1	0	0	0	0	0	0	0	0	0
OTU_2363	Bacteria	Proteobacteria	Deltaproteobacteria	Myxococcales	P3OB-42	uncultured bacterium	uncultured bacterium	0	0	0	0	0	0	0	4	1	0	0	0	0	0	0	0	0	0	0	2	2	0	0	0
OTU_2364	Bacteria	Proteobacteria	Deltaproteobacteria	Unclassified	Unclassified	Unclassified	Unclassified	0	2	0	0	0	0	0	0	3	0	0	0	0	0	0	0	0	0	0	0	0	0	0	0
OTU_2365	Bacteria	Proteobacteria	Alphaproteobacteria	SAR11 clade	Clade II	uncultured alpha proteobacterium	uncultured alpha proteobacterium	0	24	21	1	3	10	0	0	19	0	1	0	0	13	51	7	3	14	0	17	23	1	9	0
OTU_2366	Bacteria	Planctomycetes	OM190	uncultured planctomycete	uncultured planctomycete	uncultured planctomycete	uncultured planctomycete	0	0	0	0	0	0	0	0	1	0	0	0	0	0	0	0	0	0	0	0	1	0	0	0
OTU_2369	Bacteria	Proteobacteria	Alphaproteobacteria	uncultured	unidentified marine bacterioplankton	unidentified marine bacterioplankton	unidentified marine bacterioplankton	1	0	0	0	0	0	0	0	0	0	0	0	0	0	0	0	0	0	1	0	0	2	1	0
OTU_237	Bacteria	Planctomycetes	Phycisphaerae	Phycisphaerales	Phycisphaeraceae	Urania-1B-19 marine sediment group	uncultured bacterium	10	0	0	1	0	0	1	0	8	0	0	0	0	0	0	0	0	3	48	2	0	0	3	0
OTU_2370	Bacteria	Proteobacteria	Gammaproteobacteria	Oceanospirillales	Halomonadaceae	Halomonas	Halomonas aquamarina	3	0	0	0	0	0	0	0	0	0	0	0	0	0	0	0	0	0	0	0	0	0	0	0
OTU_2372	Bacteria	Proteobacteria	Gammaproteobacteria	SAR86 clade	uncultured marine bacterium	uncultured marine bacterium	uncultured marine bacterium	8	0	0	0	0	0	0	0	1	0	0	0	0	0	0	0	0	0	1	0	0	0	2	0
OTU_2373	Bacteria	Proteobacteria	Deltaproteobacteria	Bradymonadales	Unclassified	Unclassified	Unclassified	0	0	0	0	0	0	0	0	0	0	0	0	0	0	0	0	0	0	0	0	5	1	3	0
OTU_2374	Bacteria	Planctomycetes	Planctomycetacia	Pirellulales	Pirellulaceae	Pir4 lineage	uncultured bacterium	0	0	1	0	0	0	0	0	0	0	0	0	0	0	0	0	0	0	0	0	1	0	0	0
OTU_2375	Bacteria	Bacteroidetes	Bacteroidia	Flavobacteriales	Flavobacteriaceae	Winogradskyella	uncultured bacterium	0	0	0	0	0	0	0	0	0	0	0	0	0	0	0	0	0	0	0	0	1	0	1	0
OTU_2376	Bacteria	Proteobacteria	Deltaproteobacteria	PB19	uncultured delta proteobacterium	uncultured delta proteobacterium	uncultured delta proteobacterium	0	0	3	0	0	3	0	0	2	0	0	0	0	0	2	0	2	2	0	1	1	1	0	0
OTU_2377	Bacteria	Firmicutes	Bacilli	Bacillales	Bacillaceae	Salimicrobium	Salimicrobium halophilum	0	0	0	0	1	0	0	0	0	0	0	0	0	0	0	0	0	0	0	0	2	0	0	0
OTU_2378	Bacteria	Planctomycetes	Unclassified	Unclassified	Unclassified	Unclassified	Unclassified	0	0	0	0	0	2	0	1	3	0	2	9	0	0	0	0	0	0	0	2	4	2	5	0
OTU_2379	Bacteria	Proteobacteria	Deltaproteobacteria	Myxococcales	P3OB-42	uncultured bacterium	uncultured bacterium	0	0	0	0	0	0	0	1	0	0	0	0	0	0	0	0	0	0	0	0	5	0	2	0
OTU_238	Bacteria	Proteobacteria	Alphaproteobacteria	Micavibrionales	Micavibrionaceae	uncultured	uncultured organism	0	0	0	0	0	3	0	0	0	0	0	0	0	0	2	0	0	30	0	0	0	0	0	0
OTU_2380	Bacteria	Proteobacteria	Gammaproteobacteria	Enterobacteriales	Enterobacteriaceae	Pantoea	uncultured Pantoea sp.	0	0	0	0	0	0	0	0	1	1	0	0	0	0	0	0	0	0	0	0	1	0	0	0
OTU_2383	Bacteria	Bacteroidetes	Bacteroidia	Flavobacteriales	Flavobacteriaceae	Winogradskyella	uncultured Bacteroidetes bacterium	0	0	0	1	0	0	0	0	0	1	0	0	0	0	0	0	0	0	0	3	0	0	0	0
OTU_2384	Bacteria	Proteobacteria	Gammaproteobacteria	Alteromonadales	Alteromonadaceae	Alteromonas	Unclassified	0	0	0	0	0	0	0	0	0	11	0	0	0	0	0	0	0	0	0	0	0	0	0	0
OTU_2385	Bacteria	Bacteroidetes	Bacteroidia	Flavobacteriales	Flavobacteriaceae	Croceibacter	Croceibacter atlanticus HTCC2559	0	0	0	0	0	0	0	0	0	0	0	0	0	0	0	0	0	0	0	0	0	0	0	5
OTU_2387	Bacteria	Actinobacteria	Thermoleophilia	uncultured	uncultured bacterium	uncultured bacterium	uncultured bacterium	0	0	0	0	0	0	0	0	0	6	0	0	0	0	0	0	0	0	0	0	0	0	0	0
OTU_2388	Bacteria	Planctomycetes	Phycisphaerae	Phycisphaerales	Phycisphaeraceae	SM1A02	Gambierdiscus polynesiensis	0	0	0	0	0	0	0	0	0	0	0	0	0	0	0	0	0	0	0	0	0	0	0	2
OTU_239	Bacteria	Kiritimatiellaeota	Kiritimatiellae	WCHB1-41	Unclassified	Unclassified	Unclassified	0	2	1	5	2	4	0	5	12	0	0	0	0	0	6	13	6	4	0	2	13	13	33	0
OTU_2391	Bacteria	Proteobacteria	Deltaproteobacteria	Bradymonadales	uncultured Geobacteraceae bacterium	uncultured Geobacteraceae bacterium	uncultured Geobacteraceae bacterium	0	0	0	0	0	0	0	0	0	0	0	0	0	0	0	0	0	0	0	0	3	0	3	0
OTU_2392	Bacteria	Bacteroidetes	Rhodothermia	Balneolales	Balneolaceae	Balneola	uncultured bacterium	0	0	0	0	0	0	0	0	0	0	0	0	0	0	0	0	0	0	0	0	0	0	0	15
OTU_2393	Bacteria	Planctomycetes	OM190	Unclassified	Unclassified	Unclassified	Unclassified	0	0	0	0	0	0	0	0	0	0	0	0	0	0	0	0	0	0	0	0	0	0	0	4
OTU_2396	Bacteria	Proteobacteria	Gammaproteobacteria	Cellvibrionales	Spongiibacteraceae	uncultured	uncultured bacterium	0	0	0	3	0	0	0	0	0	1	0	0	0	0	0	0	0	0	0	0	0	0	0	0
OTU_2397	Bacteria	Proteobacteria	Gammaproteobacteria	Alteromonadales	Alteromonadaceae	Alteromonas	uncultured Aestuariibacter sp.	0	0	0	2	0	0	0	0	0	0	0	0	0	0	0	0	0	0	0	0	0	0	0	0
OTU_2398	Bacteria	Bacteroidetes	Bacteroidia	Flavobacteriales	Flavobacteriaceae	Mesonia	uncultured bacterium	0	0	1	86	0	2	0	0	0	0	0	0	0	0	0	30	1	29	0	0	0	0	2	0
OTU_2399	Bacteria	Marinimicrobia (SAR406 clade)	uncultured bacterium	uncultured bacterium	uncultured bacterium	uncultured bacterium	uncultured bacterium	0	0	3	0	0	0	0	0	0	0	0	0	0	0	0	0	0	0	0	0	0	0	0	0
OTU_2400	Bacteria	Marinimicrobia (SAR406 clade)	marine metagenome	marine metagenome	marine metagenome	marine metagenome	marine metagenome	0	3	0	0	0	0	0	0	0	0	0	0	0	0	0	0	0	0	0	0	0	0	0	0
OTU_2401	Bacteria	Proteobacteria	Deltaproteobacteria	NB1-j	uncultured bacterium	uncultured bacterium	uncultured bacterium	0	0	0	0	0	1	0	0	0	0	0	4	0	0	0	0	0	0	0	0	0	0	5	0
OTU_2403	Bacteria	Acidobacteria	Subgroup 6	uncultured bacterium KM3-25-B4	uncultured bacterium KM3-25-B4	uncultured bacterium KM3-25-B4	uncultured bacterium KM3-25-B4	0	5	0	0	0	0	0	0	0	0	0	0	0	0	0	0	0	0	0	0	0	0	0	0
OTU_2404	Bacteria	Bacteroidetes	Bacteroidia	Flavobacteriales	Unclassified	Unclassified	Unclassified	0	6	0	0	0	0	0	0	0	0	0	0	0	0	0	0	0	0	0	0	0	0	0	0
OTU_2406	Bacteria	Bacteroidetes	Bacteroidia	Flavobacteriales	Flavobacteriaceae	Salegentibacter	uncultured Salegentibacter sp.	0	0	0	8	10	0	0	0	0	1	4	5	0	0	0	0	0	0	0	0	0	0	0	0
OTU_2408	Bacteria	Proteobacteria	Deltaproteobacteria	Bdellovibrionales	Unclassified	Unclassified	Unclassified	0	1	1	0	0	2	0	3	0	0	0	0	0	0	0	0	0	0	0	0	0	0	0	0
OTU_2409	Bacteria	Marinimicrobia (SAR406 clade)	Marinimicrobia bacterium SCGC AAA003-E22	Marinimicrobia bacterium SCGC AAA003-E22	Marinimicrobia bacterium SCGC AAA003-E22	Marinimicrobia bacterium SCGC AAA003-E22	Marinimicrobia bacterium SCGC AAA003-E22	0	5	0	0	0	0	0	0	0	0	0	0	0	0	0	0	0	0	0	0	0	0	0	0
OTU_241	Bacteria	Bacteroidetes	Bacteroidia	Flavobacteriales	NS9 marine group	hydrothermal vent metagenome	hydrothermal vent metagenome	0	0	0	0	0	65	0	8	5	0	1	9	2	2	0	0	0	1	1	1	6	2	8	0
OTU_2410	Bacteria	Proteobacteria	Deltaproteobacteria	PB19	uncultured bacterium	uncultured bacterium	uncultured bacterium	0	1	0	0	0	2	0	0	0	0	0	0	0	1	2	0	1	0	0	0	0	2	1	0
OTU_2413	Bacteria	Firmicutes	Bacilli	Bacillales	Planococcaceae	Domibacillus	uncultured Bacillus sp.	0	0	0	0	0	0	0	0	0	0	0	0	0	0	0	0	0	0	0	0	0	0	3	0
OTU_2414	Bacteria	Proteobacteria	Deltaproteobacteria	PB19	uncultured delta proteobacterium	uncultured delta proteobacterium	uncultured delta proteobacterium	0	0	0	0	0	0	0	0	0	0	0	0	0	0	0	0	0	0	0	0	0	2	0	0
OTU_2415	Bacteria	Proteobacteria	Deltaproteobacteria	Myxococcales	Nannocystaceae	uncultured bacterium	uncultured bacterium	0	0	0	0	0	0	0	0	0	0	0	0	0	0	0	0	0	0	0	0	0	6	0	0
OTU_2416	Bacteria	Proteobacteria	Gammaproteobacteria	Vibrionales	Vibrionaceae	Vibrio	uncultured marine bacterium	0	0	0	0	0	0	0	0	0	0	0	0	0	0	0	0	0	0	0	0	0	0	2	0
OTU_2417	Bacteria	Proteobacteria	Deltaproteobacteria	NB1-j	uncultured bacterium	uncultured bacterium	uncultured bacterium	0	0	0	0	0	0	0	0	0	0	0	1	0	0	0	0	0	0	0	0	0	0	5	0
OTU_2419	Bacteria	PAUC34f	marine metagenome	marine metagenome	marine metagenome	marine metagenome	marine metagenome	0	0	0	0	0	0	0	0	0	0	0	0	0	0	0	0	0	0	0	0	0	0	6	0
OTU_242	Bacteria	Proteobacteria	Alphaproteobacteria	Alphaproteobacteria Incertae Sedis	Unknown Family	Acuticoccus	Acuticoccus yangtzensis	0	0	1	0	0	4	0	0	10	0	0	33	0	0	1	6	1	3	0	19	0	1	22	0
OTU_2421	Bacteria	Verrucomicrobia	Verrucomicrobiae	Verrucomicrobiales	DEV007	uncultured bacterium	uncultured bacterium	0	0	0	0	0	0	0	4	1	0	0	0	0	0	0	0	0	0	1	0	0	0	3	0
OTU_2423	Bacteria	Proteobacteria	Deltaproteobacteria	NB1-j	Unclassified	Unclassified	Unclassified	0	0	0	0	0	0	0	0	0	0	0	0	0	0	0	0	0	0	0	0	0	0	2	0
OTU_2424	Bacteria	Proteobacteria	Alphaproteobacteria	Rhodospirillales	Magnetospiraceae	Magnetospira	uncultured bacterium	0	0	0	0	0	0	0	0	0	0	0	0	0	0	0	0	0	0	0	0	0	0	3	0
OTU_2425	Bacteria	Chloroflexi	Ktedonobacteria	B12-WMSP1	uncultured bacterium	uncultured bacterium	uncultured bacterium	0	0	0	0	0	0	0	0	0	0	0	0	0	0	0	0	0	0	0	0	0	0	2	0
OTU_2426	Bacteria	Verrucomicrobia	Verrucomicrobiae	Opitutales	Puniceicoccaceae	Cerasicoccus	uncultured organism	0	0	3	0	0	0	0	0	0	0	0	0	0	1	0	0	0	0	0	0	0	0	0	0
OTU_2428	Bacteria	Proteobacteria	Gammaproteobacteria	Oceanospirillales	Halomonadaceae	Halomonas	Unclassified	0	0	1	1	0	0	0	0	0	0	0	0	0	0	0	0	0	0	0	0	0	0	0	0
OTU_2429	Bacteria	Proteobacteria	Deltaproteobacteria	Oligoflexales	Oligoflexaceae	uncultured	Unclassified	0	0	6	0	0	0	0	0	0	0	0	0	0	0	2	0	0	0	0	0	0	0	0	0
OTU_243	Bacteria	Proteobacteria	Gammaproteobacteria	Vibrionales	Vibrionaceae	Vibrio	Vibrio chagasii	0	1	0	0	0	0	0	1	0	0	0	0	0	0	0	0	0	0	8	324	0	0	0	0
OTU_2430	Bacteria	Marinimicrobia (SAR406 clade)	hydrothermal vent metagenome	hydrothermal vent metagenome	hydrothermal vent metagenome	hydrothermal vent metagenome	hydrothermal vent metagenome	0	0	1	0	0	0	0	0	0	0	0	0	0	0	2	0	0	0	0	0	0	0	0	0
OTU_2432	Bacteria	PAUC34f	uncultured bacterium	uncultured bacterium	uncultured bacterium	uncultured bacterium	uncultured bacterium	0	0	2	0	2	2	0	0	0	0	0	0	0	0	3	0	0	0	0	0	0	3	1	0
OTU_2434	Bacteria	Proteobacteria	Gammaproteobacteria	Cellvibrionales	Spongiibacteraceae	Dasania	uncultured bacterium	0	2	0	0	0	0	0	2	1	0	0	0	0	0	0	0	0	0	0	0	0	0	0	0
OTU_2435	Bacteria	Proteobacteria	Deltaproteobacteria	NB1-j	uncultured bacterium	uncultured bacterium	uncultured bacterium	0	0	0	0	0	0	0	3	0	0	0	0	0	1	0	0	0	0	0	3	0	0	0	0
OTU_2436	Bacteria	Actinobacteria	KIST-JJY010	uncultured bacterium	uncultured bacterium	uncultured bacterium	uncultured bacterium	0	0	0	1	0	0	0	6	0	0	0	0	0	1	0	0	0	0	0	3	0	0	0	0
OTU_2437	Bacteria	Chloroflexi	Dehalococcoidia	SAR202 clade	Unclassified	Unclassified	Unclassified	0	0	0	0	2	0	0	0	0	0	0	0	0	0	0	0	0	0	0	0	0	0	0	0
OTU_2438	Bacteria	Unclassified	Unclassified	Unclassified	Unclassified	Unclassified	Unclassified	0	0	0	0	0	4	0	0	0	0	0	0	0	0	0	0	0	0	0	0	0	0	0	0
OTU_244	Bacteria	Proteobacteria	Gammaproteobacteria	KI89A clade	uncultured bacterium	uncultured bacterium	uncultured bacterium	0	10	21	0	0	4	0	0	1	0	0	0	0	0	18	4	2	2	0	0	0	0	0	0
OTU_2441	Bacteria	Proteobacteria	Gammaproteobacteria	Unclassified	Unclassified	Unclassified	Unclassified	0	0	0	0	0	2	0	0	0	0	0	0	0	0	0	0	0	0	0	0	0	0	0	0
OTU_2443	Bacteria	Proteobacteria	Alphaproteobacteria	Rhodobacterales	Rhodobacteraceae	Unclassified	Unclassified	0	0	0	0	0	1	0	0	0	0	0	2	0	0	0	0	0	0	0	0	0	0	0	0
OTU_2445	Bacteria	Proteobacteria	Gammaproteobacteria	Coxiellales	Coxiellaceae	Coxiella	uncultured bacterium	0	0	0	1	1	0	0	0	0	0	0	0	0	0	0	0	0	0	0	0	0	0	0	0
OTU_2447	Bacteria	Proteobacteria	Gammaproteobacteria	Alteromonadales	Pseudoalteromonadaceae	Pseudoalteromonas	Unclassified	0	0	0	0	0	0	2	0	0	0	0	0	0	0	0	0	0	0	0	0	0	0	0	0
OTU_2448	Bacteria	Proteobacteria	Deltaproteobacteria	Unclassified	Unclassified	Unclassified	Unclassified	0	0	0	0	0	0	1	2	0	0	0	0	0	0	0	0	0	0	0	0	0	0	0	0
OTU_245	Bacteria	Proteobacteria	Alphaproteobacteria	Caulobacterales	Hyphomonadaceae	Oceanicaulis	Oceanicaulis sp. HTCC2633	0	1	7	37	0	0	0	0	24	15	0	0	0	1	0	0	0	0	0	2	0	0	3	0
OTU_2450	Bacteria	Actinobacteria	Actinobacteria	Actinomycetales	Actinomycetaceae	Actinomyces	Unclassified	0	0	0	0	0	0	0	1	0	0	0	0	0	0	0	1	0	0	0	0	0	0	0	0
OTU_2453	Bacteria	Planctomycetes	Planctomycetacia	Planctomycetales	Rubinisphaeraceae	uncultured	uncultured planctomycete	0	0	0	0	0	0	0	3	0	0	0	0	0	0	0	0	0	0	0	0	0	0	0	0
OTU_2455	Bacteria	Bacteroidetes	Bacteroidia	Flavobacteriales	Schleiferiaceae	Schleiferia	uncultured bacterium	0	1	0	0	0	0	0	2	0	0	0	0	0	1	0	0	0	0	0	0	0	0	0	0
OTU_2456	Bacteria	Proteobacteria	Deltaproteobacteria	SAR324 clade(Marine group B)	uncultured bacterium HF0200_14D13	uncultured bacterium HF0200_14D13	uncultured bacterium HF0200_14D13	2	23	3	1	1	0	0	6	6	0	0	0	0	3	4	0	0	0	0	11	1	0	0	0
OTU_2457	Bacteria	Proteobacteria	Gammaproteobacteria	Legionellales	Legionellaceae	uncultured	uncultured bacterium	0	0	0	2	0	0	0	0	0	0	1	0	0	0	0	2	0	0	0	0	0	0	0	0
OTU_2459	Bacteria	Proteobacteria	Gammaproteobacteria	Alteromonadales	Pseudoalteromonadaceae	Pseudoalteromonas	Unclassified	0	0	0	0	0	0	2	1	0	0	0	0	0	0	0	0	0	0	0	0	0	0	0	0
OTU_2460	Bacteria	Dependentiae	Babeliae	Babeliales	Vermiphilaceae	uncultured organism	uncultured organism	0	0	0	0	0	2	0	0	0	0	0	0	0	0	0	0	0	0	0	0	0	0	0	0
OTU_2461	Bacteria	Planctomycetes	Unclassified	Unclassified	Unclassified	Unclassified	Unclassified	0	0	1	0	0	2	0	0	0	0	0	0	0	0	0	0	0	0	0	0	0	0	0	0
OTU_2462	Bacteria	Dadabacteria	Dadabacteriia	Dadabacteriales	metagenome	metagenome	metagenome	1	0	0	0	0	0	1	0	0	0	0	0	8	1	0	0	0	0	0	0	0	0	0	0
OTU_2464	Bacteria	Actinobacteria	Acidimicrobiia	Actinomarinales	Actinomarinaceae	Candidatus Actinomarina	uncultured marine eukaryote	0	0	0	0	0	0	1	0	0	0	0	0	4	0	0	0	0	0	0	0	0	0	0	0
OTU_2465	Bacteria	Proteobacteria	Gammaproteobacteria	Coxiellales	Coxiellaceae	Coxiella	Unclassified	0	0	0	0	0	0	0	0	0	0	0	0	1	0	0	0	0	0	2	0	0	0	0	0
OTU_2466	Bacteria	Cyanobacteria	Oxyphotobacteria	Synechococcales	Cyanobiaceae	Cyanobium PCC-6307	uncultured cyanobacterium	0	0	0	0	0	0	0	0	0	0	0	0	1	0	0	0	0	1	0	0	0	0	0	0
OTU_2468	Bacteria	Actinobacteria	Actinobacteria	Streptomycetales	Streptomycetaceae	Streptomyces	uncultured Streptomyces sp.	0	0	0	0	0	0	0	0	0	4	0	0	0	0	0	0	0	0	0	0	0	0	0	0
OTU_2469	Bacteria	Proteobacteria	Deltaproteobacteria	Bdellovibrionales	Bdellovibrionaceae	OM27 clade	uncultured marine bacterium	0	2	0	0	0	0	0	0	2	0	0	0	0	1	0	0	0	0	0	0	0	0	0	0
OTU_247	Bacteria	Proteobacteria	Alphaproteobacteria	Sphingomonadales	Sphingomonadaceae	Sphingomonas	unidentified	1	0	0	0	0	2	0	5	5	0	0	6	0	0	0	0	0	0	3	0	0	1	0	0
OTU_2472	Bacteria	Proteobacteria	Deltaproteobacteria	Unclassified	Unclassified	Unclassified	Unclassified	0	0	0	1	0	0	0	0	5	0	0	0	0	0	0	0	0	0	0	0	0	0	0	0
OTU_2473	Bacteria	Proteobacteria	Alphaproteobacteria	Rhizobiales	Beijerinckiaceae	Methylobacterium	Unclassified	0	0	0	0	0	0	0	0	1	0	0	1	0	0	0	0	0	1	0	0	1	0	0	0
OTU_2474	Bacteria	Verrucomicrobia	Verrucomicrobiae	Opitutales	Puniceicoccaceae	Lentimonas	uncultured bacterium	1	0	0	0	0	0	0	0	3	0	0	0	0	0	0	0	0	0	0	0	0	0	0	0
OTU_2475	Bacteria	Proteobacteria	Deltaproteobacteria	Unclassified	Unclassified	Unclassified	Unclassified	0	0	0	0	0	0	0	0	7	0	0	0	0	0	0	0	0	0	0	0	0	0	0	0
OTU_2476	Bacteria	PAUC34f	uncultured bacterium	uncultured bacterium	uncultured bacterium	uncultured bacterium	uncultured bacterium	0	0	1	0	1	4	0	0	0	0	0	0	0	0	0	0	0	1	0	0	0	0	0	0
OTU_2477	Bacteria	Proteobacteria	Gammaproteobacteria	Thiomicrospirales	Thioglobaceae	SUP05 cluster	Unclassified	0	1	0	0	0	1	0	0	0	0	0	0	0	1	0	0	0	0	0	0	0	0	0	0
OTU_2479	Bacteria	Planctomycetes	Planctomycetacia	Pirellulales	Pirellulaceae	Pir4 lineage	uncultured bacterium	0	0	0	0	0	0	0	0	0	0	0	3	0	0	0	0	0	0	0	0	0	0	0	0
OTU_248	Bacteria	Proteobacteria	Gammaproteobacteria	SAR86 clade	uncultured marine bacterium 311	uncultured marine bacterium 311	uncultured marine bacterium 311	0	9	80	19	34	26	0	1	1	1	0	0	0	6	52	26	6	42	0	0	0	0	0	0
OTU_2480	Bacteria	Proteobacteria	Alphaproteobacteria	Sphingomonadales	Sphingomonadaceae	Altererythrobacter	Unclassified	1	0	0	14	9	11	0	4	3	1	1	30	4	0	1	4	3	5	2	3	1	0	2	4
OTU_2481	Bacteria	Proteobacteria	Gammaproteobacteria	Alteromonadales	Alteromonadaceae	Alteromonas	Unclassified	0	0	0	0	0	0	0	0	0	1	1	0	0	0	0	0	0	0	0	0	0	0	0	0
OTU_2484	Bacteria	Proteobacteria	Alphaproteobacteria	Rhodospirillales	Magnetospiraceae	uncultured	uncultured bacterium	0	2	0	0	0	3	0	0	0	0	0	0	0	1	0	0	0	2	0	0	0	0	0	0
OTU_2488	Bacteria	Proteobacteria	Deltaproteobacteria	PB19	uncultured bacterium	uncultured bacterium	uncultured bacterium	0	0	1	0	0	3	0	0	0	0	0	0	0	0	0	0	0	0	0	0	0	0	0	0
OTU_2489	Bacteria	Planctomycetes	Planctomycetacia	Pirellulales	Pirellulaceae	uncultured	uncultured deep-sea bacterium	0	0	2	1	1	3	0	0	0	0	0	0	0	0	1	5	4	0	0	0	1	1	0	0
OTU_249	Bacteria	Planctomycetes	Planctomycetacia	Pirellulales	Pirellulaceae	Pir4 lineage	uncultured bacterium	1	8	17	4	1	2	0	2	40	2	0	0	0	11	16	29	1	0	0	8	11	0	0	0
OTU_2491	Bacteria	Proteobacteria	Alphaproteobacteria	Rhizobiales	Beijerinckiaceae	Methylobacterium	Unclassified	0	0	0	0	0	0	0	0	0	0	0	2	0	0	0	0	0	0	0	0	0	0	0	0
OTU_2492	Bacteria	Planctomycetes	Planctomycetacia	Pirellulales	Pirellulaceae	Pir4 lineage	uncultured bacterium	0	0	0	0	0	1	0	0	0	0	0	2	0	0	0	0	0	0	0	0	0	0	0	0
OTU_2493	Bacteria	Patescibacteria	Parcubacteria	Unclassified	Unclassified	Unclassified	Unclassified	0	0	0	0	1	1	0	0	0	0	0	0	0	0	0	2	1	0	0	0	0	0	0	0
OTU_2494	Bacteria	Proteobacteria	Gammaproteobacteria	Alteromonadales	Alteromonadaceae	Alteromonas	Unclassified	0	0	0	1	0	0	0	0	0	0	1	0	0	0	0	0	0	0	0	0	2	0	0	0
OTU_2495	Bacteria	Proteobacteria	Gammaproteobacteria	Steroidobacterales	Woeseiaceae	Woeseia	uncultured bacterium	0	0	0	0	0	1	0	0	0	0	1	0	0	0	0	0	0	0	0	0	0	0	0	0
OTU_2498	Bacteria	Bacteroidetes	Bacteroidia	Flavobacteriales	Flavobacteriaceae	Gramella	Gramella portivictoriae DSM 23547	0	0	0	2	0	0	0	0	0	0	0	6	0	0	0	0	0	0	0	0	0	0	0	0
OTU_2499	Bacteria	Actinobacteria	Acidimicrobiia	Microtrichales	Microtrichaceae	Sva0996 marine group	uncultured actinobacterium	0	0	0	0	0	0	0	0	0	0	0	2	0	0	0	0	0	0	0	0	0	0	0	0
OTU_25	Bacteria	Actinobacteria	Acidimicrobiia	Actinomarinales	Actinomarinaceae	Candidatus Actinomarina	uncultured bacterium	1033	24	0	0	3	3	273	1	1	0	0	8	1156	25	1	0	0	0	38	0	0	9	8	0
OTU_250	Bacteria	Proteobacteria	Gammaproteobacteria	SAR86 clade	marine metagenome	marine metagenome	marine metagenome	84	0	1	0	0	0	0	0	1	0	0	1	3	1	1	0	0	0	5	0	0	0	0	0
OTU_2503	Bacteria	Proteobacteria	Alphaproteobacteria	Sphingomonadales	Sphingomonadaceae	Unclassified	Unclassified	0	0	0	0	1	2	0	0	0	0	0	3	0	0	0	0	0	0	0	0	0	0	1	4
OTU_2504	Bacteria	Nitrospinae	Nitrospinia	Nitrospinales	Nitrospinaceae	Nitrospina	Unclassified	0	1	7	0	0	0	0	0	5	0	0	0	0	3	2	0	0	0	0	0	1	0	1	0
OTU_2505	Bacteria	Bacteroidetes	Bacteroidia	Flavobacteriales	Flavobacteriaceae	Aquibacter	uncultured bacterium	0	0	1	0	0	0	0	0	1	0	0	0	0	0	0	0	0	0	7	0	0	0	0	0
OTU_2506	Bacteria	Proteobacteria	Alphaproteobacteria	Kordiimonadales	uncultured	uncultured alpha proteobacterium	uncultured alpha proteobacterium	0	0	0	0	0	0	0	0	0	0	0	0	0	0	0	0	0	0	0	0	2	0	0	0
OTU_2507	Bacteria	Bacteroidetes	Bacteroidia	Flavobacteriales	NS9 marine group	Unclassified	Unclassified	0	0	0	0	0	0	0	0	0	0	0	0	0	0	0	0	0	0	5	0	0	0	0	0
OTU_2508	Bacteria	Proteobacteria	Deltaproteobacteria	Bdellovibrionales	Bdellovibrionaceae	OM27 clade	uncultured bacterium	0	0	0	0	0	0	0	0	4	0	0	0	0	0	0	0	0	3	0	3	5	1	0	0
OTU_251	Bacteria	Proteobacteria	Gammaproteobacteria	Betaproteobacteriales	Burkholderiaceae	MWH-UniP1 aquatic group	uncultured bacterium	36	0	0	0	0	0	7	0	1	0	0	0	2	0	0	0	0	0	7	0	0	0	0	0
OTU_2510	Bacteria	Proteobacteria	Deltaproteobacteria	SAR324 clade(Marine group B)	marine metagenome	marine metagenome	marine metagenome	0	0	0	0	0	0	0	0	0	0	0	0	0	0	0	0	0	4	0	0	0	0	0	0
OTU_2512	Bacteria	Proteobacteria	Alphaproteobacteria	Puniceispirillales	SAR116 clade	uncultured proteobacterium	uncultured proteobacterium	0	0	3	0	0	0	0	0	0	0	1	0	0	0	0	1	0	2	0	0	0	1	1	0
OTU_2513	Bacteria	Planctomycetes	OM190	uncultured bacterium	uncultured bacterium	uncultured bacterium	uncultured bacterium	0	0	0	0	0	0	0	1	0	0	0	0	0	0	0	0	0	0	0	14	0	0	0	0
OTU_2514	Bacteria	Proteobacteria	Deltaproteobacteria	Bradymonadales	uncultured delta proteobacterium	uncultured delta proteobacterium	uncultured delta proteobacterium	0	2	1	0	0	0	0	0	0	0	0	0	0	0	0	0	0	0	0	0	9	0	0	0
OTU_2515	Bacteria	Chloroflexi	Dehalococcoidia	SAR202 clade	hydrothermal vent metagenome	hydrothermal vent metagenome	hydrothermal vent metagenome	0	0	0	0	0	1	0	0	0	0	0	0	0	0	0	1	0	0	0	0	0	0	0	0
OTU_2516	Bacteria	PAUC34f	uncultured bacterium	uncultured bacterium	uncultured bacterium	uncultured bacterium	uncultured bacterium	0	0	1	1	0	1	0	0	1	0	0	0	0	0	2	0	0	2	0	0	0	0	0	0
OTU_2518	Bacteria	Proteobacteria	Gammaproteobacteria	AT-s2-59	Unclassified	Unclassified	Unclassified	0	0	0	0	1	1	0	0	0	0	0	0	0	0	0	1	0	0	0	0	0	0	0	0
OTU_252	Bacteria	Marinimicrobia (SAR406 clade)	uncultured bacterium 413004-H17	uncultured bacterium 413004-H17	uncultured bacterium 413004-H17	uncultured bacterium 413004-H17	uncultured bacterium 413004-H17	0	2	50	23	66	233	0	0	5	0	0	1	0	0	59	44	90	273	0	0	0	0	11	0
OTU_2522	Bacteria	Marinimicrobia (SAR406 clade)	Unclassified	Unclassified	Unclassified	Unclassified	Unclassified	0	0	0	0	0	0	0	0	0	0	0	0	0	0	1	0	1	0	0	0	0	0	0	0
OTU_2524	Bacteria	Bacteroidetes	Bacteroidia	Flavobacteriales	Flavobacteriaceae	Unclassified	Unclassified	0	0	0	0	0	5	0	0	0	0	0	0	0	0	0	0	0	0	0	0	0	0	0	0
OTU_2525	Bacteria	Margulisbacteria	Unclassified	Unclassified	Unclassified	Unclassified	Unclassified	0	0	0	0	0	1	0	0	0	0	0	0	0	1	0	0	0	0	0	0	0	0	0	0
OTU_2528	Bacteria	Bacteroidetes	Bacteroidia	Chitinophagales	Unclassified	Unclassified	Unclassified	0	0	0	0	0	0	0	2	2	0	0	0	0	0	0	0	0	0	0	2	0	0	0	0
OTU_2529	Bacteria	Proteobacteria	Alphaproteobacteria	Sneathiellales	Sneathiellaceae	AT-s3-44	uncultured bacterium	0	0	0	0	0	1	0	0	0	0	0	0	0	0	1	0	0	0	0	0	0	0	0	0
OTU_253	Bacteria	Proteobacteria	Gammaproteobacteria	Oceanospirillales	Saccharospirillaceae	Oleispira	Unclassified	0	14	3	0	0	0	0	67	1	0	0	0	0	0	0	0	0	0	0	1	0	0	0	0
OTU_2532	Bacteria	Proteobacteria	Gammaproteobacteria	SAR86 clade	uncultured bacterium	uncultured bacterium	uncultured bacterium	0	0	0	0	3	5	0	0	0	0	0	0	0	0	0	1	0	3	0	0	0	0	0	0
OTU_2534	Bacteria	Proteobacteria	Deltaproteobacteria	Unclassified	Unclassified	Unclassified	Unclassified	0	4	0	0	0	0	0	0	0	0	0	0	0	0	0	0	0	0	0	0	0	0	0	0
OTU_2535	Bacteria	Proteobacteria	Alphaproteobacteria	Rhodobacterales	Rhodobacteraceae	Unclassified	Unclassified	1	0	1	0	1	0	0	0	1	0	0	0	0	0	0	0	1	0	0	0	0	0	0	1
OTU_2537	Bacteria	Acidobacteria	Subgroup 6	uncultured bacterium AD106-G4	uncultured bacterium AD106-G4	uncultured bacterium AD106-G4	uncultured bacterium AD106-G4	0	0	0	1	3	0	0	0	0	0	0	0	0	0	1	7	1	0	0	0	0	0	0	0
OTU_2538	Bacteria	Planctomycetes	Unclassified	Unclassified	Unclassified	Unclassified	Unclassified	0	0	0	0	0	0	0	0	0	0	0	0	0	0	0	0	0	0	0	0	0	0	0	6
OTU_2539	Bacteria	Margulisbacteria	uncultured bacterium	uncultured bacterium	uncultured bacterium	uncultured bacterium	uncultured bacterium	3	0	0	0	0	0	0	0	0	0	0	0	0	0	0	0	0	0	0	0	0	0	0	0
OTU_254	Bacteria	Proteobacteria	Alphaproteobacteria	SAR11 clade	uncultured	uncultured bacterium	uncultured bacterium	2	204	78	3	2	2	0	11	23	0	0	0	2	84	65	4	3	0	0	14	27	1	2	0
OTU_2540	Bacteria	Bacteroidetes	Bacteroidia	Flavobacteriales	NS7 marine group	uncultured bacterium	uncultured bacterium	3	0	0	0	0	1	0	0	0	0	0	0	1	0	0	0	0	0	3	0	0	2	2	0
OTU_2541	Bacteria	Margulisbacteria	Unclassified	Unclassified	Unclassified	Unclassified	Unclassified	0	0	0	0	0	0	0	0	0	0	0	0	0	0	0	0	0	2	0	0	0	6	0	0
OTU_2542	Bacteria	Proteobacteria	Deltaproteobacteria	Myxococcales	Eel-36e1D6	Unclassified	Unclassified	0	0	0	0	0	0	0	0	0	0	0	0	0	0	0	0	0	1	0	0	0	2	0	0
OTU_2543	Bacteria	Marinimicrobia (SAR406 clade)	uncultured bacterium	uncultured bacterium	uncultured bacterium	uncultured bacterium	uncultured bacterium	6	1	0	0	0	0	0	0	0	0	0	0	0	0	0	0	0	0	0	0	0	2	1	0
OTU_2544	Bacteria	Proteobacteria	Deltaproteobacteria	SAR324 clade(Marine group B)	Unclassified	Unclassified	Unclassified	0	3	0	0	0	0	0	0	0	0	0	0	0	0	0	0	0	0	0	0	0	0	0	0
OTU_2545	Bacteria	Marinimicrobia (SAR406 clade)	Unclassified	Unclassified	Unclassified	Unclassified	Unclassified	5	0	0	0	0	0	0	0	0	0	0	0	0	0	0	0	0	0	0	0	0	0	1	0
OTU_2547	Bacteria	Chloroflexi	Dehalococcoidia	SAR202 clade	Unclassified	Unclassified	Unclassified	0	3	3	0	0	0	0	0	0	0	0	0	0	4	0	0	0	0	0	0	1	0	0	0
OTU_2548	Bacteria	Proteobacteria	Alphaproteobacteria	Rhodospirillales	AEGEAN-169 marine group	uncultured bacterium	uncultured bacterium	0	7	1	0	0	2	0	0	0	0	0	0	0	0	1	0	0	0	0	0	0	0	0	0
OTU_2549	Bacteria	Proteobacteria	Alphaproteobacteria	Rhodospirillales	Thalassospiraceae	Thalassospira	uncultured Rhodospirillales bacterium	0	0	0	0	0	0	0	0	0	0	0	0	0	0	0	0	2	0	0	0	0	1	0	0
OTU_255	Bacteria	Bacteroidetes	Bacteroidia	Flavobacteriales	Flavobacteriaceae	Joostella	Joostella marina DSM 19592	0	0	0	32	0	0	0	0	0	0	0	0	0	0	0	0	0	0	0	0	0	0	0	0
OTU_2550	Bacteria	Proteobacteria	Gammaproteobacteria	Alteromonadales	Alteromonadaceae	Alteromonas	Alteromonas australica	0	0	0	1	0	0	0	0	0	0	0	0	0	1	0	0	1	0	0	0	0	0	1	0
OTU_2552	Bacteria	Bacteroidetes	Bacteroidia	Flavobacteriales	Flavobacteriaceae	Mesonia	uncultured bacterium	0	0	0	10	0	0	0	0	0	0	0	0	0	0	0	1	1	1	0	0	0	0	0	0
OTU_2554	Bacteria	Proteobacteria	Deltaproteobacteria	PB19	uncultured delta proteobacterium	uncultured delta proteobacterium	uncultured delta proteobacterium	0	0	0	0	0	0	0	0	0	0	0	0	0	0	0	0	0	0	8	0	0	0	1	0
OTU_2556	Bacteria	Proteobacteria	Deltaproteobacteria	PB19	Unclassified	Unclassified	Unclassified	0	0	0	0	0	0	0	0	0	0	0	0	0	1	0	0	0	0	5	0	0	0	0	0
OTU_2557	Bacteria	Proteobacteria	Deltaproteobacteria	Myxococcales	Unclassified	Unclassified	Unclassified	0	0	0	0	0	0	0	0	0	0	0	0	0	0	0	3	1	1	0	0	0	0	0	0
OTU_2558	Bacteria	Proteobacteria	Deltaproteobacteria	NB1-j	uncultured bacterium	uncultured bacterium	uncultured bacterium	0	0	0	0	1	4	0	0	2	2	0	11	0	0	1	0	0	2	0	0	1	1	16	0
OTU_2559	Bacteria	Acidobacteria	Subgroup 22	uncultured bacterium	uncultured bacterium	uncultured bacterium	uncultured bacterium	0	0	0	0	0	0	0	0	0	0	0	1	0	0	0	0	0	12	0	0	0	0	4	0
OTU_2560	Bacteria	Marinimicrobia (SAR406 clade)	uncultured bacterium	uncultured bacterium	uncultured bacterium	uncultured bacterium	uncultured bacterium	0	1	2	0	0	1	0	0	0	0	0	0	0	1	0	0	1	3	0	2	0	0	0	0
OTU_2563	Bacteria	Proteobacteria	Deltaproteobacteria	Oligoflexales	053A03-B-DI-P58	uncultured delta proteobacterium	uncultured delta proteobacterium	0	0	0	0	0	0	0	0	0	0	0	0	0	0	0	0	0	2	0	0	0	0	0	0
OTU_2565	Bacteria	Bacteroidetes	Bacteroidia	Flavobacteriales	Crocinitomicaceae	Crocinitomix	uncultured marine microorganism	0	0	0	0	0	0	0	0	0	0	0	0	2	0	0	0	0	0	3	0	0	0	0	0
OTU_2567	Bacteria	Proteobacteria	Deltaproteobacteria	Oligoflexales	Oligoflexaceae	uncultured	marine metagenome	4	0	0	0	0	0	0	0	0	0	0	0	0	0	0	0	0	0	0	0	0	0	0	0
OTU_2569	Bacteria	Proteobacteria	Deltaproteobacteria	Oligoflexales	Oligoflexaceae	uncultured	uncultured marine bacterium	0	1	0	0	0	0	0	0	0	0	0	0	0	0	0	0	1	3	0	0	0	0	0	0
OTU_257	Bacteria	Planctomycetes	Planctomycetacia	Pirellulales	Pirellulaceae	Blastopirellula	uncultured Pirellula clone 5H12	0	10	0	0	1	4	2	14	3	0	0	0	7	0	0	2	1	0	24	8	0	0	2	0
OTU_2571	Bacteria	Proteobacteria	Alphaproteobacteria	Rhodobacterales	Rhodobacteraceae	Pseudooceanicola	uncultured alpha proteobacterium	5	0	0	0	51	0	0	0	0	0	5	1	0	0	0	0	0	0	3	0	7	0	6	0
OTU_2574	Bacteria	Chloroflexi	Dehalococcoidia	SAR202 clade	uncultured bacterium	uncultured bacterium	uncultured bacterium	0	0	0	0	2	1	0	0	0	0	0	0	0	0	0	0	0	0	0	0	0	0	0	0
OTU_2575	Bacteria	Proteobacteria	Alphaproteobacteria	Sphingomonadales	Sphingomonadaceae	Novosphingobium	Unclassified	0	0	0	0	1	0	0	0	0	0	0	0	0	0	0	1	0	0	0	0	0	0	0	1
OTU_2576	Bacteria	Proteobacteria	Gammaproteobacteria	Oceanospirillales	Halomonadaceae	Halomonas	Unclassified	2	7	3	16	4	0	2	0	2	0	1	1	0	1	3	0	4	0	0	2	32	3	3	1
OTU_2577	Bacteria	Chloroflexi	Anaerolineae	Anaerolineales	Anaerolineaceae	uncultured	Unclassified	0	0	3	0	0	0	0	0	0	0	0	0	0	0	0	0	0	0	0	0	0	0	0	0
OTU_2578	Bacteria	Chloroflexi	Anaerolineae	Anaerolineales	Anaerolineaceae	uncultured	Unclassified	0	2	1	0	0	0	0	0	0	0	0	0	0	0	0	0	0	0	0	0	0	0	0	0
OTU_2579	Bacteria	Proteobacteria	Alphaproteobacteria	Rhodobacterales	Rhodobacteraceae	Unclassified	Unclassified	0	0	0	0	2	0	0	0	0	0	0	0	0	0	0	0	0	0	0	0	0	0	0	0
OTU_258	Bacteria	Proteobacteria	Alphaproteobacteria	Alphaproteobacteria Incertae Sedis	Unknown Family	Acuticoccus	uncultured Rhizobiales bacterium	0	0	0	0	0	0	0	0	0	0	0	0	0	0	0	0	0	0	0	26	0	0	0	0
OTU_2580	Bacteria	Proteobacteria	Alphaproteobacteria	Rickettsiales	AB1	uncultured bacterium	uncultured bacterium	0	0	0	0	1	0	0	0	0	0	0	0	0	0	0	1	0	0	0	0	0	0	0	0
OTU_2581	Bacteria	Bacteroidetes	Bacteroidia	Flavobacteriales	Flavobacteriaceae	Flavicella	uncultured bacterium	0	1	1	0	0	0	0	0	0	0	0	0	0	0	0	0	0	0	0	0	0	0	0	0
OTU_2583	Bacteria	Bacteroidetes	Bacteroidia	Flavobacteriales	Flavobacteriaceae	NS2b marine group	uncultured bacterium	0	1	0	0	0	0	0	0	0	0	0	0	0	0	0	0	0	0	1	0	0	0	0	0
OTU_2584	Bacteria	Proteobacteria	Gammaproteobacteria	SAR86 clade	uncultured marine bacterium 311	uncultured marine bacterium 311	uncultured marine bacterium 311	0	12	0	0	0	0	0	0	0	0	0	0	0	4	0	0	0	0	0	3	0	0	0	0
OTU_2585	Bacteria	Gemmatimonadetes	BD2-11 terrestrial group	uncultured bacterium	uncultured bacterium	uncultured bacterium	uncultured bacterium	0	0	1	0	0	0	0	0	0	0	0	0	0	0	0	2	0	0	0	0	0	0	0	0
OTU_2586	Bacteria	Acidobacteria	Subgroup 9	uncultured hydrocarbon seep bacterium BPC066	uncultured hydrocarbon seep bacterium BPC066	uncultured hydrocarbon seep bacterium BPC066	uncultured hydrocarbon seep bacterium BPC066	0	2	0	0	0	0	0	0	0	0	0	0	0	0	0	0	0	0	0	0	0	0	0	0
OTU_2588	Bacteria	Planctomycetes	Planctomycetacia	uncultured	uncultured Planctomycetales bacterium	uncultured Planctomycetales bacterium	uncultured Planctomycetales bacterium	0	0	0	0	1	2	0	0	0	0	0	1	0	0	0	0	0	0	0	0	0	0	0	0
OTU_2589	Bacteria	Spirochaetes	Spirochaetia	Spirochaetales	Spirochaetaceae	Spirochaeta 2	uncultured bacterium	0	2	0	0	0	0	0	0	0	0	0	0	0	0	0	0	0	0	0	0	0	0	0	0
OTU_259	Bacteria	Proteobacteria	Gammaproteobacteria	Oceanospirillales	Pseudohongiellaceae	Pseudohongiella	uncultured marine microorganism	0	17	23	1	0	2	0	0	3	0	0	0	0	5	25	1	0	0	0	0	0	0	0	0
OTU_2590	Bacteria	Bacteroidetes	Bacteroidia	Flavobacteriales	Crocinitomicaceae	Unclassified	Unclassified	0	1	0	0	1	0	0	0	0	0	0	0	0	0	0	0	0	0	0	0	0	0	0	0
OTU_2592	Bacteria	Proteobacteria	Alphaproteobacteria	Sphingomonadales	Sphingomonadaceae	Unclassified	Unclassified	0	0	0	1	0	0	0	0	0	0	0	1	0	0	0	0	0	0	0	0	0	0	0	0
OTU_2593	Bacteria	Marinimicrobia (SAR406 clade)	uncultured marine microorganism	uncultured marine microorganism	uncultured marine microorganism	uncultured marine microorganism	uncultured marine microorganism	0	0	3	0	0	0	0	0	0	0	0	0	0	0	0	0	0	0	0	0	0	0	0	0
OTU_2594	Bacteria	Proteobacteria	Gammaproteobacteria	HOC36	marine metagenome	marine metagenome	marine metagenome	0	32	1	0	0	0	0	0	0	0	0	0	1	8	0	0	0	0	0	0	0	0	0	0
OTU_2598	Bacteria	Proteobacteria	Deltaproteobacteria	SAR324 clade(Marine group B)	Unclassified	Unclassified	Unclassified	0	2	0	0	0	0	0	0	0	0	0	0	0	0	0	0	0	0	0	0	0	0	0	0
OTU_2599	Bacteria	Marinimicrobia (SAR406 clade)	Marinimicrobia bacterium SCGC AAA003-E22	Marinimicrobia bacterium SCGC AAA003-E22	Marinimicrobia bacterium SCGC AAA003-E22	Marinimicrobia bacterium SCGC AAA003-E22	Marinimicrobia bacterium SCGC AAA003-E22	0	2	0	0	0	0	0	0	0	0	0	0	0	0	1	0	0	0	0	0	0	0	0	0
OTU_26	Bacteria	Proteobacteria	Alphaproteobacteria	SAR11 clade	Unclassified	Unclassified	Unclassified	1	127	144	18	65	126	0	7	132	8	12	1	0	67	200	56	44	74	0	14	76	36	43	2
OTU_260	Bacteria	Planctomycetes	Planctomycetacia	Pirellulales	Pirellulaceae	Rhodopirellula	uncultured bacterium	0	1	0	13	4	1	0	0	8	9	1	2	0	0	4	23	4	0	0	0	8	15	1	0
OTU_2601	Bacteria	Proteobacteria	Gammaproteobacteria	Oceanospirillales	Halomonadaceae	Halomonas	Unclassified	0	1	1	0	1	0	0	0	2	0	0	0	0	0	0	0	0	0	0	0	0	0	0	0
OTU_2602	Bacteria	Proteobacteria	Alphaproteobacteria	Sphingomonadales	Sphingomonadaceae	Sphingobium	Unclassified	0	0	0	7	0	7	0	0	0	0	0	0	0	0	0	0	0	0	0	0	0	0	0	0
OTU_2604	Bacteria	Proteobacteria	Gammaproteobacteria	Oceanospirillales	Pseudohongiellaceae	Pseudohongiella	Unclassified	0	3	0	0	0	0	0	0	0	0	0	0	0	1	0	0	0	0	0	0	0	0	0	0
OTU_2605	Bacteria	Marinimicrobia (SAR406 clade)	uncultured Candidatus Marinimicrobia bacterium	uncultured Candidatus Marinimicrobia bacterium	uncultured Candidatus Marinimicrobia bacterium	uncultured Candidatus Marinimicrobia bacterium	uncultured Candidatus Marinimicrobia bacterium	0	3	3	0	0	0	0	0	0	0	0	0	0	4	4	0	0	0	0	0	0	0	0	0
OTU_2606	Bacteria	Marinimicrobia (SAR406 clade)	Marinimicrobia bacterium SCGC AAA003-E22	Marinimicrobia bacterium SCGC AAA003-E22	Marinimicrobia bacterium SCGC AAA003-E22	Marinimicrobia bacterium SCGC AAA003-E22	Marinimicrobia bacterium SCGC AAA003-E22	0	2	0	0	0	0	0	0	0	0	0	0	0	0	0	0	0	0	0	0	0	0	0	0
OTU_2607	Bacteria	Marinimicrobia (SAR406 clade)	uncultured bacterium	uncultured bacterium	uncultured bacterium	uncultured bacterium	uncultured bacterium	0	4	0	0	0	0	0	0	0	0	0	0	0	2	0	0	0	0	0	0	0	0	0	0
OTU_2608	Bacteria	Marinimicrobia (SAR406 clade)	Unclassified	Unclassified	Unclassified	Unclassified	Unclassified	2	2	0	0	0	0	0	0	0	0	0	0	0	0	0	0	0	0	0	0	0	0	3	0
OTU_2609	Bacteria	Bacteroidetes	Bacteroidia	Flavobacteriales	Cryomorphaceae	uncultured	uncultured Owenweeksia sp.	0	0	5	0	0	0	0	0	1	0	0	0	0	1	4	0	0	0	0	0	0	0	0	0
OTU_261	Bacteria	Proteobacteria	Alphaproteobacteria	Rhodobacterales	Rhodobacteraceae	Albimonas	Albimonas pacifica	0	0	2	8	3	0	0	0	19	1	0	0	0	0	1	2	6	4	4	15	19	54	6	0
OTU_2611	Bacteria	Proteobacteria	Alphaproteobacteria	Unclassified	Unclassified	Unclassified	Unclassified	0	0	0	0	0	0	0	0	7	0	0	0	0	0	0	0	0	0	0	0	0	0	0	0
OTU_2614	Bacteria	Proteobacteria	Deltaproteobacteria	Bdellovibrionales	Bacteriovoracaceae	Peredibacter	Unclassified	0	0	0	0	0	0	0	0	2	0	0	0	0	0	0	0	0	0	0	0	0	0	0	0
OTU_2615	Bacteria	Planctomycetes	Planctomycetacia	Planctomycetales	Rubinisphaeraceae	uncultured	Unclassified	0	0	0	0	0	0	0	1	0	0	0	0	0	0	0	0	0	0	0	1	0	0	0	0
OTU_2616	Bacteria	Proteobacteria	Deltaproteobacteria	NB1-j	uncultured bacterium	uncultured bacterium	uncultured bacterium	0	3	0	0	0	0	0	37	0	0	0	0	0	0	0	0	0	0	13	45	0	0	0	0
OTU_2617	Bacteria	Proteobacteria	Gammaproteobacteria	Cellvibrionales	Spongiibacteraceae	Sinobacterium	Gammaproteobacteria sp. Y81	0	1	0	0	0	0	0	3	0	0	0	0	0	0	0	0	0	0	0	0	0	0	0	0
OTU_262	Bacteria	Proteobacteria	Gammaproteobacteria	Alteromonadales	Marinobacteraceae	Marinobacter	uncultured Marinobacter sp.	0	2	1	1	2	0	0	3	25	1	0	1	0	0	0	0	0	0	14	3	19	0	1	0
OTU_2621	Bacteria	Planctomycetes	Phycisphaerae	MSBL9	SM23-30	uncultured bacterium	uncultured bacterium	0	0	2	0	0	0	0	0	0	0	0	0	0	0	1	0	0	0	0	0	0	0	0	0
OTU_2622	Bacteria	Planctomycetes	Planctomycetacia	Pirellulales	Pirellulaceae	Rhodopirellula	uncultured planctomycete	0	2	1	0	0	0	0	0	0	0	0	0	0	0	2	0	0	0	0	0	0	0	0	0
OTU_2623	Bacteria	Chloroflexi	Dehalococcoidia	SAR202 clade	uncultured Chloroflexus sp.	uncultured Chloroflexus sp.	uncultured Chloroflexus sp.	0	0	0	0	0	1	0	0	0	0	0	0	0	0	0	0	0	2	0	0	0	0	0	0
OTU_2626	Bacteria	Proteobacteria	Alphaproteobacteria	SAR11 clade	Clade II	uncultured bacterium	uncultured bacterium	0	30	19	3	2	8	0	0	23	1	0	0	0	11	27	1	2	10	0	13	5	8	6	0
OTU_2627	Bacteria	Marinimicrobia (SAR406 clade)	Marinimicrobia bacterium SCGC AAA003-L08	Marinimicrobia bacterium SCGC AAA003-L08	Marinimicrobia bacterium SCGC AAA003-L08	Marinimicrobia bacterium SCGC AAA003-L08	Marinimicrobia bacterium SCGC AAA003-L08	0	0	1	0	0	0	0	0	0	0	0	0	0	0	2	0	0	0	0	0	0	0	0	0
OTU_2628	Bacteria	Actinobacteria	Actinobacteria	Corynebacteriales	Mycobacteriaceae	Mycobacterium	uncultured bacterium	0	0	0	0	0	0	0	0	1	0	0	0	0	0	0	0	0	0	0	0	2	0	0	0
OTU_263	Bacteria	Acidobacteria	Thermoanaerobaculia	Thermoanaerobaculales	Thermoanaerobaculaceae	Subgroup 10	uncultured Acidobacteria bacterium	0	4	15	4	3	5	0	0	0	1	0	0	0	2	13	29	8	6	0	1	2	0	0	0
OTU_2630	Bacteria	Nitrospinae	Nitrospinia	Nitrospinales	Nitrospinaceae	uncultured	uncultured bacterium	1	6	0	0	0	0	0	0	0	0	0	0	0	1	0	0	0	0	0	0	0	0	0	0
OTU_2631	Bacteria	Marinimicrobia (SAR406 clade)	marine metagenome	marine metagenome	marine metagenome	marine metagenome	marine metagenome	0	3	0	0	0	0	0	0	0	0	0	0	0	1	0	0	0	0	0	0	0	0	0	0
OTU_2637	Bacteria	Proteobacteria	Gammaproteobacteria	Alteromonadales	Pseudoalteromonadaceae	Pseudoalteromonas	Unclassified	0	0	0	0	0	0	1	1	0	0	0	0	0	0	0	0	0	0	0	0	0	0	0	0
OTU_2638	Bacteria	Proteobacteria	Deltaproteobacteria	Bdellovibrionales	Bdellovibrionaceae	OM27 clade	uncultured bacterium	0	0	0	0	0	0	0	2	1	0	0	0	0	0	0	0	0	0	0	0	0	0	0	0
OTU_2639	Bacteria	Proteobacteria	Deltaproteobacteria	Myxococcales	bacteriap25	Unclassified	Unclassified	0	0	0	0	0	0	0	2	0	0	0	0	0	0	0	0	0	0	0	0	0	0	0	0
OTU_264	Bacteria	Planctomycetes	Planctomycetacia	Pirellulales	Pirellulaceae	uncultured	uncultured marine microorganism	0	53	23	3	8	17	0	1	3	0	0	0	0	14	18	9	2	1	0	0	0	0	0	0
OTU_2640	Bacteria	Proteobacteria	Deltaproteobacteria	Unclassified	Unclassified	Unclassified	Unclassified	0	0	0	0	0	0	0	2	0	0	0	0	0	0	0	0	0	0	0	3	0	0	0	0
OTU_2643	Bacteria	Proteobacteria	Deltaproteobacteria	Desulfarculales	Desulfarculaceae	uncultured	uncultured delta proteobacterium	0	0	0	0	0	0	0	4	0	0	0	0	0	0	0	0	0	0	0	0	0	0	0	0
OTU_2644	Bacteria	Marinimicrobia (SAR406 clade)	uncultured bacterium	uncultured bacterium	uncultured bacterium	uncultured bacterium	uncultured bacterium	0	1	1	0	0	0	0	0	0	0	0	0	0	0	0	0	0	0	0	0	0	0	0	0
OTU_2646	Bacteria	Proteobacteria	Alphaproteobacteria	Rhizobiales	Rhizobiaceae	Unclassified	Unclassified	0	0	0	0	0	0	0	0	0	0	0	0	0	0	0	0	0	0	0	0	0	0	0	3
OTU_2647	Bacteria	Proteobacteria	Deltaproteobacteria	Bradymonadales	uncultured delta proteobacterium	uncultured delta proteobacterium	uncultured delta proteobacterium	0	0	2	0	0	0	0	0	0	0	0	0	0	0	0	0	0	0	0	0	2	0	0	0
OTU_265	Bacteria	Actinobacteria	Acidimicrobiia	Microtrichales	Microtrichaceae	IMCC26207	uncultured bacterium	0	0	1	1	0	1	1	9	0	0	0	0	0	0	0	5	1	0	19	7	0	0	3	0
OTU_2650	Bacteria	Proteobacteria	Alphaproteobacteria	Sphingomonadales	Sphingomonadaceae	Sphingomonas	Sphingomonas paucimobilis	0	0	0	0	0	0	0	1	0	0	0	0	0	0	0	0	0	0	0	0	1	0	0	0
OTU_2651	Bacteria	Proteobacteria	Gammaproteobacteria	SAR86 clade	marine metagenome	marine metagenome	marine metagenome	11	0	1	0	0	0	0	0	0	0	0	1	0	0	0	0	0	0	0	0	0	0	0	0
OTU_2652	Bacteria	Marinimicrobia (SAR406 clade)	Unclassified	Unclassified	Unclassified	Unclassified	Unclassified	9	0	0	0	0	1	0	3	0	0	0	0	1	1	0	0	0	0	0	0	0	0	1	0
OTU_2653	Bacteria	Proteobacteria	Deltaproteobacteria	SAR324 clade(Marine group B)	uncultured deep-sea bacterium	uncultured deep-sea bacterium	uncultured deep-sea bacterium	0	1	0	0	0	0	0	0	0	0	0	0	0	0	1	0	0	0	0	0	2	0	0	0
OTU_2654	Bacteria	Proteobacteria	Alphaproteobacteria	uncultured	Unclassified	Unclassified	Unclassified	0	1	1	0	0	1	0	0	0	0	0	0	0	0	5	0	1	2	0	2	0	0	0	0
OTU_2655	Bacteria	Bacteroidetes	Bacteroidia	Bacteroidales	Prolixibacteraceae	Sunxiuqinia	Sunxiuqinia elliptica	0	0	0	0	0	0	0	0	0	0	0	0	0	0	0	0	0	0	0	0	5	0	0	0
OTU_2656	Bacteria	Bacteroidetes	Bacteroidia	Flavobacteriales	Weeksellaceae	Chryseobacterium	Chryseobacterium sp. JIP 13/00 (2)	0	0	0	0	0	0	0	0	0	0	0	0	0	0	0	0	0	0	0	0	6	0	0	0
OTU_2657	Bacteria	Proteobacteria	Deltaproteobacteria	PB19	uncultured bacterium	uncultured bacterium	uncultured bacterium	0	0	0	0	0	0	0	0	0	0	0	0	0	0	0	0	0	0	0	0	9	0	0	0
OTU_2659	Bacteria	Firmicutes	Bacilli	Bacillales	Planococcaceae	Jeotgalibacillus	Bacillus sp. WRB-4	0	0	0	0	0	0	0	0	0	0	0	0	0	0	0	0	0	0	0	2	4	0	0	0
OTU_266	Bacteria	Actinobacteria	Acidimicrobiia	Actinomarinales	Actinomarinaceae	Candidatus Actinomarina	uncultured bacterium	2046	1	11	1	7	5	214	0	7	0	0	8	470	12	3	3	0	0	42	0	0	0	3	0
OTU_2660	Bacteria	Bacteroidetes	Bacteroidia	Chitinophagales	Saprospiraceae	uncultured	uncultured Cytophaga sp.	0	0	0	0	0	0	0	0	0	0	0	0	0	0	0	0	2	0	0	0	0	0	0	0
OTU_2664	Bacteria	Cyanobacteria	Oxyphotobacteria	Synechococcales	Cyanobiaceae	Prochlorococcus MIT9313	Unclassified	0	0	0	0	0	0	0	0	0	0	0	0	0	0	0	0	0	0	0	0	1	0	1	0
OTU_2666	Bacteria	Proteobacteria	Alphaproteobacteria	Rhodospirillales	Magnetospiraceae	uncultured	uncultured bacterium AD12-C5	0	0	0	0	0	4	0	0	0	0	0	0	0	0	0	0	1	5	0	0	0	0	1	0
OTU_2667	Bacteria	Bacteroidetes	Bacteroidia	Flavobacteriales	Flavobacteriaceae	Tenacibaculum	Tenacibaculum sp. MEBiC06102T	0	0	0	0	0	0	0	0	0	0	0	0	0	0	0	0	0	1	0	0	2	0	2	0
OTU_2668	Bacteria	Proteobacteria	Deltaproteobacteria	Bdellovibrionales	Bdellovibrionaceae	OM27 clade	Unclassified	0	0	0	0	0	0	0	0	2	0	0	0	0	0	0	0	0	0	0	0	0	0	0	0
OTU_2669	Bacteria	Proteobacteria	Alphaproteobacteria	Rickettsiales	AB1	Sinorickettsia chlamys	Sinorickettsia chlamys	0	0	0	0	1	1	0	0	0	1	0	0	0	0	1	3	4	0	0	0	0	0	0	0
OTU_267	Bacteria	Planctomycetes	Planctomycetacia	Pirellulales	Pirellulaceae	Rhodopirellula	uncultured bacterium	0	1	20	0	2	0	0	13	38	0	0	0	0	4	19	0	0	0	0	26	30	0	0	0
OTU_2670	Bacteria	Proteobacteria	Deltaproteobacteria	NB1-j	uncultured bacterium	uncultured bacterium	uncultured bacterium	0	0	0	0	0	1	0	0	0	0	0	1	0	0	0	0	0	0	0	0	0	0	2	0
OTU_2673	Bacteria	Cyanobacteria	Oxyphotobacteria	Synechococcales	Cyanobiaceae	Prochlorococcus MIT9313	uncultured Prochlorococcus sp.	5	0	1	0	0	0	0	0	1	0	0	0	5	0	0	0	0	0	0	0	0	0	5	0
OTU_2674	Bacteria	Actinobacteria	Acidimicrobiia	Microtrichales	Ilumatobacteraceae	Ilumatobacter	uncultured bacterium	0	0	0	0	1	0	0	0	0	0	0	0	0	0	0	0	0	0	0	0	0	0	2	0
OTU_2675	Bacteria	Bacteroidetes	Bacteroidia	Flavobacteriales	NS7 marine group	uncultured bacterium	uncultured bacterium	2	0	0	0	0	0	1	0	0	0	0	0	2	0	0	0	0	0	3	0	0	0	3	0
OTU_2676	Bacteria	Planctomycetes	Planctomycetacia	Planctomycetales	Rubinisphaeraceae	uncultured	uncultured Planctomycetaceae bacterium	0	0	0	0	0	0	0	0	0	0	0	0	0	0	0	1	0	0	0	0	0	0	2	0
OTU_2677	Bacteria	Patescibacteria	Parcubacteria	Unclassified	Unclassified	Unclassified	Unclassified	0	0	0	0	0	0	0	0	0	0	0	0	0	0	0	0	0	0	0	0	0	0	3	0
OTU_2678	Bacteria	Proteobacteria	Gammaproteobacteria	Steroidobacterales	Woeseiaceae	Woeseia	Unclassified	0	1	0	0	0	0	0	0	0	0	0	0	0	0	0	0	0	0	0	0	0	0	1	0
OTU_268	Bacteria	Planctomycetes	Planctomycetacia	Pirellulales	Pirellulaceae	uncultured	uncultured marine microorganism	0	0	6	7	10	9	0	0	0	0	0	1	0	0	6	21	17	6	0	0	11	0	13	0
OTU_2680	Bacteria	Proteobacteria	Alphaproteobacteria	Parvibaculales	Parvibaculaceae	Mf105b01	alpha proteobacterium Mf 1.05b.01	0	0	0	0	0	0	0	0	0	0	0	0	0	0	0	0	0	0	0	0	0	0	0	3
OTU_2681	Bacteria	Proteobacteria	Deltaproteobacteria	Bdellovibrionales	Bdellovibrionaceae	OM27 clade	Unclassified	0	0	0	0	0	1	0	0	0	1	0	0	0	1	0	0	0	1	0	0	0	0	3	0
OTU_2683	Bacteria	Planctomycetes	Phycisphaerae	Phycisphaerales	Phycisphaeraceae	uncultured	Unclassified	0	0	0	0	0	0	0	0	1	0	0	0	0	0	1	0	0	0	0	0	0	0	0	0
OTU_2684	Bacteria	Proteobacteria	Gammaproteobacteria	Betaproteobacteriales	Rhodocyclaceae	Zoogloea	uncultured beta proteobacterium	0	0	0	0	0	0	0	0	0	3	0	0	0	0	0	0	0	0	0	0	0	0	0	0
OTU_2685	Bacteria	Margulisbacteria	uncultured bacterium	uncultured bacterium	uncultured bacterium	uncultured bacterium	uncultured bacterium	0	0	0	0	0	0	0	0	2	0	0	0	0	0	0	0	0	0	0	0	0	0	0	0
OTU_2686	Bacteria	Proteobacteria	Alphaproteobacteria	Rhodobacterales	Rhodobacteraceae	Unclassified	Unclassified	0	0	0	0	1	1	0	0	0	0	0	0	0	0	0	0	0	0	1	0	0	0	0	0
OTU_2688	Bacteria	Proteobacteria	Gammaproteobacteria	Betaproteobacteriales	Hydrogenophilaceae	uncultured	uncultured bacterium	0	0	0	0	0	0	0	0	0	0	0	0	0	0	0	0	0	0	0	0	2	0	0	0
OTU_2689	Bacteria	Firmicutes	Clostridia	Clostridiales	Clostridiaceae 1	Proteiniclasticum	Clostridium sp.	0	0	0	0	0	0	0	0	0	0	0	0	0	0	0	0	0	0	0	0	2	0	0	0
OTU_269	Bacteria	Proteobacteria	Alphaproteobacteria	Puniceispirillales	SAR116 clade	uncultured bacterium	uncultured bacterium	40	13	3	0	0	1	0	11	9	0	0	1	9	8	0	0	0	1	26	9	0	0	1	0
OTU_2690	Bacteria	Proteobacteria	Gammaproteobacteria	Alteromonadales	Alteromonadaceae	Alteromonas	Unclassified	0	0	0	0	0	0	0	0	0	0	1	0	0	0	0	0	0	0	0	0	1	0	0	0
OTU_2691	Bacteria	Bacteroidetes	Bacteroidia	Flavobacteriales	Flavobacteriaceae	Actibacter	uncultured bacterium	0	0	0	0	0	0	0	0	3	0	0	0	0	0	0	0	0	0	0	0	0	0	0	0
OTU_2692	Bacteria	Proteobacteria	Deltaproteobacteria	Unclassified	Unclassified	Unclassified	Unclassified	0	0	0	0	0	0	0	0	0	0	0	0	0	0	0	0	0	0	0	0	0	0	3	0
OTU_2693	Bacteria	Unclassified	Unclassified	Unclassified	Unclassified	Unclassified	Unclassified	0	0	1	0	0	0	0	0	0	0	0	0	0	0	0	0	0	0	0	0	0	3	0	0
OTU_2694	Bacteria	Proteobacteria	Gammaproteobacteria	Gammaproteobacteria Incertae Sedis	Unknown Family	uncultured	uncultured bacterium	0	0	0	0	0	0	0	0	0	0	0	0	0	0	0	0	0	0	0	0	0	0	3	0
OTU_2696	Bacteria	Actinobacteria	Acidimicrobiia	Microtrichales	Microtrichaceae	Sva0996 marine group	uncultured bacterium	0	0	0	0	0	0	0	0	0	0	0	1	0	0	0	0	0	0	0	0	0	0	3	0
OTU_27	Bacteria	Proteobacteria	Gammaproteobacteria	Oceanospirillales	Alcanivoracaceae	Alcanivorax	uncultured bacterium	36	13	3	2	7	73	0	3	8	1	93	91	0	4	0	0	5	1	2	551	12	31	10	51
OTU_270	Bacteria	Planctomycetes	Planctomycetacia	Pirellulales	Pirellulaceae	Blastopirellula	Pirellula sp.	0	0	0	0	21	13	2	21	3	0	0	1	5	0	0	4	16	1	4	0	0	8	0	0
OTU_2700	Bacteria	Actinobacteria	Actinobacteria	Micrococcales	Micrococcaceae	Rothia	Unclassified	0	0	0	0	0	0	0	0	3	0	0	0	0	0	0	0	0	0	0	0	0	0	0	0
OTU_2703	Bacteria	Proteobacteria	Deltaproteobacteria	NB1-j	uncultured bacterium	uncultured bacterium	uncultured bacterium	0	0	0	0	0	0	0	1	6	0	0	0	0	0	0	0	0	0	0	0	3	0	0	0
OTU_2704	Bacteria	Proteobacteria	Deltaproteobacteria	Desulfuromonadales	Unclassified	Unclassified	Unclassified	0	0	0	0	0	0	0	0	0	0	0	0	0	0	0	0	0	0	0	2	2	0	0	0
OTU_2705	Bacteria	Bacteroidetes	Bacteroidia	Flavobacteriales	Flavobacteriaceae	Winogradskyella	uncultured bacterium	2	0	2	3	0	0	0	1	0	1	0	0	1	0	0	0	0	0	4	7	0	1	2	4
OTU_2706	Bacteria	Fibrobacteres	Fibrobacteria	Fibrobacterales	Fibrobacteraceae	uncultured	uncultured Fibrobacteres bacterium	0	0	0	0	0	0	0	0	0	0	0	0	0	0	0	0	0	0	3	0	0	0	0	0
OTU_2709	Bacteria	Planctomycetes	Planctomycetacia	Pirellulales	Pirellulaceae	Blastopirellula	uncultured bacterium	0	0	0	0	0	0	0	0	0	0	0	0	0	0	0	0	0	0	0	0	3	0	0	0
OTU_271	Bacteria	Proteobacteria	Alphaproteobacteria	Unclassified	Unclassified	Unclassified	Unclassified	0	0	9	0	0	0	0	0	0	0	0	0	0	0	12	0	0	0	0	0	0	0	0	0
OTU_2710	Bacteria	Bacteroidetes	Bacteroidia	Cytophagales	Spirosomaceae	Dyadobacter	uncultured bacterium	0	0	0	0	0	0	0	0	0	0	0	0	0	0	0	0	0	0	0	0	2	0	0	0
OTU_2712	Bacteria	Proteobacteria	Gammaproteobacteria	Gammaproteobacteria Incertae Sedis	Unknown Family	Unclassified	Unclassified	0	0	0	0	0	0	0	0	0	0	0	0	0	0	0	0	0	0	0	0	3	0	0	0
OTU_2713	Bacteria	Proteobacteria	Deltaproteobacteria	PB19	uncultured bacterium	uncultured bacterium	uncultured bacterium	0	2	0	0	0	0	0	0	0	0	0	0	0	0	0	0	0	0	0	0	4	0	0	0
OTU_2714	Bacteria	Bacteroidetes	Bacteroidia	Flavobacteriales	Flavobacteriaceae	Winogradskyella	Unclassified	0	0	0	0	1	0	0	0	3	0	0	0	0	0	0	0	0	0	1	4	0	0	0	0
OTU_2715	Bacteria	Firmicutes	Clostridia	Clostridiales	Family XI	Parvimonas	uncultured bacterium	0	0	0	0	0	0	0	0	0	0	0	0	0	0	0	0	0	2	0	0	0	0	0	0
OTU_2717	Bacteria	Unclassified	Unclassified	Unclassified	Unclassified	Unclassified	Unclassified	0	0	0	0	0	0	0	3	0	0	0	0	0	0	0	0	0	0	0	1	0	0	0	0
OTU_272	Bacteria	Proteobacteria	Gammaproteobacteria	Betaproteobacteriales	Burkholderiaceae	Burkholderia-Caballeronia-Paraburkholderia	uncultured organism	0	0	0	0	0	7	0	0	0	0	0	0	0	0	0	59	26	1	3	0	0	11	3	0
OTU_2720	Bacteria	Proteobacteria	Deltaproteobacteria	Desulfarculales	Desulfarculaceae	uncultured	uncultured delta proteobacterium	0	2	0	0	0	0	0	0	0	0	0	0	0	0	0	0	0	0	0	4	0	0	0	0
OTU_2721	Bacteria	Marinimicrobia (SAR406 clade)	Marinimicrobia bacterium JGI 0000113-D11	Marinimicrobia bacterium JGI 0000113-D11	Marinimicrobia bacterium JGI 0000113-D11	Marinimicrobia bacterium JGI 0000113-D11	Marinimicrobia bacterium JGI 0000113-D11	0	0	0	0	0	2	0	0	0	0	0	0	0	0	0	0	1	3	0	0	0	0	0	0
OTU_2722	Bacteria	Proteobacteria	Gammaproteobacteria	Gammaproteobacteria Incertae Sedis	Unknown Family	uncultured marine bacterium	uncultured marine bacterium	0	0	0	0	0	0	0	0	0	0	0	0	0	0	0	0	0	0	22	0	0	0	0	0
OTU_2724	Bacteria	Chloroflexi	Dehalococcoidia	SAR202 clade	Unclassified	Unclassified	Unclassified	0	1	0	0	0	0	0	0	0	0	0	0	0	2	0	0	0	0	0	0	0	0	0	0
OTU_2725	Bacteria	Marinimicrobia (SAR406 clade)	uncultured bacterium	uncultured bacterium	uncultured bacterium	uncultured bacterium	uncultured bacterium	0	6	0	0	0	0	0	0	0	0	0	0	0	6	2	0	0	0	0	0	0	0	0	0
OTU_2726	Bacteria	Proteobacteria	Alphaproteobacteria	Rhodospirillales	AEGEAN-169 marine group	uncultured bacterium	uncultured bacterium	0	2	1	0	0	0	0	0	0	0	0	0	0	3	10	0	0	3	0	0	0	0	4	0
OTU_2727	Bacteria	Acidobacteria	Acidobacteriia	Solibacterales	Solibacteraceae (Subgroup 3)	PAUC26f	uncultured bacterium AD370-D1	0	0	0	0	0	0	0	0	0	0	0	0	0	0	3	2	0	0	0	0	0	0	0	0
OTU_2728	Bacteria	Proteobacteria	Gammaproteobacteria	Arenicellales	Arenicellaceae	uncultured	Unclassified	0	1	0	0	0	0	0	0	0	0	0	0	0	2	0	0	0	0	0	0	0	0	0	0
OTU_2729	Bacteria	Marinimicrobia (SAR406 clade)	uncultured bacterium HF0500_01L02	uncultured bacterium HF0500_01L02	uncultured bacterium HF0500_01L02	uncultured bacterium HF0500_01L02	uncultured bacterium HF0500_01L02	0	0	0	0	0	0	0	0	0	0	0	0	0	5	0	0	0	0	0	0	0	0	0	0
OTU_273	Bacteria	Bacteroidetes	Bacteroidia	Flavobacteriales	Flavobacteriaceae	NS2b marine group	uncultured bacterium	0	19	10	5	7	4	5	0	0	0	0	0	10	20	23	8	11	4	3	0	0	0	1	0
OTU_2730	Bacteria	Bacteroidetes	Bacteroidia	Cytophagales	Cyclobacteriaceae	Marinoscillum	Unclassified	0	15	0	0	0	0	0	0	0	0	0	0	0	5	0	0	0	0	0	0	0	0	0	0
OTU_2731	Bacteria	Margulisbacteria	Unclassified	Unclassified	Unclassified	Unclassified	Unclassified	0	0	0	0	0	0	0	0	0	0	0	0	0	0	0	0	0	0	0	0	3	0	0	0
OTU_2732	Bacteria	Firmicutes	Clostridia	Clostridiales	Peptostreptococcaceae	uncultured	uncultured bacterium	0	0	0	0	0	0	0	0	0	0	2	0	0	0	1	0	0	0	0	0	1	0	0	0
OTU_2733	Bacteria	Proteobacteria	Gammaproteobacteria	P0X4b2H11	uncultured bacterium	uncultured bacterium	uncultured bacterium	0	0	0	0	0	1	0	0	1	0	0	0	0	0	0	0	3	0	0	0	1	2	0	0
OTU_2736	Bacteria	Proteobacteria	Alphaproteobacteria	Rhodobacterales	Rhodobacteraceae	Unclassified	Unclassified	0	0	0	0	0	0	0	0	0	0	0	0	0	0	0	0	1	0	0	1	0	1	0	0
OTU_2737	Bacteria	Proteobacteria	Gammaproteobacteria	Coxiellales	Coxiellaceae	Coxiella	Unclassified	0	0	0	0	0	0	0	0	0	0	0	0	0	0	0	0	0	0	0	2	0	0	0	0
OTU_2738	Bacteria	Bacteroidetes	Bacteroidia	Flavobacteriales	NS9 marine group	uncultured marine bacterium	uncultured marine bacterium	0	3	0	0	0	0	0	0	0	0	0	0	0	0	0	0	0	0	0	2	0	0	0	0
OTU_274	Bacteria	Bacteroidetes	Bacteroidia	Flavobacteriales	Cryomorphaceae	Luteibaculum	uncultured bacterium	0	0	0	0	0	0	0	0	0	0	0	0	0	0	0	0	0	0	24	0	0	0	0	0
OTU_2740	Bacteria	Proteobacteria	Gammaproteobacteria	Immundisolibacterales	Immundisolibacteraceae	Immundisolibacter	uncultured gamma proteobacterium	0	0	0	0	0	0	0	0	0	0	0	0	0	0	0	0	0	0	0	0	3	0	0	0
OTU_2741	Bacteria	Proteobacteria	Gammaproteobacteria	Gammaproteobacteria Incertae Sedis	Unknown Family	Unclassified	Unclassified	0	0	0	0	0	0	0	0	0	0	0	0	0	0	0	0	0	0	0	7	0	0	0	0
OTU_2744	Bacteria	Proteobacteria	Deltaproteobacteria	SAR324 clade(Marine group B)	marine metagenome	marine metagenome	marine metagenome	0	0	1	0	0	1	0	0	1	0	0	0	0	0	6	0	1	0	0	1	0	1	0	0
OTU_2747	Bacteria	Proteobacteria	Deltaproteobacteria	Bdellovibrionales	Bacteriovoracaceae	uncultured	uncultured delta proteobacterium	0	0	1	0	0	0	0	0	0	0	0	0	0	2	3	0	0	0	0	0	2	0	0	0
OTU_275	Bacteria	Bacteroidetes	Bacteroidia	Flavobacteriales	Flavobacteriaceae	NS5 marine group	hydrothermal vent metagenome	0	35	10	6	4	8	0	0	3	0	1	0	0	12	12	48	21	13	0	0	4	0	14	0
OTU_2750	Bacteria	WPS-2	hydrothermal vent metagenome	hydrothermal vent metagenome	hydrothermal vent metagenome	hydrothermal vent metagenome	hydrothermal vent metagenome	0	0	0	0	0	0	0	0	0	0	0	0	0	0	0	2	0	0	0	0	0	0	0	0
OTU_2751	Bacteria	Proteobacteria	Gammaproteobacteria	Salinisphaerales	Salinisphaeraceae	Salinisphaera	Salinisphaera shabanensis E1L3A	0	0	1	0	1	0	0	0	2	0	0	0	0	0	0	0	0	1	0	0	0	0	0	0
OTU_2753	Bacteria	Bacteroidetes	Bacteroidia	Cytophagales	Cyclobacteriaceae	Unclassified	Unclassified	0	0	1	0	0	0	0	0	0	0	0	0	0	0	0	1	0	0	0	0	0	0	0	0
OTU_2754	Bacteria	Marinimicrobia (SAR406 clade)	uncultured bacterium	uncultured bacterium	uncultured bacterium	uncultured bacterium	uncultured bacterium	1	0	9	0	1	4	0	0	0	0	0	0	0	2	12	3	2	2	0	0	0	0	0	0
OTU_2756	Bacteria	Actinobacteria	Actinobacteria	Actinomycetales	Actinomycetaceae	Actinomyces	Actinomyces sp. oral strain Hal-1065	0	0	0	0	0	0	0	0	0	0	0	0	0	0	0	0	0	0	8	0	0	0	0	0
OTU_2757	Bacteria	Bacteroidetes	Bacteroidia	Flavobacteriales	NS9 marine group	uncultured bacterium	uncultured bacterium	0	0	0	0	0	0	0	0	0	0	0	0	0	0	0	0	0	0	2	0	0	0	0	0
OTU_2758	Bacteria	Bacteroidetes	Bacteroidia	Chitinophagales	Saprospiraceae	Lewinella	Cladosiphon okamuranus	0	0	0	0	0	0	0	0	0	0	0	0	0	0	0	0	0	0	2	0	0	0	2	0
OTU_276	Bacteria	Chloroflexi	Dehalococcoidia	SAR202 clade	uncultured bacterium	uncultured bacterium	uncultured bacterium	0	0	20	0	1	0	0	0	0	0	0	0	0	0	1	0	0	0	0	0	0	0	0	0
OTU_2760	Bacteria	Proteobacteria	Gammaproteobacteria	Coxiellales	Coxiellaceae	Coxiella	uncultured Legionellales bacterium	0	0	0	0	0	0	0	0	0	0	0	0	3	0	0	0	0	0	3	0	0	0	0	0
OTU_2761	Bacteria	Proteobacteria	Alphaproteobacteria	Sphingomonadales	Sphingomonadaceae	Altererythrobacter	Unclassified	0	0	0	0	0	0	0	0	0	0	0	1	0	0	0	0	0	0	1	0	0	0	0	0
OTU_2762	Bacteria	Bacteroidetes	Bacteroidia	Chitinophagales	Unclassified	Unclassified	Unclassified	0	0	0	0	0	0	0	0	0	0	0	0	0	0	0	0	0	0	2	0	0	0	0	0
OTU_2764	Bacteria	Proteobacteria	Deltaproteobacteria	NB1-j	uncultured bacterium	uncultured bacterium	uncultured bacterium	0	3	4	0	0	0	0	3	13	0	0	0	0	1	9	0	0	0	0	23	8	2	0	0
OTU_2766	Bacteria	Proteobacteria	Alphaproteobacteria	Sphingomonadales	Sphingomonadaceae	Sphingopyxis	Unclassified	0	0	0	0	0	0	1	2	0	0	0	0	5	0	0	0	0	0	27	0	0	0	0	0
OTU_2768	Bacteria	Proteobacteria	Deltaproteobacteria	PB19	uncultured delta proteobacterium	uncultured delta proteobacterium	uncultured delta proteobacterium	0	0	0	0	0	0	0	0	0	0	0	0	0	0	0	0	0	0	4	0	0	0	0	0
OTU_2769	Bacteria	Firmicutes	Bacilli	Bacillales	Family XI	Gemella	uncultured bacterium	0	0	0	0	0	0	0	0	0	0	0	0	0	0	0	0	1	0	16	0	0	0	0	0
OTU_277	Bacteria	Bacteroidetes	Rhodothermia	Rhodothermales	Rhodothermaceae	Rubrivirga	Rhodothermaceae bacterium SAORIC-26	0	0	0	0	6	62	0	0	0	0	0	16	0	0	0	37	0	1	0	0	0	0	0	0
OTU_2773	Bacteria	Proteobacteria	Gammaproteobacteria	Oceanospirillales	Alcanivoracaceae	Alcanivorax	uncultured organism	0	0	0	0	0	0	0	0	4	0	0	0	0	0	0	0	0	0	0	0	0	0	0	0
OTU_2774	Bacteria	Bacteroidetes	Bacteroidia	Bacteroidales	Porphyromonadaceae	Porphyromonas	uncultured bacterium	0	0	0	0	0	0	0	0	0	0	0	0	0	0	0	0	0	0	5	0	0	0	0	0
OTU_2775	Bacteria	Proteobacteria	Alphaproteobacteria	Rhodospirillales	uncultured	uncultured gamma proteobacterium	uncultured gamma proteobacterium	0	0	0	0	0	2	0	0	0	0	0	0	0	0	0	0	0	0	0	0	0	0	0	0
OTU_2776	Bacteria	Margulisbacteria	Unclassified	Unclassified	Unclassified	Unclassified	Unclassified	0	3	1	0	0	0	0	0	0	0	0	0	0	2	1	0	0	0	0	0	0	0	0	0
OTU_2778	Bacteria	Verrucomicrobia	Verrucomicrobiae	Pedosphaerales	Pedosphaeraceae	uncultured bacterium	uncultured bacterium	0	0	2	0	0	0	0	0	0	0	0	0	0	0	0	0	0	0	0	0	0	0	0	0
OTU_278	Bacteria	Proteobacteria	Alphaproteobacteria	Rhodospirillales	Magnetospiraceae	uncultured	uncultured marine microorganism	0	52	48	3	4	5	0	0	14	0	0	0	0	31	71	5	3	6	0	3	0	2	1	0
OTU_2780	Bacteria	Marinimicrobia (SAR406 clade)	Unclassified	Unclassified	Unclassified	Unclassified	Unclassified	0	3	5	0	0	2	0	0	0	0	0	0	0	1	9	3	0	0	0	0	0	0	0	0
OTU_2781	Bacteria	Proteobacteria	Gammaproteobacteria	Steroidobacterales	Woeseiaceae	Woeseia	Unclassified	0	12	0	0	0	0	0	0	0	0	0	0	0	2	0	0	0	0	0	0	0	0	0	0
OTU_2782	Bacteria	Dependentiae	Babeliae	Babeliales	UBA12409	uncultured bacterium	uncultured bacterium	0	2	0	0	0	0	0	0	0	0	0	0	0	0	0	0	0	0	0	0	0	0	0	0
OTU_2783	Bacteria	Marinimicrobia (SAR406 clade)	uncultured bacterium	uncultured bacterium	uncultured bacterium	uncultured bacterium	uncultured bacterium	0	3	4	0	0	0	0	0	0	0	0	0	0	3	3	0	0	0	0	0	0	0	0	0
OTU_2784	Bacteria	Proteobacteria	Deltaproteobacteria	NB1-j	uncultured bacterium	uncultured bacterium	uncultured bacterium	0	1	0	0	0	0	0	0	0	0	0	0	0	1	0	0	0	0	0	0	0	0	0	0
OTU_2785	Bacteria	Marinimicrobia (SAR406 clade)	uncultured marine microorganism	uncultured marine microorganism	uncultured marine microorganism	uncultured marine microorganism	uncultured marine microorganism	0	1	1	0	0	0	0	0	0	0	0	0	0	0	0	0	0	0	0	0	0	0	0	0
OTU_2786	Bacteria	Marinimicrobia (SAR406 clade)	Unclassified	Unclassified	Unclassified	Unclassified	Unclassified	0	3	2	0	0	0	0	0	0	0	0	0	0	2	1	0	1	0	0	0	0	0	0	0
OTU_2787	Bacteria	PAUC34f	uncultured bacterium	uncultured bacterium	uncultured bacterium	uncultured bacterium	uncultured bacterium	0	2	1	0	0	0	0	0	0	0	0	0	0	1	0	0	0	0	0	0	0	0	0	0
OTU_2788	Bacteria	Proteobacteria	Gammaproteobacteria	Coxiellales	Coxiellaceae	Coxiella	uncultured bacterium	1	0	0	0	0	0	1	0	0	0	0	0	0	0	0	0	0	0	0	0	0	0	0	0
OTU_2789	Bacteria	Proteobacteria	Deltaproteobacteria	Bdellovibrionales	Bacteriovoracaceae	uncultured	uncultured bacterium	5	0	0	0	0	0	0	0	0	0	0	0	0	0	0	0	0	0	0	0	0	0	0	0
OTU_2790	Bacteria	Proteobacteria	Alphaproteobacteria	SAR11 clade	Clade II	marine metagenome	marine metagenome	0	0	1	0	1	0	0	0	0	0	2	0	0	0	0	0	0	1	0	0	0	0	1	0
OTU_2791	Bacteria	Proteobacteria	Alphaproteobacteria	SAR11 clade	Clade I	Clade Ib	uncultured Pelagibacterales bacterium	0	0	2	0	0	0	0	0	0	0	0	0	0	0	0	0	0	0	0	0	0	0	0	0
OTU_2792	Bacteria	Chloroflexi	Dehalococcoidia	SAR202 clade	uncultured bacterium	uncultured bacterium	uncultured bacterium	0	0	2	0	0	0	0	0	0	0	0	0	0	0	0	0	0	0	0	0	0	0	0	0
OTU_2793	Bacteria	Proteobacteria	Gammaproteobacteria	Unclassified	Unclassified	Unclassified	Unclassified	0	0	3	0	0	0	0	0	0	0	0	0	0	0	0	0	0	0	0	0	0	0	0	0
OTU_2794	Bacteria	Proteobacteria	Deltaproteobacteria	NB1-j	uncultured deep-sea bacterium	uncultured deep-sea bacterium	uncultured deep-sea bacterium	0	0	0	0	0	0	0	0	0	0	0	0	0	0	0	0	0	0	0	0	0	4	0	0
OTU_2796	Bacteria	Bacteroidetes	Bacteroidia	Cytophagales	Cyclobacteriaceae	Algoriphagus	Unclassified	0	0	0	0	0	0	0	0	0	0	0	0	0	0	0	0	0	0	0	0	2	0	0	0
OTU_2797	Bacteria	Proteobacteria	Alphaproteobacteria	Rickettsiales	Unclassified	Unclassified	Unclassified	0	0	0	0	0	0	0	0	0	0	0	0	0	0	0	0	0	0	0	0	0	2	0	0
OTU_2799	Bacteria	Bacteroidetes	Bacteroidia	Flavobacteriales	Flavobacteriaceae	NS2b marine group	Unclassified	0	0	0	0	0	0	1	0	0	0	0	0	3	0	0	0	0	0	0	0	0	1	1	0
OTU_28	Bacteria	Bacteroidetes	Bacteroidia	Chitinophagales	Chitinophagaceae	uncultured	Unclassified	0	0	0	1	166	11	0	0	0	0	1	1	0	0	13	77	217	25	0	0	3	5	3	0
OTU_280	Bacteria	Proteobacteria	Alphaproteobacteria	Sphingomonadales	Sphingomonadaceae	Novosphingobium	uncultured organism	0	0	0	0	0	2	0	0	0	0	0	1	0	0	0	0	5	1	4	0	31	11	0	0
OTU_2801	Bacteria	Planctomycetes	OM190	uncultured bacterium	uncultured bacterium	uncultured bacterium	uncultured bacterium	0	0	0	0	0	0	0	0	0	0	0	0	0	0	0	0	0	0	0	4	0	0	0	0
OTU_2802	Bacteria	Proteobacteria	Deltaproteobacteria	PB19	Unclassified	Unclassified	Unclassified	0	1	0	0	0	0	0	1	0	0	0	0	0	0	0	0	0	0	0	2	0	0	0	0
OTU_2804	Bacteria	Proteobacteria	Gammaproteobacteria	Coxiellales	Coxiellaceae	Coxiella	uncultured organism	0	0	0	0	0	0	0	0	0	0	0	0	0	0	0	0	0	0	0	0	0	3	0	0
OTU_2805	Bacteria	Proteobacteria	Deltaproteobacteria	Myxococcales	P3OB-42	uncultured bacterium	uncultured bacterium	0	0	0	0	0	0	0	0	0	0	0	0	0	1	0	0	0	1	0	3	0	0	0	0
OTU_2806	Bacteria	Chloroflexi	Dehalococcoidia	SAR202 clade	Unclassified	Unclassified	Unclassified	0	0	3	0	0	0	0	0	0	0	0	0	0	0	1	0	0	0	0	0	0	0	0	0
OTU_2808	Bacteria	Marinimicrobia (SAR406 clade)	Marinimicrobia bacterium SCGC AAA003-L08	Marinimicrobia bacterium SCGC AAA003-L08	Marinimicrobia bacterium SCGC AAA003-L08	Marinimicrobia bacterium SCGC AAA003-L08	Marinimicrobia bacterium SCGC AAA003-L08	0	0	5	0	0	0	0	0	0	0	0	0	0	0	0	0	0	0	0	0	0	0	0	0
OTU_2809	Bacteria	Gemmatimonadetes	Gemmatimonadetes	Gemmatimonadales	Gemmatimonadaceae	uncultured	uncultured Gemmatimonadetes bacterium	0	0	0	0	0	0	0	0	0	0	0	0	0	0	0	0	0	0	0	0	2	0	0	0
OTU_281	Bacteria	Proteobacteria	Gammaproteobacteria	Oceanospirillales	Pseudohongiellaceae	Pseudohongiella	Unclassified	0	0	1	0	12	25	0	0	1	4	0	0	0	0	5	2	14	18	0	0	0	2	9	0
OTU_2810	Bacteria	Proteobacteria	Gammaproteobacteria	Coxiellales	Coxiellaceae	Coxiella	uncultured bacterium	0	0	0	0	5	0	0	4	0	0	0	0	0	1	0	0	1	0	0	0	2	0	0	0
OTU_2811	Bacteria	PAUC34f	uncultured Deferribacteres bacterium	uncultured Deferribacteres bacterium	uncultured Deferribacteres bacterium	uncultured Deferribacteres bacterium	uncultured Deferribacteres bacterium	0	2	0	0	0	0	0	0	0	0	0	0	0	2	0	0	0	0	0	0	0	0	0	0
OTU_2812	Bacteria	Firmicutes	Bacilli	Bacillales	Bacillaceae	Halobacillus	Halobacillus sp. IS-Hb2	0	0	0	0	0	0	0	0	0	0	0	0	0	0	0	0	0	0	0	0	5	0	0	0
OTU_2813	Bacteria	Proteobacteria	Alphaproteobacteria	Rhizobiales	Beijerinckiaceae	Methylobacterium	Unclassified	1	0	0	0	0	0	0	0	0	0	0	0	0	0	0	0	0	0	0	0	2	0	0	0
OTU_2814	Bacteria	Proteobacteria	Deltaproteobacteria	Unclassified	Unclassified	Unclassified	Unclassified	0	0	0	0	0	0	0	0	0	0	0	0	0	0	0	0	0	0	0	0	4	0	0	0
OTU_2815	Bacteria	Proteobacteria	Deltaproteobacteria	SAR324 clade(Marine group B)	marine metagenome	marine metagenome	marine metagenome	0	0	1	0	0	0	0	1	3	0	0	0	0	2	5	0	0	0	0	0	0	0	1	0
OTU_2816	Bacteria	Planctomycetes	Phycisphaerae	Phycisphaerales	Phycisphaeraceae	uncultured	Unclassified	0	0	0	0	0	0	0	0	1	0	0	0	0	0	2	0	0	0	0	0	0	0	0	0
OTU_2817	Bacteria	Chloroflexi	Dehalococcoidia	SAR202 clade	Unclassified	Unclassified	Unclassified	0	0	0	0	0	0	0	0	2	0	0	0	0	0	2	0	0	0	0	0	0	0	0	0
OTU_2818	Bacteria	Verrucomicrobia	Verrucomicrobiae	Opitutales	Puniceicoccaceae	Pelagicoccus	uncultured sediment bacterium	0	0	1	1	0	1	0	0	0	0	0	0	0	0	4	0	0	0	0	0	0	0	0	0
OTU_2819	Bacteria	Unclassified	Unclassified	Unclassified	Unclassified	Unclassified	Unclassified	0	0	0	0	0	0	0	0	0	0	0	0	0	0	10	0	0	0	0	0	0	0	0	0
OTU_282	Bacteria	Proteobacteria	Gammaproteobacteria	Cellvibrionales	Spongiibacteraceae	Litorivivens	uncultured gamma proteobacterium HF4000_36I10	0	0	0	0	0	0	0	0	0	0	0	0	0	0	0	0	0	0	0	0	0	0	0	37
OTU_2821	Bacteria	Cyanobacteria	Oxyphotobacteria	Synechococcales	Cyanobiaceae	Synechococcus CC9902	Unclassified	10	5	0	1	3	6	54	3	5	1	1	0	244	1	0	5	4	4	225	0	1	0	6	0
OTU_2822	Bacteria	Marinimicrobia (SAR406 clade)	Marinimicrobia bacterium SCGC AAA003-L08	Marinimicrobia bacterium SCGC AAA003-L08	Marinimicrobia bacterium SCGC AAA003-L08	Marinimicrobia bacterium SCGC AAA003-L08	Marinimicrobia bacterium SCGC AAA003-L08	0	0	0	0	0	0	0	0	0	0	0	0	0	5	0	0	0	0	0	0	0	0	0	0
OTU_2825	Bacteria	Proteobacteria	Gammaproteobacteria	SAR86 clade	Unclassified	Unclassified	Unclassified	0	4	0	0	0	0	0	0	0	0	0	0	0	1	0	0	0	0	0	0	0	0	0	0
OTU_2827	Bacteria	Planctomycetes	Phycisphaerae	MSBL9	SM23-30	uncultured bacterium	uncultured bacterium	0	0	0	0	0	4	0	0	0	0	0	2	0	0	0	0	0	0	0	0	0	0	0	0
OTU_2828	Bacteria	Acidobacteria	Acidobacteriia	Solibacterales	Solibacteraceae (Subgroup 3)	PAUC26f	uncultured bacterium	0	0	0	0	0	0	0	0	0	0	0	0	0	0	5	0	0	0	0	0	0	0	0	0
OTU_2829	Bacteria	Proteobacteria	Gammaproteobacteria	UBA10353 marine group	uncultured gamma proteobacterium HF0200_24F15	uncultured gamma proteobacterium HF0200_24F15	uncultured gamma proteobacterium HF0200_24F15	0	2	0	0	0	0	0	0	0	0	0	0	0	1	1	0	0	0	0	0	0	0	0	0
OTU_2830	Bacteria	Verrucomicrobia	Verrucomicrobiae	Opitutales	Puniceicoccaceae	MB11C04 marine group	uncultured marine microorganism	0	3	1	0	0	0	0	0	0	0	0	0	0	3	0	0	0	0	0	0	0	0	0	0
OTU_2831	Bacteria	Chloroflexi	Dehalococcoidia	SAR202 clade	Unclassified	Unclassified	Unclassified	0	2	0	0	0	0	0	0	0	0	0	0	0	3	0	0	0	0	0	0	0	0	0	0
OTU_2832	Bacteria	Verrucomicrobia	Verrucomicrobiae	Opitutales	Puniceicoccaceae	MB11C04 marine group	uncultured marine microorganism	0	2	3	0	0	0	0	0	0	0	0	0	0	3	3	0	0	0	0	0	0	0	0	0
OTU_2833	Bacteria	Acidobacteria	Subgroup 26	uncultured bacterium SAT52-B4	uncultured bacterium SAT52-B4	uncultured bacterium SAT52-B4	uncultured bacterium SAT52-B4	0	0	0	0	0	0	0	0	0	0	0	0	0	1	1	0	0	0	0	0	0	0	0	0
OTU_2835	Bacteria	Proteobacteria	Alphaproteobacteria	SAR11 clade	Clade I	Clade Ib	uncultured bacterium	26	2	2	1	0	0	1	0	2	0	0	0	5	5	1	0	0	0	0	0	0	0	0	0
OTU_2836	Bacteria	Proteobacteria	Alphaproteobacteria	SAR11 clade	Clade II	Pelagibacteraceae bacterium ETNP-OMZ-SAG-E5	Pelagibacteraceae bacterium ETNP-OMZ-SAG-E5	0	2	1	0	0	0	0	0	0	0	0	0	0	0	1	1	1	0	0	0	0	0	0	0
OTU_2837	Bacteria	Actinobacteria	Acidimicrobiia	Actinomarinales	Actinomarinaceae	Candidatus Actinomarina	Unclassified	4	0	0	0	0	0	0	0	0	0	0	0	0	0	0	0	0	0	0	0	0	0	0	0
OTU_2839	Bacteria	Marinimicrobia (SAR406 clade)	Unclassified	Unclassified	Unclassified	Unclassified	Unclassified	1	0	0	0	0	0	0	0	0	0	0	0	0	0	0	0	0	0	0	0	0	0	2	0
OTU_284	Bacteria	Bacteroidetes	Bacteroidia	Flavobacteriales	Flavobacteriaceae	NS5 marine group	marine metagenome	46	5	0	0	0	0	17	0	0	0	0	0	91	2	0	0	0	0	4	0	0	0	1	0
OTU_2840	Bacteria	Proteobacteria	Alphaproteobacteria	Alphaproteobacteria Incertae Sedis	Unknown Family	Acuticoccus	Acuticoccus yangtzensis	1	0	0	0	0	0	0	0	0	0	0	1	0	0	0	0	0	0	0	0	0	0	0	0
OTU_2842	Bacteria	Proteobacteria	Gammaproteobacteria	HOC36	Unclassified	Unclassified	Unclassified	1	3	0	0	0	0	0	0	0	0	0	0	0	1	0	0	0	0	0	0	0	0	0	0
OTU_2844	Bacteria	Proteobacteria	Deltaproteobacteria	Bradymonadales	unidentified marine bacterioplankton	unidentified marine bacterioplankton	unidentified marine bacterioplankton	0	2	0	0	0	0	0	0	0	0	0	0	0	0	0	0	0	0	2	0	0	0	0	0
OTU_2845	Bacteria	Marinimicrobia (SAR406 clade)	uncultured bacterium	uncultured bacterium	uncultured bacterium	uncultured bacterium	uncultured bacterium	0	4	0	0	0	0	0	0	0	0	0	0	0	1	0	0	0	0	0	0	0	0	0	0
OTU_2846	Bacteria	Proteobacteria	Gammaproteobacteria	Nitrosococcales	Nitrosococcaceae	FS142-36B-02	uncultured bacterium	0	1	1	0	0	0	0	0	0	0	0	0	0	2	0	0	0	0	0	0	0	0	0	0
OTU_2847	Bacteria	Proteobacteria	Alphaproteobacteria	Rhodospirillales	AEGEAN-169 marine group	uncultured bacterium	uncultured bacterium	0	1	0	0	1	0	0	0	0	0	0	0	0	0	0	0	0	0	0	0	0	0	0	0
OTU_285	Bacteria	Chloroflexi	TK17	uncultured bacterium	uncultured bacterium	uncultured bacterium	uncultured bacterium	0	7	10	2	30	8	0	0	0	0	0	0	0	3	10	16	13	14	0	0	0	0	0	0
OTU_2850	Bacteria	Gemmatimonadetes	BD2-11 terrestrial group	Unclassified	Unclassified	Unclassified	Unclassified	0	0	0	0	0	2	0	0	0	0	0	0	0	0	3	1	0	1	0	0	0	0	0	0
OTU_2851	Bacteria	Proteobacteria	Deltaproteobacteria	Bdellovibrionales	Bdellovibrionaceae	OM27 clade	uncultured bacterium	0	0	0	0	0	0	0	0	0	0	0	0	0	1	2	0	0	0	0	0	0	0	0	0
OTU_2852	Bacteria	Proteobacteria	Deltaproteobacteria	SAR324 clade(Marine group B)	marine metagenome	marine metagenome	marine metagenome	0	0	0	0	0	0	0	0	0	0	0	0	0	0	5	0	0	0	0	0	0	0	0	0
OTU_2853	Bacteria	Proteobacteria	Deltaproteobacteria	SAR324 clade(Marine group B)	marine metagenome	marine metagenome	marine metagenome	0	0	6	0	0	0	0	0	5	0	0	0	0	0	12	0	0	1	0	0	0	0	0	0
OTU_2855	Bacteria	Proteobacteria	Alphaproteobacteria	Sphingomonadales	Sphingomonadaceae	Unclassified	Unclassified	1	0	0	0	0	0	0	0	0	0	0	2	0	0	0	0	1	0	0	2	0	0	0	0
OTU_2858	Bacteria	Proteobacteria	Alphaproteobacteria	Rhodobacterales	Rhodobacteraceae	Ketogulonicigenium	Unclassified	0	0	0	0	0	8	0	0	0	0	0	5	0	0	0	0	0	0	0	0	0	0	0	0
OTU_2859	Bacteria	Planctomycetes	Phycisphaerae	MSBL9	SM23-30	uncultured deep-sea bacterium	uncultured deep-sea bacterium	0	0	0	0	0	0	0	0	0	0	0	3	0	0	0	0	0	0	0	0	0	0	0	0
OTU_286	Bacteria	Planctomycetes	OM190	uncultured bacterium	uncultured bacterium	uncultured bacterium	uncultured bacterium	0	0	0	0	1	4	0	0	0	0	0	0	0	1	1	0	0	3	0	1	0	8	30	0
OTU_2860	Bacteria	Proteobacteria	Gammaproteobacteria	Cellvibrionales	Halieaceae	OM60(NOR5) clade	uncultured gamma proteobacterium KTc1119	1	0	0	0	0	0	2	0	0	0	0	0	2	0	0	0	0	0	0	0	0	0	0	0
OTU_2861	Bacteria	Proteobacteria	Alphaproteobacteria	Rhizobiales	Beijerinckiaceae	Methylobacterium	Unclassified	2	0	0	1	1	1	0	4	7	1	3	5	0	0	1	4	0	0	10	8	8	1	6	0
OTU_2864	Bacteria	Acidobacteria	Subgroup 5	uncultured deep-sea bacterium	uncultured deep-sea bacterium	uncultured deep-sea bacterium	uncultured deep-sea bacterium	0	0	3	0	1	2	0	0	0	0	0	0	0	0	1	0	0	0	0	0	0	0	0	0
OTU_2866	Bacteria	Proteobacteria	Deltaproteobacteria	Bdellovibrionales	Bdellovibrionaceae	OM27 clade	uncultured bacterium	0	0	3	0	0	1	0	0	0	0	0	0	0	0	2	0	1	0	0	0	0	0	0	0
OTU_2867	Bacteria	Proteobacteria	Deltaproteobacteria	Bdellovibrionales	Bacteriovoracaceae	Halobacteriovorax	Halobacteriovorax marinus SJ	0	0	0	0	0	2	0	0	0	0	0	0	0	0	0	0	0	0	0	0	0	0	0	0
OTU_2868	Bacteria	Proteobacteria	Gammaproteobacteria	Coxiellales	Coxiellaceae	Coxiella	uncultured bacterium	0	0	0	0	0	0	0	8	0	0	0	0	0	1	0	0	0	0	0	0	0	0	0	0
OTU_287	Bacteria	Proteobacteria	Alphaproteobacteria	Rickettsiales	SM2D12	uncultured alpha proteobacterium	uncultured alpha proteobacterium	0	0	0	0	0	26	0	0	0	0	0	0	0	0	0	0	0	0	0	0	0	0	0	0
OTU_2871	Bacteria	Acidobacteria	Subgroup 6	Unclassified	Unclassified	Unclassified	Unclassified	0	3	0	0	0	0	0	0	0	0	0	0	0	4	0	0	0	0	0	0	0	0	0	0
OTU_2872	Bacteria	Proteobacteria	Alphaproteobacteria	SAR11 clade	Clade I	Clade Ia	uncultured Pelagibacterales bacterium	181	163	44	0	7	18	36	8	8	0	2	2	53	176	67	2	3	9	20	14	4	0	7	0
OTU_2873	Bacteria	Marinimicrobia (SAR406 clade)	uncultured bacterium	uncultured bacterium	uncultured bacterium	uncultured bacterium	uncultured bacterium	0	2	0	0	0	0	0	0	0	0	0	0	0	3	0	0	0	0	0	0	0	0	0	0
OTU_2874	Bacteria	Proteobacteria	Alphaproteobacteria	SAR11 clade	Clade II	Unclassified	Unclassified	1	56	67	2	5	13	0	0	15	0	0	0	0	34	50	4	1	17	0	6	7	7	9	0
OTU_2876	Bacteria	Marinimicrobia (SAR406 clade)	Marinimicrobia bacterium SCGC AAA003-E22	Marinimicrobia bacterium SCGC AAA003-E22	Marinimicrobia bacterium SCGC AAA003-E22	Marinimicrobia bacterium SCGC AAA003-E22	Marinimicrobia bacterium SCGC AAA003-E22	0	8	11	0	1	5	0	0	0	0	0	0	0	6	18	3	5	0	0	0	0	0	0	0
OTU_2877	Bacteria	PAUC34f	uncultured bacterium	uncultured bacterium	uncultured bacterium	uncultured bacterium	uncultured bacterium	0	1	0	0	0	0	0	0	0	0	0	0	0	1	0	0	0	0	0	3	0	0	0	0
OTU_288	Bacteria	Bacteroidetes	Bacteroidia	Chitinophagales	Chitinophagaceae	uncultured	metagenome	0	0	0	0	0	0	0	0	0	0	0	0	0	0	0	36	0	0	0	0	0	0	0	0
OTU_2880	Bacteria	Proteobacteria	Deltaproteobacteria	Myxococcales	Blfdi19	uncultured deep-sea bacterium	uncultured deep-sea bacterium	0	0	0	0	0	0	0	0	0	0	0	0	0	0	0	0	0	0	0	0	0	0	6	0
OTU_2882	Bacteria	Unclassified	Unclassified	Unclassified	Unclassified	Unclassified	Unclassified	0	0	0	0	0	0	0	0	0	0	0	0	0	0	0	0	0	0	0	0	0	0	3	0
OTU_2883	Bacteria	Kiritimatiellaeota	Kiritimatiellae	WCHB1-41	uncultured planctomycete	uncultured planctomycete	uncultured planctomycete	0	0	0	0	0	0	0	0	0	0	0	1	0	0	0	0	0	0	0	0	1	0	4	0
OTU_2884	Bacteria	Hydrogenedentes	Hydrogenedentia	Hydrogenedentiales	Hydrogenedensaceae	uncultured bacterium	uncultured bacterium	0	0	0	0	2	0	0	0	3	0	0	0	0	0	2	0	0	0	0	0	0	1	5	0
OTU_2885	Bacteria	Firmicutes	Bacilli	Bacillales	Planococcaceae	Planococcus	Planococcus sp. mixed culture J5-8	0	0	0	0	0	0	0	0	0	0	0	0	0	0	0	0	0	0	5	0	0	0	1	0
OTU_2886	Bacteria	Marinimicrobia (SAR406 clade)	uncultured bacterium	uncultured bacterium	uncultured bacterium	uncultured bacterium	uncultured bacterium	6	0	0	0	0	0	0	0	0	0	0	0	0	0	0	0	0	0	0	0	0	0	1	0
OTU_2888	Bacteria	Proteobacteria	Alphaproteobacteria	Rhodobacterales	Rhodobacteraceae	Thiobacimonas	Salipiger nanhaiensis	1	0	0	3	2	8	0	0	0	0	0	5	0	0	0	0	5	25	0	0	0	11	36	0
OTU_2889	Bacteria	Proteobacteria	Deltaproteobacteria	PB19	uncultured marine bacterium	uncultured marine bacterium	uncultured marine bacterium	0	0	0	0	0	0	0	0	0	0	0	0	0	0	0	0	0	0	0	0	0	0	2	0
OTU_289	Bacteria	Proteobacteria	Alphaproteobacteria	Rhodobacterales	Rhodobacteraceae	uncultured	marine metagenome	19	0	0	0	1	0	12	2	2	1	0	0	21	7	1	0	0	0	13	0	0	0	10	0
OTU_2892	Bacteria	Proteobacteria	Deltaproteobacteria	NB1-j	uncultured marine bacterium	uncultured marine bacterium	uncultured marine bacterium	0	0	0	0	0	0	0	1	0	0	0	0	0	0	0	0	0	0	0	4	0	0	0	0
OTU_2893	Bacteria	Firmicutes	Bacilli	Lactobacillales	Aerococcaceae	Globicatella	Globicatella sanguinis NBRC 15551	0	0	0	0	0	0	0	0	0	0	0	0	0	0	0	0	0	0	0	2	0	0	0	0
OTU_2894	Bacteria	Proteobacteria	Gammaproteobacteria	Cellvibrionales	Halieaceae	Luminiphilus	uncultured gamma proteobacterium	0	0	0	0	0	0	0	0	0	0	0	0	0	0	0	0	0	0	0	0	2	0	0	0
OTU_2895	Bacteria	Proteobacteria	Gammaproteobacteria	Betaproteobacteriales	Burkholderiaceae	Pelomonas	Unclassified	0	0	0	0	0	0	0	0	0	0	0	0	0	0	0	1	0	0	0	0	1	1	0	0
OTU_2896	Bacteria	Proteobacteria	Gammaproteobacteria	Xanthomonadales	Rhodanobacteraceae	Aquimonas	uncultured bacterium	0	0	0	0	0	0	0	0	0	0	0	0	0	0	0	0	0	0	0	0	2	0	0	0
OTU_2897	Bacteria	Proteobacteria	Deltaproteobacteria	NB1-j	uncultured bacterium	uncultured bacterium	uncultured bacterium	0	0	0	0	0	0	0	0	0	0	0	0	0	0	0	0	0	0	0	0	3	0	0	0
OTU_2899	Bacteria	Bacteroidetes	Bacteroidia	Flavobacteriales	Flavobacteriaceae	Ulvibacter	Altibacter lentus	0	0	0	0	0	0	0	0	0	0	0	0	0	0	0	0	0	0	0	10	0	0	0	0
OTU_29	Bacteria	Proteobacteria	Alphaproteobacteria	Rickettsiales	AB1	Sinorickettsia chlamys	Sinorickettsia chlamys	1	0	0	13	54	58	0	0	0	15	0	8	0	0	12	84	66	5	0	0	1	36	33	48
OTU_290	Bacteria	Proteobacteria	Gammaproteobacteria	Ga0077536	uncultured bacterium	uncultured bacterium	uncultured bacterium	0	0	8	2	14	15	0	0	0	0	0	0	0	0	8	6	5	6	0	0	0	0	1	0
OTU_2900	Bacteria	Proteobacteria	Alphaproteobacteria	uncultured	uncultured bacterium KM3-47-A6	uncultured bacterium KM3-47-A6	uncultured bacterium KM3-47-A6	0	0	0	0	0	0	0	0	0	0	0	0	0	2	0	0	0	0	0	0	0	0	0	0
OTU_2901	Bacteria	Planctomycetes	BD7-11	uncultured bacterium	uncultured bacterium	uncultured bacterium	uncultured bacterium	0	0	0	0	0	0	0	0	0	0	2	0	0	0	0	0	0	0	0	0	0	0	0	0
OTU_2902	Bacteria	Proteobacteria	Gammaproteobacteria	Oceanospirillales	Saccharospirillaceae	Reinekea	uncultured bacterium	0	0	0	0	0	4	0	0	0	0	0	2	0	0	0	0	0	0	0	0	0	0	0	0
OTU_2905	Bacteria	Firmicutes	Clostridia	Clostridiales	Clostridiaceae 1	Clostridium sensu stricto 1	unidentified	0	0	0	0	1	0	0	0	4	0	0	0	0	0	0	0	0	0	2	0	0	0	3	0
OTU_2906	Bacteria	Planctomycetes	BD7-11	uncultured bacterium	uncultured bacterium	uncultured bacterium	uncultured bacterium	0	0	0	0	0	0	0	0	0	0	0	0	0	0	0	0	0	0	0	0	0	0	2	0
OTU_2907	Bacteria	Proteobacteria	Alphaproteobacteria	Acetobacterales	Acetobacteraceae	uncultured	uncultured bacterium	0	0	0	0	0	1	0	0	0	0	0	0	0	0	0	0	0	0	0	0	0	3	0	0
OTU_2908	Bacteria	Proteobacteria	Alphaproteobacteria	Rhodobacterales	Rhodobacteraceae	Thiobacimonas	Salipiger nanhaiensis	0	0	0	0	0	2	0	0	0	0	0	2	0	0	0	0	0	3	0	0	0	1	5	0
OTU_2909	Bacteria	Proteobacteria	Deltaproteobacteria	Myxococcales	Haliangiaceae	Haliangium	uncultured deep-sea bacterium	0	0	1	0	0	0	0	0	0	0	0	0	0	0	0	0	0	0	0	0	0	0	9	0
OTU_2911	Bacteria	Unclassified	Unclassified	Unclassified	Unclassified	Unclassified	Unclassified	0	0	0	0	0	3	0	0	0	0	0	0	0	0	0	0	0	0	0	0	0	0	0	0
OTU_2912	Bacteria	Proteobacteria	Gammaproteobacteria	Cellvibrionales	Halieaceae	OM60(NOR5) clade	marine metagenome	0	0	0	0	0	3	0	0	0	0	0	0	0	0	0	0	0	0	0	0	0	0	0	0
OTU_2913	Bacteria	Proteobacteria	Alphaproteobacteria	Micavibrionales	Micavibrionaceae	uncultured	uncultured bacterium	0	0	0	0	0	1	0	0	0	0	0	1	0	0	0	0	0	0	0	0	0	0	0	0
OTU_2917	Bacteria	Proteobacteria	Gammaproteobacteria	Alteromonadales	Pseudoalteromonadaceae	Pseudoalteromonas	Unclassified	0	0	0	0	0	0	4	4	0	0	0	0	0	0	0	0	0	0	0	0	0	0	0	0
OTU_2918	Bacteria	Proteobacteria	Deltaproteobacteria	Bradymonadales	Unclassified	Unclassified	Unclassified	0	0	0	0	0	0	0	0	0	0	0	0	0	0	0	0	1	0	0	0	11	5	1	0
OTU_292	Bacteria	Proteobacteria	Gammaproteobacteria	Methylococcales	Methylomonaceae	IheB2-23	uncultured bacterium	0	0	4	0	1	29	0	0	1	0	0	2	0	0	1	0	5	20	0	0	0	0	0	0
OTU_2921	Bacteria	Planctomycetes	BD7-11	uncultured Planctomycetaceae bacterium	uncultured Planctomycetaceae bacterium	uncultured Planctomycetaceae bacterium	uncultured Planctomycetaceae bacterium	0	0	0	0	0	0	0	2	1	0	0	0	0	0	0	0	0	0	0	0	0	0	0	0
OTU_2923	Bacteria	Planctomycetes	OM190	Unclassified	Unclassified	Unclassified	Unclassified	0	0	0	0	0	0	0	1	0	0	0	0	0	0	0	0	0	0	1	0	0	0	0	0
OTU_2924	Bacteria	Bacteroidetes	Bacteroidia	Flavobacteriales	Crocinitomicaceae	Fluviicola	uncultured marine bacterium	2	0	0	0	0	0	0	0	2	0	0	0	1	0	0	0	0	0	2	0	0	0	0	0
OTU_2926	Bacteria	Proteobacteria	Gammaproteobacteria	Oceanospirillales	Kangiellaceae	uncultured	uncultured bacterium	0	0	0	0	3	0	0	0	0	0	0	0	0	0	0	0	0	0	0	0	0	0	1	0
OTU_2929	Bacteria	Acidobacteria	Subgroup 6	uncultured bacterium	uncultured bacterium	uncultured bacterium	uncultured bacterium	0	0	2	0	0	0	0	0	2	0	0	0	0	0	2	0	0	0	0	0	1	0	0	0
OTU_293	Bacteria	Bacteroidetes	Bacteroidia	Chitinophagales	Saprospiraceae	Lewinella	Cladosiphon okamuranus	0	0	0	0	2	0	0	0	49	0	0	0	0	0	0	0	0	0	0	29	0	0	0	0
OTU_2931	Bacteria	Proteobacteria	Alphaproteobacteria	SAR11 clade	Clade I	uncultured	Unclassified	0	1	0	0	0	0	0	0	1	0	0	0	0	0	0	0	0	1	0	0	0	0	0	0
OTU_2932	Bacteria	Bacteroidetes	Bacteroidia	Chitinophagales	Saprospiraceae	Lewinella	Lewinella nigricans	0	0	0	0	0	0	0	0	2	0	0	0	0	0	0	0	0	0	0	0	0	0	0	0
OTU_2933	Bacteria	Proteobacteria	Alphaproteobacteria	Rhizobiales	Beijerinckiaceae	Methylobacterium	Unclassified	2	0	1	0	3	0	0	1	3	1	0	0	0	1	0	1	1	0	10	2	5	4	6	0
OTU_2934	Bacteria	Bacteroidetes	Bacteroidia	Flavobacteriales	Flavobacteriaceae	Unclassified	Unclassified	0	0	0	0	0	1	0	0	0	0	0	0	0	0	0	0	0	0	1	0	0	0	0	0
OTU_2938	Bacteria	Planctomycetes	OM190	uncultured bacterium	uncultured bacterium	uncultured bacterium	uncultured bacterium	0	0	0	0	0	0	0	0	0	0	0	0	0	0	0	0	0	0	0	6	0	0	0	0
OTU_294	Bacteria	Acidobacteria	Subgroup 6	uncultured bacterium KM3-173-A5	uncultured bacterium KM3-173-A5	uncultured bacterium KM3-173-A5	uncultured bacterium KM3-173-A5	0	0	33	38	82	51	0	0	1	0	0	0	0	0	68	152	66	69	0	0	1	0	5	0
OTU_2941	Bacteria	Proteobacteria	Deltaproteobacteria	PB19	uncultured marine bacterium	uncultured marine bacterium	uncultured marine bacterium	0	0	0	0	0	0	0	0	0	0	0	0	0	0	0	0	0	0	5	0	0	0	1	0
OTU_2943	Bacteria	Proteobacteria	Deltaproteobacteria	Bradymonadales	Unclassified	Unclassified	Unclassified	0	0	0	0	0	0	0	1	0	0	0	0	0	0	0	0	0	0	0	3	0	0	0	0
OTU_2945	Bacteria	Epsilonbacteraeota	Campylobacteria	Campylobacterales	Campylobacteraceae	Campylobacter	Campylobacter gracilis	0	0	0	0	0	0	0	0	0	0	0	0	0	0	0	0	0	0	0	0	1	0	1	0
OTU_2946	Bacteria	Verrucomicrobia	Verrucomicrobiae	Opitutales	Puniceicoccaceae	Verruc-01	Unclassified	0	0	0	0	0	0	0	1	0	0	0	0	0	0	0	0	0	0	0	2	0	0	0	0
OTU_2947	Bacteria	Proteobacteria	Deltaproteobacteria	Myxococcales	Nannocystaceae	uncultured	uncultured Enhygromyxa sp.	0	0	0	0	0	0	0	0	0	0	0	0	0	0	0	0	0	0	0	2	0	0	0	0
OTU_2948	Bacteria	Planctomycetes	OM190	uncultured bacterium	uncultured bacterium	uncultured bacterium	uncultured bacterium	0	0	0	1	0	0	0	0	0	0	0	1	0	0	0	0	0	0	0	0	0	0	2	0
OTU_2949	Bacteria	Proteobacteria	Gammaproteobacteria	Alteromonadales	Alteromonadaceae	Alteromonas	Alteromonas australica	0	0	0	9	3	0	0	1	6	32	33	4	0	0	1	0	1	1	1	27	42	20	2	0
OTU_295	Bacteria	Proteobacteria	Deltaproteobacteria	NB1-j	uncultured bacterium	uncultured bacterium	uncultured bacterium	0	0	6	0	0	3	0	0	61	5	4	0	0	0	12	0	0	0	0	5	67	0	1	0
OTU_2951	Bacteria	Proteobacteria	Gammaproteobacteria	Oceanospirillales	Nitrincolaceae	Marinobacterium	uncultured Marinobacterium sp.	0	1	0	0	0	0	0	0	0	0	0	0	0	0	0	0	0	0	0	0	2	0	0	0
OTU_2952	Bacteria	Proteobacteria	Deltaproteobacteria	Bradymonadales	uncultured Geobacteraceae bacterium	uncultured Geobacteraceae bacterium	uncultured Geobacteraceae bacterium	0	0	0	0	0	0	0	0	0	0	0	0	0	0	0	2	0	0	0	0	0	1	9	0
OTU_2954	Bacteria	Planctomycetes	028H05-P-BN-P5	uncultured bacterium	uncultured bacterium	uncultured bacterium	uncultured bacterium	0	0	0	0	0	0	0	0	0	0	0	1	0	0	0	0	0	0	0	1	0	0	6	0
OTU_2955	Bacteria	Planctomycetes	Pla3 lineage	uncultured planctomycete	uncultured planctomycete	uncultured planctomycete	uncultured planctomycete	0	0	0	0	0	0	0	0	4	0	0	0	0	0	0	0	0	0	0	0	4	0	0	0
OTU_2956	Bacteria	Planctomycetes	Pla4 lineage	uncultured bacterium	uncultured bacterium	uncultured bacterium	uncultured bacterium	0	1	0	0	0	0	0	0	0	0	0	0	0	1	0	0	0	0	0	0	1	0	0	0
OTU_2958	Bacteria	Proteobacteria	Alphaproteobacteria	SAR11 clade	Clade I	uncultured	uncultured alpha proteobacterium	0	0	0	0	2	3	0	0	2	0	1	0	0	0	3	1	3	2	0	0	0	1	0	0
OTU_2959	Bacteria	Proteobacteria	Deltaproteobacteria	PB19	uncultured bacterium	uncultured bacterium	uncultured bacterium	0	0	0	0	0	0	0	0	1	0	0	0	0	0	0	0	0	0	0	0	2	0	0	0
OTU_296	Bacteria	Planctomycetes	OM190	uncultured bacterium	uncultured bacterium	uncultured bacterium	uncultured bacterium	0	0	0	0	0	0	0	0	0	0	0	0	0	0	0	0	0	0	0	0	0	0	0	26
OTU_2960	Bacteria	Firmicutes	Clostridia	Clostridiales	Lachnospiraceae	[Ruminococcus] gnavus group	uncultured bacterium	0	0	0	0	0	0	0	0	0	0	0	0	0	0	0	0	0	0	0	0	6	0	0	0
OTU_2961	Bacteria	Cyanobacteria	Oxyphotobacteria	Synechococcales	Cyanobiaceae	Synechococcus CC9902	Unclassified	4	4	0	0	0	0	7	0	0	0	0	0	19	0	1	1	1	0	28	0	0	2	7	0
OTU_2962	Bacteria	Actinobacteria	Acidimicrobiia	Microtrichales	Microtrichaceae	Sva0996 marine group	marine metagenome	0	2	0	0	0	3	0	1	0	0	0	0	1	0	0	0	0	0	0	0	0	0	1	0
OTU_2964	Bacteria	Proteobacteria	Alphaproteobacteria	Rhodobacterales	Rhodobacteraceae	Unclassified	Unclassified	0	0	0	0	1	2	0	0	0	0	0	0	0	0	0	0	0	0	0	0	0	0	0	0
OTU_2966	Bacteria	Firmicutes	Bacilli	Bacillales	Family XI	Gemella	Gemella asaccharolytica	0	0	0	0	0	0	0	0	0	0	0	0	0	0	0	1	0	0	0	0	0	0	3	0
OTU_2967	Bacteria	Proteobacteria	Gammaproteobacteria	Legionellales	Legionellaceae	Legionella	Unclassified	0	0	0	0	0	0	0	0	0	0	0	0	0	0	0	0	0	0	0	0	0	3	0	0
OTU_2968	Bacteria	Proteobacteria	Gammaproteobacteria	Coxiellales	Coxiellaceae	Coxiella	uncultured marine bacterium	0	0	0	0	0	2	0	0	0	0	0	0	0	0	0	0	0	0	0	0	0	0	0	0
OTU_2969	Bacteria	Patescibacteria	Gracilibacteria	Unclassified	Unclassified	Unclassified	Unclassified	0	0	0	0	0	2	0	0	0	0	0	0	0	0	0	0	0	1	0	0	0	0	0	0
OTU_297	Bacteria	Planctomycetes	Planctomycetacia	Pirellulales	Pirellulaceae	Blastopirellula	uncultured marine bacterium	0	0	0	0	0	0	0	1	0	0	0	0	1	0	0	1	0	0	25	0	0	0	0	0
OTU_2972	Bacteria	Planctomycetes	OM190	uncultured bacterium	uncultured bacterium	uncultured bacterium	uncultured bacterium	0	0	0	0	0	0	0	5	0	0	0	0	0	0	0	0	0	0	0	0	0	0	0	0
OTU_2973	Bacteria	Proteobacteria	Gammaproteobacteria	Unclassified	Unclassified	Unclassified	Unclassified	0	0	0	0	1	0	0	0	0	0	0	0	0	0	1	0	0	0	0	0	0	0	0	0
OTU_2974	Bacteria	Proteobacteria	Deltaproteobacteria	Bdellovibrionales	Bdellovibrionaceae	OM27 clade	uncultured bacterium	0	0	0	0	0	0	0	1	0	0	0	0	0	0	1	0	0	0	0	0	2	0	0	0
OTU_2977	Bacteria	Lentisphaerae	Lentisphaeria	Lentisphaerales	Lentisphaeraceae	Lentisphaera	uncultured bacterium	0	0	0	0	0	3	0	0	0	0	0	0	0	0	0	0	0	1	0	0	0	0	0	0
OTU_2978	Bacteria	Kiritimatiellaeota	Kiritimatiellae	Kiritimatiellales	Kiritimatiellaceae	MSBL3	uncultured organism	0	0	1	2	0	1	0	0	0	0	0	0	0	0	0	0	0	0	0	0	0	0	0	0
OTU_2979	Bacteria	Marinimicrobia (SAR406 clade)	uncultured Candidatus Marinimicrobia bacterium	uncultured Candidatus Marinimicrobia bacterium	uncultured Candidatus Marinimicrobia bacterium	uncultured Candidatus Marinimicrobia bacterium	uncultured Candidatus Marinimicrobia bacterium	0	0	1	0	2	4	0	0	0	0	0	0	0	0	0	1	0	3	0	0	0	1	0	0
OTU_298	Bacteria	Bacteroidetes	Bacteroidia	Flavobacteriales	Flavobacteriaceae	NS5 marine group	marine metagenome	148	0	1	0	1	0	23	0	0	0	0	0	30	0	0	0	0	0	0	4	0	0	4	0
OTU_2982	Bacteria	Proteobacteria	Deltaproteobacteria	Myxococcales	Sandaracinaceae	uncultured	Unclassified	0	0	0	0	0	0	0	4	0	0	0	0	0	0	0	0	0	0	0	0	0	0	0	0
OTU_2984	Bacteria	Proteobacteria	Alphaproteobacteria	Unclassified	Unclassified	Unclassified	Unclassified	0	0	0	0	0	0	0	2	1	0	0	0	0	0	0	0	0	0	0	6	0	0	0	0
OTU_2988	Bacteria	Proteobacteria	Gammaproteobacteria	Coxiellales	Coxiellaceae	Coxiella	Unclassified	0	7	0	0	1	0	0	0	0	0	0	0	0	0	0	0	0	0	0	0	0	0	0	0
OTU_2989	Bacteria	Proteobacteria	Deltaproteobacteria	RCP2-54	Unclassified	Unclassified	Unclassified	0	3	2	0	2	0	0	0	2	0	0	0	0	0	3	4	0	0	0	0	0	0	0	0
OTU_299	Bacteria	Actinobacteria	Actinobacteria	Corynebacteriales	Corynebacteriaceae	Corynebacterium 1	Unclassified	0	0	1	3	0	8	0	1	3	0	0	4	1	0	0	2	2	4	0	5	4	22	9	0
OTU_2991	Bacteria	Proteobacteria	Alphaproteobacteria	SAR11 clade	Clade II	Unclassified	Unclassified	0	0	1	1	0	2	0	0	0	0	0	0	0	0	0	0	0	0	0	0	0	0	0	0
OTU_2992	Bacteria	Proteobacteria	Gammaproteobacteria	SAR86 clade	uncultured gamma proteobacterium HF0770_40P16	uncultured gamma proteobacterium HF0770_40P16	uncultured gamma proteobacterium HF0770_40P16	0	0	0	1	0	0	0	0	0	0	0	0	0	0	0	1	0	0	0	0	0	0	0	0
OTU_2993	Bacteria	Proteobacteria	Deltaproteobacteria	Oligoflexales	Oligoflexaceae	uncultured	uncultured marine bacterium	0	0	1	0	0	0	0	0	2	0	0	0	0	0	0	0	0	0	0	0	0	0	0	0
OTU_2994	Bacteria	Chloroflexi	Dehalococcoidia	SAR202 clade	uncultured marine microorganism	uncultured marine microorganism	uncultured marine microorganism	0	0	0	0	0	5	0	0	0	0	0	0	0	0	0	0	0	0	0	0	0	0	0	0
OTU_2995	Bacteria	Proteobacteria	Gammaproteobacteria	UBA10353 marine group	uncultured organism	uncultured organism	uncultured organism	3	2	13	0	1	9	2	0	0	0	0	0	4	1	7	3	4	0	2	0	0	0	0	0
OTU_2996	Bacteria	Proteobacteria	Gammaproteobacteria	Francisellales	Francisellaceae	uncultured	uncultured bacterium	0	0	2	0	0	0	0	0	0	0	0	0	0	0	0	0	0	0	0	0	0	0	0	0
OTU_2997	Bacteria	Marinimicrobia (SAR406 clade)	uncultured bacterium	uncultured bacterium	uncultured bacterium	uncultured bacterium	uncultured bacterium	0	2	3	0	2	0	0	0	0	0	0	0	0	1	0	0	0	0	0	0	0	0	0	0
OTU_2998	Bacteria	Proteobacteria	Gammaproteobacteria	Pseudomonadales	Moraxellaceae	Acinetobacter	Unclassified	0	0	0	0	2	0	0	0	0	0	1	0	0	0	0	0	0	0	0	0	0	0	0	0
OTU_3	Bacteria	Proteobacteria	Alphaproteobacteria	Sphingomonadales	Sphingomonadaceae	Altererythrobacter	uncultured organism	414	64	95	394	1643	1300	27	195	186	45	68	436	159	11	47	274	232	240	1006	121	109	89	141	142
OTU_30	Bacteria	Proteobacteria	Gammaproteobacteria	Oceanospirillales	Alcanivoracaceae	Alcanivorax	Alcanivorax sp. I2	62	35	14	1	4	1	2	430	11	4	4	6	0	7	1	0	2	0	51	457	1	2	0	1
OTU_300	Bacteria	Proteobacteria	Alphaproteobacteria	SAR11 clade	Clade II	uncultured bacterium	uncultured bacterium	244	16	23	0	2	5	27	8	6	0	0	0	27	33	4	2	3	5	63	3	3	1	2	0
OTU_3000	Bacteria	Chloroflexi	Dehalococcoidia	SAR202 clade	uncultured Chloroflexi bacterium	uncultured Chloroflexi bacterium	uncultured Chloroflexi bacterium	0	0	2	1	0	2	0	0	2	0	0	0	0	0	1	0	0	0	0	0	0	0	1	0
OTU_3002	Bacteria	Proteobacteria	Alphaproteobacteria	Sphingomonadales	Sphingomonadaceae	Altererythrobacter	Unclassified	0	16	2	0	0	0	0	1	11	0	0	0	0	2	0	0	0	0	0	5	0	0	0	0
OTU_3003	Bacteria	Bacteroidetes	Bacteroidia	Flavobacteriales	Flavobacteriaceae	Tenacibaculum	Cytophaga sp. IAJ12	0	0	0	0	2	1	0	0	0	0	0	0	0	0	0	0	0	0	0	0	0	0	0	0
OTU_3005	Bacteria	Marinimicrobia (SAR406 clade)	Unclassified	Unclassified	Unclassified	Unclassified	Unclassified	0	0	0	0	2	4	0	0	0	0	0	0	0	0	0	2	0	1	0	0	0	0	0	0
OTU_3007	Bacteria	Marinimicrobia (SAR406 clade)	uncultured bacterium	uncultured bacterium	uncultured bacterium	uncultured bacterium	uncultured bacterium	0	1	0	0	0	3	0	0	0	0	0	0	0	0	0	0	0	0	0	0	3	0	0	0
OTU_3009	Bacteria	Proteobacteria	Alphaproteobacteria	Caulobacterales	Caulobacteraceae	Brevundimonas	Brevundimonas albigilva	0	0	0	1	1	3	1	0	0	0	8	0	0	0	0	0	0	0	0	0	0	0	0	0
OTU_301	Bacteria	Proteobacteria	Deltaproteobacteria	NB1-j	uncultured bacterium	uncultured bacterium	uncultured bacterium	0	0	6	1	0	7	0	0	4	0	0	0	0	0	5	3	2	22	0	0	4	8	13	0
OTU_3010	Bacteria	Bacteroidetes	Bacteroidia	Flavobacteriales	Flavobacteriaceae	Winogradskyella	uncultured bacterium	4	0	2	61	1	3	0	3	24	11	1	0	0	1	0	2	2	1	4	14	5	18	6	0
OTU_3012	Bacteria	Patescibacteria	ABY1	Candidatus Falkowbacteria	uncultured Parcubacteria group bacterium	uncultured Parcubacteria group bacterium	uncultured Parcubacteria group bacterium	0	0	0	0	0	5	0	0	0	0	0	0	0	0	0	0	0	0	0	0	0	0	0	0
OTU_3013	Bacteria	Proteobacteria	Gammaproteobacteria	Alteromonadales	Alteromonadaceae	Unclassified	Unclassified	0	0	0	2	0	0	0	0	0	0	0	0	0	0	0	0	0	0	0	0	0	0	0	0
OTU_3016	Bacteria	Marinimicrobia (SAR406 clade)	Unclassified	Unclassified	Unclassified	Unclassified	Unclassified	0	0	2	0	1	0	0	0	0	0	0	0	0	0	0	0	0	0	0	0	0	0	0	0
OTU_3017	Bacteria	Verrucomicrobia	Verrucomicrobiae	Opitutales	Puniceicoccaceae	MB11C04 marine group	Unclassified	0	2	1	0	0	0	0	0	0	0	0	0	0	1	4	1	0	0	0	0	0	0	0	0
OTU_3018	Bacteria	Proteobacteria	Alphaproteobacteria	SAR11 clade	Clade I	uncultured	Unclassified	0	1	0	0	0	0	0	0	0	0	0	0	0	0	3	0	0	0	0	0	0	0	0	0
OTU_3019	Bacteria	Proteobacteria	Gammaproteobacteria	OM182 clade	uncultured gamma proteobacterium	uncultured gamma proteobacterium	uncultured gamma proteobacterium	0	4	0	0	0	0	0	0	0	0	0	0	0	0	0	0	0	0	0	1	0	0	0	0
OTU_302	Bacteria	Proteobacteria	Gammaproteobacteria	Alteromonadales	Unclassified	Unclassified	Unclassified	0	0	0	1	2	0	0	0	0	3	311	1	0	0	0	0	2	0	0	0	1	2	0	0
OTU_3020	Bacteria	Proteobacteria	Alphaproteobacteria	SAR11 clade	Clade II	uncultured bacterium	uncultured bacterium	0	22	12	0	1	5	0	1	19	0	0	0	0	12	17	1	5	2	0	2	5	8	4	0
OTU_3021	Bacteria	Margulisbacteria	metagenome	metagenome	metagenome	metagenome	metagenome	2	0	5	0	1	0	0	0	0	0	0	0	0	0	0	0	0	0	0	0	0	0	0	0
OTU_3024	Bacteria	Proteobacteria	Deltaproteobacteria	Myxococcales	Sandaracinaceae	uncultured	marine metagenome	0	0	0	1	1	0	0	0	0	0	0	0	0	0	0	0	0	0	0	0	0	0	0	0
OTU_3025	Bacteria	Proteobacteria	Alphaproteobacteria	SAR11 clade	Clade II	Unclassified	Unclassified	1	30	66	0	28	23	0	0	62	3	5	1	0	13	91	8	5	13	0	1	25	11	7	0
OTU_3027	Bacteria	Actinobacteria	Acidimicrobiia	Microtrichales	Microtrichaceae	Sva0996 marine group	Unclassified	0	2	0	0	0	0	0	0	0	0	0	0	0	1	0	0	0	0	0	0	0	0	0	0
OTU_3028	Bacteria	Actinobacteria	Acidimicrobiia	Actinomarinales	Actinomarinaceae	Candidatus Actinomarina	uncultured bacterium	0	5	0	0	0	0	0	0	0	0	0	0	0	0	0	0	0	0	0	0	0	0	0	0
OTU_303	Bacteria	Actinobacteria	Acidimicrobiia	Actinomarinales	Actinomarinaceae	Candidatus Actinomarina	uncultured marine eukaryote	2	5	2	0	1	1	28	0	0	6	0	0	59	0	0	0	0	0	80	0	1	0	1	0
OTU_3030	Bacteria	Chloroflexi	Dehalococcoidia	SAR202 clade	uncultured bacterium	uncultured bacterium	uncultured bacterium	0	0	1	0	0	0	0	0	0	0	0	0	0	0	0	0	0	1	0	0	0	0	0	0
OTU_3032	Bacteria	Proteobacteria	Alphaproteobacteria	Micavibrionales	Micavibrionaceae	uncultured	uncultured organism	0	1	0	0	0	0	0	0	1	0	0	0	0	0	0	0	0	0	0	0	0	0	0	0
OTU_3033	Bacteria	Planctomycetes	OM190	Unclassified	Unclassified	Unclassified	Unclassified	0	0	0	0	0	0	0	0	5	0	0	0	0	0	0	0	0	0	0	0	0	0	0	0
OTU_3035	Bacteria	Proteobacteria	Alphaproteobacteria	Sphingomonadales	Sphingomonadaceae	Unclassified	Unclassified	0	0	0	0	5	0	0	0	0	0	0	0	0	0	0	0	0	0	0	0	0	0	0	0
OTU_3036	Bacteria	Proteobacteria	Alphaproteobacteria	SAR11 clade	Clade II	uncultured alpha proteobacterium	uncultured alpha proteobacterium	0	0	1	0	1	0	0	0	0	0	0	0	0	0	2	1	1	0	0	0	1	0	1	0
OTU_3037	Bacteria	Proteobacteria	Gammaproteobacteria	Alteromonadales	Alteromonadaceae	Alteromonas	Alteromonas australica	0	0	0	2	1	0	0	0	0	0	0	0	0	0	0	0	0	0	0	0	1	0	0	0
OTU_3038	Bacteria	Chloroflexi	Dehalococcoidia	SAR202 clade	Unclassified	Unclassified	Unclassified	0	1	0	0	1	0	0	0	0	0	0	0	0	0	0	0	0	0	0	0	0	1	0	0
OTU_304	Bacteria	Planctomycetes	OM190	uncultured planctomycete	uncultured planctomycete	uncultured planctomycete	uncultured planctomycete	0	0	3	0	2	0	0	26	60	4	7	12	0	0	2	1	0	0	0	46	28	33	38	0
OTU_3040	Bacteria	Proteobacteria	Gammaproteobacteria	Alteromonadales	Alteromonadaceae	Alteromonas	Unclassified	1	0	0	0	0	1	0	2	1	3	2	5	0	0	0	0	0	0	0	2	2	0	1	0
OTU_3041	Bacteria	Proteobacteria	Deltaproteobacteria	Bdellovibrionales	Bacteriovoracaceae	Halobacteriovorax	uncultured bacterium	0	0	0	0	0	7	0	0	0	0	0	0	0	0	0	0	0	0	0	0	0	0	0	0
OTU_3044	Bacteria	Firmicutes	Clostridia	Clostridiales	Ruminococcaceae	Subdoligranulum	uncultured bacterium	0	0	0	0	0	0	0	0	0	0	0	0	0	0	0	0	2	0	0	0	0	0	0	0
OTU_3047	Bacteria	Proteobacteria	Alphaproteobacteria	Rickettsiales	Rickettsiaceae	Candidatus Cryptoprodotis	Unclassified	0	0	0	0	0	0	0	0	0	0	0	0	0	1	0	0	0	0	0	1	0	0	0	0
OTU_3048	Bacteria	Chloroflexi	Dehalococcoidia	SAR202 clade	uncultured Thermomicrobium sp.	uncultured Thermomicrobium sp.	uncultured Thermomicrobium sp.	0	0	1	0	0	0	0	0	0	0	0	0	0	0	6	0	0	0	0	0	0	0	0	0
OTU_3049	Bacteria	Proteobacteria	Gammaproteobacteria	Gammaproteobacteria Incertae Sedis	Unknown Family	Unclassified	Unclassified	0	0	0	0	0	0	0	0	0	0	0	0	0	0	1	0	0	0	0	0	0	0	4	0
OTU_305	Bacteria	Proteobacteria	Gammaproteobacteria	Cellvibrionales	Spongiibacteraceae	uncultured	uncultured bacterium	0	5	0	1	0	0	0	87	9	11	8	0	0	0	0	0	0	0	13	2	0	0	0	0
OTU_3050	Bacteria	Proteobacteria	Alphaproteobacteria	Rhodobacterales	Rhodobacteraceae	Thiobacimonas	Salipiger nanhaiensis	1	0	0	0	1	9	0	0	0	1	1	6	0	0	1	7	2	17	0	0	0	2	24	0
OTU_3051	Bacteria	Marinimicrobia (SAR406 clade)	Unclassified	Unclassified	Unclassified	Unclassified	Unclassified	0	3	11	2	15	17	0	0	1	0	0	0	0	7	11	5	11	43	0	0	0	0	1	0
OTU_3054	Bacteria	Verrucomicrobia	Verrucomicrobiae	Arctic97B-4 marine group	uncultured bacterium	uncultured bacterium	uncultured bacterium	0	0	1	0	0	1	0	0	0	0	0	0	0	0	4	0	0	1	0	0	1	0	0	0
OTU_3056	Bacteria	Proteobacteria	Alphaproteobacteria	Rhodospirillales	Magnetospiraceae	Magnetospira	uncultured bacterium	0	0	1	0	0	0	0	0	0	0	0	0	0	0	1	0	0	0	0	0	0	0	0	0
OTU_3057	Bacteria	Nitrospirae	Nitrospira	Nitrospirales	Nitrospiraceae	Nitrospira	Unclassified	0	0	0	0	0	0	0	0	0	0	0	0	0	0	0	6	0	0	0	0	0	0	0	0
OTU_3058	Bacteria	Proteobacteria	Gammaproteobacteria	Salinisphaerales	Salinisphaeraceae	Salinisphaera	uncultured bacterium	2	0	0	1	3	0	0	1	2	1	7	9	0	0	19	6	9	6	0	13	10	76	5	1
OTU_3059	Bacteria	Planctomycetes	BD7-11	Unclassified	Unclassified	Unclassified	Unclassified	0	0	1	0	0	0	0	0	0	0	0	0	0	0	1	0	1	0	0	0	0	0	0	0
OTU_3061	Bacteria	Planctomycetes	Planctomycetacia	Pirellulales	Pirellulaceae	uncultured	uncultured marine microorganism	0	0	0	0	2	1	0	0	0	0	0	0	0	0	0	1	10	0	0	0	0	0	0	0
OTU_3062	Bacteria	Chloroflexi	Dehalococcoidia	SAR202 clade	uncultured marine microorganism	uncultured marine microorganism	uncultured marine microorganism	0	0	0	0	0	0	0	0	0	0	0	0	0	0	0	0	2	0	0	0	0	0	0	0
OTU_3064	Bacteria	Margulisbacteria	uncultured bacterium	uncultured bacterium	uncultured bacterium	uncultured bacterium	uncultured bacterium	1	0	1	0	0	0	0	0	0	0	0	0	0	0	1	0	0	0	0	0	0	0	0	0
OTU_3065	Bacteria	Proteobacteria	Gammaproteobacteria	Betaproteobacteriales	Burkholderiaceae	Cupriavidus	Unclassified	0	0	0	0	0	0	0	0	0	0	0	0	0	0	0	1	1	0	0	0	0	0	0	0
OTU_3066	Bacteria	Chloroflexi	Dehalococcoidia	SAR202 clade	Unclassified	Unclassified	Unclassified	0	0	0	0	0	0	0	0	0	0	0	0	0	0	0	0	2	0	0	0	0	0	0	0
OTU_307	Bacteria	Proteobacteria	Gammaproteobacteria	uncultured	uncultured bacterium	uncultured bacterium	uncultured bacterium	0	0	8	0	14	0	0	9	20	0	2	0	0	12	0	0	3	1	9	108	0	4	0	0
OTU_3070	Bacteria	Margulisbacteria	uncultured marine cyanobacterium	uncultured marine cyanobacterium	uncultured marine cyanobacterium	uncultured marine cyanobacterium	uncultured marine cyanobacterium	2	0	0	0	0	0	0	0	0	0	0	0	0	0	0	0	0	0	0	0	0	0	0	0
OTU_3071	Bacteria	Actinobacteria	Actinobacteria	Micrococcales	Microbacteriaceae	Microbacterium	Unclassified	0	0	0	0	0	3	0	0	0	0	0	0	0	0	0	0	2	0	0	0	0	0	0	0
OTU_3072	Bacteria	Proteobacteria	Alphaproteobacteria	SAR11 clade	Clade I	Clade Ia	Unclassified	6	0	0	0	0	0	0	0	0	0	0	0	0	0	0	0	0	0	0	0	0	0	0	0
OTU_3075	Bacteria	Acidobacteria	Subgroup 21	uncultured deep-sea bacterium	uncultured deep-sea bacterium	uncultured deep-sea bacterium	uncultured deep-sea bacterium	0	0	0	0	0	6	0	0	0	0	1	0	0	0	1	0	0	1	0	0	0	0	0	0
OTU_3076	Bacteria	Proteobacteria	Alphaproteobacteria	Rickettsiales	S25-593	uncultured bacterium	uncultured bacterium	1	0	1	0	0	0	0	0	1	0	0	1	0	0	0	0	0	0	0	0	0	0	0	0
OTU_3077	Bacteria	Proteobacteria	Alphaproteobacteria	Rhizobiales	Xanthobacteraceae	Bradyrhizobium	Unclassified	2	0	0	0	0	0	0	0	0	0	0	0	0	0	0	0	0	0	0	0	0	0	0	0
OTU_3079	Bacteria	Proteobacteria	Gammaproteobacteria	SAR86 clade	uncultured gamma proteobacterium HF4000_19M20	uncultured gamma proteobacterium HF4000_19M20	uncultured gamma proteobacterium HF4000_19M20	0	3	0	0	0	0	0	0	0	0	0	0	0	1	0	0	0	0	0	0	0	0	0	0
OTU_308	Bacteria	Proteobacteria	Alphaproteobacteria	Rickettsiales	SM2D12	uncultured bacterium	uncultured bacterium	0	0	0	1	1	1	0	0	0	0	0	0	0	4	14	1	0	0	0	0	0	0	0	0
OTU_3082	Bacteria	Proteobacteria	Gammaproteobacteria	UBA10353 marine group	uncultured gamma proteobacterium HF0200_24F15	uncultured gamma proteobacterium HF0200_24F15	uncultured gamma proteobacterium HF0200_24F15	0	2	0	0	0	0	0	0	0	0	0	0	0	0	0	0	0	0	0	0	0	0	0	0
OTU_3084	Bacteria	Proteobacteria	Deltaproteobacteria	Bradymonadales	uncultured Geobacteraceae bacterium	uncultured Geobacteraceae bacterium	uncultured Geobacteraceae bacterium	0	3	0	0	0	0	0	0	0	0	0	0	0	0	1	0	0	0	0	0	3	0	0	0
OTU_3085	Bacteria	Proteobacteria	Deltaproteobacteria	Desulfarculales	Desulfarculaceae	uncultured	uncultured delta proteobacterium	0	1	0	0	0	0	0	0	0	0	0	0	0	0	0	0	0	1	0	0	0	0	0	0
OTU_3086	Bacteria	Proteobacteria	Deltaproteobacteria	SAR324 clade(Marine group B)	uncultured SAR324 cluster bacterium	uncultured SAR324 cluster bacterium	uncultured SAR324 cluster bacterium	0	49	0	0	0	0	0	0	0	0	0	0	0	38	0	0	0	0	0	0	0	0	0	0
OTU_3089	Bacteria	Marinimicrobia (SAR406 clade)	uncultured bacterium	uncultured bacterium	uncultured bacterium	uncultured bacterium	uncultured bacterium	0	2	3	0	0	0	0	0	0	0	0	0	0	2	3	0	0	0	0	0	0	0	0	0
OTU_309	Bacteria	Proteobacteria	Gammaproteobacteria	EPR3968-O8a-Bc78	uncultured bacterium	uncultured bacterium	uncultured bacterium	0	0	10	1	4	5	0	0	0	0	0	0	0	0	8	15	4	6	0	0	0	2	0	0
OTU_3090	Bacteria	Lentisphaerae	Oligosphaeria	SS1-B-02-17	uncultured bacterium	uncultured bacterium	uncultured bacterium	0	4	0	0	0	0	0	0	0	0	0	0	0	0	0	0	0	0	0	0	0	0	0	0
OTU_3091	Bacteria	Proteobacteria	Gammaproteobacteria	Alteromonadales	Alteromonadaceae	Alteromonas	Alteromonas australica	0	0	0	3	1	1	0	0	0	9	4	0	0	1	0	0	0	0	0	1	6	1	2	0
OTU_3092	Bacteria	Unclassified	Unclassified	Unclassified	Unclassified	Unclassified	Unclassified	0	0	0	0	0	0	0	0	0	0	0	0	0	0	0	0	0	0	0	0	0	2	0	0
OTU_3094	Bacteria	Proteobacteria	Alphaproteobacteria	Rhizobiales	Beijerinckiaceae	Methylobacterium	Unclassified	0	0	0	0	0	0	0	0	1	0	0	0	0	0	0	0	0	0	1	1	0	0	2	0
OTU_3095	Bacteria	Proteobacteria	Deltaproteobacteria	Bdellovibrionales	Bdellovibrionaceae	OM27 clade	uncultured marine microorganism	0	0	0	0	0	0	0	0	0	0	0	0	0	0	0	0	0	0	0	0	0	0	2	0
OTU_3096	Bacteria	Proteobacteria	Alphaproteobacteria	Rhodobacterales	Rhodobacteraceae	Thiobacimonas	Salipiger nanhaiensis	0	0	0	0	0	0	0	0	0	0	0	0	0	0	0	0	0	1	0	0	0	0	1	0
OTU_3098	Bacteria	Proteobacteria	Gammaproteobacteria	Betaproteobacteriales	Burkholderiaceae	Parapusillimonas	uncultured bacterium	0	0	0	0	0	0	0	0	1	0	0	0	0	0	0	0	0	0	0	0	0	0	2	0
OTU_3099	Bacteria	Firmicutes	Bacilli	Bacillales	Planococcaceae	Planococcus	uncultured bacterium	0	0	0	0	0	0	0	0	0	0	0	0	0	0	0	0	0	0	0	0	0	0	5	0
OTU_31	Bacteria	Proteobacteria	Alphaproteobacteria	Rhodobacterales	Rhodobacteraceae	Paracoccus	uncultured bacterium	0	0	0	18	6	3	0	0	1	22	11	224	0	0	0	3	8	11	13	0	135	25	76	0
OTU_310	Bacteria	Actinobacteria	Actinobacteria	Corynebacteriales	Nocardiaceae	Rhodococcus	Rhodococcus sp.	0	0	0	0	0	0	0	0	0	0	0	0	0	0	0	0	0	0	0	0	4	0	37	0
OTU_3102	Bacteria	Marinimicrobia (SAR406 clade)	Marinimicrobia bacterium SCGC AAA003-E22	Marinimicrobia bacterium SCGC AAA003-E22	Marinimicrobia bacterium SCGC AAA003-E22	Marinimicrobia bacterium SCGC AAA003-E22	Marinimicrobia bacterium SCGC AAA003-E22	0	5	0	0	1	0	0	0	0	0	0	0	0	1	0	0	0	0	0	0	0	0	0	0
OTU_3103	Bacteria	Cyanobacteria	Oxyphotobacteria	Synechococcales	Cyanobiaceae	Prochlorococcus MIT9313	marine metagenome	2	0	0	0	0	0	0	0	0	0	0	0	0	0	0	0	0	0	0	0	0	0	0	0
OTU_3104	Bacteria	Marinimicrobia (SAR406 clade)	marine metagenome	marine metagenome	marine metagenome	marine metagenome	marine metagenome	0	11	2	0	0	0	0	1	0	0	0	0	0	3	0	2	0	0	0	1	0	0	0	0
OTU_3105	Bacteria	Proteobacteria	Gammaproteobacteria	SAR86 clade	uncultured SAR86 cluster bacterium	uncultured SAR86 cluster bacterium	uncultured SAR86 cluster bacterium	6	0	0	0	0	0	0	0	0	0	0	0	0	0	0	0	0	0	0	0	0	0	0	0
OTU_3106	Bacteria	Marinimicrobia (SAR406 clade)	uncultured marine bacterium	uncultured marine bacterium	uncultured marine bacterium	uncultured marine bacterium	uncultured marine bacterium	10	0	4	0	1	0	0	0	0	0	0	0	0	0	6	0	0	0	0	1	0	0	15	0
OTU_3107	Bacteria	Proteobacteria	Gammaproteobacteria	UBA10353 marine group	uncultured marine microorganism	uncultured marine microorganism	uncultured marine microorganism	0	2	0	0	0	0	0	0	0	0	0	0	0	0	0	0	0	0	0	0	0	0	0	0
OTU_3108	Bacteria	Gemmatimonadetes	BD2-11 terrestrial group	uncultured Gemmatimonadetes bacterium	uncultured Gemmatimonadetes bacterium	uncultured Gemmatimonadetes bacterium	uncultured Gemmatimonadetes bacterium	0	7	0	0	0	0	0	0	0	0	0	0	0	4	0	0	0	0	0	0	0	0	0	0
OTU_311	Bacteria	Proteobacteria	Alphaproteobacteria	Sphingomonadales	Sphingomonadaceae	Altererythrobacter	uncultured bacterium	0	0	1	5	26	1	1	0	0	1	4	2	2	0	1	18	17	2	4	2	10	5	1	20
OTU_3110	Bacteria	Actinobacteria	Acidimicrobiia	Microtrichales	Microtrichaceae	Sva0996 marine group	uncultured bacterium AD12-A11	0	6	2	0	0	0	0	0	0	0	0	0	0	5	1	0	0	0	0	0	0	0	0	0
OTU_3113	Bacteria	Actinobacteria	Actinobacteria	Micrococcales	Brevibacteriaceae	Brevibacterium	Brevibacterium epidermidis	0	2	0	0	0	0	0	0	0	0	0	0	0	0	0	0	0	0	0	0	0	0	0	0
OTU_3115	Bacteria	Proteobacteria	Alphaproteobacteria	SAR11 clade	Clade I	Clade Ia	Unclassified	4	0	1	0	0	1	0	1	0	0	0	0	3	1	0	0	0	1	2	0	0	0	0	0
OTU_3116	Bacteria	Actinobacteria	Acidimicrobiia	Actinomarinales	Actinomarinaceae	Candidatus Actinomarina	uncultured bacterium	1	0	0	0	0	0	1	0	0	0	0	0	1	0	0	0	0	0	0	0	0	0	0	0
OTU_3118	Bacteria	Cyanobacteria	Oxyphotobacteria	Synechococcales	Cyanobiaceae	Synechococcus CC9902	uncultured cyanobacterium	0	0	0	0	0	0	0	0	0	0	0	0	3	0	1	0	0	0	0	0	0	0	0	0
OTU_3122	Bacteria	Fibrobacteres	Fibrobacteria	Fibrobacterales	Fibrobacteraceae	uncultured	uncultured deep-sea bacterium	0	0	0	0	0	0	0	0	0	0	0	4	0	0	0	0	0	0	0	0	0	0	0	0
OTU_3123	Bacteria	Proteobacteria	Alphaproteobacteria	Sphingomonadales	Sphingomonadaceae	Unclassified	Unclassified	0	0	0	1	0	0	1	0	0	0	0	2	0	0	0	0	0	1	0	0	0	0	0	0
OTU_3124	Bacteria	Patescibacteria	Saccharimonadia	Saccharimonadales	Unclassified	Unclassified	Unclassified	0	0	0	0	0	0	0	0	0	2	0	0	0	0	0	0	0	0	0	0	0	0	0	0
OTU_3125	Bacteria	Proteobacteria	Gammaproteobacteria	Alteromonadales	Alteromonadaceae	Alteromonas	Alteromonas australica	0	0	0	0	0	0	0	0	0	2	1	0	0	0	0	0	0	0	0	0	0	0	0	0
OTU_3127	Bacteria	Proteobacteria	Gammaproteobacteria	P0X4b2H11	uncultured bacterium	uncultured bacterium	uncultured bacterium	0	0	0	0	1	0	0	0	8	0	2	0	0	0	0	0	0	0	0	0	0	0	1	0
OTU_3129	Bacteria	Proteobacteria	Gammaproteobacteria	Oceanospirillales	Halomonadaceae	Halomonas	Unclassified	0	0	0	0	0	0	0	0	2	0	0	0	0	0	0	0	0	0	0	0	0	0	0	0
OTU_313	Bacteria	Proteobacteria	Deltaproteobacteria	Bradymonadales	unidentified marine bacterioplankton	unidentified marine bacterioplankton	unidentified marine bacterioplankton	0	0	0	1	16	56	0	0	0	0	0	7	0	0	5	0	0	0	0	0	0	0	0	3
OTU_3130	Bacteria	Chloroflexi	TK10	Unclassified	Unclassified	Unclassified	Unclassified	0	0	0	0	0	0	0	0	2	0	0	0	0	0	0	0	0	0	0	0	0	0	0	0
OTU_3131	Bacteria	Chloroflexi	Dehalococcoidia	Unclassified	Unclassified	Unclassified	Unclassified	0	0	0	0	0	3	0	0	0	0	0	0	0	0	0	0	0	0	0	0	0	0	0	0
OTU_3132	Bacteria	Proteobacteria	Alphaproteobacteria	SAR11 clade	Clade I	uncultured	Unclassified	0	11	3	1	3	3	0	0	3	0	0	0	0	1	8	1	0	5	0	0	0	2	1	0
OTU_3133	Bacteria	Chloroflexi	JG30-KF-CM66	uncultured bacterium	uncultured bacterium	uncultured bacterium	uncultured bacterium	0	0	0	0	2	0	0	0	0	0	0	0	0	0	0	0	0	0	0	0	0	0	0	0
OTU_3134	Bacteria	Proteobacteria	Deltaproteobacteria	Bdellovibrionales	Bacteriovoracaceae	Peredibacter	Unclassified	0	0	0	0	2	0	0	0	0	0	0	0	0	0	0	0	0	1	0	0	0	0	0	0
OTU_3135	Bacteria	Planctomycetes	BD7-11	uncultured planctomycete	uncultured planctomycete	uncultured planctomycete	uncultured planctomycete	0	0	0	0	0	4	0	0	0	0	0	0	0	0	0	0	0	0	0	0	0	0	0	0
OTU_3136	Bacteria	Actinobacteria	Acidimicrobiia	IMCC26256	uncultured bacterium	uncultured bacterium	uncultured bacterium	0	0	0	0	0	0	0	0	0	3	0	0	0	0	0	0	0	0	0	0	0	0	0	0
OTU_3137	Bacteria	Firmicutes	Bacilli	Lactobacillales	Streptococcaceae	Streptococcus	uncultured bacterium	0	0	0	0	0	0	0	0	0	4	0	0	0	0	0	0	0	0	0	0	0	0	0	0
OTU_3138	Bacteria	Kiritimatiellaeota	Kiritimatiellae	WCHB1-41	Unclassified	Unclassified	Unclassified	0	0	0	0	1	0	0	0	0	2	0	0	0	0	0	0	0	0	0	0	2	4	3	0
OTU_314	Bacteria	Chloroflexi	N9D0	marine metagenome	marine metagenome	marine metagenome	marine metagenome	0	4	17	1	4	6	0	0	12	1	0	0	0	4	7	6	3	5	0	0	0	1	3	0
OTU_3142	Bacteria	Planctomycetes	OM190	uncultured bacterium	uncultured bacterium	uncultured bacterium	uncultured bacterium	0	0	0	0	0	0	0	0	0	0	0	1	0	0	0	0	0	0	0	0	0	0	0	1
OTU_3143	Bacteria	Proteobacteria	Alphaproteobacteria	Rhodobacterales	Rhodobacteraceae	uncultured	Rhodobacter sp. R18	0	0	0	0	0	0	0	0	0	0	2	0	0	0	0	0	0	0	0	0	0	0	0	0
OTU_3145	Bacteria	Marinimicrobia (SAR406 clade)	uncultured bacterium	uncultured bacterium	uncultured bacterium	uncultured bacterium	uncultured bacterium	0	5	4	0	0	1	0	0	0	0	0	0	0	2	2	0	0	0	0	0	0	0	1	0
OTU_3146	Bacteria	Gemmatimonadetes	BD2-11 terrestrial group	uncultured bacterium	uncultured bacterium	uncultured bacterium	uncultured bacterium	0	0	13	1	3	8	0	0	0	0	0	0	0	0	7	5	3	9	0	0	0	0	0	0
OTU_3147	Bacteria	Gemmatimonadetes	BD2-11 terrestrial group	uncultured Gemmatimonadetes bacterium	uncultured Gemmatimonadetes bacterium	uncultured Gemmatimonadetes bacterium	uncultured Gemmatimonadetes bacterium	0	0	0	2	1	5	0	0	2	0	0	0	0	0	2	6	0	3	0	0	0	0	0	0
OTU_3148	Bacteria	Unclassified	Unclassified	Unclassified	Unclassified	Unclassified	Unclassified	0	0	0	1	0	0	0	0	0	0	0	0	0	0	1	0	0	0	0	0	0	0	0	0
OTU_3149	Bacteria	Proteobacteria	Alphaproteobacteria	Rhodobacterales	Rhodobacteraceae	Unclassified	Unclassified	0	0	0	7	0	0	0	0	0	2	0	0	0	0	0	0	0	0	0	1	0	0	0	0
OTU_315	Bacteria	Proteobacteria	Deltaproteobacteria	Bdellovibrionales	Bdellovibrionaceae	OM27 clade	uncultured delta proteobacterium	0	7	1	1	0	3	0	10	6	0	0	0	0	2	2	0	0	0	6	0	26	4	4	0
OTU_3150	Bacteria	Proteobacteria	Alphaproteobacteria	Micavibrionales	Micavibrionaceae	uncultured	uncultured bacterium	0	0	0	0	0	2	0	0	0	0	0	0	0	0	0	0	0	0	0	0	0	0	0	0
OTU_3151	Bacteria	Proteobacteria	Unclassified	Unclassified	Unclassified	Unclassified	Unclassified	0	0	0	0	0	2	0	0	0	0	0	0	0	0	0	0	0	0	0	0	0	0	0	0
OTU_3152	Bacteria	Bacteroidetes	Bacteroidia	Flavobacteriales	Flavobacteriaceae	uncultured	uncultured deep-sea bacterium	0	0	0	0	0	1	0	0	0	0	0	0	0	0	0	0	0	1	0	0	0	0	0	0
OTU_3154	Bacteria	Bacteroidetes	Bacteroidia	Bacteroidales	Bacteroidaceae	Bacteroides	Bacteroides dorei	0	0	0	0	0	0	0	0	0	4	0	0	0	0	0	0	0	0	0	0	0	0	0	0
OTU_3156	Bacteria	Proteobacteria	Gammaproteobacteria	Alteromonadales	Pseudoalteromonadaceae	Pseudoalteromonas	Unclassified	0	0	0	0	0	0	0	2	0	0	0	0	0	0	0	0	0	0	0	0	0	0	0	0
OTU_3158	Bacteria	Patescibacteria	Parcubacteria	Candidatus Kaiserbacteria	uncultured bacterium	uncultured bacterium	uncultured bacterium	0	0	0	0	0	8	0	0	0	0	0	0	0	0	0	0	0	0	0	0	0	0	0	0
OTU_3159	Bacteria	Proteobacteria	Deltaproteobacteria	NB1-j	uncultured bacterium	uncultured bacterium	uncultured bacterium	0	0	2	0	0	0	0	0	1	0	0	0	0	0	0	0	0	0	0	0	7	0	0	0
OTU_316	Bacteria	Proteobacteria	Alphaproteobacteria	uncultured	uncultured proteobacterium	uncultured proteobacterium	uncultured proteobacterium	0	24	33	2	6	4	0	0	0	0	0	0	0	6	5	4	4	10	0	0	0	0	2	0
OTU_3161	Bacteria	Planctomycetes	Planctomycetacia	Planctomycetales	uncultured	uncultured bacterium	uncultured bacterium	0	0	0	0	0	0	0	0	0	0	0	0	0	0	0	0	0	2	0	0	0	0	0	0
OTU_3163	Bacteria	Proteobacteria	Gammaproteobacteria	Alteromonadales	Alteromonadaceae	Alteromonas	Alteromonas australica	0	0	0	0	0	0	0	0	0	0	0	0	0	0	0	0	0	0	0	0	2	0	0	0
OTU_3164	Bacteria	Proteobacteria	Deltaproteobacteria	PB19	uncultured delta proteobacterium DeepAnt-1F12	uncultured delta proteobacterium DeepAnt-1F12	uncultured delta proteobacterium DeepAnt-1F12	0	0	0	0	0	0	0	2	2	0	0	0	0	0	0	0	0	0	0	0	1	0	0	0
OTU_3165	Bacteria	Proteobacteria	Deltaproteobacteria	DTB120	uncultured bacterium	uncultured bacterium	uncultured bacterium	0	0	0	0	0	0	0	0	0	0	0	0	0	0	0	0	0	0	0	0	3	0	0	0
OTU_3166	Bacteria	Acidobacteria	Subgroup 21	uncultured bacterium	uncultured bacterium	uncultured bacterium	uncultured bacterium	0	0	0	2	3	2	0	0	0	0	0	0	0	0	0	0	1	2	0	0	0	0	0	0
OTU_3167	Bacteria	Bacteroidetes	Bacteroidia	Cytophagales	Cyclobacteriaceae	uncultured	Unclassified	0	0	0	0	0	0	0	0	0	0	0	0	0	0	0	0	0	4	0	0	0	0	0	0
OTU_3168	Bacteria	Proteobacteria	Alphaproteobacteria	Unclassified	Unclassified	Unclassified	Unclassified	0	0	0	0	0	0	0	0	0	0	0	0	0	0	0	0	0	3	0	0	0	0	0	0
OTU_3169	Bacteria	Chloroflexi	Dehalococcoidia	SAR202 clade	uncultured bacterium	uncultured bacterium	uncultured bacterium	1	2	0	0	0	1	0	0	0	0	0	0	0	1	1	2	0	2	0	1	0	1	0	0
OTU_317	Bacteria	Proteobacteria	Alphaproteobacteria	uncultured	unidentified marine bacterioplankton	unidentified marine bacterioplankton	unidentified marine bacterioplankton	32	0	1	0	2	0	5	1	0	0	0	0	10	8	0	2	0	1	18	0	0	2	3	0
OTU_3171	Bacteria	Proteobacteria	Deltaproteobacteria	Bdellovibrionales	Bdellovibrionaceae	OM27 clade	uncultured organism	0	0	0	0	0	0	0	0	0	0	0	0	1	0	0	0	0	0	1	0	0	0	0	0
OTU_3172	Bacteria	Proteobacteria	Alphaproteobacteria	SAR11 clade	Clade II	Unclassified	Unclassified	0	0	6	0	1	6	0	0	2	0	0	0	0	0	6	1	2	0	0	0	2	6	1	0
OTU_3175	Bacteria	Proteobacteria	Gammaproteobacteria	Coxiellales	Coxiellaceae	Coxiella	uncultured marine bacterium	0	0	1	0	0	0	1	0	0	0	0	0	0	0	0	0	2	1	0	0	0	0	0	0
OTU_3176	Bacteria	Acidobacteria	Subgroup 11	uncultured bacterium KM3-18-F8	uncultured bacterium KM3-18-F8	uncultured bacterium KM3-18-F8	uncultured bacterium KM3-18-F8	0	2	0	0	0	0	0	0	0	0	0	0	0	2	0	0	0	0	0	0	0	0	0	0
OTU_3177	Bacteria	Proteobacteria	Deltaproteobacteria	SAR324 clade(Marine group B)	Unclassified	Unclassified	Unclassified	0	1	0	0	0	0	0	0	0	0	0	0	0	1	0	0	0	0	0	0	0	0	0	0
OTU_3178	Bacteria	Actinobacteria	Acidimicrobiia	Actinomarinales	Actinomarinaceae	Candidatus Actinomarina	Unclassified	1	0	0	0	0	0	2	0	0	0	0	0	0	1	0	0	0	0	0	0	0	0	0	0
OTU_3179	Bacteria	Cyanobacteria	Oxyphotobacteria	Synechococcales	Cyanobiaceae	Prochlorococcus MIT9313	marine metagenome	0	4	0	0	0	0	0	0	0	0	0	0	0	6	0	0	0	0	0	0	0	0	0	0
OTU_318	Bacteria	Chloroflexi	Dehalococcoidia	SAR202 clade	uncultured deep-sea bacterium	uncultured deep-sea bacterium	uncultured deep-sea bacterium	1	6	19	3	5	14	0	0	6	0	0	0	0	14	24	3	14	18	0	0	7	0	0	0
OTU_3180	Bacteria	Marinimicrobia (SAR406 clade)	uncultured bacterium	uncultured bacterium	uncultured bacterium	uncultured bacterium	uncultured bacterium	0	0	3	0	0	0	0	0	0	0	0	0	0	0	0	0	0	0	0	0	0	0	0	0
OTU_3184	Bacteria	Proteobacteria	Deltaproteobacteria	Myxococcales	P3OB-42	uncultured bacterium	uncultured bacterium	0	0	0	0	0	0	0	1	0	0	0	0	0	1	0	0	0	0	0	1	1	0	0	0
OTU_3186	Bacteria	Chloroflexi	N9D0	marine metagenome	marine metagenome	marine metagenome	marine metagenome	0	3	0	0	0	0	0	0	0	0	0	0	0	8	1	0	0	0	0	0	0	0	0	0
OTU_3187	Bacteria	Proteobacteria	Alphaproteobacteria	SAR11 clade	Clade II	uncultured Pelagibacterales bacterium	uncultured Pelagibacterales bacterium	0	25	14	2	5	4	0	0	11	0	3	0	0	19	16	1	2	13	0	0	3	2	13	0
OTU_3189	Bacteria	Proteobacteria	Deltaproteobacteria	Myxococcales	P3OB-42	uncultured bacterium	uncultured bacterium	0	0	0	1	0	0	0	0	0	0	0	0	0	4	1	0	0	0	0	0	0	0	0	0
OTU_319	Bacteria	Proteobacteria	Alphaproteobacteria	SAR11 clade	Clade II	uncultured bacterium	uncultured bacterium	0	63	15	3	12	0	0	0	9	0	0	5	0	20	33	0	1	0	0	3	16	1	0	0
OTU_3190	Bacteria	Actinobacteria	Actinobacteria	Corynebacteriales	Mycobacteriaceae	Mycobacterium	Mycobacterium sp. JC422	0	0	1	0	2	1	0	0	1	0	0	0	0	1	0	0	1	0	0	5	0	0	0	0
OTU_3194	Bacteria	Planctomycetes	BD7-11	uncultured Planctomycetales bacterium	uncultured Planctomycetales bacterium	uncultured Planctomycetales bacterium	uncultured Planctomycetales bacterium	0	0	0	0	0	0	0	0	2	0	0	0	0	0	2	0	0	0	0	2	3	2	1	0
OTU_3195	Bacteria	Proteobacteria	Gammaproteobacteria	Alteromonadales	Idiomarinaceae	Idiomarina	Idiomarina sp. B2	0	0	0	1	0	0	0	0	0	0	0	0	0	0	0	0	0	0	0	10	0	0	0	0
OTU_3198	Bacteria	Cyanobacteria	Oxyphotobacteria	Synechococcales	Cyanobiaceae	Cyanobium PCC-6307	uncultured bacterium	0	0	0	0	0	1	1	4	0	0	0	0	12	0	0	0	0	0	2	1	0	0	0	0
OTU_32	Bacteria	Bacteroidetes	Bacteroidia	Flavobacteriales	Flavobacteriaceae	Muricauda	Bacteroidetes bacterium GMDsbC3	46	7	10	34	65	9	0	22	78	9	3	10	1	15	2	32	176	5	32	508	15	74	15	1
OTU_320	Bacteria	Proteobacteria	Alphaproteobacteria	Sphingomonadales	Sphingomonadaceae	Unclassified	Unclassified	0	0	1	1	5	0	0	0	3	0	0	1	0	0	0	0	0	1	0	14	0	0	0	0
OTU_3201	Bacteria	Proteobacteria	Gammaproteobacteria	Oceanospirillales	Halomonadaceae	Halomonas	uncultured organism	0	0	0	2	0	0	0	0	0	0	0	0	0	0	0	0	0	0	0	0	0	0	0	0
OTU_3203	Bacteria	Proteobacteria	Alphaproteobacteria	Rhodobacterales	Rhodobacteraceae	Ketogulonicigenium	uncultured bacterium	2	0	2	11	20	10	0	0	20	0	7	12	0	18	6	108	36	12	0	7	0	0	2	0
OTU_3206	Bacteria	Bacteroidetes	Bacteroidia	Flavobacteriales	Flavobacteriaceae	Polaribacter 4	uncultured bacterium	0	0	0	0	0	1	0	0	0	0	0	0	0	0	0	0	0	0	9	0	0	0	0	0
OTU_3209	Bacteria	Planctomycetes	Planctomycetacia	Planctomycetales	Rubinisphaeraceae	uncultured	uncultured Planctomycetaceae bacterium	0	0	0	0	0	0	0	0	0	0	0	0	0	0	0	0	0	0	0	2	0	0	0	0
OTU_321	Bacteria	Bacteroidetes	Bacteroidia	Chitinophagales	Saprospiraceae	uncultured	uncultured marine microorganism	0	0	0	0	0	0	0	5	0	0	0	0	0	0	0	0	0	0	20	0	0	0	7	0
OTU_3211	Bacteria	Bacteroidetes	Bacteroidia	Flavobacteriales	Cryomorphaceae	Phaeocystidibacter	uncultured Bacteroidetes bacterium	0	0	0	0	0	0	0	0	0	0	0	0	0	0	0	0	0	0	4	0	0	0	0	0
OTU_3213	Bacteria	Bacteroidetes	Bacteroidia	Flavobacteriales	Flavobacteriaceae	Salinimicrobium	uncultured Salinimicrobium sp.	0	0	0	0	0	0	0	0	0	0	0	0	0	0	0	0	0	0	2	1	0	0	0	0
OTU_3215	Bacteria	Bacteroidetes	Bacteroidia	Flavobacteriales	Flavobacteriaceae	uncultured	uncultured Flavobacteriales bacterium	0	0	1	0	0	0	0	0	0	0	0	0	0	0	0	0	0	0	4	0	0	0	0	0
OTU_3217	Bacteria	Proteobacteria	Gammaproteobacteria	SAR86 clade	marine metagenome	marine metagenome	marine metagenome	3	0	0	0	0	2	0	0	0	0	0	0	0	0	0	0	0	0	0	0	0	0	0	0
OTU_3218	Bacteria	Proteobacteria	Gammaproteobacteria	Oceanospirillales	Nitrincolaceae	uncultured	uncultured bacterium	0	0	0	0	0	2	0	0	0	0	0	0	0	0	0	0	0	0	0	0	0	0	0	0
OTU_322	Bacteria	Marinimicrobia (SAR406 clade)	uncultured bacterium	uncultured bacterium	uncultured bacterium	uncultured bacterium	uncultured bacterium	192	6	0	0	0	0	4	3	0	0	0	5	7	4	0	0	0	0	1	0	0	0	20	0
OTU_3223	Bacteria	Verrucomicrobia	Verrucomicrobiae	Opitutales	Puniceicoccaceae	Pelagicoccus	uncultured bacterium	0	0	0	0	0	1	0	1	0	0	0	0	0	0	0	0	0	0	0	0	0	0	0	0
OTU_3226	Bacteria	Actinobacteria	Acidimicrobiia	Microtrichales	Microtrichaceae	Sva0996 marine group	uncultured bacterium	0	0	0	0	0	2	0	0	0	0	0	1	5	0	0	0	0	0	0	0	0	0	0	0
OTU_3227	Bacteria	Planctomycetes	Phycisphaerae	Phycisphaerales	Phycisphaeraceae	SM1A02	Unclassified	0	0	0	0	0	0	0	0	0	0	0	0	0	0	0	0	0	0	0	0	2	0	0	0
OTU_3228	Bacteria	Bacteroidetes	Bacteroidia	Flavobacteriales	Flavobacteriaceae	Subsaxibacter	Gelidibacter sp. ZS2-2	0	0	0	0	0	0	0	0	0	0	0	0	0	0	0	0	1	0	0	0	1	0	0	0
OTU_323	Bacteria	Proteobacteria	Gammaproteobacteria	Betaproteobacteriales	Burkholderiaceae	Curvibacter	uncultured bacterium	0	0	0	0	0	0	0	0	0	0	0	0	0	0	0	0	0	0	0	0	0	39	0	0
OTU_3231	Bacteria	Verrucomicrobia	Verrucomicrobiae	Opitutales	Puniceicoccaceae	MB11C04 marine group	uncultured marine microorganism	0	0	2	0	0	1	0	0	0	0	0	0	0	1	1	0	0	0	0	0	0	0	0	0
OTU_3232	Bacteria	Firmicutes	Clostridia	Clostridiales	Family XII	Unclassified	Unclassified	0	0	6	0	0	0	0	0	0	0	0	0	0	0	0	0	0	0	0	0	0	0	0	0
OTU_3237	Bacteria	Proteobacteria	Alphaproteobacteria	Micavibrionales	Micavibrionaceae	uncultured	hydrothermal vent metagenome	0	0	2	0	0	0	0	0	0	0	0	0	0	0	0	0	0	0	0	0	0	0	0	0
OTU_3238	Bacteria	Chloroflexi	Dehalococcoidia	SAR202 clade	uncultured deep-sea bacterium	uncultured deep-sea bacterium	uncultured deep-sea bacterium	0	0	1	0	0	0	0	0	1	0	0	0	0	0	0	0	0	0	0	0	0	0	0	0
OTU_324	Bacteria	Marinimicrobia (SAR406 clade)	Marinimicrobia bacterium SCGC AAA003-E22	Marinimicrobia bacterium SCGC AAA003-E22	Marinimicrobia bacterium SCGC AAA003-E22	Marinimicrobia bacterium SCGC AAA003-E22	Marinimicrobia bacterium SCGC AAA003-E22	0	44	154	16	56	152	0	1	48	1	0	2	0	22	139	47	75	165	0	0	1	19	18	0
OTU_3241	Bacteria	Proteobacteria	Gammaproteobacteria	HOC36	uncultured bacterium HF0770_27E13	uncultured bacterium HF0770_27E13	uncultured bacterium HF0770_27E13	0	0	5	0	0	3	0	0	0	0	0	0	0	0	3	0	3	1	0	0	0	0	0	0
OTU_3242	Bacteria	Proteobacteria	Alphaproteobacteria	SAR11 clade	Clade I	uncultured	uncultured bacterium	0	0	1	0	0	0	0	0	0	0	0	0	0	4	0	0	0	0	0	0	0	0	0	0
OTU_3244	Bacteria	Proteobacteria	Gammaproteobacteria	Alteromonadales	Alteromonadaceae	Salinimonas	Salinimonas lutimaris	0	0	0	0	2	0	0	0	0	0	1	0	0	0	0	0	0	0	0	0	5	1	1	0
OTU_3245	Bacteria	Actinobacteria	Actinobacteria	Corynebacteriales	Corynebacteriaceae	Corynebacterium 1	uncultured bacterium	0	0	2	0	0	1	1	8	10	5	0	1	0	0	0	0	0	0	0	0	0	20	0	0
[truncated: 2,339 more rows]

## Sheet: Singletons of Bacterial OTUs
OTUId	Domain	Phylum	Class	Order	Family	Genus	Species	G3F50	G3F200	G3F1000	G3F2000	G3F3000	G3F4000	G3P50	G3P200	G3P1000	G3P2000	G3P3000	G3P4000	J5F50	J5F200	J5F1000	J5F2000	J5F3000	J5F4000	J5P50	J5P200	J5P1000	J5P3000	J5P4000	J5P2000
OTU_2054	Bacteria	Planctomycetes	Planctomycetacia	Pirellulales	Pirellulaceae	Blastopirellula	uncultured bacterium	0	0	0	0	0	0	0	0	0	0	0	0	1	0	0	0	0	0	0	0	0	0	0	0
OTU_2056	Bacteria	Chloroflexi	Dehalococcoidia	SAR202 clade	marine metagenome	marine metagenome	marine metagenome	0	0	0	0	0	0	0	0	0	0	0	0	1	0	0	0	0	0	0	0	0	0	0	0
OTU_2065	Bacteria	Proteobacteria	Gammaproteobacteria	Alteromonadales	Idiomarinaceae	Idiomarina	Unclassified	0	0	0	0	0	0	0	0	0	0	0	0	0	1	0	0	0	0	0	0	0	0	0	0
OTU_2066	Bacteria	Proteobacteria	Deltaproteobacteria	Oligoflexales	Oligoflexaceae	uncultured	uncultured bacterium	0	0	0	0	0	0	0	0	0	0	0	0	0	1	0	0	0	0	0	0	0	0	0	0
OTU_2070	Bacteria	Actinobacteria	Acidimicrobiia	Actinomarinales	Actinomarinaceae	Candidatus Actinomarina	Candidatus Actinomarina minuta	0	0	0	0	0	0	0	0	0	0	0	0	1	0	0	0	0	0	0	0	0	0	0	0
OTU_2071	Bacteria	Chloroflexi	Dehalococcoidia	SAR202 clade	hydrothermal vent metagenome	hydrothermal vent metagenome	hydrothermal vent metagenome	0	0	0	0	0	0	0	0	0	0	0	0	0	1	0	0	0	0	0	0	0	0	0	0
OTU_2072	Bacteria	Proteobacteria	Alphaproteobacteria	Rhizobiales	Methyloligellaceae	uncultured	Methyloceanibacter sp.	0	0	0	0	0	0	0	0	0	0	0	0	0	1	0	0	0	0	0	0	0	0	0	0
OTU_2075	Bacteria	Proteobacteria	Alphaproteobacteria	Rhizobiales	Rhizobiaceae	Unclassified	Unclassified	0	0	0	0	0	0	0	0	0	0	0	0	0	0	0	0	0	0	0	0	0	0	0	1
OTU_2086	Bacteria	Actinobacteria	Acidimicrobiia	Actinomarinales	Actinomarinaceae	Candidatus Actinomarina	Unclassified	1	0	0	0	0	0	0	0	0	0	0	0	0	0	0	0	0	0	0	0	0	0	0	0
OTU_2091	Bacteria	Actinobacteria	Acidimicrobiia	Actinomarinales	Actinomarinaceae	Candidatus Actinomarina	Unclassified	1	0	0	0	0	0	0	0	0	0	0	0	0	0	0	0	0	0	0	0	0	0	0	0
OTU_2092	Bacteria	Proteobacteria	Alphaproteobacteria	Rhodospirillales	Magnetospiraceae	uncultured	uncultured marine microorganism	0	1	0	0	0	0	0	0	0	0	0	0	0	0	0	0	0	0	0	0	0	0	0	0
OTU_2093	Bacteria	Nitrospirae	Nitrospira	Nitrospirales	Nitrospiraceae	Nitrospira	uncultured bacterium	0	0	0	0	0	0	0	0	0	0	0	0	0	1	0	0	0	0	0	0	0	0	0	0
OTU_2095	Bacteria	Planctomycetes	Planctomycetacia	Pirellulales	Pirellulaceae	Blastopirellula	Pirellula sp.	0	0	0	0	0	0	0	0	0	0	0	0	0	0	0	0	1	0	0	0	0	0	0	0
OTU_2098	Bacteria	Unclassified	Unclassified	Unclassified	Unclassified	Unclassified	Unclassified	0	0	0	0	0	0	0	0	0	0	0	0	0	0	0	0	1	0	0	0	0	0	0	0
OTU_2099	Bacteria	Verrucomicrobia	Verrucomicrobiae	Opitutales	Puniceicoccaceae	MB11C04 marine group	uncultured bacterium	0	0	0	0	0	0	0	0	0	0	0	0	0	0	0	0	1	0	0	0	0	0	0	0
OTU_2101	Bacteria	Firmicutes	Clostridia	Clostridiales	Family XIII	S5-A14a	Clostridiales bacterium S5-A14a	0	0	0	0	0	0	0	0	0	0	0	0	0	0	0	1	0	0	0	0	0	0	0	0
OTU_2102	Bacteria	Proteobacteria	Gammaproteobacteria	Coxiellales	Coxiellaceae	Coxiella	Unclassified	0	0	0	0	0	0	0	0	0	0	0	0	0	0	0	0	1	0	0	0	0	0	0	0
OTU_2106	Bacteria	Proteobacteria	Gammaproteobacteria	Alteromonadales	Alteromonadaceae	Unclassified	Unclassified	0	0	0	0	0	0	0	0	0	0	0	1	0	0	0	0	0	0	0	0	0	0	0	0
OTU_2108	Bacteria	Proteobacteria	Gammaproteobacteria	Legionellales	Legionellaceae	Legionella	Unclassified	0	0	0	0	0	0	0	0	0	0	0	0	0	0	0	0	0	1	0	0	0	0	0	0
OTU_2114	Bacteria	Proteobacteria	Deltaproteobacteria	Oligoflexales	Oligoflexaceae	uncultured	uncultured bacterium	0	0	0	0	0	0	0	0	0	0	0	0	0	0	0	0	0	0	1	0	0	0	0	0
OTU_2118	Bacteria	Firmicutes	Bacilli	Bacillales	Paenibacillaceae	Paenibacillus	Paenibacillus barengoltzii	0	0	0	0	0	0	0	0	0	0	0	0	0	0	0	1	0	0	0	0	0	0	0	0
OTU_2122	Bacteria	Chloroflexi	Dehalococcoidia	SAR202 clade	uncultured bacterium	uncultured bacterium	uncultured bacterium	0	0	0	0	0	0	0	0	0	0	0	0	0	0	0	1	0	0	0	0	0	0	0	0
OTU_2128	Bacteria	Nitrospinae	Nitrospinia	Nitrospinales	Nitrospinaceae	LS-NOB	uncultured marine microorganism	0	0	0	0	0	0	0	0	0	0	0	0	0	1	0	0	0	0	0	0	0	0	0	0
OTU_2133	Bacteria	Proteobacteria	Gammaproteobacteria	Alteromonadales	Alteromonadaceae	Alteromonas	Alteromonas australica	0	0	0	0	0	0	0	0	0	1	0	0	0	0	0	0	0	0	0	0	0	0	0	0
OTU_2140	Bacteria	Proteobacteria	Gammaproteobacteria	Alteromonadales	Alteromonadaceae	Alteromonas	Unclassified	0	0	0	0	0	0	0	0	0	0	0	0	0	0	0	0	0	0	0	0	1	0	0	0
OTU_2142	Bacteria	Proteobacteria	Gammaproteobacteria	Alteromonadales	Marinobacteraceae	Marinobacter	Unclassified	0	0	0	0	0	0	0	0	0	0	0	0	0	0	0	0	0	0	0	0	1	0	0	0
OTU_2146	Bacteria	Proteobacteria	Deltaproteobacteria	Bradymonadales	Unclassified	Unclassified	Unclassified	0	0	0	0	0	0	0	0	0	0	0	0	0	0	0	0	0	0	0	0	0	1	0	0
OTU_2154	Bacteria	Proteobacteria	Deltaproteobacteria	PB19	Unclassified	Unclassified	Unclassified	0	0	0	0	0	0	0	0	0	0	0	0	0	0	0	0	0	0	0	0	0	0	1	0
OTU_2155	Bacteria	Bacteroidetes	Bacteroidia	Cytophagales	Hymenobacteraceae	Hymenobacter	Hymenobacter sp. MIC2001	0	0	0	0	0	0	0	0	0	0	0	0	0	0	0	0	0	0	0	0	0	0	1	0
OTU_2157	Bacteria	Firmicutes	Clostridia	Clostridiales	Family XI	Tissierella	Tissierella praeacuta	0	0	0	0	0	0	0	0	0	0	0	0	0	0	0	0	0	0	0	0	0	0	1	0
OTU_2160	Bacteria	Proteobacteria	Alphaproteobacteria	SAR11 clade	Clade I	Unclassified	Unclassified	0	0	0	0	0	0	0	0	0	0	0	0	0	0	0	0	0	0	0	0	0	0	1	0
OTU_2163	Bacteria	Bacteroidetes	Bacteroidia	Bacteroidales	Bacteroidaceae	Bacteroides	Bacteroides uniformis CL03T12C37	0	0	0	0	0	0	0	0	0	0	0	0	0	0	0	0	0	0	0	0	1	0	0	0
OTU_2180	Bacteria	Chloroflexi	Chloroflexia	Thermomicrobiales	JG30-KF-CM45	uncultured bacterium	uncultured bacterium	0	0	0	0	0	0	0	0	0	0	0	0	0	0	0	0	0	0	0	0	0	1	0	0
OTU_2186	Bacteria	Verrucomicrobia	Verrucomicrobiae	Verrucomicrobiales	Rubritaleaceae	Luteolibacter	uncultured bacterium	0	0	0	0	0	0	0	0	0	0	0	0	0	0	0	0	0	0	0	0	0	0	1	0
OTU_2187	Bacteria	Firmicutes	Bacilli	Bacillales	Bacillaceae	Bacillus	Unclassified	0	0	0	0	0	0	0	0	0	0	0	0	0	0	0	1	0	0	0	0	0	0	0	0
OTU_2190	Bacteria	Proteobacteria	Alphaproteobacteria	Rhizobiales	Rhizobiaceae	Unclassified	Unclassified	0	0	0	0	0	0	0	0	0	0	0	0	0	0	0	0	0	0	0	0	0	0	0	1
OTU_2191	Bacteria	Marinimicrobia (SAR406 clade)	Unclassified	Unclassified	Unclassified	Unclassified	Unclassified	0	1	0	0	0	0	0	0	0	0	0	0	0	0	0	0	0	0	0	0	0	0	0	0
OTU_2193	Bacteria	Proteobacteria	Deltaproteobacteria	Oligoflexales	Oligoflexaceae	uncultured	Unclassified	0	1	0	0	0	0	0	0	0	0	0	0	0	0	0	0	0	0	0	0	0	0	0	0
OTU_2194	Bacteria	PAUC34f	uncultured bacterium	uncultured bacterium	uncultured bacterium	uncultured bacterium	uncultured bacterium	0	1	0	0	0	0	0	0	0	0	0	0	0	0	0	0	0	0	0	0	0	0	0	0
OTU_2199	Bacteria	Proteobacteria	Alphaproteobacteria	SAR11 clade	Clade I	Clade Ia	Unclassified	0	1	0	0	0	0	0	0	0	0	0	0	0	0	0	0	0	0	0	0	0	0	0	0
OTU_2205	Bacteria	Proteobacteria	Gammaproteobacteria	Cellvibrionales	Porticoccaceae	C1-B045	Unclassified	0	1	0	0	0	0	0	0	0	0	0	0	0	0	0	0	0	0	0	0	0	0	0	0
OTU_2207	Bacteria	Proteobacteria	Alphaproteobacteria	Sneathiellales	Sneathiellaceae	AT-s3-44	uncultured marine bacterium	0	0	0	0	0	0	0	0	0	0	0	0	0	1	0	0	0	0	0	0	0	0	0	0
OTU_2210	Bacteria	Proteobacteria	Gammaproteobacteria	Thiomicrospirales	Thioglobaceae	SUP05 cluster	uncultured organism	0	0	1	0	0	0	0	0	0	0	0	0	0	0	0	0	0	0	0	0	0	0	0	0
OTU_2214	Bacteria	Proteobacteria	Unclassified	Unclassified	Unclassified	Unclassified	Unclassified	0	0	0	0	0	0	0	0	0	0	0	0	0	0	0	0	0	0	1	0	0	0	0	0
OTU_2225	Bacteria	Proteobacteria	Alphaproteobacteria	Rhodospirillales	Thalassospiraceae	Thalassospira	Unclassified	0	0	0	0	0	0	0	0	0	0	0	0	0	0	0	0	0	0	0	1	0	0	0	0
OTU_2235	Bacteria	Proteobacteria	Gammaproteobacteria	Alteromonadales	Moritellaceae	Moritella	uncultured bacterium	0	0	0	0	0	0	0	0	0	0	0	0	0	0	0	0	0	0	0	0	1	0	0	0
OTU_2245	Bacteria	Proteobacteria	Alphaproteobacteria	Rickettsiales	S25-593	uncultured bacterium	uncultured bacterium	0	0	0	0	0	0	0	0	0	0	0	0	0	0	1	0	0	0	0	0	0	0	0	0
OTU_2249	Bacteria	Chloroflexi	Dehalococcoidia	SAR202 clade	hydrothermal vent metagenome	hydrothermal vent metagenome	hydrothermal vent metagenome	0	0	0	0	0	0	0	0	0	0	0	0	0	1	0	0	0	0	0	0	0	0	0	0
OTU_2253	Bacteria	Actinobacteria	Thermoleophilia	Solirubrobacterales	Unclassified	Unclassified	Unclassified	0	0	0	0	0	0	0	0	0	0	0	0	0	0	1	0	0	0	0	0	0	0	0	0
OTU_2254	Bacteria	Proteobacteria	Alphaproteobacteria	Unclassified	Unclassified	Unclassified	Unclassified	0	0	1	0	0	0	0	0	0	0	0	0	0	0	0	0	0	0	0	0	0	0	0	0
OTU_2263	Bacteria	Chloroflexi	Dehalococcoidia	SAR202 clade	uncultured gamma proteobacterium	uncultured gamma proteobacterium	uncultured gamma proteobacterium	0	0	1	0	0	0	0	0	0	0	0	0	0	0	0	0	0	0	0	0	0	0	0	0
OTU_2268	Bacteria	Firmicutes	Clostridia	Clostridiales	Ruminococcaceae	Fastidiosipila	bacterium str. Rauti	0	0	0	0	0	0	0	0	0	0	0	0	0	0	0	0	1	0	0	0	0	0	0	0
OTU_2269	Bacteria	Lentisphaerae	Lentisphaeria	Victivallales	Arctic95B-14	uncultured bacterium	uncultured bacterium	0	0	0	0	0	0	0	0	0	0	0	0	0	1	0	0	0	0	0	0	0	0	0	0
OTU_2270	Bacteria	Planctomycetes	OM190	uncultured Planctomycetaceae bacterium	uncultured Planctomycetaceae bacterium	uncultured Planctomycetaceae bacterium	uncultured Planctomycetaceae bacterium	0	0	0	0	0	0	0	0	0	0	0	0	0	1	0	0	0	0	0	0	0	0	0	0
OTU_2272	Bacteria	Nitrospinae	Nitrospinia	Nitrospinales	Nitrospinaceae	LS-NOB	uncultured organism	0	0	0	0	0	0	0	0	0	0	0	0	0	0	0	0	1	0	0	0	0	0	0	0
OTU_2277	Bacteria	Actinobacteria	Acidimicrobiia	Unclassified	Unclassified	Unclassified	Unclassified	0	0	0	0	0	0	0	0	0	0	0	0	0	1	0	0	0	0	0	0	0	0	0	0
OTU_2280	Bacteria	Chloroflexi	Dehalococcoidia	SAR202 clade	uncultured sediment bacterium	uncultured sediment bacterium	uncultured sediment bacterium	0	0	0	0	0	0	0	0	0	0	0	0	0	1	0	0	0	0	0	0	0	0	0	0
OTU_2283	Bacteria	Bacteroidetes	Bacteroidia	Flavobacteriales	Crocinitomicaceae	Crocinitomix	uncultured Flavobacteriia bacterium	0	0	0	0	0	0	0	0	0	0	0	0	0	1	0	0	0	0	0	0	0	0	0	0
OTU_2284	Bacteria	Proteobacteria	Unclassified	Unclassified	Unclassified	Unclassified	Unclassified	0	0	0	0	0	0	0	0	0	0	0	0	0	1	0	0	0	0	0	0	0	0	0	0
OTU_2286	Bacteria	Proteobacteria	Alphaproteobacteria	SAR11 clade	Clade I	Clade Ia	uncultured Pelagibacterales bacterium	0	1	0	0	0	0	0	0	0	0	0	0	0	0	0	0	0	0	0	0	0	0	0	0
OTU_2291	Bacteria	Proteobacteria	Deltaproteobacteria	SAR324 clade(Marine group B)	Unclassified	Unclassified	Unclassified	0	1	0	0	0	0	0	0	0	0	0	0	0	0	0	0	0	0	0	0	0	0	0	0
OTU_2295	Bacteria	Planctomycetes	Planctomycetacia	Pirellulales	Pirellulaceae	Blastopirellula	uncultured Pirellula clone 5H12	0	0	0	0	0	0	1	0	0	0	0	0	0	0	0	0	0	0	0	0	0	0	0	0
OTU_2303	Bacteria	Proteobacteria	Gammaproteobacteria	Unclassified	Unclassified	Unclassified	Unclassified	1	0	0	0	0	0	0	0	0	0	0	0	0	0	0	0	0	0	0	0	0	0	0	0
OTU_2305	Bacteria	Marinimicrobia (SAR406 clade)	uncultured Candidatus Marinimicrobia bacterium	uncultured Candidatus Marinimicrobia bacterium	uncultured Candidatus Marinimicrobia bacterium	uncultured Candidatus Marinimicrobia bacterium	uncultured Candidatus Marinimicrobia bacterium	1	0	0	0	0	0	0	0	0	0	0	0	0	0	0	0	0	0	0	0	0	0	0	0
OTU_2308	Bacteria	Proteobacteria	Gammaproteobacteria	Thiomicrospirales	Thioglobaceae	SUP05 cluster	uncultured organism	0	1	0	0	0	0	0	0	0	0	0	0	0	0	0	0	0	0	0	0	0	0	0	0
OTU_2311	Bacteria	Chloroflexi	Dehalococcoidia	SAR202 clade	hydrothermal vent metagenome	hydrothermal vent metagenome	hydrothermal vent metagenome	0	1	0	0	0	0	0	0	0	0	0	0	0	0	0	0	0	0	0	0	0	0	0	0
OTU_2313	Bacteria	Proteobacteria	Gammaproteobacteria	EC3	uncultured bacterium	uncultured bacterium	uncultured bacterium	0	0	0	0	0	0	0	0	0	0	0	1	0	0	0	0	0	0	0	0	0	0	0	0
OTU_2314	Bacteria	Proteobacteria	Alphaproteobacteria	SAR11 clade	Clade II	uncultured bacterium HF0770_37D02	uncultured bacterium HF0770_37D02	0	0	0	0	0	0	0	0	0	0	0	0	0	0	1	0	0	0	0	0	0	0	0	0
OTU_2315	Bacteria	Planctomycetes	Phycisphaerae	Phycisphaerales	Phycisphaeraceae	JL-ETNP-F27	uncultured bacterium	0	0	0	0	0	0	0	0	0	0	0	0	0	0	1	0	0	0	0	0	0	0	0	0
OTU_2318	Bacteria	Acidobacteria	Subgroup 6	Unclassified	Unclassified	Unclassified	Unclassified	0	0	0	0	0	0	0	0	0	0	0	0	0	0	1	0	0	0	0	0	0	0	0	0
OTU_2319	Bacteria	Marinimicrobia (SAR406 clade)	hydrothermal vent metagenome	hydrothermal vent metagenome	hydrothermal vent metagenome	hydrothermal vent metagenome	hydrothermal vent metagenome	0	0	0	0	0	0	0	0	0	0	0	0	0	0	1	0	0	0	0	0	0	0	0	0
OTU_2325	Bacteria	Bacteroidetes	Bacteroidia	Flavobacteriales	Cryomorphaceae	uncultured	Unclassified	0	0	0	0	0	0	0	0	0	0	0	0	0	0	1	0	0	0	0	0	0	0	0	0
OTU_2326	Bacteria	Marinimicrobia (SAR406 clade)	uncultured bacterium	uncultured bacterium	uncultured bacterium	uncultured bacterium	uncultured bacterium	0	0	0	0	0	0	0	0	0	0	0	0	0	0	1	0	0	0	0	0	0	0	0	0
OTU_2327	Bacteria	Proteobacteria	Deltaproteobacteria	Myxococcales	P3OB-42	uncultured bacterium	uncultured bacterium	0	0	0	0	0	0	0	0	0	0	0	0	0	0	1	0	0	0	0	0	0	0	0	0
OTU_2328	Bacteria	Proteobacteria	Gammaproteobacteria	JTB23	uncultured gamma proteobacterium	uncultured gamma proteobacterium	uncultured gamma proteobacterium	0	0	0	0	0	0	0	0	0	0	0	0	0	0	1	0	0	0	0	0	0	0	0	0
OTU_2330	Bacteria	Proteobacteria	Gammaproteobacteria	Coxiellales	Coxiellaceae	Coxiella	uncultured marine bacterium	0	0	0	0	0	0	0	0	0	0	0	0	0	0	0	0	0	1	0	0	0	0	0	0
OTU_2334	Bacteria	Verrucomicrobia	Verrucomicrobiae	Arctic97B-4 marine group	uncultured bacterium AD243-C9	uncultured bacterium AD243-C9	uncultured bacterium AD243-C9	0	0	0	0	0	0	0	0	0	0	0	0	0	0	1	0	0	0	0	0	0	0	0	0
OTU_2339	Bacteria	Patescibacteria	Saccharimonadia	Saccharimonadales	Saccharimonadaceae	uncultured bacterium	uncultured bacterium	0	0	0	0	0	0	0	0	0	1	0	0	0	0	0	0	0	0	0	0	0	0	0	0
OTU_2340	Bacteria	Actinobacteria	Acidimicrobiia	Microtrichales	Microtrichaceae	Sva0996 marine group	marine metagenome	0	0	0	0	0	0	1	0	0	0	0	0	0	0	0	0	0	0	0	0	0	0	0	0
OTU_2341	Bacteria	Actinobacteria	Actinobacteria	Propionibacteriales	Propionibacteriaceae	uncultured	uncultured Actinomycetales bacterium	0	0	0	0	0	0	0	0	0	0	0	0	0	0	0	1	0	0	0	0	0	0	0	0
OTU_2342	Bacteria	Proteobacteria	Gammaproteobacteria	Alteromonadales	Alteromonadaceae	Alteromonas	Unclassified	0	0	0	0	0	0	0	0	0	1	0	0	0	0	0	0	0	0	0	0	0	0	0	0
OTU_2347	Bacteria	Proteobacteria	Alphaproteobacteria	Rhodobacterales	Rhodobacteraceae	Unclassified	Unclassified	0	0	0	0	0	0	0	0	0	0	0	0	0	0	0	0	1	0	0	0	0	0	0	0
OTU_2353	Bacteria	Actinobacteria	Coriobacteriia	CG2-30-50-142	uncultured bacterium	uncultured bacterium	uncultured bacterium	0	0	0	0	0	0	0	0	1	0	0	0	0	0	0	0	0	0	0	0	0	0	0	0
OTU_2354	Bacteria	Cyanobacteria	Oxyphotobacteria	Synechococcales	Cyanobiaceae	Cyanobium PCC-6307	Unclassified	0	0	0	0	0	0	0	0	0	0	0	0	1	0	0	0	0	0	0	0	0	0	0	0
OTU_2357	Bacteria	Bacteroidetes	Bacteroidia	Flavobacteriales	Flavobacteriaceae	NS5 marine group	Unclassified	0	0	0	0	0	0	0	0	0	0	0	0	1	0	0	0	0	0	0	0	0	0	0	0
OTU_2367	Bacteria	Proteobacteria	Deltaproteobacteria	NB1-j	uncultured bacterium	uncultured bacterium	uncultured bacterium	0	0	0	0	0	0	0	0	1	0	0	0	0	0	0	0	0	0	0	0	0	0	0	0
OTU_2368	Bacteria	Actinobacteria	Acidimicrobiia	Actinomarinales	Actinomarinaceae	Candidatus Actinomarina	Unclassified	1	0	0	0	0	0	0	0	0	0	0	0	0	0	0	0	0	0	0	0	0	0	0	0
OTU_2371	Bacteria	Proteobacteria	Alphaproteobacteria	Sphingomonadales	Sphingomonadaceae	Unclassified	Unclassified	1	0	0	0	0	0	0	0	0	0	0	0	0	0	0	0	0	0	0	0	0	0	0	0
OTU_2381	Bacteria	Planctomycetes	OM190	Unclassified	Unclassified	Unclassified	Unclassified	0	0	0	0	0	0	0	0	0	0	0	0	0	0	0	0	0	0	0	0	1	0	0	0
OTU_2382	Bacteria	Actinobacteria	Thermoleophilia	Solirubrobacterales	67-14	Unclassified	Unclassified	0	0	0	0	0	0	0	0	0	1	0	0	0	0	0	0	0	0	0	0	0	0	0	0
OTU_2386	Bacteria	Proteobacteria	Gammaproteobacteria	Alteromonadales	Alteromonadaceae	Unclassified	Unclassified	0	0	0	0	0	0	0	0	0	1	0	0	0	0	0	0	0	0	0	0	0	0	0	0
OTU_2389	Bacteria	Proteobacteria	Gammaproteobacteria	Cellvibrionales	Spongiibacteraceae	BD1-7 clade	uncultured gamma proteobacterium	0	0	0	0	0	0	0	0	0	0	0	0	0	0	0	0	0	0	0	0	0	0	1	0
OTU_2390	Bacteria	Bacteroidetes	Bacteroidia	Chitinophagales	Saprospiraceae	uncultured	uncultured deep-sea bacterium	0	0	0	0	0	0	0	0	0	0	0	0	0	0	0	0	0	0	0	0	0	0	1	0
OTU_2394	Bacteria	Proteobacteria	Deltaproteobacteria	Myxococcales	Sandaracinaceae	Sandaracinus	uncultured bacterium	0	0	0	0	0	0	0	0	0	0	0	0	0	0	0	0	0	0	0	0	0	0	0	1
OTU_2395	Bacteria	Proteobacteria	Gammaproteobacteria	Alteromonadales	Alteromonadaceae	Alteromonas	Unclassified	0	0	0	1	0	0	0	0	0	0	0	0	0	0	0	0	0	0	0	0	0	0	0	0
OTU_2402	Bacteria	Cyanobacteria	Oxyphotobacteria	Synechococcales	Cyanobiaceae	Prochlorococcus MIT9313	Unclassified	1	0	0	0	0	0	0	0	0	0	0	0	0	0	0	0	0	0	0	0	0	0	0	0
OTU_2405	Bacteria	Proteobacteria	Gammaproteobacteria	Coxiellales	Coxiellaceae	Coxiella	uncultured Legionellales bacterium	1	0	0	0	0	0	0	0	0	0	0	0	0	0	0	0	0	0	0	0	0	0	0	0
OTU_2407	Bacteria	Proteobacteria	Alphaproteobacteria	Rhodospirillales	Magnetospiraceae	uncultured	Unclassified	0	0	0	0	0	0	0	0	0	0	0	1	0	0	0	0	0	0	0	0	0	0	0	0
OTU_2418	Bacteria	Proteobacteria	Gammaproteobacteria	SAR86 clade	Unclassified	Unclassified	Unclassified	0	0	0	0	0	0	0	0	0	0	0	0	0	0	0	0	0	0	0	0	0	0	1	0
OTU_2422	Bacteria	Proteobacteria	Deltaproteobacteria	Bdellovibrionales	Bdellovibrionaceae	OM27 clade	uncultured marine bacterium	0	0	0	0	0	0	0	0	0	0	0	0	0	0	0	0	0	0	0	0	0	0	1	0
OTU_2427	Bacteria	Acidobacteria	Subgroup 26	uncultured bacterium SAT52-B4	uncultured bacterium SAT52-B4	uncultured bacterium SAT52-B4	uncultured bacterium SAT52-B4	0	0	1	0	0	0	0	0	0	0	0	0	0	0	0	0	0	0	0	0	0	0	0	0
OTU_2431	Bacteria	Proteobacteria	Deltaproteobacteria	NB1-j	Unclassified	Unclassified	Unclassified	0	0	0	0	0	0	0	0	0	0	0	0	0	0	0	0	0	0	0	0	0	1	0	0
OTU_2433	Bacteria	Margulisbacteria	uncultured marine cyanobacterium	uncultured marine cyanobacterium	uncultured marine cyanobacterium	uncultured marine cyanobacterium	uncultured marine cyanobacterium	0	0	0	0	0	0	0	1	0	0	0	0	0	0	0	0	0	0	0	0	0	0	0	0
OTU_2439	Bacteria	Bacteroidetes	Bacteroidia	Cytophagales	Cyclobacteriaceae	Fabibacter	Unclassified	0	0	0	0	0	1	0	0	0	0	0	0	0	0	0	0	0	0	0	0	0	0	0	0
OTU_2440	Bacteria	Planctomycetes	Planctomycetacia	Planctomycetales	uncultured	uncultured bacterium	uncultured bacterium	0	0	0	0	0	1	0	0	0	0	0	0	0	0	0	0	0	0	0	0	0	0	0	0
OTU_2442	Bacteria	Proteobacteria	Gammaproteobacteria	Pseudomonadales	Pseudomonadaceae	Pseudomonas	Unclassified	0	0	0	0	1	0	0	0	0	0	0	0	0	0	0	0	0	0	0	0	0	0	0	0
OTU_2444	Bacteria	Firmicutes	Clostridia	Clostridiales	Clostridiaceae	Anaeromicrobium	bacterium enrichment culture clone PKWE30-19	0	0	0	1	0	0	0	0	0	0	0	0	0	0	0	0	0	0	0	0	0	0	0	0
OTU_2446	Bacteria	Proteobacteria	Gammaproteobacteria	Alteromonadales	Pseudoalteromonadaceae	Pseudoalteromonas	Unclassified	0	0	0	0	0	0	1	0	0	0	0	0	0	0	0	0	0	0	0	0	0	0	0	0
OTU_2449	Bacteria	Proteobacteria	Alphaproteobacteria	Unclassified	Unclassified	Unclassified	Unclassified	0	0	0	0	0	0	0	0	1	0	0	0	0	0	0	0	0	0	0	0	0	0	0	0
OTU_2451	Bacteria	Proteobacteria	Gammaproteobacteria	Alteromonadales	Pseudoalteromonadaceae	Pseudoalteromonas	Unclassified	0	0	0	0	0	0	0	1	0	0	0	0	0	0	0	0	0	0	0	0	0	0	0	0
OTU_2452	Bacteria	Proteobacteria	Gammaproteobacteria	Alteromonadales	Pseudoalteromonadaceae	Pseudoalteromonas	Unclassified	0	0	0	0	0	0	1	0	0	0	0	0	0	0	0	0	0	0	0	0	0	0	0	0
OTU_2454	Bacteria	Proteobacteria	Alphaproteobacteria	Rhodobacterales	Rhodobacteraceae	Unclassified	Unclassified	0	0	0	0	0	0	0	1	0	0	0	0	0	0	0	0	0	0	0	0	0	0	0	0
OTU_2458	Bacteria	Proteobacteria	Alphaproteobacteria	Rhodobacterales	Rhodobacteraceae	Unclassified	Unclassified	0	0	0	0	0	0	0	0	0	0	1	0	0	0	0	0	0	0	0	0	0	0	0	0
OTU_2467	Bacteria	Proteobacteria	Gammaproteobacteria	Coxiellales	Coxiellaceae	Coxiella	Unclassified	0	0	0	0	0	0	0	0	1	0	0	0	0	0	0	0	0	0	0	0	0	0	0	0
OTU_2478	Bacteria	Proteobacteria	Gammaproteobacteria	Coxiellales	Coxiellaceae	Coxiella	uncultured Legionella sp.	0	0	0	0	0	1	0	0	0	0	0	0	0	0	0	0	0	0	0	0	0	0	0	0
OTU_2482	Bacteria	Actinobacteria	Actinobacteria	Micrococcales	Promicromonosporaceae	Promicromonospora	uncultured archaeon	0	0	0	0	0	0	0	0	0	0	0	1	0	0	0	0	0	0	0	0	0	0	0	0
OTU_2483	Bacteria	Firmicutes	Clostridia	Clostridiales	Heliobacteriaceae	Hydrogenispora	uncultured bacterium	0	0	0	0	0	0	0	0	0	0	0	1	0	0	0	0	0	0	0	0	0	0	0	0
OTU_2485	Bacteria	Fibrobacteres	Chitinivibrionia	Chitinivibrionales	Chitinivibrionaceae	possible genus 03	uncultured bacterium	0	0	0	0	0	1	0	0	0	0	0	0	0	0	0	0	0	0	0	0	0	0	0	0
OTU_2486	Bacteria	Unclassified	Unclassified	Unclassified	Unclassified	Unclassified	Unclassified	0	0	0	0	0	1	0	0	0	0	0	0	0	0	0	0	0	0	0	0	0	0	0	0
OTU_2487	Bacteria	Bacteroidetes	Bacteroidia	Bacteroidales	Tannerellaceae	Parabacteroides	Unclassified	0	0	0	0	0	1	0	0	0	0	0	0	0	0	0	0	0	0	0	0	0	0	0	0
OTU_2490	Bacteria	Actinobacteria	Acidimicrobiia	Microtrichales	Microtrichaceae	Sva0996 marine group	uncultured bacterium	0	0	0	0	0	1	0	0	0	0	0	0	0	0	0	0	0	0	0	0	0	0	0	0
OTU_2496	Bacteria	Spirochaetes	Spirochaetia	Spirochaetales	Spirochaetaceae	Spirochaeta 2	Unclassified	0	0	0	0	0	0	0	0	0	0	0	1	0	0	0	0	0	0	0	0	0	0	0	0
OTU_2497	Bacteria	Proteobacteria	Alphaproteobacteria	Rhodobacterales	Rhodobacteraceae	Unclassified	Unclassified	0	0	0	0	0	0	0	0	0	0	0	1	0	0	0	0	0	0	0	0	0	0	0	0
OTU_2500	Bacteria	Proteobacteria	Gammaproteobacteria	Betaproteobacteriales	Burkholderiaceae	Castellaniella	uncultured bacterium	0	0	0	0	0	0	0	0	0	0	1	0	0	0	0	0	0	0	0	0	0	0	0	0
OTU_2501	Bacteria	Proteobacteria	Gammaproteobacteria	Pseudomonadales	Moraxellaceae	Acinetobacter	uncultured bacterium	0	0	0	0	0	0	0	0	0	0	1	0	0	0	0	0	0	0	0	0	0	0	0	0
OTU_2502	Bacteria	Planctomycetes	OM190	uncultured bacterium	uncultured bacterium	uncultured bacterium	uncultured bacterium	0	0	0	0	0	0	0	0	0	0	0	1	0	0	0	0	0	0	0	0	0	0	0	0
OTU_2511	Bacteria	Proteobacteria	Gammaproteobacteria	Tenderiales	Tenderiaceae	Candidatus Tenderia	uncultured bacterium	0	0	0	0	0	0	0	0	0	0	0	0	0	0	0	0	0	1	0	0	0	0	0	0
OTU_2517	Bacteria	Proteobacteria	Gammaproteobacteria	Alteromonadales	Pseudoalteromonadaceae	Pseudoalteromonas	Unclassified	0	0	0	0	0	0	1	0	0	0	0	0	0	0	0	0	0	0	0	0	0	0	0	0
OTU_2519	Bacteria	Proteobacteria	Gammaproteobacteria	UBA10353 marine group	uncultured marine microorganism	uncultured marine microorganism	uncultured marine microorganism	0	0	0	0	1	0	0	0	0	0	0	0	0	0	0	0	0	0	0	0	0	0	0	0
OTU_2520	Bacteria	Patescibacteria	Gracilibacteria	Candidatus Peribacteria	uncultured Microgenomates group bacterium	uncultured Microgenomates group bacterium	uncultured Microgenomates group bacterium	0	0	0	0	1	0	0	0	0	0	0	0	0	0	0	0	0	0	0	0	0	0	0	0
OTU_2521	Bacteria	Proteobacteria	Alphaproteobacteria	Rhizobiales	Rhizobiales Incertae Sedis	Bauldia	uncultured bacterium	0	0	0	0	1	0	0	0	0	0	0	0	0	0	0	0	0	0	0	0	0	0	0	0
OTU_2523	Bacteria	Acidobacteria	Subgroup 21	uncultured bacterium	uncultured bacterium	uncultured bacterium	uncultured bacterium	0	0	0	0	0	1	0	0	0	0	0	0	0	0	0	0	0	0	0	0	0	0	0	0
OTU_2526	Bacteria	Verrucomicrobia	Verrucomicrobiae	Opitutales	Puniceicoccaceae	Verruc-01	Unclassified	0	0	0	0	0	1	0	0	0	0	0	0	0	0	0	0	0	0	0	0	0	0	0	0
OTU_2530	Bacteria	Proteobacteria	Deltaproteobacteria	Oligoflexales	Oligoflexaceae	uncultured	uncultured delta proteobacterium	0	0	0	0	0	1	0	0	0	0	0	0	0	0	0	0	0	0	0	0	0	0	0	0
OTU_2531	Bacteria	Proteobacteria	Deltaproteobacteria	Unclassified	Unclassified	Unclassified	Unclassified	0	0	0	0	0	0	0	0	0	0	0	0	0	0	1	0	0	0	0	0	0	0	0	0
OTU_2536	Bacteria	Firmicutes	Bacilli	Lactobacillales	Carnobacteriaceae	Marinilactibacillus	Marinilactibacillus sp. 15R	0	0	0	0	0	0	0	0	0	0	0	0	0	0	0	1	0	0	0	0	0	0	0	0
OTU_2546	Bacteria	Proteobacteria	Alphaproteobacteria	Rickettsiales	Rickettsiaceae	uncultured	Unclassified	0	1	0	0	0	0	0	0	0	0	0	0	0	0	0	0	0	0	0	0	0	0	0	0
OTU_2551	Bacteria	Bacteroidetes	Bacteroidia	Flavobacteriales	Flavobacteriaceae	Muricauda	Bacteroidetes bacterium GMDsbC3	0	0	0	0	0	0	0	0	0	0	0	0	0	0	0	0	1	0	0	0	0	0	0	0
OTU_2555	Bacteria	Planctomycetes	Planctomycetacia	Planctomycetales	Rubinisphaeraceae	uncultured	uncultured Planctomycetaceae bacterium	0	0	0	0	0	0	0	0	0	0	0	0	0	0	0	0	0	0	1	0	0	0	0	0
OTU_2561	Bacteria	Unclassified	Unclassified	Unclassified	Unclassified	Unclassified	Unclassified	0	0	0	0	0	0	0	0	0	0	0	0	0	0	0	0	1	0	0	0	0	0	0	0
OTU_2562	Bacteria	Omnitrophicaeota	Unclassified	Unclassified	Unclassified	Unclassified	Unclassified	0	0	0	0	0	0	0	0	0	0	0	0	0	0	0	0	0	1	0	0	0	0	0	0
OTU_2564	Bacteria	Bacteroidetes	Bacteroidia	Flavobacteriales	Flavobacteriaceae	Muricauda	Bacteroidetes bacterium GMD38C4	0	0	0	0	0	0	0	0	0	0	0	0	0	0	0	0	0	1	0	0	0	0	0	0
OTU_2566	Bacteria	Proteobacteria	Gammaproteobacteria	Coxiellales	Coxiellaceae	Coxiella	metagenome	1	0	0	0	0	0	0	0	0	0	0	0	0	0	0	0	0	0	0	0	0	0	0	0
OTU_2570	Bacteria	Patescibacteria	ABY1	Candidatus Kerfeldbacteria	metagenome	metagenome	metagenome	0	0	0	0	0	0	0	0	0	0	0	0	0	0	0	0	0	1	0	0	0	0	0	0
OTU_2572	Bacteria	Planctomycetes	Phycisphaerae	Phycisphaerales	Phycisphaeraceae	uncultured	Unclassified	0	0	0	0	0	0	0	0	0	0	0	0	0	0	1	0	0	0	0	0	0	0	0	0
OTU_2573	Bacteria	Chloroflexi	Dehalococcoidia	SAR202 clade	uncultured Chloroflexi bacterium	uncultured Chloroflexi bacterium	uncultured Chloroflexi bacterium	0	0	0	0	1	0	0	0	0	0	0	0	0	0	0	0	0	0	0	0	0	0	0	0
OTU_2587	Bacteria	Bacteroidetes	Bacteroidia	Flavobacteriales	Cryomorphaceae	Cryomorpha	uncultured deep-sea bacterium	0	1	0	0	0	0	0	0	0	0	0	0	0	0	0	0	0	0	0	0	0	0	0	0
OTU_2591	Bacteria	Chloroflexi	Dehalococcoidia	SAR202 clade	Unclassified	Unclassified	Unclassified	0	1	0	0	0	0	0	0	0	0	0	0	0	0	0	0	0	0	0	0	0	0	0	0
OTU_2595	Bacteria	Cyanobacteria	Oxyphotobacteria	Synechococcales	Cyanobiaceae	Cyanobium PCC-6307	Unclassified	0	0	0	0	0	0	0	0	0	0	0	0	1	0	0	0	0	0	0	0	0	0	0	0
OTU_2596	Bacteria	Proteobacteria	Gammaproteobacteria	Thiomicrospirales	Thioglobaceae	SUP05 cluster	uncultured organism	0	1	0	0	0	0	0	0	0	0	0	0	0	0	0	0	0	0	0	0	0	0	0	0
OTU_2597	Bacteria	Proteobacteria	Alphaproteobacteria	Rhodospirillales	Magnetospiraceae	uncultured	uncultured bacterium	0	1	0	0	0	0	0	0	0	0	0	0	0	0	0	0	0	0	0	0	0	0	0	0
OTU_2600	Bacteria	Proteobacteria	Alphaproteobacteria	Rhodobacterales	Rhodobacteraceae	Unclassified	Unclassified	0	0	0	0	0	0	0	0	0	0	0	1	0	0	0	0	0	0	0	0	0	0	0	0
OTU_2603	Bacteria	Chloroflexi	Dehalococcoidia	SAR202 clade	uncultured bacterium	uncultured bacterium	uncultured bacterium	0	0	1	0	0	0	0	0	0	0	0	0	0	0	0	0	0	0	0	0	0	0	0	0
OTU_2610	Bacteria	Proteobacteria	Gammaproteobacteria	Oceanospirillales	SS1-B-06-26	Alcanivoracaceae bacterium GI5	Alcanivoracaceae bacterium GI5	0	0	0	0	0	0	0	0	1	0	0	0	0	0	0	0	0	0	0	0	0	0	0	0
OTU_2612	Bacteria	Actinobacteria	Actinobacteria	Corynebacteriales	Corynebacteriaceae	Corynebacterium	uncultured bacterium	0	0	0	0	0	0	0	0	1	0	0	0	0	0	0	0	0	0	0	0	0	0	0	0
OTU_2613	Bacteria	Cyanobacteria	Oxyphotobacteria	Nostocales	Phormidiaceae	Trichodesmium IMS101	Trichodesmium erythraeum IMS101	0	0	0	0	0	0	0	0	1	0	0	0	0	0	0	0	0	0	0	0	0	0	0	0
OTU_2618	Bacteria	Proteobacteria	Alphaproteobacteria	Rhizobiales	Rhizobiaceae	Unclassified	Unclassified	0	0	0	0	0	1	0	0	0	0	0	0	0	0	0	0	0	0	0	0	0	0	0	0
OTU_2619	Bacteria	Chloroflexi	Dehalococcoidia	SAR202 clade	uncultured SAR202 cluster bacterium	uncultured SAR202 cluster bacterium	uncultured SAR202 cluster bacterium	0	0	0	0	0	1	0	0	0	0	0	0	0	0	0	0	0	0	0	0	0	0	0	0
OTU_2620	Bacteria	Chloroflexi	JG30-KF-CM66	Unclassified	Unclassified	Unclassified	Unclassified	0	0	0	0	0	1	0	0	0	0	0	0	0	0	0	0	0	0	0	0	0	0	0	0
OTU_2624	Bacteria	Verrucomicrobia	Verrucomicrobiae	Opitutales	Puniceicoccaceae	Unclassified	Unclassified	0	0	0	0	0	1	0	0	0	0	0	0	0	0	0	0	0	0	0	0	0	0	0	0
OTU_2625	Bacteria	Actinobacteria	Actinobacteria	Streptomycetales	Streptomycetaceae	Streptomyces	Streptomyces oceani	0	0	0	0	0	0	0	1	0	0	0	0	0	0	0	0	0	0	0	0	0	0	0	0
OTU_2629	Bacteria	Planctomycetes	Planctomycetacia	Planctomycetales	Unclassified	Unclassified	Unclassified	0	0	1	0	0	0	0	0	0	0	0	0	0	0	0	0	0	0	0	0	0	0	0	0
OTU_2632	Bacteria	Proteobacteria	Alphaproteobacteria	Rickettsiales	SM2D12	Unclassified	Unclassified	0	1	0	0	0	0	0	0	0	0	0	0	0	0	0	0	0	0	0	0	0	0	0	0
OTU_2633	Bacteria	Proteobacteria	Deltaproteobacteria	SAR324 clade(Marine group B)	uncultured SAR324 cluster bacterium	uncultured SAR324 cluster bacterium	uncultured SAR324 cluster bacterium	0	1	0	0	0	0	0	0	0	0	0	0	0	0	0	0	0	0	0	0	0	0	0	0
OTU_2634	Bacteria	Marinimicrobia (SAR406 clade)	uncultured bacterium	uncultured bacterium	uncultured bacterium	uncultured bacterium	uncultured bacterium	0	0	1	0	0	0	0	0	0	0	0	0	0	0	0	0	0	0	0	0	0	0	0	0
OTU_2635	Bacteria	Marinimicrobia (SAR406 clade)	Unclassified	Unclassified	Unclassified	Unclassified	Unclassified	0	0	1	0	0	0	0	0	0	0	0	0	0	0	0	0	0	0	0	0	0	0	0	0
OTU_2636	Bacteria	Actinobacteria	Acidimicrobiia	Microtrichales	Microtrichaceae	Sva0996 marine group	Unclassified	0	1	0	0	0	0	0	0	0	0	0	0	0	0	0	0	0	0	0	0	0	0	0	0
OTU_2642	Bacteria	Chloroflexi	Dehalococcoidia	SAR202 clade	hydrothermal vent metagenome	hydrothermal vent metagenome	hydrothermal vent metagenome	0	0	1	0	0	0	0	0	0	0	0	0	0	0	0	0	0	0	0	0	0	0	0	0
OTU_2645	Bacteria	Proteobacteria	Deltaproteobacteria	SAR324 clade(Marine group B)	marine metagenome	marine metagenome	marine metagenome	0	0	1	0	0	0	0	0	0	0	0	0	0	0	0	0	0	0	0	0	0	0	0	0
OTU_2648	Bacteria	Proteobacteria	Gammaproteobacteria	Steroidobacterales	Woeseiaceae	Woeseia	marine metagenome	1	0	0	0	0	0	0	0	0	0	0	0	0	0	0	0	0	0	0	0	0	0	0	0
OTU_2649	Bacteria	Proteobacteria	Gammaproteobacteria	Coxiellales	Coxiellaceae	Coxiella	Unclassified	0	1	0	0	0	0	0	0	0	0	0	0	0	0	0	0	0	0	0	0	0	0	0	0
OTU_2658	Bacteria	Bacteroidetes	Bacteroidia	Chitinophagales	Saprospiraceae	Saprospira	Saprospira grandis DSM 2844	0	0	0	0	0	0	0	0	0	0	0	0	0	0	0	0	0	0	0	0	1	0	0	0
OTU_2661	Bacteria	Firmicutes	Clostridia	Clostridiales	Family XI	Murdochiella	unidentified marine bacterioplankton	0	0	0	0	0	0	0	0	0	0	0	0	0	0	0	0	1	0	0	0	0	0	0	0
OTU_2662	Bacteria	Firmicutes	Clostridia	Clostridiales	Family XI	Anaerococcus	uncultured bacterium	0	0	0	0	0	0	0	0	0	0	0	0	0	0	0	0	1	0	0	0	0	0	0	0
OTU_2663	Bacteria	Proteobacteria	Alphaproteobacteria	Rhizobiales	Rhizobiaceae	Unclassified	Unclassified	0	0	0	0	0	0	0	0	0	0	0	0	0	0	0	0	0	0	0	0	0	0	0	1
OTU_2665	Bacteria	Planctomycetes	OM190	Unclassified	Unclassified	Unclassified	Unclassified	0	0	0	0	0	0	0	0	0	0	0	0	0	0	0	0	0	0	0	0	0	0	1	0
OTU_2672	Bacteria	Actinobacteria	Acidimicrobiia	Microtrichales	Ilumatobacteraceae	Ilumatobacter	uncultured bacterium	0	0	0	0	0	0	0	0	0	0	0	0	0	0	0	0	0	0	0	0	0	0	1	0
OTU_2679	Bacteria	Bacteroidetes	Bacteroidia	Flavobacteriales	Flavobacteriaceae	Croceibacter	Croceibacter atlanticus HTCC2559	0	0	0	0	0	0	0	0	0	0	0	0	0	0	0	0	0	0	0	0	0	0	0	1
OTU_2682	Bacteria	Proteobacteria	Alphaproteobacteria	Sphingomonadales	Sphingomonadaceae	Sphingobium	uncultured Sphingobium sp.	0	0	0	0	0	0	0	0	0	0	0	0	0	0	0	0	0	0	0	0	0	0	1	0
OTU_2687	Bacteria	Margulisbacteria	uncultured marine cyanobacterium	uncultured marine cyanobacterium	uncultured marine cyanobacterium	uncultured marine cyanobacterium	uncultured marine cyanobacterium	0	0	0	0	0	0	0	0	1	0	0	0	0	0	0	0	0	0	0	0	0	0	0	0
OTU_2697	Bacteria	Actinobacteria	Actinobacteria	Micromonosporales	Micromonosporaceae	Actinoplanes	uncultured bacterium	0	0	0	0	0	0	0	1	0	0	0	0	0	0	0	0	0	0	0	0	0	0	0	0
OTU_2698	Bacteria	Proteobacteria	Gammaproteobacteria	Alteromonadales	Pseudoalteromonadaceae	Pseudoalteromonas	Unclassified	0	0	0	0	0	0	0	1	0	0	0	0	0	0	0	0	0	0	0	0	0	0	0	0
OTU_2702	Bacteria	Proteobacteria	Gammaproteobacteria	Unclassified	Unclassified	Unclassified	Unclassified	0	0	0	0	0	0	0	0	1	0	0	0	0	0	0	0	0	0	0	0	0	0	0	0
OTU_2707	Bacteria	Lentisphaerae	Oligosphaeria	SS1-B-02-17	uncultured bacterium	uncultured bacterium	uncultured bacterium	0	0	0	0	0	0	0	0	0	0	0	0	0	0	0	0	0	0	0	0	1	0	0	0
OTU_2708	Bacteria	Gemmatimonadetes	Gemmatimonadetes	Gemmatimonadales	Gemmatimonadaceae	Gemmatimonas	Unclassified	0	0	0	0	0	0	0	0	0	0	0	0	0	0	0	0	0	0	0	0	1	0	0	0
OTU_2711	Bacteria	Firmicutes	Bacilli	Lactobacillales	Aerococcaceae	Aerococcus	Aerococcus urinaeequi	0	0	0	0	0	0	0	0	0	0	0	0	0	0	0	0	0	0	0	0	1	0	0	0
OTU_2716	Bacteria	Chloroflexi	Dehalococcoidia	SAR202 clade	hydrothermal vent metagenome	hydrothermal vent metagenome	hydrothermal vent metagenome	0	0	0	0	0	0	0	0	0	0	0	0	0	0	0	0	0	1	0	0	0	0	0	0
OTU_2723	Bacteria	Proteobacteria	Alphaproteobacteria	SAR11 clade	Clade II	marine metagenome	marine metagenome	0	0	0	0	0	0	0	0	0	0	0	0	0	0	0	0	0	1	0	0	0	0	0	0
OTU_2734	Bacteria	Bacteroidetes	Bacteroidia	Flavobacteriales	Weeksellaceae	Bergeyella	Chryseobacterium sp.	0	0	0	0	0	0	0	0	0	0	0	0	0	0	0	0	0	0	0	0	0	1	0	0
OTU_2735	Bacteria	Proteobacteria	Gammaproteobacteria	Vibrionales	Vibrionaceae	Vibrio	Vibrio chagasii	0	0	0	0	0	0	0	0	0	0	0	0	0	0	0	0	0	0	0	1	0	0	0	0
OTU_2739	Bacteria	Verrucomicrobia	Verrucomicrobiae	Opitutales	Puniceicoccaceae	Coraliomargarita	uncultured organism	0	0	0	0	0	0	0	0	0	0	0	0	0	0	0	0	0	0	0	1	0	0	0	0
OTU_2743	Bacteria	Proteobacteria	Deltaproteobacteria	SAR324 clade(Marine group B)	marine metagenome	marine metagenome	marine metagenome	0	0	0	0	0	0	0	0	0	0	0	0	0	0	0	0	0	0	0	1	0	0	0	0
OTU_2745	Bacteria	Proteobacteria	Deltaproteobacteria	NB1-j	uncultured organism	uncultured organism	uncultured organism	0	0	0	0	0	0	0	0	0	0	0	0	0	0	0	0	0	0	0	1	0	0	0	0
OTU_2746	Bacteria	Proteobacteria	Gammaproteobacteria	Cellvibrionales	Cellvibrionaceae	Umboniibacter	Umboniibacter marinipuniceus	0	0	0	0	0	0	0	0	0	0	0	0	0	0	0	0	0	0	1	0	0	0	0	0
OTU_2748	Bacteria	Proteobacteria	Alphaproteobacteria	SAR11 clade	Clade I	Unclassified	Unclassified	0	0	0	0	0	0	0	0	0	0	0	0	0	0	1	0	0	0	0	0	0	0	0	0
OTU_2749	Bacteria	Proteobacteria	Gammaproteobacteria	Unclassified	Unclassified	Unclassified	Unclassified	0	0	0	0	0	0	0	0	0	0	0	0	0	0	1	0	0	0	0	0	0	0	0	0
OTU_2752	Bacteria	Proteobacteria	Alphaproteobacteria	Rhodospirillales	Magnetospiraceae	uncultured	uncultured alpha proteobacterium	0	0	0	0	0	0	0	0	0	0	0	0	0	0	0	1	0	0	0	0	0	0	0	0
OTU_2755	Bacteria	Chloroflexi	Dehalococcoidia	SAR202 clade	uncultured bacterium	uncultured bacterium	uncultured bacterium	0	0	0	0	0	0	0	0	0	0	0	0	0	0	1	0	0	0	0	0	0	0	0	0
OTU_2765	Bacteria	Proteobacteria	Gammaproteobacteria	OM182 clade	uncultured gamma proteobacterium	uncultured gamma proteobacterium	uncultured gamma proteobacterium	0	0	0	0	0	0	0	0	0	0	0	0	0	0	0	0	0	0	1	0	0	0	0	0
OTU_2771	Bacteria	Proteobacteria	Deltaproteobacteria	Bdellovibrionales	Bdellovibrionaceae	OM27 clade	Unclassified	0	0	0	0	0	0	0	0	0	0	0	0	0	0	0	0	0	0	0	1	0	0	0	0
OTU_2777	Bacteria	Proteobacteria	Deltaproteobacteria	Oligoflexales	Oligoflexaceae	uncultured	marine metagenome	0	0	1	0	0	0	0	0	0	0	0	0	0	0	0	0	0	0	0	0	0	0	0	0
OTU_2779	Bacteria	Acidobacteria	Subgroup 6	uncultured bacterium KM3-205-D9	uncultured bacterium KM3-205-D9	uncultured bacterium KM3-205-D9	uncultured bacterium KM3-205-D9	0	1	0	0	0	0	0	0	0	0	0	0	0	0	0	0	0	0	0	0	0	0	0	0
OTU_2795	Bacteria	Proteobacteria	Deltaproteobacteria	NB1-j	Unclassified	Unclassified	Unclassified	0	0	0	0	0	0	0	0	0	0	0	0	0	0	0	0	0	0	0	0	1	0	0	0
OTU_2798	Bacteria	Firmicutes	Bacilli	Bacillales	Staphylococcaceae	Staphylococcus	Unclassified	0	0	0	0	0	0	0	0	0	0	0	0	0	0	0	0	0	0	0	0	0	1	0	0
OTU_2800	Bacteria	Chloroflexi	Chloroflexia	Thermomicrobiales	JG30-KF-CM45	Unclassified	Unclassified	0	0	0	0	0	0	0	0	0	0	0	0	0	0	0	0	0	0	0	0	0	1	0	0
OTU_2803	Bacteria	Proteobacteria	Alphaproteobacteria	Rhizobiales	Beijerinckiaceae	Methylobacterium	Unclassified	0	0	0	0	0	0	0	0	0	0	0	0	0	0	0	0	0	0	0	0	0	1	0	0
OTU_2807	Bacteria	Proteobacteria	Alphaproteobacteria	Rickettsiales	AB1	uncultured alpha proteobacterium	uncultured alpha proteobacterium	0	1	0	0	0	0	0	0	0	0	0	0	0	0	0	0	0	0	0	0	0	0	0	0
OTU_2820	Bacteria	Planctomycetes	Planctomycetacia	Pirellulales	Pirellulaceae	Unclassified	Unclassified	0	0	0	0	0	0	0	0	0	0	0	0	0	0	1	0	0	0	0	0	0	0	0	0
OTU_2823	Bacteria	Proteobacteria	Gammaproteobacteria	SAR86 clade	uncultured bacterium	uncultured bacterium	uncultured bacterium	0	0	0	0	0	0	0	0	0	0	0	0	0	1	0	0	0	0	0	0	0	0	0	0
OTU_2824	Bacteria	Cyanobacteria	Oxyphotobacteria	Synechococcales	Cyanobiaceae	Synechococcus CC9902	Unclassified	0	0	0	0	0	0	0	0	0	0	0	0	1	0	0	0	0	0	0	0	0	0	0	0
OTU_2826	Bacteria	Firmicutes	Bacilli	Lactobacillales	Carnobacteriaceae	Dolosigranulum	uncultured bacterium	0	0	0	0	0	0	0	0	0	0	0	1	0	0	0	0	0	0	0	0	0	0	0	0
OTU_2834	Bacteria	Proteobacteria	Gammaproteobacteria	Cellvibrionales	Unclassified	Unclassified	Unclassified	0	0	1	0	0	0	0	0	0	0	0	0	0	0	0	0	0	0	0	0	0	0	0	0
OTU_2838	Bacteria	Actinobacteria	Acidimicrobiia	Actinomarinales	Actinomarinaceae	Candidatus Actinomarina	uncultured actinobacterium	1	0	0	0	0	0	0	0	0	0	0	0	0	0	0	0	0	0	0	0	0	0	0	0
OTU_2843	Bacteria	Proteobacteria	Alphaproteobacteria	Rhodospirillales	Magnetospiraceae	uncultured	Unclassified	0	1	0	0	0	0	0	0	0	0	0	0	0	0	0	0	0	0	0	0	0	0	0	0
OTU_2848	Bacteria	Proteobacteria	Deltaproteobacteria	SAR324 clade(Marine group B)	Unclassified	Unclassified	Unclassified	0	1	0	0	0	0	0	0	0	0	0	0	0	0	0	0	0	0	0	0	0	0	0	0
OTU_2849	Bacteria	Proteobacteria	Alphaproteobacteria	SAR11 clade	Clade II	Unclassified	Unclassified	0	0	1	0	0	0	0	0	0	0	0	0	0	0	0	0	0	0	0	0	0	0	0	0
OTU_2854	Bacteria	Actinobacteria	Acidimicrobiia	Microtrichales	Microtrichaceae	Sva0996 marine group	uncultured bacterium	0	0	0	0	0	0	0	0	0	0	0	1	0	0	0	0	0	0	0	0	0	0	0	0
OTU_2856	Bacteria	Proteobacteria	Alphaproteobacteria	Rickettsiales	Rickettsiaceae	uncultured	uncultured bacterium	0	0	0	0	0	0	0	0	1	0	0	0	0	0	0	0	0	0	0	0	0	0	0	0
OTU_2857	Bacteria	Acidobacteria	Subgroup 6	uncultured bacterium	uncultured bacterium	uncultured bacterium	uncultured bacterium	0	0	0	0	0	0	0	0	0	0	0	0	0	0	1	0	0	0	0	0	0	0	0	0
OTU_2862	Bacteria	Proteobacteria	Gammaproteobacteria	Alteromonadales	Pseudoalteromonadaceae	Pseudoalteromonas	Unclassified	0	0	0	0	0	0	1	0	0	0	0	0	0	0	0	0	0	0	0	0	0	0	0	0
OTU_2863	Bacteria	Actinobacteria	Acidimicrobiia	Actinomarinales	Actinomarinaceae	Candidatus Actinomarina	Candidatus Actinomarina minuta	0	0	0	0	0	0	1	0	0	0	0	0	0	0	0	0	0	0	0	0	0	0	0	0
OTU_2865	Bacteria	Spirochaetes	Spirochaetia	Spirochaetales	Spirochaetaceae	Spirochaeta 2	uncultured bacterium	0	0	0	0	0	1	0	0	0	0	0	0	0	0	0	0	0	0	0	0	0	0	0	0
OTU_2869	Bacteria	Proteobacteria	Deltaproteobacteria	Oligoflexales	053A03-B-DI-P58	uncultured bacterium	uncultured bacterium	0	0	0	0	0	0	0	0	0	0	0	0	0	1	0	0	0	0	0	0	0	0	0	0
OTU_2870	Bacteria	Marinimicrobia (SAR406 clade)	Unclassified	Unclassified	Unclassified	Unclassified	Unclassified	0	0	0	0	0	0	0	0	0	0	0	0	0	1	0	0	0	0	0	0	0	0	0	0
OTU_2875	Bacteria	Actinobacteria	Acidimicrobiia	Microtrichales	Microtrichaceae	Sva0996 marine group	marine metagenome	0	0	0	0	0	0	0	0	0	0	0	0	0	1	0	0	0	0	0	0	0	0	0	0
OTU_2878	Bacteria	Proteobacteria	Alphaproteobacteria	Rhizobiales	Rhizobiaceae	Unclassified	Unclassified	0	0	0	0	0	0	0	0	0	0	0	0	0	0	0	0	0	0	0	0	0	0	0	1
OTU_2879	Bacteria	Proteobacteria	Alphaproteobacteria	Rhizobiales	Rhizobiaceae	Unclassified	Unclassified	0	0	0	0	0	0	0	0	0	0	0	0	0	0	0	0	0	0	0	0	0	0	0	1
OTU_2881	Bacteria	Proteobacteria	Alphaproteobacteria	Unclassified	Unclassified	Unclassified	Unclassified	0	0	0	0	0	0	0	0	0	0	0	0	0	0	0	0	0	0	0	0	0	0	1	0
OTU_2887	Bacteria	Proteobacteria	Alphaproteobacteria	Sphingomonadales	Sphingomonadaceae	Unclassified	Unclassified	0	0	0	0	0	0	0	0	0	0	0	0	0	0	0	0	0	0	0	0	0	0	0	1
OTU_2890	Bacteria	Actinobacteria	Actinobacteria	Actinomycetales	Actinomycetaceae	Actinomyces	Actinomyces graevenitzii F0530	0	0	0	0	0	0	0	0	0	0	0	0	0	0	0	0	0	0	0	0	1	0	0	0
OTU_2903	Bacteria	Cyanobacteria	Oxyphotobacteria	Synechococcales	Cyanobiaceae	Unclassified	Unclassified	0	0	0	0	0	0	0	0	0	0	0	0	1	0	0	0	0	0	0	0	0	0	0	0
OTU_2904	Bacteria	Actinobacteria	Acidimicrobiia	Actinomarinales	Actinomarinaceae	Candidatus Actinomarina	uncultured actinobacterium	0	0	0	0	0	0	0	0	0	0	0	0	1	0	0	0	0	0	0	0	0	0	0	0
OTU_2910	Bacteria	Proteobacteria	Alphaproteobacteria	Rhizobiales	Rhizobiaceae	Unclassified	Unclassified	0	0	0	0	1	0	0	0	0	0	0	0	0	0	0	0	0	0	0	0	0	0	0	0
OTU_2914	Bacteria	Margulisbacteria	Unclassified	Unclassified	Unclassified	Unclassified	Unclassified	0	0	0	0	0	1	0	0	0	0	0	0	0	0	0	0	0	0	0	0	0	0	0	0
OTU_2915	Bacteria	Firmicutes	Clostridia	Clostridiales	Lachnospiraceae	Lachnospira	uncultured bacterium	0	0	0	0	0	0	0	0	0	0	0	0	0	0	0	0	0	0	0	0	1	0	0	0
OTU_2916	Bacteria	Nitrospinae	Nitrospinia	Nitrospinales	Nitrospinaceae	Nitrospina	Unclassified	0	0	0	0	0	1	0	0	0	0	0	0	0	0	0	0	0	0	0	0	0	0	0	0
OTU_2919	Bacteria	Proteobacteria	Alphaproteobacteria	Sphingomonadales	Sphingomonadaceae	Sphingomonas	Unclassified	0	0	0	0	0	0	0	0	0	0	0	0	0	0	0	0	0	0	0	0	1	0	0	0
OTU_2920	Bacteria	Proteobacteria	Gammaproteobacteria	Salinisphaerales	Solimonadaceae	Fontimonas	uncultured bacterium	0	0	0	0	0	0	0	1	0	0	0	0	0	0	0	0	0	0	0	0	0	0	0	0
OTU_2922	Bacteria	Proteobacteria	Gammaproteobacteria	Oceanospirillales	Saccharospirillaceae	Oleibacter	Unclassified	0	0	0	0	0	0	0	0	0	1	0	0	0	0	0	0	0	0	0	0	0	0	0	0
OTU_2925	Bacteria	Patescibacteria	Parcubacteria	Candidatus Kaiserbacteria	bacterium SH4-10	bacterium SH4-10	bacterium SH4-10	0	0	0	0	0	1	0	0	0	0	0	0	0	0	0	0	0	0	0	0	0	0	0	0
OTU_2927	Bacteria	Proteobacteria	Gammaproteobacteria	CHAB-XI-27	uncultured proteobacterium	uncultured proteobacterium	uncultured proteobacterium	0	0	0	0	1	0	0	0	0	0	0	0	0	0	0	0	0	0	0	0	0	0	0	0
OTU_2928	Bacteria	Proteobacteria	Gammaproteobacteria	Alteromonadales	Pseudoalteromonadaceae	Pseudoalteromonas	Unclassified	0	0	0	0	0	0	1	0	0	0	0	0	0	0	0	0	0	0	0	0	0	0	0	0
OTU_2930	Bacteria	Proteobacteria	Gammaproteobacteria	Cellvibrionales	BD2-7	uncultured gamma proteobacterium	uncultured gamma proteobacterium	0	0	0	0	0	0	0	0	1	0	0	0	0	0	0	0	0	0	0	0	0	0	0	0
OTU_2935	Bacteria	Proteobacteria	Gammaproteobacteria	Alteromonadales	Idiomarinaceae	Idiomarina	Idiomarina woesei	0	0	0	0	0	0	0	0	0	0	0	0	0	0	0	0	0	0	0	1	0	0	0	0
OTU_2936	Bacteria	Proteobacteria	Deltaproteobacteria	SAR324 clade(Marine group B)	uncultured SAR324 cluster bacterium	uncultured SAR324 cluster bacterium	uncultured SAR324 cluster bacterium	0	0	0	0	0	0	0	0	0	0	0	0	0	0	0	0	0	0	0	1	0	0	0	0
OTU_2939	Bacteria	Proteobacteria	Alphaproteobacteria	Rickettsiales	Midichloriaceae	MD3-55	Unclassified	0	0	0	0	0	0	0	0	0	0	0	0	0	0	0	0	0	0	1	0	0	0	0	0
OTU_2944	Bacteria	Proteobacteria	Deltaproteobacteria	Myxococcales	Blfdi19	uncultured marine bacterium	uncultured marine bacterium	0	0	0	0	0	0	0	0	0	0	0	0	0	0	0	0	0	0	0	1	0	0	0	0
OTU_2950	Bacteria	Proteobacteria	Alphaproteobacteria	Rhizobiales	Beijerinckiaceae	Methylobacterium	Unclassified	0	0	0	0	0	0	0	0	0	0	0	0	0	0	0	0	0	0	0	0	1	0	0	0
OTU_2953	Bacteria	Chloroflexi	Unclassified	Unclassified	Unclassified	Unclassified	Unclassified	0	0	0	0	0	0	0	0	0	0	0	0	0	0	0	0	0	0	0	0	0	0	1	0
OTU_2957	Bacteria	Proteobacteria	Alphaproteobacteria	Micavibrionales	Micavibrionaceae	uncultured	uncultured bacterium	0	0	0	0	0	1	0	0	0	0	0	0	0	0	0	0	0	0	0	0	0	0	0	0
OTU_2963	Bacteria	Proteobacteria	Gammaproteobacteria	Francisellales	Francisellaceae	uncultured	Unclassified	0	0	0	0	0	0	0	0	0	0	0	0	0	0	0	0	0	0	1	0	0	0	0	0
OTU_2965	Bacteria	Verrucomicrobia	Verrucomicrobiae	Opitutales	Puniceicoccaceae	Epixenosomes of Euplotidium arenarium	Epixenosomes of Euplotidium arenarium	0	0	0	0	0	0	0	0	0	0	0	0	0	0	0	0	0	0	1	0	0	0	0	0
OTU_2970	Bacteria	Proteobacteria	Deltaproteobacteria	Oligoflexales	0319-6G20	uncultured marine bacterium	uncultured marine bacterium	0	0	0	0	0	1	0	0	0	0	0	0	0	0	0	0	0	0	0	0	0	0	0	0
OTU_2971	Bacteria	Proteobacteria	Gammaproteobacteria	Pseudomonadales	Moraxellaceae	Psychrobacter	Unclassified	0	0	0	0	1	0	0	0	0	0	0	0	0	0	0	0	0	0	0	0	0	0	0	0
OTU_2975	Bacteria	Actinobacteria	Actinobacteria	Propionibacteriales	Propionibacteriaceae	Tessaracoccus	Tessaracoccus oleiagri	0	0	0	0	1	0	0	0	0	0	0	0	0	0	0	0	0	0	0	0	0	0	0	0
OTU_2976	Bacteria	Proteobacteria	Alphaproteobacteria	SAR11 clade	Clade II	Unclassified	Unclassified	0	0	0	0	0	1	0	0	0	0	0	0	0	0	0	0	0	0	0	0	0	0	0	0
OTU_2980	Bacteria	Verrucomicrobia	Verrucomicrobiae	Opitutales	Puniceicoccaceae	Pelagicoccus	uncultured bacterium	0	0	0	0	0	1	0	0	0	0	0	0	0	0	0	0	0	0	0	0	0	0	0	0
OTU_2981	Bacteria	Chloroflexi	Dehalococcoidia	SAR202 clade	uncultured bacterium	uncultured bacterium	uncultured bacterium	0	0	0	0	0	1	0	0	0	0	0	0	0	0	0	0	0	0	0	0	0	0	0	0
OTU_2983	Bacteria	Proteobacteria	Gammaproteobacteria	Alteromonadales	Unclassified	Unclassified	Unclassified	0	0	0	0	0	0	0	1	0	0	0	0	0	0	0	0	0	0	0	0	0	0	0	0
OTU_2985	Bacteria	Proteobacteria	Gammaproteobacteria	Alteromonadales	Pseudoalteromonadaceae	Pseudoalteromonas	Unclassified	0	0	0	0	0	0	0	1	0	0	0	0	0	0	0	0	0	0	0	0	0	0	0	0
OTU_2986	Bacteria	Proteobacteria	Gammaproteobacteria	Gammaproteobacteria Incertae Sedis	Unknown Family	Marinicella	uncultured bacterium	0	0	0	0	0	0	0	1	0	0	0	0	0	0	0	0	0	0	0	0	0	0	0	0
OTU_2987	Bacteria	WPS-2	hydrothermal vent metagenome	hydrothermal vent metagenome	hydrothermal vent metagenome	hydrothermal vent metagenome	hydrothermal vent metagenome	0	0	0	0	1	0	0	0	0	0	0	0	0	0	0	0	0	0	0	0	0	0	0	0
OTU_2990	Bacteria	Proteobacteria	Alphaproteobacteria	Sphingomonadales	Sphingomonadaceae	Altererythrobacter	Unclassified	0	0	0	0	1	0	0	0	0	0	0	0	0	0	0	0	0	0	0	0	0	0	0	0
OTU_2999	Bacteria	Proteobacteria	Alphaproteobacteria	Rhodobacterales	Rhodobacteraceae	Unclassified	Unclassified	0	0	0	0	0	0	0	0	1	0	0	0	0	0	0	0	0	0	0	0	0	0	0	0
OTU_3001	Bacteria	Cyanobacteria	Melainabacteria	Vampirovibrionales	uncultured bacterium	uncultured bacterium	uncultured bacterium	0	0	0	0	0	0	0	0	1	0	0	0	0	0	0	0	0	0	0	0	0	0	0	0
OTU_3004	Bacteria	Proteobacteria	Gammaproteobacteria	Oceanospirillales	Kangiellaceae	uncultured	uncultured bacterium	0	0	0	0	0	0	0	0	1	0	0	0	0	0	0	0	0	0	0	0	0	0	0	0
OTU_3006	Bacteria	Proteobacteria	Alphaproteobacteria	Rhizobiales	Rhizobiaceae	Unclassified	Unclassified	0	0	0	0	1	0	0	0	0	0	0	0	0	0	0	0	0	0	0	0	0	0	0	0
OTU_3008	Bacteria	Chloroflexi	Anaerolineae	Anaerolineales	Anaerolineaceae	uncultured	uncultured sludge bacterium H39	0	0	0	0	0	1	0	0	0	0	0	0	0	0	0	0	0	0	0	0	0	0	0	0
OTU_3011	Bacteria	Proteobacteria	Gammaproteobacteria	Legionellales	Legionellaceae	uncultured	uncultured gamma proteobacterium	0	0	0	0	0	1	0	0	0	0	0	0	0	0	0	0	0	0	0	0	0	0	0	0
OTU_3014	Bacteria	Proteobacteria	Deltaproteobacteria	Bdellovibrionales	Bacteriovoracaceae	Unclassified	Unclassified	0	0	0	0	0	1	0	0	0	0	0	0	0	0	0	0	0	0	0	0	0	0	0	0
OTU_3022	Bacteria	Proteobacteria	Alphaproteobacteria	Rhodospirillales	Thalassospiraceae	Thalassospira	Unclassified	0	0	0	0	1	0	0	0	0	0	0	0	0	0	0	0	0	0	0	0	0	0	0	0
[truncated: 1,711 more rows]
