# Supplementary material for: Characterization of particle-associated and free-living bacterial and archaeal communities along the water columns of the South China Sea
Source: Copernicus journal article supplement (doi:10.5194/bg-18-113-2021), 2021-01-08
Supplement: Supplementary file 2 [file bg-18-113-2021-supplement.zip › 03 Supplementary_Table S2.xlsx]

## Sheet: Archaeal 16S rRNA Annotation
OTUId	Domain	Phylum	Class	Order	Family	Genus	Species	G3F50	G3F200	G3F1000	G3F2000	G3F3000	G3F4000	G3P50	G3P1000	J5F50	J5F200	J5F1000	J5F2000	J5F3000	J5F4000	J5P3000	G3P200	G3P2000	G3P4000	J5P50	J5P200	J5P1000	J5P2000
OTU_1026	Archaea	Nanoarchaeaeota	Woesearchaeia	marine metagenome	marine metagenome	marine metagenome	marine metagenome	0	0	0	0	0	0	0	0	0	0	0	0	0	0	0	0	0	0	0	2	0	0
OTU_1040	Archaea	Thaumarchaeota	Nitrososphaeria	Nitrosopumilales	Nitrosopumilaceae	marine metagenome	marine metagenome	0	0	0	0	0	0	0	0	0	0	0	1	1	0	0	0	0	0	0	0	0	0
OTU_1050	Archaea	Euryarchaeota	Thermoplasmata	Marine Group II	Unclassified	Unclassified	Unclassified	0	0	0	0	0	0	0	0	0	2	0	0	0	0	0	0	0	0	0	0	0	0
OTU_1051	Archaea	Thaumarchaeota	Nitrososphaeria	Nitrosopumilales	Nitrosopumilaceae	Candidatus Nitrosopelagicus	uncultured thaumarchaeote	0	0	0	0	0	0	0	0	0	0	0	0	0	0	0	0	1	0	1	0	0	0
OTU_1053	Archaea	Thaumarchaeota	Nitrososphaeria	Nitrosopumilales	Nitrosopumilaceae	Candidatus Nitrosopelagicus	marine metagenome	0	0	0	0	0	0	0	0	0	0	0	0	0	0	0	0	0	0	2	0	0	0
OTU_1057	Archaea	Euryarchaeota	Methanomicrobia	Methanosarcinales	Methanosaetaceae	Methanosaeta	Unclassified	0	0	0	0	0	0	0	0	0	0	0	0	0	0	0	0	0	0	2	0	0	0
OTU_1058	Archaea	Euryarchaeota	Thermoplasmata	Marine Group III	uncultured marine archaeon	uncultured marine archaeon	uncultured marine archaeon	0	2	0	0	0	0	0	0	0	0	0	0	0	0	0	0	0	0	0	0	0	0
OTU_1060	Archaea	Euryarchaeota	Thermoplasmata	Marine Group III	Unclassified	Unclassified	Unclassified	2	0	0	0	0	0	0	0	0	0	0	0	0	0	0	0	0	0	0	0	0	0
OTU_1063	Archaea	Euryarchaeota	Thermoplasmata	Marine Group II	Unclassified	Unclassified	Unclassified	0	0	0	0	0	0	0	0	0	0	2	0	0	0	0	0	0	0	0	0	0	0
OTU_1079	Archaea	Thaumarchaeota	Nitrososphaeria	Nitrosopumilales	Nitrosopumilaceae	marine metagenome	marine metagenome	0	0	0	0	0	0	0	0	0	0	0	0	0	0	1	0	1	0	0	0	0	0
OTU_1089	Archaea	Euryarchaeota	Thermoplasmata	Marine Group II	seawater metagenome	seawater metagenome	seawater metagenome	0	0	0	1	0	0	0	0	0	0	0	0	0	1	0	0	0	0	0	0	0	0
OTU_1092	Archaea	Thaumarchaeota	Nitrososphaeria	Nitrosopumilales	Nitrosopumilaceae	Candidatus Nitrosopelagicus	uncultured archaeon	0	0	0	0	0	0	0	0	0	0	0	0	0	0	0	1	0	0	0	1	0	0
OTU_1116	Archaea	Thaumarchaeota	Nitrososphaeria	Nitrosopumilales	Nitrosopumilaceae	Candidatus Nitrosopelagicus	Unclassified	0	0	0	0	0	0	0	0	0	0	0	0	0	0	0	2	0	0	0	0	0	0
OTU_1118	Archaea	Thaumarchaeota	Nitrososphaeria	Nitrosopumilales	Nitrosopumilaceae	marine metagenome	marine metagenome	0	0	0	0	0	0	0	0	0	0	0	0	0	0	2	0	0	0	0	0	0	0
OTU_1119	Archaea	Thaumarchaeota	Nitrososphaeria	Nitrosopumilales	Nitrosopumilaceae	Unclassified	Unclassified	0	0	0	0	0	0	0	0	0	0	0	0	0	0	0	2	0	0	0	0	0	0
OTU_1122	Archaea	Thaumarchaeota	Nitrososphaeria	Nitrosopumilales	Nitrosopumilaceae	Unclassified	Unclassified	0	0	1	0	0	0	0	0	0	0	0	0	0	0	0	0	1	0	0	0	0	0
OTU_153	Archaea	Thaumarchaeota	Nitrososphaeria	Nitrosopumilales	Nitrosopumilaceae	Unclassified	Unclassified	0	0	0	0	0	0	0	0	0	0	0	0	0	0	0	2	0	0	0	0	0	0
OTU_165	Archaea	Euryarchaeota	Thermoplasmata	Marine Group III	uncultured marine archaeon	uncultured marine archaeon	uncultured marine archaeon	0	0	0	0	0	0	0	0	0	0	2	0	0	0	0	0	0	0	0	0	0	0
OTU_180	Archaea	Euryarchaeota	Thermoplasmata	Marine Group III	uncultured marine archaeon	uncultured marine archaeon	uncultured marine archaeon	0	0	0	0	0	0	0	1	0	0	1	0	0	0	0	0	0	0	0	0	0	0
OTU_192	Archaea	Euryarchaeota	Thermoplasmata	Marine Group II	uncultured marine group II/III euryarchaeote AD1000_31_C10	uncultured marine group II/III euryarchaeote AD1000_31_C10	uncultured marine group II/III euryarchaeote AD1000_31_C10	0	0	0	0	0	0	0	0	0	0	0	0	0	0	0	0	0	0	0	0	2	0
OTU_204	Archaea	Thaumarchaeota	Nitrososphaeria	Nitrosopumilales	Nitrosopumilaceae	Unclassified	Unclassified	0	0	0	0	0	0	0	0	0	0	0	0	0	0	0	0	1	0	0	0	0	1
OTU_211	Archaea	Thaumarchaeota	Marine Benthic Group A	uncultured marine archaeon	uncultured marine archaeon	uncultured marine archaeon	uncultured marine archaeon	0	0	0	0	0	0	0	0	0	0	0	0	0	0	1	0	0	0	0	0	0	1
OTU_236	Archaea	Euryarchaeota	Thermoplasmata	Marine Group II	uncultured marine group II euryarchaeote HF130_40G09	uncultured marine group II euryarchaeote HF130_40G09	uncultured marine group II euryarchaeote HF130_40G09	0	1	0	0	0	0	0	0	0	1	0	0	0	0	0	0	0	0	0	0	0	0
OTU_238	Archaea	Euryarchaeota	Thermoplasmata	Marine Group II	Marine group II euryarchaeote REDSEA-S19_B7N8	Marine group II euryarchaeote REDSEA-S19_B7N8	Marine group II euryarchaeote REDSEA-S19_B7N8	1	0	0	0	0	0	0	0	1	0	0	0	0	0	0	0	0	0	0	0	0	0
OTU_239	Archaea	Thaumarchaeota	Nitrososphaeria	Nitrosopumilales	Nitrosopumilaceae	uncultured marine group I thaumarchaeote	uncultured marine group I thaumarchaeote	0	0	0	0	0	0	0	0	0	0	0	0	0	2	0	0	0	0	0	0	0	0
OTU_257	Archaea	Thaumarchaeota	Nitrososphaeria	Nitrosopumilales	Nitrosopumilaceae	uncultured marine archaeon	uncultured marine archaeon	0	0	0	0	0	0	0	0	0	0	0	1	1	0	0	0	0	0	0	0	0	0
OTU_280	Archaea	Thaumarchaeota	Nitrososphaeria	Nitrosopumilales	Nitrosopumilaceae	Unclassified	Unclassified	0	1	0	0	0	0	0	0	0	1	0	0	0	0	0	0	0	0	0	0	0	0
OTU_305	Archaea	Euryarchaeota	Thermoplasmata	Marine Group II	uncultured marine group II/III euryarchaeote AD1000_31_C10	uncultured marine group II/III euryarchaeote AD1000_31_C10	uncultured marine group II/III euryarchaeote AD1000_31_C10	0	2	0	0	0	0	0	0	0	0	0	0	0	0	0	0	0	0	0	0	0	0
OTU_306	Archaea	Nanoarchaeaeota	Woesearchaeia	uncultured archaeon	uncultured archaeon	uncultured archaeon	uncultured archaeon	0	0	0	0	0	0	0	0	0	0	0	0	0	2	0	0	0	0	0	0	0	0
OTU_313	Archaea	Thaumarchaeota	Nitrososphaeria	Nitrosopumilales	Nitrosopumilaceae	marine metagenome	marine metagenome	0	0	0	0	1	0	0	0	0	0	0	0	0	0	0	0	0	0	0	0	0	1
OTU_316	Archaea	Euryarchaeota	Thermoplasmata	Marine Group II	marine metagenome	marine metagenome	marine metagenome	2	0	0	0	0	0	0	0	0	0	0	0	0	0	0	0	0	0	0	0	0	0
OTU_322	Archaea	Thaumarchaeota	Marine Benthic Group A	uncultured marine archaeon	uncultured marine archaeon	uncultured marine archaeon	uncultured marine archaeon	0	0	0	0	0	0	0	1	0	0	0	0	0	0	0	0	0	0	0	0	0	1
OTU_360	Archaea	Nanoarchaeaeota	Woesearchaeia	Unclassified	Unclassified	Unclassified	Unclassified	0	0	0	0	0	0	0	0	0	0	0	0	0	2	0	0	0	0	0	0	0	0
OTU_364	Archaea	Thaumarchaeota	Nitrososphaeria	Nitrosopumilales	Nitrosopumilaceae	Unclassified	Unclassified	0	0	0	0	1	0	0	0	0	0	0	0	0	0	0	0	1	0	0	0	0	0
OTU_365	Archaea	Thaumarchaeota	Marine Benthic Group A	uncultured marine archaeon	uncultured marine archaeon	uncultured marine archaeon	uncultured marine archaeon	0	0	0	0	0	0	0	0	0	0	0	0	0	0	2	0	0	0	0	0	0	0
OTU_407	Archaea	Euryarchaeota	Methanomicrobia	Methanosarcinales	Methanosaetaceae	Methanosaeta	metagenome	0	0	0	0	0	0	0	0	0	0	0	0	0	0	1	0	0	0	1	0	0	0
OTU_413	Archaea	Thaumarchaeota	Nitrososphaeria	Nitrosopumilales	Nitrosopumilaceae	Unclassified	Unclassified	0	2	0	0	0	0	0	0	0	0	0	0	0	0	0	0	0	0	0	0	0	0
OTU_415	Archaea	Nanoarchaeaeota	Woesearchaeia	uncultured euryarchaeote	uncultured euryarchaeote	uncultured euryarchaeote	uncultured euryarchaeote	0	0	0	2	0	0	0	0	0	0	0	0	0	0	0	0	0	0	0	0	0	0
OTU_420	Archaea	Euryarchaeota	Thermoplasmata	Marine Group III	uncultured marine archaeon	uncultured marine archaeon	uncultured marine archaeon	0	0	0	0	0	0	0	2	0	0	0	0	0	0	0	0	0	0	0	0	0	0
OTU_427	Archaea	Euryarchaeota	Thermoplasmata	Marine Group II	Unclassified	Unclassified	Unclassified	0	0	0	0	0	0	0	0	2	0	0	0	0	0	0	0	0	0	0	0	0	0
OTU_444	Archaea	Thaumarchaeota	Nitrososphaeria	Nitrosopumilales	Nitrosopumilaceae	marine metagenome	marine metagenome	0	0	0	0	0	0	0	0	0	0	0	0	0	0	1	0	0	0	0	0	0	1
OTU_449	Archaea	Thaumarchaeota	Nitrososphaeria	Nitrosopumilales	Nitrosopumilaceae	uncultured thaumarchaeote	uncultured thaumarchaeote	0	0	0	0	0	0	0	0	0	1	0	0	0	0	0	1	0	0	0	0	0	0
OTU_460	Archaea	Thaumarchaeota	Nitrososphaeria	Nitrosopumilales	Nitrosopumilaceae	Candidatus Nitrosopelagicus	uncultured archaeon	0	0	0	0	0	0	0	0	0	0	0	0	0	0	0	1	0	0	0	1	0	0
OTU_467	Archaea	Thaumarchaeota	Nitrososphaeria	Nitrosopumilales	Nitrosopumilaceae	Unclassified	Unclassified	0	1	0	0	0	0	0	0	0	0	0	0	0	0	0	1	0	0	0	0	0	0
OTU_473	Archaea	Euryarchaeota	Thermoplasmata	Marine Group III	Marine Group III euryarchaeote SCGC AAA288-E19	Marine Group III euryarchaeote SCGC AAA288-E19	Marine Group III euryarchaeote SCGC AAA288-E19	0	0	0	0	0	0	0	0	0	0	0	2	0	0	0	0	0	0	0	0	0	0
OTU_477	Archaea	Thaumarchaeota	Nitrososphaeria	Nitrosopumilales	Nitrosopumilaceae	Unclassified	Unclassified	0	0	1	0	0	0	0	0	0	0	0	0	1	0	0	0	0	0	0	0	0	0
OTU_486	Archaea	Euryarchaeota	Methanomicrobia	Methanosarcinales	Methanosaetaceae	Methanosaeta	uncultured euryarchaeote	0	0	0	0	0	0	0	0	0	0	0	0	0	0	0	0	0	0	2	0	0	0
OTU_494	Archaea	Thaumarchaeota	Nitrososphaeria	Nitrosopumilales	Nitrosopumilaceae	Candidatus Nitrosopumilus	uncultured marine group I thaumarchaeote	0	0	0	0	0	0	0	0	0	0	2	0	0	0	0	0	0	0	0	0	0	0
OTU_495	Archaea	Euryarchaeota	Thermoplasmata	Marine Group II	uncultured marine archaeon	uncultured marine archaeon	uncultured marine archaeon	0	0	0	0	0	0	0	0	2	0	0	0	0	0	0	0	0	0	0	0	0	0
OTU_501	Archaea	Nanoarchaeaeota	Woesearchaeia	uncultured euryarchaeote	uncultured euryarchaeote	uncultured euryarchaeote	uncultured euryarchaeote	0	0	0	0	0	0	0	0	0	0	0	0	0	0	0	0	0	0	2	0	0	0
OTU_516	Archaea	Euryarchaeota	Thermoplasmata	Marine Group III	uncultured marine archaeon	uncultured marine archaeon	uncultured marine archaeon	1	0	0	0	0	0	1	0	0	0	0	0	0	0	0	0	0	0	0	0	0	0
OTU_518	Archaea	Euryarchaeota	Thermoplasmata	Marine Group II	uncultured marine archaeon	uncultured marine archaeon	uncultured marine archaeon	0	0	0	0	0	0	0	2	0	0	0	0	0	0	0	0	0	0	0	0	0	0
OTU_521	Archaea	Euryarchaeota	Thermoplasmata	Marine Group II	Marine group II euryarchaeote REDSEA-S03_B6	Marine group II euryarchaeote REDSEA-S03_B6	Marine group II euryarchaeote REDSEA-S03_B6	0	0	0	0	0	0	2	0	0	0	0	0	0	0	0	0	0	0	0	0	0	0
OTU_527	Archaea	Euryarchaeota	Thermoplasmata	Marine Group II	Unclassified	Unclassified	Unclassified	0	2	0	0	0	0	0	0	0	0	0	0	0	0	0	0	0	0	0	0	0	0
OTU_529	Archaea	Euryarchaeota	Thermoplasmata	Marine Group II	Unclassified	Unclassified	Unclassified	0	0	0	0	0	0	0	0	2	0	0	0	0	0	0	0	0	0	0	0	0	0
OTU_547	Archaea	Euryarchaeota	Thermoplasmata	Marine Group III	uncultured marine archaeon	uncultured marine archaeon	uncultured marine archaeon	0	0	0	0	0	0	0	1	0	0	1	0	0	0	0	0	0	0	0	0	0	0
OTU_567	Archaea	Thaumarchaeota	Nitrososphaeria	Nitrosopumilales	Nitrosopumilaceae	marine metagenome	marine metagenome	0	0	0	1	0	0	0	0	0	0	0	0	0	0	0	0	0	1	0	0	0	0
OTU_568	Archaea	Euryarchaeota	Thermoplasmata	Marine Group II	metagenome	metagenome	metagenome	0	0	0	0	0	0	0	0	0	0	0	0	0	0	0	0	0	0	2	0	0	0
OTU_572	Archaea	Euryarchaeota	Thermoplasmata	Marine Group III	uncultured marine archaeon	uncultured marine archaeon	uncultured marine archaeon	0	0	0	0	0	0	0	1	0	0	1	0	0	0	0	0	0	0	0	0	0	0
OTU_579	Archaea	Euryarchaeota	Thermoplasmata	Marine Group II	uncultured marine group II euryarchaeote	uncultured marine group II euryarchaeote	uncultured marine group II euryarchaeote	0	0	0	0	0	2	0	0	0	0	0	0	0	0	0	0	0	0	0	0	0	0
OTU_600	Archaea	Euryarchaeota	Methanomicrobia	Methanosarcinales	Methanosarcinaceae	Methanosarcina	uncultured Methanosarcina sp.	0	0	0	0	0	0	0	0	0	0	0	0	0	0	0	0	0	0	2	0	0	0
OTU_605	Archaea	Unclassified	Unclassified	Unclassified	Unclassified	Unclassified	Unclassified	0	0	0	0	0	0	0	0	0	0	0	0	0	0	0	0	0	0	2	0	0	0
OTU_607	Archaea	Thaumarchaeota	Nitrososphaeria	Nitrosopumilales	Nitrosopumilaceae	uncultured marine archaeon	uncultured marine archaeon	0	0	0	0	0	1	0	0	0	0	0	0	0	0	0	0	0	0	0	1	0	0
OTU_608	Archaea	Euryarchaeota	Thermoplasmata	Marine Group II	uncultured archaeon	uncultured archaeon	uncultured archaeon	0	0	0	0	0	2	0	0	0	0	0	0	0	0	0	0	0	0	0	0	0	0
OTU_613	Archaea	Thaumarchaeota	Nitrososphaeria	Nitrosopumilales	Nitrosopumilaceae	uncultured marine archaeon	uncultured marine archaeon	0	0	0	0	0	0	0	0	0	0	0	0	0	0	0	1	0	0	0	1	0	0
OTU_625	Archaea	Euryarchaeota	Thermoplasmata	Marine Group II	uncultured archaeon	uncultured archaeon	uncultured archaeon	2	0	0	0	0	0	0	0	0	0	0	0	0	0	0	0	0	0	0	0	0	0
OTU_628	Archaea	Euryarchaeota	Halobacteria	Halobacteriales	Haloferacaceae	Natronococcus	Unclassified	0	0	0	0	0	0	0	0	0	0	0	0	0	0	0	0	0	0	0	0	2	0
OTU_639	Archaea	Thaumarchaeota	Nitrososphaeria	Nitrosopumilales	Nitrosopumilaceae	Candidatus Nitrosopelagicus	uncultured archaeon	0	0	0	0	0	0	0	0	0	1	0	0	0	0	0	0	0	0	0	1	0	0
OTU_642	Archaea	Euryarchaeota	Thermoplasmata	Marine Group II	uncultured marine group II euryarchaeote	uncultured marine group II euryarchaeote	uncultured marine group II euryarchaeote	0	0	0	0	0	1	0	0	0	0	0	0	0	1	0	0	0	0	0	0	0	0
OTU_660	Archaea	Thaumarchaeota	Nitrososphaeria	Nitrosopumilales	Nitrosopumilaceae	Unclassified	Unclassified	0	0	0	0	0	0	0	0	0	0	0	0	0	0	2	0	0	0	0	0	0	0
OTU_665	Archaea	Euryarchaeota	Thermoplasmata	Marine Group III	uncultured marine group II/III euryarchaeote KM3_133_A04	uncultured marine group II/III euryarchaeote KM3_133_A04	uncultured marine group II/III euryarchaeote KM3_133_A04	0	0	0	0	0	0	0	0	0	0	0	0	0	0	0	0	0	0	0	0	2	0
OTU_681	Archaea	Thaumarchaeota	Nitrososphaeria	Nitrosopumilales	Nitrosopumilaceae	marine metagenome	marine metagenome	0	0	0	0	0	0	0	0	0	0	0	0	0	0	2	0	0	0	0	0	0	0
OTU_689	Archaea	Thaumarchaeota	Nitrososphaeria	Nitrosopumilales	Nitrosopumilaceae	marine metagenome	marine metagenome	0	0	0	0	0	0	0	0	0	0	0	0	2	0	0	0	0	0	0	0	0	0
OTU_698	Archaea	Euryarchaeota	Thermoplasmata	Marine Group II	Unclassified	Unclassified	Unclassified	0	0	0	0	0	0	0	0	0	2	0	0	0	0	0	0	0	0	0	0	0	0
OTU_714	Archaea	Euryarchaeota	Thermoplasmata	Marine Group II	marine metagenome	marine metagenome	marine metagenome	1	0	0	0	0	0	0	0	0	1	0	0	0	0	0	0	0	0	0	0	0	0
OTU_724	Archaea	Euryarchaeota	Thermoplasmata	Marine Group II	metagenome	metagenome	metagenome	2	0	0	0	0	0	0	0	0	0	0	0	0	0	0	0	0	0	0	0	0	0
OTU_742	Archaea	Unclassified	Unclassified	Unclassified	Unclassified	Unclassified	Unclassified	0	0	0	0	0	0	0	0	0	0	0	0	0	0	2	0	0	0	0	0	0	0
OTU_746	Archaea	Euryarchaeota	Thermoplasmata	Marine Group III	marine metagenome	marine metagenome	marine metagenome	0	0	0	0	0	0	0	0	0	0	2	0	0	0	0	0	0	0	0	0	0	0
OTU_747	Archaea	Nanoarchaeaeota	Woesearchaeia	uncultured euryarchaeote	uncultured euryarchaeote	uncultured euryarchaeote	uncultured euryarchaeote	0	0	0	0	0	0	0	0	0	0	0	0	0	2	0	0	0	0	0	0	0	0
OTU_748	Archaea	Euryarchaeota	Thermoplasmata	Marine Group II	Unclassified	Unclassified	Unclassified	0	1	0	0	0	0	0	0	0	1	0	0	0	0	0	0	0	0	0	0	0	0
OTU_750	Archaea	Thaumarchaeota	Nitrososphaeria	Nitrosopumilales	Nitrosopumilaceae	marine metagenome	marine metagenome	0	0	0	0	0	1	0	0	0	0	0	0	0	0	0	0	0	1	0	0	0	0
OTU_755	Archaea	Unclassified	Unclassified	Unclassified	Unclassified	Unclassified	Unclassified	0	0	0	0	0	0	0	2	0	0	0	0	0	0	0	0	0	0	0	0	0	0
OTU_765	Archaea	Euryarchaeota	Thermoplasmata	Marine Group III	Marine Group III euryarchaeote SCGC AAA288-E19	Marine Group III euryarchaeote SCGC AAA288-E19	Marine Group III euryarchaeote SCGC AAA288-E19	0	0	0	1	1	0	0	0	0	0	0	0	0	0	0	0	0	0	0	0	0	0
OTU_767	Archaea	Thaumarchaeota	Nitrososphaeria	Nitrosopumilales	Nitrosopumilaceae	uncultured marine archaeon	uncultured marine archaeon	0	0	0	1	0	1	0	0	0	0	0	0	0	0	0	0	0	0	0	0	0	0
OTU_784	Archaea	Nanoarchaeaeota	Woesearchaeia	uncultured euryarchaeote	uncultured euryarchaeote	uncultured euryarchaeote	uncultured euryarchaeote	0	0	0	2	0	0	0	0	0	0	0	0	0	0	0	0	0	0	0	0	0	0
OTU_785	Archaea	Thaumarchaeota	Nitrososphaeria	Nitrosopumilales	Nitrosopumilaceae	uncultured archaeon	uncultured archaeon	0	0	0	1	0	1	0	0	0	0	0	0	0	0	0	0	0	0	0	0	0	0
OTU_786	Archaea	Unclassified	Unclassified	Unclassified	Unclassified	Unclassified	Unclassified	0	0	0	0	0	0	0	0	0	0	0	0	0	0	1	0	0	0	0	1	0	0
OTU_787	Archaea	Euryarchaeota	Methanomicrobia	Methanosarcinales	Methanosaetaceae	Methanosaeta	metagenome	0	0	0	0	0	0	0	0	0	0	0	0	0	0	0	0	1	0	1	0	0	0
OTU_791	Archaea	Thaumarchaeota	Marine Benthic Group A	uncultured marine crenarchaeote KM3-153-F8	uncultured marine crenarchaeote KM3-153-F8	uncultured marine crenarchaeote KM3-153-F8	uncultured marine crenarchaeote KM3-153-F8	0	0	0	0	0	0	0	0	0	0	0	2	0	0	0	0	0	0	0	0	0	0
OTU_798	Archaea	Thaumarchaeota	Nitrososphaeria	Nitrosopumilales	Nitrosopumilaceae	uncultured thaumarchaeote	uncultured thaumarchaeote	0	0	0	0	0	0	0	0	0	0	0	0	0	0	0	0	2	0	0	0	0	0
OTU_811	Archaea	Thaumarchaeota	Nitrososphaeria	uncultured	uncultured archaeon	uncultured archaeon	uncultured archaeon	0	0	2	0	0	0	0	0	0	0	0	0	0	0	0	0	0	0	0	0	0	0
OTU_815	Archaea	Euryarchaeota	Thermoplasmata	Marine Group II	uncultured marine group II/III euryarchaeote AD1000_31_C10	uncultured marine group II/III euryarchaeote AD1000_31_C10	uncultured marine group II/III euryarchaeote AD1000_31_C10	0	0	0	0	0	0	0	0	0	0	0	0	0	0	0	0	0	1	0	0	0	1
OTU_816	Archaea	Thaumarchaeota	Nitrososphaeria	Nitrosopumilales	Nitrosopumilaceae	Unclassified	Unclassified	0	0	2	0	0	0	0	0	0	0	0	0	0	0	0	0	0	0	0	0	0	0
OTU_819	Archaea	Euryarchaeota	Thermoplasmata	Marine Group II	uncultured marine group II/III euryarchaeote AD1000_31_C10	uncultured marine group II/III euryarchaeote AD1000_31_C10	uncultured marine group II/III euryarchaeote AD1000_31_C10	0	0	0	0	0	2	0	0	0	0	0	0	0	0	0	0	0	0	0	0	0	0
OTU_821	Archaea	Euryarchaeota	Thermoplasmata	Marine Group III	Unclassified	Unclassified	Unclassified	0	0	0	0	0	0	1	0	1	0	0	0	0	0	0	0	0	0	0	0	0	0
OTU_823	Archaea	Thaumarchaeota	Nitrososphaeria	Nitrosopumilales	Nitrosopumilaceae	Unclassified	Unclassified	0	0	0	0	0	0	0	0	0	0	0	0	0	0	0	1	1	0	0	0	0	0
OTU_851	Archaea	Thaumarchaeota	Nitrososphaeria	Nitrosopumilales	Nitrosopumilaceae	uncultured marine archaeon	uncultured marine archaeon	0	0	0	1	0	0	0	0	0	0	0	0	0	0	0	0	0	0	0	1	0	0
OTU_853	Archaea	Nanoarchaeaeota	Woesearchaeia	uncultured euryarchaeote	uncultured euryarchaeote	uncultured euryarchaeote	uncultured euryarchaeote	0	0	0	0	0	2	0	0	0	0	0	0	0	0	0	0	0	0	0	0	0	0
OTU_861	Archaea	Euryarchaeota	Thermoplasmata	Marine Group II	Unclassified	Unclassified	Unclassified	2	0	0	0	0	0	0	0	0	0	0	0	0	0	0	0	0	0	0	0	0	0
OTU_863	Archaea	Thaumarchaeota	Nitrososphaeria	Nitrosopumilales	Nitrosopumilaceae	Unclassified	Unclassified	0	0	0	1	0	0	0	0	0	0	0	0	0	0	0	0	1	0	0	0	0	0
OTU_867	Archaea	Thaumarchaeota	Nitrososphaeria	Nitrosopumilales	Nitrosopumilaceae	Unclassified	Unclassified	0	0	0	0	0	0	0	0	0	0	0	0	0	0	2	0	0	0	0	0	0	0
OTU_872	Archaea	Thaumarchaeota	Nitrososphaeria	Nitrosopumilales	Nitrosopumilaceae	Candidatus Nitrosopumilus	uncultured marine group I thaumarchaeote	0	0	1	1	0	0	0	0	0	0	0	0	0	0	0	0	0	0	0	0	0	0
OTU_875	Archaea	Euryarchaeota	Thermoplasmata	Marine Group II	uncultured marine group II/III euryarchaeote AD1000_31_C10	uncultured marine group II/III euryarchaeote AD1000_31_C10	uncultured marine group II/III euryarchaeote AD1000_31_C10	0	0	0	0	0	0	0	0	0	0	0	0	0	0	0	0	0	0	0	0	0	2
OTU_879	Archaea	Thaumarchaeota	Nitrososphaeria	Nitrosopumilales	Nitrosopumilaceae	Unclassified	Unclassified	0	0	0	0	0	0	0	0	0	0	0	0	0	0	0	1	0	0	0	1	0	0
OTU_882	Archaea	Euryarchaeota	Thermoplasmata	Marine Group II	Marine group II euryarchaeote REDSEA-S19_B7N8	Marine group II euryarchaeote REDSEA-S19_B7N8	Marine group II euryarchaeote REDSEA-S19_B7N8	1	0	0	0	0	0	0	0	1	0	0	0	0	0	0	0	0	0	0	0	0	0
OTU_890	Archaea	Euryarchaeota	Halobacteria	Halobacteriales	Halomicrobiaceae	uncultured	marine metagenome	0	0	0	0	0	0	0	0	0	1	0	0	0	0	0	0	0	0	0	1	0	0
OTU_893	Archaea	Thaumarchaeota	Nitrososphaeria	Nitrosopumilales	Nitrosopumilaceae	Unclassified	Unclassified	0	0	0	0	0	0	0	0	0	0	1	1	0	0	0	0	0	0	0	0	0	0
OTU_905	Archaea	Euryarchaeota	Methanomicrobia	Methanosarcinales	Methanosaetaceae	Methanosaeta	Unclassified	0	0	0	0	0	0	0	0	0	0	0	0	0	0	0	0	0	0	2	0	0	0
OTU_912	Archaea	Unclassified	Unclassified	Unclassified	Unclassified	Unclassified	Unclassified	0	0	0	0	0	0	0	0	0	0	0	0	0	0	0	0	0	0	0	0	2	0
OTU_928	Archaea	Thaumarchaeota	Nitrososphaeria	Nitrosopumilales	Nitrosopumilaceae	Unclassified	Unclassified	0	0	0	0	0	0	0	0	0	0	0	0	0	0	0	0	0	0	0	2	0	0
OTU_930	Archaea	Thaumarchaeota	Nitrososphaeria	Nitrosopumilales	Nitrosopumilaceae	Candidatus Nitrosopumilus	uncultured marine group I thaumarchaeote	0	0	0	0	0	0	0	0	0	0	0	0	0	0	0	0	2	0	0	0	0	0
OTU_952	Archaea	Thaumarchaeota	Nitrososphaeria	Nitrosopumilales	Nitrosopumilaceae	marine metagenome	marine metagenome	0	0	0	0	0	0	0	2	0	0	0	0	0	0	0	0	0	0	0	0	0	0
OTU_953	Archaea	Euryarchaeota	Thermoplasmata	Marine Group III	uncultured marine archaeon	uncultured marine archaeon	uncultured marine archaeon	0	0	0	0	0	1	0	1	0	0	0	0	0	0	0	0	0	0	0	0	0	0
OTU_955	Archaea	Euryarchaeota	Thermoplasmata	Marine Group III	Marine Group III euryarchaeote SCGC AAA288-E19	Marine Group III euryarchaeote SCGC AAA288-E19	Marine Group III euryarchaeote SCGC AAA288-E19	0	0	1	0	0	0	0	1	0	0	0	0	0	0	0	0	0	0	0	0	0	0
OTU_962	Archaea	Euryarchaeota	Thermoplasmata	Marine Group II	Marine group II euryarchaeote REDSEA-S03_B6	Marine group II euryarchaeote REDSEA-S03_B6	Marine group II euryarchaeote REDSEA-S03_B6	0	0	0	0	0	0	0	0	2	0	0	0	0	0	0	0	0	0	0	0	0	0
OTU_966	Archaea	Thaumarchaeota	Nitrososphaeria	Nitrosopumilales	Nitrosopumilaceae	Unclassified	Unclassified	0	1	0	0	0	0	0	0	0	0	0	0	0	0	0	0	0	0	0	1	0	0
OTU_967	Archaea	Nanoarchaeaeota	Woesearchaeia	uncultured euryarchaeote	uncultured euryarchaeote	uncultured euryarchaeote	uncultured euryarchaeote	0	0	0	0	0	0	0	2	0	0	0	0	0	0	0	0	0	0	0	0	0	0
OTU_968	Archaea	Nanoarchaeaeota	Woesearchaeia	uncultured euryarchaeote	uncultured euryarchaeote	uncultured euryarchaeote	uncultured euryarchaeote	0	0	0	0	2	0	0	0	0	0	0	0	0	0	0	0	0	0	0	0	0	0
OTU_969	Archaea	Euryarchaeota	Thermoplasmata	Marine Group II	seawater metagenome	seawater metagenome	seawater metagenome	0	0	0	0	0	1	0	0	0	0	0	0	0	1	0	0	0	0	0	0	0	0
OTU_976	Archaea	Euryarchaeota	Thermoplasmata	Marine Group II	uncultured marine group II euryarchaeote HF200_50D06	uncultured marine group II euryarchaeote HF200_50D06	uncultured marine group II euryarchaeote HF200_50D06	1	0	0	0	0	0	0	0	1	0	0	0	0	0	0	0	0	0	0	0	0	0
OTU_977	Archaea	Euryarchaeota	Thermoplasmata	Marine Group II	uncultured marine group II/III euryarchaeote AD1000_31_C10	uncultured marine group II/III euryarchaeote AD1000_31_C10	uncultured marine group II/III euryarchaeote AD1000_31_C10	0	0	0	0	0	0	0	0	0	0	0	0	0	0	0	0	0	2	0	0	0	0
OTU_980	Archaea	Euryarchaeota	Methanomicrobia	Methanosarcinales	Methanosaetaceae	Methanosaeta	Unclassified	0	0	0	0	0	0	0	0	0	0	0	0	0	0	0	0	0	0	2	0	0	0
OTU_990	Archaea	Thaumarchaeota	Nitrososphaeria	Nitrosopumilales	Nitrosopumilaceae	Candidatus Nitrosopelagicus	uncultured archaeon	0	0	0	0	0	0	0	0	0	1	0	0	0	0	0	0	0	0	0	1	0	0
OTU_993	Archaea	Euryarchaeota	Methanomicrobia	Methanosarcinales	Methanosaetaceae	Methanosaeta	metagenome	0	0	0	0	0	0	0	0	0	0	0	0	0	0	1	0	0	0	1	0	0	0
OTU_1007	Archaea	Euryarchaeota	Thermoplasmata	Marine Group II	uncultured marine group II/III euryarchaeote AD1000_09_E08	uncultured marine group II/III euryarchaeote AD1000_09_E08	uncultured marine group II/III euryarchaeote AD1000_09_E08	0	1	0	0	0	0	0	0	0	1	1	0	0	0	0	0	0	0	0	0	0	0
OTU_1028	Archaea	Thaumarchaeota	Marine Benthic Group A	uncultured marine crenarchaeote AD1000-325-A12	uncultured marine crenarchaeote AD1000-325-A12	uncultured marine crenarchaeote AD1000-325-A12	uncultured marine crenarchaeote AD1000-325-A12	0	0	0	0	0	0	0	0	0	0	0	0	0	0	0	1	0	0	0	2	0	0
OTU_1032	Archaea	Thaumarchaeota	Nitrososphaeria	Nitrosopumilales	Nitrosopumilaceae	uncultured marine archaeon	uncultured marine archaeon	0	0	1	0	0	0	0	0	0	1	1	0	0	0	0	0	0	0	0	0	0	0
OTU_1038	Archaea	Euryarchaeota	Thermoplasmata	Marine Group II	uncultured marine group II/III euryarchaeote AD1000_31_C10	uncultured marine group II/III euryarchaeote AD1000_31_C10	uncultured marine group II/III euryarchaeote AD1000_31_C10	0	0	0	0	0	0	0	0	0	0	0	0	0	0	0	0	0	0	0	0	3	0
OTU_1059	Archaea	Thaumarchaeota	Nitrososphaeria	Nitrosopumilales	Nitrosopumilaceae	Unclassified	Unclassified	0	0	0	0	0	0	0	0	0	0	0	0	0	0	0	1	2	0	0	0	0	0
OTU_1074	Archaea	Thaumarchaeota	Nitrososphaeria	Nitrosopumilales	Nitrosopumilaceae	Candidatus Nitrosopelagicus	marine metagenome	0	0	0	0	0	0	0	0	3	0	0	0	0	0	0	0	0	0	0	0	0	0
OTU_1100	Archaea	Thaumarchaeota	Nitrososphaeria	Nitrosopumilales	Nitrosopumilaceae	uncultured marine archaeon	uncultured marine archaeon	0	1	1	1	0	0	0	0	0	0	0	0	0	0	0	0	0	0	0	0	0	0
OTU_1103	Archaea	Thaumarchaeota	Nitrososphaeria	Nitrosopumilales	Nitrosopumilaceae	Unclassified	Unclassified	0	2	1	0	0	0	0	0	0	0	0	0	0	0	0	0	0	0	0	0	0	0
OTU_144	Archaea	Crenarchaeota	Unclassified	Unclassified	Unclassified	Unclassified	Unclassified	0	0	0	0	0	0	2	0	0	0	0	0	0	0	0	0	0	0	0	1	0	0
OTU_164	Archaea	Thaumarchaeota	Nitrososphaeria	Nitrosopumilales	Nitrosopumilaceae	Unclassified	Unclassified	0	0	0	0	0	0	0	0	0	3	0	0	0	0	0	0	0	0	0	0	0	0
OTU_172	Archaea	Unclassified	Unclassified	Unclassified	Unclassified	Unclassified	Unclassified	0	0	0	0	0	0	0	0	0	0	0	0	0	0	0	0	0	0	3	0	0	0
OTU_213	Archaea	Thaumarchaeota	Nitrososphaeria	Nitrosopumilales	Nitrosopumilaceae	uncultured archaeon	uncultured archaeon	0	0	0	0	0	0	0	0	0	1	0	0	0	0	0	2	0	0	0	0	0	0
OTU_215	Archaea	Thaumarchaeota	Nitrososphaeria	Nitrosopumilales	Nitrosopumilaceae	uncultured marine archaeon	uncultured marine archaeon	0	0	0	0	0	0	0	0	0	0	0	0	0	0	1	0	2	0	0	0	0	0
OTU_221	Archaea	Thaumarchaeota	Nitrososphaeria	Nitrosopumilales	Nitrosopumilaceae	Unclassified	Unclassified	0	0	0	0	0	0	0	0	0	0	0	0	0	0	0	1	1	0	0	1	0	0
OTU_270	Archaea	Thaumarchaeota	Marine Benthic Group A	uncultured thaumarchaeote	uncultured thaumarchaeote	uncultured thaumarchaeote	uncultured thaumarchaeote	0	0	0	0	0	1	0	0	0	0	2	0	0	0	0	0	0	0	0	0	0	0
OTU_276	Archaea	Unclassified	Unclassified	Unclassified	Unclassified	Unclassified	Unclassified	0	0	0	0	0	0	3	0	0	0	0	0	0	0	0	0	0	0	0	0	0	0
OTU_279	Archaea	Crenarchaeota	Crenarchaeota Incertae Sedis	Aigarchaeales	Geothermarchaeaceae	uncultured marine archaeon	uncultured marine archaeon	0	1	1	0	0	0	0	0	0	1	0	0	0	0	0	0	0	0	0	0	0	0
OTU_287	Archaea	Nanoarchaeaeota	Woesearchaeia	uncultured euryarchaeote	uncultured euryarchaeote	uncultured euryarchaeote	uncultured euryarchaeote	0	0	0	3	0	0	0	0	0	0	0	0	0	0	0	0	0	0	0	0	0	0
OTU_293	Archaea	Euryarchaeota	Thermoplasmata	Marine Group II	Unclassified	Unclassified	Unclassified	1	0	0	0	0	0	2	0	0	0	0	0	0	0	0	0	0	0	0	0	0	0
OTU_336	Archaea	Euryarchaeota	Thermoplasmata	Marine Group II	uncultured marine group II/III euryarchaeote AD1000_108_D01	uncultured marine group II/III euryarchaeote AD1000_108_D01	uncultured marine group II/III euryarchaeote AD1000_108_D01	0	0	0	0	1	0	0	0	0	2	0	0	0	0	0	0	0	0	0	0	0	0
OTU_349	Archaea	Thaumarchaeota	Nitrososphaeria	Nitrosopumilales	Nitrosopumilaceae	uncultured crenarchaeote ODPB-A7	uncultured crenarchaeote ODPB-A7	0	0	0	0	0	0	0	0	0	0	0	0	0	0	0	1	2	0	0	0	0	0
OTU_403	Archaea	Euryarchaeota	Thermoplasmata	Marine Group II	uncultured euryarchaeote	uncultured euryarchaeote	uncultured euryarchaeote	0	1	0	0	0	0	0	0	2	0	0	0	0	0	0	0	0	0	0	0	0	0
OTU_406	Archaea	Nanoarchaeaeota	Woesearchaeia	uncultured archaeon	uncultured archaeon	uncultured archaeon	uncultured archaeon	0	0	0	0	0	0	0	0	0	0	0	0	0	3	0	0	0	0	0	0	0	0
OTU_418	Archaea	Euryarchaeota	Thermoplasmata	Marine Group II	uncultured marine group II/III euryarchaeote AD1000_31_C10	uncultured marine group II/III euryarchaeote AD1000_31_C10	uncultured marine group II/III euryarchaeote AD1000_31_C10	0	1	1	0	0	1	0	0	0	0	0	0	0	0	0	0	0	0	0	0	0	0
OTU_424	Archaea	Thaumarchaeota	Nitrososphaeria	Nitrosopumilales	Nitrosopumilaceae	uncultured thaumarchaeote	uncultured thaumarchaeote	0	1	0	0	0	0	0	0	0	0	0	0	0	0	0	0	2	0	0	0	0	0
OTU_464	Archaea	Nanoarchaeaeota	Woesearchaeia	archaeon GW2011_AR17	archaeon GW2011_AR17	archaeon GW2011_AR17	archaeon GW2011_AR17	0	0	0	0	0	0	0	0	0	0	0	0	0	0	0	0	3	0	0	0	0	0
OTU_469	Archaea	Thaumarchaeota	Nitrososphaeria	Nitrosopumilales	Nitrosopumilaceae	Unclassified	Unclassified	0	0	0	0	0	0	0	0	0	0	0	0	0	0	0	2	0	0	0	1	0	0
OTU_470	Archaea	Thaumarchaeota	Marine Benthic Group A	uncultured marine crenarchaeote AD1000-325-A12	uncultured marine crenarchaeote AD1000-325-A12	uncultured marine crenarchaeote AD1000-325-A12	uncultured marine crenarchaeote AD1000-325-A12	0	0	0	0	0	0	0	0	0	0	0	0	0	0	0	3	0	0	0	0	0	0
OTU_484	Archaea	Thaumarchaeota	Nitrososphaeria	Nitrosopumilales	Nitrosopumilaceae	marine metagenome	marine metagenome	0	0	0	0	0	0	0	0	0	0	0	0	0	0	1	0	0	0	0	0	0	2
OTU_508	Archaea	Thaumarchaeota	Nitrososphaeria	Nitrosopumilales	Nitrosopumilaceae	Unclassified	Unclassified	0	0	0	0	0	0	0	0	0	0	0	0	3	0	0	0	0	0	0	0	0	0
OTU_512	Archaea	Unclassified	Unclassified	Unclassified	Unclassified	Unclassified	Unclassified	0	0	0	0	0	0	0	0	0	0	0	0	0	0	3	0	0	0	0	0	0	0
OTU_520	Archaea	Euryarchaeota	Thermoplasmata	Marine Group III	uncultured marine archaeon	uncultured marine archaeon	uncultured marine archaeon	0	0	0	0	0	0	0	3	0	0	0	0	0	0	0	0	0	0	0	0	0	0
OTU_551	Archaea	Euryarchaeota	Thermoplasmata	Marine Group III	Unclassified	Unclassified	Unclassified	0	0	0	0	0	0	0	0	0	0	0	0	0	0	0	0	0	0	0	0	3	0
OTU_585	Archaea	Nanoarchaeaeota	Woesearchaeia	uncultured euryarchaeote	uncultured euryarchaeote	uncultured euryarchaeote	uncultured euryarchaeote	0	0	0	0	0	0	0	0	0	0	0	0	0	3	0	0	0	0	0	0	0	0
OTU_589	Archaea	Nanoarchaeaeota	Woesearchaeia	uncultured euryarchaeote	uncultured euryarchaeote	uncultured euryarchaeote	uncultured euryarchaeote	0	1	0	0	0	0	0	0	0	2	0	0	0	0	0	0	0	0	0	0	0	0
OTU_597	Archaea	Euryarchaeota	Thermoplasmata	Marine Group II	Unclassified	Unclassified	Unclassified	0	1	0	0	0	0	0	0	0	2	0	0	0	0	0	0	0	0	0	0	0	0
OTU_606	Archaea	Nanoarchaeaeota	Woesearchaeia	marine metagenome	marine metagenome	marine metagenome	marine metagenome	0	0	0	0	0	0	0	0	0	0	0	3	0	0	0	0	0	0	0	0	0	0
OTU_643	Archaea	Euryarchaeota	Thermoplasmata	Marine Group III	Marine Group III euryarchaeote SCGC AAA288-E19	Marine Group III euryarchaeote SCGC AAA288-E19	Marine Group III euryarchaeote SCGC AAA288-E19	0	0	0	0	0	0	0	0	0	0	1	1	0	1	0	0	0	0	0	0	0	0
OTU_647	Archaea	Euryarchaeota	Thermoplasmata	Marine Group II	Unclassified	Unclassified	Unclassified	2	0	0	0	0	0	1	0	0	0	0	0	0	0	0	0	0	0	0	0	0	0
OTU_652	Archaea	Thaumarchaeota	Nitrososphaeria	Nitrosopumilales	Nitrosopumilaceae	Candidatus Nitrosopelagicus	marine metagenome	1	0	0	0	0	0	0	0	0	0	0	0	0	0	1	0	0	0	1	0	0	0
OTU_657	Archaea	Euryarchaeota	Thermococci	Methanofastidiosales	uncultured	marine metagenome	marine metagenome	0	0	0	1	0	0	0	0	0	0	0	0	2	0	0	0	0	0	0	0	0	0
OTU_659	Archaea	Thaumarchaeota	Nitrososphaeria	Nitrosopumilales	Nitrosopumilaceae	marine metagenome	marine metagenome	0	0	1	0	0	0	0	0	0	0	0	0	0	0	2	0	0	0	0	0	0	0
OTU_691	Archaea	Nanoarchaeaeota	Woesearchaeia	uncultured euryarchaeote	uncultured euryarchaeote	uncultured euryarchaeote	uncultured euryarchaeote	0	0	0	0	0	0	0	0	0	0	0	0	3	0	0	0	0	0	0	0	0	0
OTU_717	Archaea	Thaumarchaeota	Nitrososphaeria	Nitrosopumilales	Nitrosopumilaceae	marine metagenome	marine metagenome	0	0	0	2	0	1	0	0	0	0	0	0	0	0	0	0	0	0	0	0	0	0
OTU_727	Archaea	Euryarchaeota	Thermoplasmata	Marine Group II	uncultured marine group II euryarchaeote HF200_50D06	uncultured marine group II euryarchaeote HF200_50D06	uncultured marine group II euryarchaeote HF200_50D06	0	0	0	0	0	0	0	0	0	0	0	0	0	0	0	0	0	3	0	0	0	0
OTU_733	Archaea	Thaumarchaeota	Nitrososphaeria	Nitrosopumilales	Nitrosopumilaceae	uncultured archaeon	uncultured archaeon	0	0	0	0	0	0	0	0	0	0	0	0	0	0	0	0	1	0	0	2	0	0
OTU_739	Archaea	Thaumarchaeota	Nitrososphaeria	Nitrosopumilales	Nitrosopumilaceae	uncultured marine archaeon	uncultured marine archaeon	0	0	0	0	0	0	0	0	0	0	0	0	0	0	0	2	0	0	0	1	0	0
OTU_753	Archaea	Thaumarchaeota	Nitrososphaeria	Nitrosopumilales	Nitrosopumilaceae	marine metagenome	marine metagenome	0	0	0	1	0	0	0	1	0	0	0	0	0	1	0	0	0	0	0	0	0	0
OTU_788	Archaea	Euryarchaeota	Thermoplasmata	Marine Group III	Marine Group III euryarchaeote SCGC AAA288-E19	Marine Group III euryarchaeote SCGC AAA288-E19	Marine Group III euryarchaeote SCGC AAA288-E19	0	0	0	0	0	0	0	0	0	0	2	1	0	0	0	0	0	0	0	0	0	0
OTU_809	Archaea	Euryarchaeota	Methanomicrobia	Methanosarcinales	Methanosaetaceae	Methanosaeta	Unclassified	0	0	0	0	0	0	0	0	0	0	0	0	0	0	0	0	0	0	3	0	0	0
OTU_837	Archaea	Euryarchaeota	Thermoplasmata	Marine Group II	Unclassified	Unclassified	Unclassified	0	0	0	0	0	0	0	0	1	1	0	0	0	0	0	0	0	0	1	0	0	0
OTU_862	Archaea	Euryarchaeota	Thermoplasmata	Marine Group II	uncultured marine microorganism HF200_10-06-02	uncultured marine microorganism HF200_10-06-02	uncultured marine microorganism HF200_10-06-02	0	0	0	0	0	0	0	0	0	0	0	0	0	0	0	2	0	0	0	1	0	0
OTU_877	Archaea	Nanoarchaeaeota	Woesearchaeia	Unclassified	Unclassified	Unclassified	Unclassified	0	0	0	0	0	0	0	0	0	0	0	0	3	0	0	0	0	0	0	0	0	0
OTU_880	Archaea	Thaumarchaeota	Marine Benthic Group A	uncultured marine crenarchaeote AD1000-23-H12	uncultured marine crenarchaeote AD1000-23-H12	uncultured marine crenarchaeote AD1000-23-H12	uncultured marine crenarchaeote AD1000-23-H12	0	0	0	0	0	0	0	0	0	0	0	3	0	0	0	0	0	0	0	0	0	0
OTU_895	Archaea	Euryarchaeota	Thermoplasmata	Marine Group II	Marine group II euryarchaeote REDSEA-S19_B7N8	Marine group II euryarchaeote REDSEA-S19_B7N8	Marine group II euryarchaeote REDSEA-S19_B7N8	2	0	0	0	0	0	0	0	1	0	0	0	0	0	0	0	0	0	0	0	0	0
OTU_900	Archaea	Thaumarchaeota	Nitrososphaeria	Nitrosopumilales	Nitrosopumilaceae	Unclassified	Unclassified	0	0	0	0	0	0	0	0	0	0	0	0	3	0	0	0	0	0	0	0	0	0
OTU_917	Archaea	Euryarchaeota	Thermoplasmata	Marine Group II	uncultured marine group II/III euryarchaeote AD1000_31_C10	uncultured marine group II/III euryarchaeote AD1000_31_C10	uncultured marine group II/III euryarchaeote AD1000_31_C10	0	0	0	0	0	0	0	0	0	0	0	0	0	0	0	0	0	3	0	0	0	0
OTU_958	Archaea	Thaumarchaeota	Nitrososphaeria	Nitrosopumilales	Nitrosopumilaceae	uncultured archaeon	uncultured archaeon	0	0	0	0	0	0	0	0	0	0	0	0	0	0	0	0	0	0	0	3	0	0
OTU_973	Archaea	Euryarchaeota	Thermoplasmata	Marine Group III	uncultured marine archaeon	uncultured marine archaeon	uncultured marine archaeon	0	0	0	0	1	0	0	0	0	0	1	0	1	0	0	0	0	0	0	0	0	0
OTU_999	Archaea	Thaumarchaeota	Nitrososphaeria	Nitrosopumilales	Nitrosopumilaceae	Candidatus Nitrosopumilus	Unclassified	0	0	0	0	0	0	0	0	0	0	0	0	0	3	0	0	0	0	0	0	0	0
OTU_1003	Archaea	Euryarchaeota	Thermoplasmata	Marine Group III	Marine Group III euryarchaeote SCGC AAA288-E19	Marine Group III euryarchaeote SCGC AAA288-E19	Marine Group III euryarchaeote SCGC AAA288-E19	0	0	0	0	0	0	0	4	0	0	0	0	0	0	0	0	0	0	0	0	0	0
OTU_1016	Archaea	Thaumarchaeota	Marine Benthic Group A	uncultured marine crenarchaeote AD1000-325-A12	uncultured marine crenarchaeote AD1000-325-A12	uncultured marine crenarchaeote AD1000-325-A12	uncultured marine crenarchaeote AD1000-325-A12	0	0	2	0	1	0	0	0	0	0	0	0	0	0	0	1	0	0	0	0	0	0
OTU_1056	Archaea	Thaumarchaeota	Nitrososphaeria	Nitrosopumilales	Nitrosopumilaceae	Unclassified	Unclassified	0	0	1	1	0	0	0	1	0	0	0	0	0	0	0	0	0	0	0	1	0	0
OTU_1113	Archaea	Thaumarchaeota	Nitrososphaeria	Nitrosopumilales	Nitrosopumilaceae	Candidatus Nitrosopumilus	uncultured thaumarchaeote	0	0	0	0	0	0	0	0	1	0	0	0	0	0	0	1	0	0	1	1	0	0
OTU_118	Archaea	Unclassified	Unclassified	Unclassified	Unclassified	Unclassified	Unclassified	0	0	0	0	0	0	0	0	0	0	0	0	0	0	0	0	0	0	0	0	0	4
OTU_128	Archaea	Thaumarchaeota	Nitrososphaeria	Nitrosopumilales	Nitrosopumilaceae	Candidatus Nitrosopelagicus	uncultured archaeon	0	3	0	0	0	0	0	0	0	1	0	0	0	0	0	0	0	0	0	0	0	0
OTU_160	Archaea	Euryarchaeota	Thermoplasmata	Marine Group II	Unclassified	Unclassified	Unclassified	0	2	0	0	0	0	0	0	0	2	0	0	0	0	0	0	0	0	0	0	0	0
OTU_168	Archaea	Thaumarchaeota	Marine Benthic Group A	uncultured marine crenarchaeote AD1000-23-H12	uncultured marine crenarchaeote AD1000-23-H12	uncultured marine crenarchaeote AD1000-23-H12	uncultured marine crenarchaeote AD1000-23-H12	0	0	0	0	0	0	0	0	0	0	4	0	0	0	0	0	0	0	0	0	0	0
OTU_171	Archaea	Unclassified	Unclassified	Unclassified	Unclassified	Unclassified	Unclassified	0	0	0	0	0	0	0	0	0	0	0	0	0	0	0	0	0	0	0	4	0	0
OTU_188	Archaea	Thaumarchaeota	Nitrososphaeria	Nitrosopumilales	Nitrosopumilaceae	Unclassified	Unclassified	0	0	0	0	0	0	0	0	0	0	1	1	2	0	0	0	0	0	0	0	0	0
OTU_189	Archaea	Thaumarchaeota	Nitrososphaeria	Nitrosopumilales	Nitrosopumilaceae	uncultured marine archaeon	uncultured marine archaeon	0	0	0	1	2	0	0	0	0	0	0	0	0	0	0	0	0	1	0	0	0	0
OTU_216	Archaea	Euryarchaeota	Thermoplasmata	Marine Group II	uncultured marine group II/III euryarchaeote AD1000_31_C10	uncultured marine group II/III euryarchaeote AD1000_31_C10	uncultured marine group II/III euryarchaeote AD1000_31_C10	0	0	0	0	0	0	0	0	0	0	0	0	0	0	0	0	0	2	0	0	1	1
OTU_222	Archaea	Euryarchaeota	Thermoplasmata	Marine Group II	uncultured marine group II/III euryarchaeote AD1000_31_C10	uncultured marine group II/III euryarchaeote AD1000_31_C10	uncultured marine group II/III euryarchaeote AD1000_31_C10	0	0	0	0	0	0	0	0	0	0	0	0	0	0	0	0	0	0	0	0	1	3
OTU_265	Archaea	Thaumarchaeota	Nitrososphaeria	Nitrosopumilales	Nitrosopumilaceae	uncultured marine archaeon	uncultured marine archaeon	0	0	0	0	0	0	0	0	0	0	0	0	0	0	0	1	2	0	0	1	0	0
OTU_284	Archaea	Thaumarchaeota	Nitrososphaeria	Nitrosopumilales	Nitrosopumilaceae	uncultured marine archaeon	uncultured marine archaeon	0	0	0	1	0	2	0	0	0	0	0	0	0	0	1	0	0	0	0	0	0	0
OTU_379	Archaea	Nanoarchaeaeota	Woesearchaeia	uncultured euryarchaeote	uncultured euryarchaeote	uncultured euryarchaeote	uncultured euryarchaeote	0	0	0	0	0	0	0	0	0	0	1	2	0	1	0	0	0	0	0	0	0	0
OTU_408	Archaea	Thaumarchaeota	Nitrososphaeria	Nitrosopumilales	Nitrosopumilaceae	marine metagenome	marine metagenome	0	0	0	0	2	1	0	0	0	0	0	0	1	0	0	0	0	0	0	0	0	0
OTU_430	Archaea	Euryarchaeota	Thermoplasmata	Marine Group II	uncultured marine group II/III euryarchaeote AD1000_31_C10	uncultured marine group II/III euryarchaeote AD1000_31_C10	uncultured marine group II/III euryarchaeote AD1000_31_C10	0	0	0	0	0	0	0	0	0	1	0	0	0	0	0	3	0	0	0	0	0	0
OTU_433	Archaea	Nanoarchaeaeota	Woesearchaeia	uncultured euryarchaeote	uncultured euryarchaeote	uncultured euryarchaeote	uncultured euryarchaeote	0	0	0	0	0	0	0	0	0	0	0	0	0	4	0	0	0	0	0	0	0	0
OTU_435	Archaea	Thaumarchaeota	Marine Benthic Group A	uncultured marine crenarchaeote AD1000-23-H12	uncultured marine crenarchaeote AD1000-23-H12	uncultured marine crenarchaeote AD1000-23-H12	uncultured marine crenarchaeote AD1000-23-H12	0	0	0	0	0	0	0	0	0	0	1	2	0	1	0	0	0	0	0	0	0	0
OTU_451	Archaea	Euryarchaeota	Thermoplasmata	Marine Group II	uncultured marine group II/III euryarchaeote AD1000_108_D01	uncultured marine group II/III euryarchaeote AD1000_108_D01	uncultured marine group II/III euryarchaeote AD1000_108_D01	1	0	0	0	0	0	0	0	0	2	0	0	0	0	0	0	0	0	0	1	0	0
OTU_481	Archaea	Nanoarchaeaeota	Woesearchaeia	unidentified archaeon	unidentified archaeon	unidentified archaeon	unidentified archaeon	0	0	0	0	4	0	0	0	0	0	0	0	0	0	0	0	0	0	0	0	0	0
OTU_549	Archaea	Euryarchaeota	Thermoplasmata	Marine Group II	uncultured marine group II/III euryarchaeote AD1000_31_C10	uncultured marine group II/III euryarchaeote AD1000_31_C10	uncultured marine group II/III euryarchaeote AD1000_31_C10	0	0	0	1	0	0	0	0	0	0	0	0	0	0	0	0	0	0	0	0	1	2
OTU_554	Archaea	Thaumarchaeota	Nitrososphaeria	Nitrosopumilales	Nitrosopumilaceae	uncultured thaumarchaeote	uncultured thaumarchaeote	0	1	0	0	0	0	0	0	0	0	0	0	0	0	0	1	0	0	0	2	0	0
OTU_555	Archaea	Euryarchaeota	Thermoplasmata	Marine Group II	uncultured marine group II/III euryarchaeote AD1000_108_D01	uncultured marine group II/III euryarchaeote AD1000_108_D01	uncultured marine group II/III euryarchaeote AD1000_108_D01	1	1	0	0	0	0	0	0	0	2	0	0	0	0	0	0	0	0	0	0	0	0
OTU_556	Archaea	Euryarchaeota	Thermoplasmata	Marine Group II	uncultured marine group II euryarchaeote	uncultured marine group II euryarchaeote	uncultured marine group II euryarchaeote	0	0	0	1	0	1	0	0	0	0	0	0	0	2	0	0	0	0	0	0	0	0
OTU_623	Archaea	Euryarchaeota	Thermoplasmata	Marine Group II	Unclassified	Unclassified	Unclassified	0	0	0	0	0	0	0	0	0	1	0	0	0	3	0	0	0	0	0	0	0	0
OTU_633	Archaea	Euryarchaeota	Methanomicrobia	Methanosarcinales	Methanosaetaceae	Methanosaeta	uncultured euryarchaeote	0	0	0	0	0	0	0	0	0	0	0	0	0	0	0	0	0	0	4	0	0	0
OTU_668	Archaea	Thaumarchaeota	Nitrososphaeria	Nitrosopumilales	Nitrosopumilaceae	Candidatus Nitrosopelagicus	marine metagenome	0	0	0	0	0	0	2	0	2	0	0	0	0	0	0	0	0	0	0	0	0	0
OTU_673	Archaea	Thaumarchaeota	Nitrososphaeria	Nitrosopumilales	Nitrosopumilaceae	Unclassified	Unclassified	0	0	0	1	0	0	0	0	0	0	0	0	0	0	0	0	0	3	0	0	0	0
OTU_688	Archaea	Euryarchaeota	Thermoplasmata	Marine Group II	Marine group II euryarchaeote REDSEA-S03_B6	Marine group II euryarchaeote REDSEA-S03_B6	Marine group II euryarchaeote REDSEA-S03_B6	0	0	0	0	0	0	0	0	0	0	1	2	0	1	0	0	0	0	0	0	0	0
OTU_694	Archaea	Thaumarchaeota	Nitrososphaeria	Nitrosopumilales	Nitrosopumilaceae	Unclassified	Unclassified	0	0	0	0	1	2	0	0	0	0	0	0	0	0	1	0	0	0	0	0	0	0
OTU_703	Archaea	Euryarchaeota	Thermoplasmata	Marine Group III	uncultured marine archaeon	uncultured marine archaeon	uncultured marine archaeon	0	1	1	0	0	0	0	1	0	0	0	0	1	0	0	0	0	0	0	0	0	0
OTU_759	Archaea	Thaumarchaeota	Nitrososphaeria	Nitrosopumilales	Nitrosopumilaceae	uncultured marine archaeon	uncultured marine archaeon	1	0	0	0	0	1	0	0	0	2	0	0	0	0	0	0	0	0	0	0	0	0
OTU_762	Archaea	Nanoarchaeaeota	Woesearchaeia	Unclassified	Unclassified	Unclassified	Unclassified	0	1	0	0	3	0	0	0	0	0	0	0	0	0	0	0	0	0	0	0	0	0
OTU_881	Archaea	Nanoarchaeaeota	Woesearchaeia	uncultured euryarchaeote	uncultured euryarchaeote	uncultured euryarchaeote	uncultured euryarchaeote	0	0	0	0	0	0	0	0	0	0	3	1	0	0	0	0	0	0	0	0	0	0
OTU_885	Archaea	Euryarchaeota	Thermoplasmata	Marine Group II	Unclassified	Unclassified	Unclassified	1	0	0	0	0	0	0	0	3	0	0	0	0	0	0	0	0	0	0	0	0	0
OTU_899	Archaea	Nanoarchaeaeota	Woesearchaeia	uncultured bacterium	uncultured bacterium	uncultured bacterium	uncultured bacterium	0	0	0	0	0	0	0	2	0	0	0	1	0	0	0	0	0	0	0	0	1	0
OTU_919	Archaea	Thaumarchaeota	Nitrososphaeria	Nitrosopumilales	Nitrosopumilaceae	uncultured thaumarchaeote	uncultured thaumarchaeote	0	2	0	0	0	0	0	0	0	0	0	0	1	0	0	0	1	0	0	0	0	0
OTU_942	Archaea	Thaumarchaeota	Nitrososphaeria	Nitrosopumilales	Nitrosopumilaceae	marine metagenome	marine metagenome	0	0	0	0	0	0	0	1	0	0	0	0	0	0	2	0	0	1	0	0	0	0
OTU_947	Archaea	Thaumarchaeota	Nitrososphaeria	Nitrosopumilales	Nitrosopumilaceae	Unclassified	Unclassified	0	0	0	0	2	2	0	0	0	0	0	0	0	0	0	0	0	0	0	0	0	0
OTU_985	Archaea	Euryarchaeota	Thermoplasmata	Marine Group II	uncultured marine group II/III euryarchaeote AD1000_31_C10	uncultured marine group II/III euryarchaeote AD1000_31_C10	uncultured marine group II/III euryarchaeote AD1000_31_C10	0	0	0	0	0	0	0	0	0	0	0	0	0	0	0	0	0	4	0	0	0	0
OTU_1054	Archaea	Thaumarchaeota	Nitrososphaeria	Nitrosopumilales	Nitrosopumilaceae	Unclassified	Unclassified	0	0	0	0	0	0	0	0	0	0	0	0	0	0	2	0	2	0	0	1	0	0
OTU_1072	Archaea	Euryarchaeota	Thermoplasmata	Marine Group II	uncultured marine group II/III euryarchaeote AD1000_108_D01	uncultured marine group II/III euryarchaeote AD1000_108_D01	uncultured marine group II/III euryarchaeote AD1000_108_D01	0	2	0	0	1	0	0	0	0	0	0	0	0	0	0	2	0	0	0	0	0	0
OTU_1133	Archaea	Euryarchaeota	Thermoplasmata	Marine Group II	uncultured marine group II/III euryarchaeote AD1000_31_C10	uncultured marine group II/III euryarchaeote AD1000_31_C10	uncultured marine group II/III euryarchaeote AD1000_31_C10	0	1	0	0	0	0	0	0	0	1	0	0	0	0	0	0	1	2	0	0	0	0
OTU_166	Archaea	Euryarchaeota	Thermoplasmata	Marine Group II	uncultured marine group II euryarchaeote HF130_28F07	uncultured marine group II euryarchaeote HF130_28F07	uncultured marine group II euryarchaeote HF130_28F07	0	0	0	0	0	0	0	0	5	0	0	0	0	0	0	0	0	0	0	0	0	0
OTU_177	Archaea	Euryarchaeota	Thermoplasmata	Marine Group II	Unclassified	Unclassified	Unclassified	2	0	0	0	0	0	1	0	2	0	0	0	0	0	0	0	0	0	0	0	0	0
OTU_182	Archaea	Thaumarchaeota	Nitrososphaeria	Nitrosopumilales	Nitrosopumilaceae	Unclassified	Unclassified	0	0	2	0	0	0	0	0	0	2	0	0	0	0	0	0	0	0	0	1	0	0
OTU_183	Archaea	Thaumarchaeota	Nitrososphaeria	Nitrosopumilales	Nitrosopumilaceae	uncultured thaumarchaeote	uncultured thaumarchaeote	0	1	0	0	0	0	0	0	1	2	0	0	0	0	0	0	0	0	0	0	0	1
OTU_300	Archaea	Nanoarchaeaeota	Woesearchaeia	uncultured archaeon	uncultured archaeon	uncultured archaeon	uncultured archaeon	0	0	0	0	0	0	0	0	0	0	0	0	5	0	0	0	0	0	0	0	0	0
OTU_386	Archaea	Euryarchaeota	Thermoplasmata	Marine Group II	Marine group II euryarchaeote REDSEA-S19_B7N8	Marine group II euryarchaeote REDSEA-S19_B7N8	Marine group II euryarchaeote REDSEA-S19_B7N8	1	0	0	0	0	0	0	0	4	0	0	0	0	0	0	0	0	0	0	0	0	0
OTU_405	Archaea	Nanoarchaeaeota	Woesearchaeia	uncultured euryarchaeote	uncultured euryarchaeote	uncultured euryarchaeote	uncultured euryarchaeote	0	0	0	0	0	0	0	0	0	0	0	1	1	3	0	0	0	0	0	0	0	0
OTU_422	Archaea	Euryarchaeota	Thermoplasmata	Marine Group II	Unclassified	Unclassified	Unclassified	0	0	0	0	0	0	0	1	0	0	4	0	0	0	0	0	0	0	0	0	0	0
OTU_439	Archaea	Thaumarchaeota	Nitrososphaeria	Nitrosopumilales	Nitrosopumilaceae	uncultured marine archaeon	uncultured marine archaeon	0	0	0	0	0	0	0	0	0	0	4	1	0	0	0	0	0	0	0	0	0	0
OTU_466	Archaea	Euryarchaeota	Thermoplasmata	Marine Group II	uncultured marine group II/III euryarchaeote AD1000_31_C10	uncultured marine group II/III euryarchaeote AD1000_31_C10	uncultured marine group II/III euryarchaeote AD1000_31_C10	0	1	0	0	0	0	0	0	0	1	0	0	0	0	0	2	0	0	0	0	1	0
OTU_480	Archaea	Thaumarchaeota	Nitrososphaeria	Nitrosopumilales	Nitrosopumilaceae	Candidatus Nitrosopumilus	Unclassified	0	0	0	0	0	1	0	0	0	0	0	0	0	0	0	1	1	0	0	2	0	0
OTU_502	Archaea	Thaumarchaeota	Nitrososphaeria	Nitrosopumilales	Nitrosopumilaceae	Unclassified	Unclassified	0	1	0	1	0	0	0	0	0	0	0	0	0	0	0	1	2	0	0	0	0	0
OTU_503	Archaea	Euryarchaeota	Thermoplasmata	Marine Group II	Marine group II euryarchaeote REDSEA-S03_B6	Marine group II euryarchaeote REDSEA-S03_B6	Marine group II euryarchaeote REDSEA-S03_B6	0	3	0	0	0	0	0	0	0	0	0	0	0	0	0	0	2	0	0	0	0	0
OTU_514	Archaea	Thaumarchaeota	Nitrososphaeria	Nitrosopumilales	Nitrosopumilaceae	Unclassified	Unclassified	0	0	1	0	1	0	0	1	0	1	0	0	0	0	0	0	0	0	0	1	0	0
OTU_578	Archaea	Thaumarchaeota	Nitrososphaeria	Nitrosopumilales	Nitrosopumilaceae	uncultured thaumarchaeote	uncultured thaumarchaeote	0	2	0	0	0	0	0	0	0	1	0	0	0	0	0	1	1	0	0	0	0	0
OTU_610	Archaea	Thaumarchaeota	Nitrososphaeria	Nitrosopumilales	Nitrosopumilaceae	uncultured thaumarchaeote	uncultured thaumarchaeote	0	0	0	0	0	0	0	1	0	0	1	0	0	0	0	2	0	0	0	0	1	0
OTU_611	Archaea	Thaumarchaeota	Nitrososphaeria	Nitrosopumilales	Nitrosopumilaceae	uncultured marine archaeon	uncultured marine archaeon	0	0	0	0	0	0	0	0	0	0	0	0	0	0	0	1	2	0	0	2	0	0
OTU_636	Archaea	Euryarchaeota	Thermoplasmata	Marine Group II	uncultured marine archaeon	uncultured marine archaeon	uncultured marine archaeon	0	0	0	0	0	0	0	5	0	0	0	0	0	0	0	0	0	0	0	0	0	0
OTU_664	Archaea	Thaumarchaeota	Nitrososphaeria	Nitrosopumilales	Nitrosopumilaceae	Unclassified	Unclassified	0	0	0	0	0	0	0	0	0	1	0	0	0	0	0	1	0	0	0	3	0	0
OTU_679	Archaea	Thaumarchaeota	Nitrososphaeria	Nitrosopumilales	Nitrosopumilaceae	uncultured thaumarchaeote	uncultured thaumarchaeote	0	0	0	0	0	0	0	0	0	0	0	0	0	0	0	2	0	0	0	3	0	0
OTU_705	Archaea	Thaumarchaeota	Nitrososphaeria	Nitrosopumilales	Nitrosopumilaceae	Unclassified	Unclassified	0	0	0	0	0	1	0	0	0	0	0	1	1	2	0	0	0	0	0	0	0	0
OTU_728	Archaea	Euryarchaeota	Thermoplasmata	Marine Group II	Unclassified	Unclassified	Unclassified	0	0	0	0	0	0	0	0	2	1	0	0	0	0	0	0	0	0	2	0	0	0
OTU_751	Archaea	Euryarchaeota	Thermoplasmata	Marine Group II	uncultured marine group II/III euryarchaeote AD1000_31_C10	uncultured marine group II/III euryarchaeote AD1000_31_C10	uncultured marine group II/III euryarchaeote AD1000_31_C10	0	0	0	0	0	0	0	0	0	0	0	0	0	0	0	0	0	5	0	0	0	0
OTU_768	Archaea	Thaumarchaeota	Marine Benthic Group A	uncultured marine crenarchaeote KM3-153-F8	uncultured marine crenarchaeote KM3-153-F8	uncultured marine crenarchaeote KM3-153-F8	uncultured marine crenarchaeote KM3-153-F8	0	0	0	0	0	0	0	0	0	0	2	0	1	2	0	0	0	0	0	0	0	0
OTU_790	Archaea	Thaumarchaeota	Nitrososphaeria	Nitrosopumilales	Nitrosopumilaceae	uncultured thaumarchaeote	uncultured thaumarchaeote	0	0	0	0	0	0	0	0	0	0	4	0	0	0	0	1	0	0	0	0	0	0
OTU_833	Archaea	Thaumarchaeota	Nitrososphaeria	Nitrosopumilales	Nitrosopumilaceae	uncultured marine archaeon	uncultured marine archaeon	0	0	0	0	0	0	0	0	0	0	0	0	0	0	2	0	1	0	0	2	0	0
OTU_838	Archaea	Euryarchaeota	Thermoplasmata	Marine Group III	uncultured marine archaeon	uncultured marine archaeon	uncultured marine archaeon	0	0	0	0	0	0	0	3	0	0	1	0	1	0	0	0	0	0	0	0	0	0
OTU_936	Archaea	Thaumarchaeota	Nitrososphaeria	Nitrosopumilales	Nitrosopumilaceae	Candidatus Nitrosopelagicus	marine metagenome	0	0	0	0	0	0	0	0	0	0	0	0	0	0	0	0	1	0	4	0	0	0
OTU_956	Archaea	Thaumarchaeota	Group 1.1c	uncultured marine group I thaumarchaeote	uncultured marine group I thaumarchaeote	uncultured marine group I thaumarchaeote	uncultured marine group I thaumarchaeote	0	0	0	0	0	0	0	0	0	0	2	1	1	1	0	0	0	0	0	0	0	0
OTU_964	Archaea	Thaumarchaeota	Nitrososphaeria	Nitrosopumilales	Nitrosopumilaceae	uncultured marine crenarchaeote SAT1000-23-F7	uncultured marine crenarchaeote SAT1000-23-F7	0	0	0	0	2	0	0	1	0	1	0	0	0	1	0	0	0	0	0	0	0	0
OTU_971	Archaea	Thaumarchaeota	Nitrososphaeria	Nitrosopumilales	Nitrosopumilaceae	Candidatus Nitrosopelagicus	uncultured archaeon	0	1	0	0	0	0	0	0	0	0	0	0	0	0	0	3	0	0	0	1	0	0
OTU_984	Archaea	Thaumarchaeota	Nitrososphaeria	Nitrosopumilales	Nitrosopumilaceae	uncultured marine archaeon	uncultured marine archaeon	0	0	0	0	0	1	0	0	0	0	0	0	0	0	2	0	1	1	0	0	0	0
OTU_1035	Archaea	Thaumarchaeota	Nitrososphaeria	Nitrosopumilales	Nitrosopumilaceae	uncultured marine archaeon	uncultured marine archaeon	0	0	0	1	0	0	0	0	0	0	0	0	1	0	0	0	2	0	0	2	0	0
OTU_1064	Archaea	Euryarchaeota	Thermoplasmata	Marine Group II	Unclassified	Unclassified	Unclassified	4	0	0	0	0	0	0	0	2	0	0	0	0	0	0	0	0	0	0	0	0	0
OTU_1129	Archaea	Thaumarchaeota	Nitrososphaeria	Nitrosopumilales	Nitrosopumilaceae	marine metagenome	marine metagenome	0	0	0	1	0	2	0	1	0	0	0	0	0	2	0	0	0	0	0	0	0	0
OTU_163	Archaea	Unclassified	Unclassified	Unclassified	Unclassified	Unclassified	Unclassified	0	0	0	0	0	0	0	0	0	0	0	0	0	0	0	0	0	0	0	0	0	6
OTU_185	Archaea	Thaumarchaeota	Nitrososphaeria	Nitrosopumilales	Nitrosopumilaceae	Unclassified	Unclassified	0	0	0	0	0	0	0	0	0	0	4	2	0	0	0	0	0	0	0	0	0	0
OTU_193	Archaea	Thaumarchaeota	Marine Benthic Group A	uncultured marine crenarchaeote AD1000-325-A12	uncultured marine crenarchaeote AD1000-325-A12	uncultured marine crenarchaeote AD1000-325-A12	uncultured marine crenarchaeote AD1000-325-A12	0	0	0	0	0	0	0	0	0	0	0	0	0	0	0	3	0	0	0	3	0	0
OTU_194	Archaea	Thaumarchaeota	Marine Benthic Group A	uncultured crenarchaeote	uncultured crenarchaeote	uncultured crenarchaeote	uncultured crenarchaeote	0	0	0	0	0	0	0	0	0	0	1	0	1	1	0	0	0	0	0	0	3	0
OTU_210	Archaea	Euryarchaeota	Thermoplasmata	Marine Group II	Unclassified	Unclassified	Unclassified	2	0	0	0	0	0	3	0	1	0	0	0	0	0	0	0	0	0	0	0	0	0
OTU_240	Archaea	Thaumarchaeota	Nitrososphaeria	Nitrosopumilales	Nitrosopumilaceae	marine metagenome	marine metagenome	0	0	0	0	0	0	0	0	0	0	0	0	0	1	2	0	1	1	0	0	1	0
OTU_297	Archaea	Nanoarchaeaeota	Woesearchaeia	marine metagenome	marine metagenome	marine metagenome	marine metagenome	0	0	0	0	0	0	0	0	0	0	1	4	0	1	0	0	0	0	0	0	0	0
OTU_311	Archaea	Thaumarchaeota	Nitrososphaeria	Nitrosopumilales	Nitrosopumilaceae	Candidatus Nitrosopumilus	uncultured archaeon	0	1	0	0	0	0	0	0	3	0	0	0	0	1	0	0	0	0	0	0	1	0
OTU_346	Archaea	Thaumarchaeota	Nitrososphaeria	Nitrosopumilales	Nitrosopumilaceae	uncultured marine crenarchaeote SAT1000-23-F7	uncultured marine crenarchaeote SAT1000-23-F7	0	1	1	0	0	0	0	0	0	0	0	0	0	0	0	2	1	0	0	1	0	0
OTU_353	Archaea	Nanoarchaeaeota	Woesearchaeia	uncultured archaeon	uncultured archaeon	uncultured archaeon	uncultured archaeon	0	0	0	0	0	0	0	0	0	0	0	0	0	6	0	0	0	0	0	0	0	0
OTU_377	Archaea	Euryarchaeota	Methanobacteria	Methanobacteriales	Methanobacteriaceae	Methanobrevibacter	Unclassified	0	0	0	0	0	0	0	0	0	0	0	0	6	0	0	0	0	0	0	0	0	0
OTU_395	Archaea	Nanoarchaeaeota	Woesearchaeia	uncultured archaeon	uncultured archaeon	uncultured archaeon	uncultured archaeon	0	0	0	2	0	1	0	0	0	0	0	0	1	1	0	0	0	0	0	0	0	1
OTU_419	Archaea	Euryarchaeota	Thermoplasmata	Marine Group II	Marine group II euryarchaeote REDSEA-S03_B6	Marine group II euryarchaeote REDSEA-S03_B6	Marine group II euryarchaeote REDSEA-S03_B6	0	0	0	0	0	0	1	0	5	0	0	0	0	0	0	0	0	0	0	0	0	0
OTU_425	Archaea	Thaumarchaeota	Group 1.1c	uncultured marine group I thaumarchaeote	uncultured marine group I thaumarchaeote	uncultured marine group I thaumarchaeote	uncultured marine group I thaumarchaeote	0	0	0	0	0	4	0	0	0	0	0	1	0	1	0	0	0	0	0	0	0	0
OTU_482	Archaea	Nanoarchaeaeota	Woesearchaeia	uncultured archaeon	uncultured archaeon	uncultured archaeon	uncultured archaeon	0	0	0	6	0	0	0	0	0	0	0	0	0	0	0	0	0	0	0	0	0	0
OTU_487	Archaea	Thaumarchaeota	Nitrososphaeria	Nitrosopumilales	Nitrosopumilaceae	Candidatus Nitrosopumilus	Unclassified	0	0	0	0	0	5	0	0	0	0	0	0	1	0	0	0	0	0	0	0	0	0
OTU_505	Archaea	Thaumarchaeota	Nitrososphaeria	Nitrosopumilales	Nitrosopumilaceae	Candidatus Nitrosopelagicus	uncultured archaeon	0	1	0	0	0	0	1	0	0	0	0	0	0	0	1	2	0	0	0	1	0	0
OTU_616	Archaea	Euryarchaeota	Thermoplasmata	Marine Group II	uncultured marine group II euryarchaeote HF130_40G09	uncultured marine group II euryarchaeote HF130_40G09	uncultured marine group II euryarchaeote HF130_40G09	0	4	0	0	0	0	0	0	1	1	0	0	0	0	0	0	0	0	0	0	0	0
OTU_713	Archaea	Thaumarchaeota	Nitrososphaeria	Nitrosopumilales	Nitrosopumilaceae	Unclassified	Unclassified	0	0	0	1	0	1	0	0	0	0	0	0	0	0	1	0	2	1	0	0	0	0
OTU_922	Archaea	Thaumarchaeota	Nitrososphaeria	Nitrosopumilales	Nitrosopumilaceae	uncultured marine archaeon	uncultured marine archaeon	0	0	1	0	0	1	0	0	0	0	1	0	1	0	2	0	0	0	0	0	0	0
OTU_954	Archaea	Thaumarchaeota	Nitrososphaeria	Nitrosopumilales	Nitrosopumilaceae	uncultured marine archaeon	uncultured marine archaeon	0	0	0	0	0	1	0	0	1	0	0	1	0	0	0	0	1	1	0	0	0	1
OTU_970	Archaea	Nanoarchaeaeota	Woesearchaeia	uncultured archaeon	uncultured archaeon	uncultured archaeon	uncultured archaeon	0	0	0	1	5	0	0	0	0	0	0	0	0	0	0	0	0	0	0	0	0	0
OTU_992	Archaea	Thaumarchaeota	Nitrososphaeria	Nitrosopumilales	Nitrosopumilaceae	Candidatus Nitrosopumilus	uncultured marine group I thaumarchaeote	0	0	1	0	0	0	0	0	0	0	0	0	0	0	0	3	0	0	0	2	0	0
OTU_1006	Archaea	Thaumarchaeota	Nitrososphaeria	Nitrosopumilales	Nitrosopumilaceae	uncultured archaeon	uncultured archaeon	0	0	0	0	0	0	0	0	0	0	2	2	0	0	0	0	1	0	0	2	0	0
OTU_1117	Archaea	Thaumarchaeota	Nitrososphaeria	Nitrosopumilales	Nitrosopumilaceae	Unclassified	Unclassified	0	0	0	0	0	0	0	0	0	1	0	0	0	0	0	6	0	0	0	0	0	0
OTU_167	Archaea	Euryarchaeota	Thermoplasmata	Marine Group III	uncultured marine archaeon	uncultured marine archaeon	uncultured marine archaeon	0	0	0	0	0	0	0	0	0	7	0	0	0	0	0	0	0	0	0	0	0	0
OTU_206	Archaea	Euryarchaeota	Thermoplasmata	Marine Group II	Unclassified	Unclassified	Unclassified	4	0	0	0	0	0	0	0	3	0	0	0	0	0	0	0	0	0	0	0	0	0
OTU_226	Archaea	Thaumarchaeota	Nitrososphaeria	Nitrosopumilales	Nitrosopumilaceae	Unclassified	Unclassified	0	0	0	0	3	0	0	0	0	1	0	0	0	0	0	0	0	2	0	0	0	1
OTU_264	Archaea	Euryarchaeota	Thermoplasmata	Marine Group II	Unclassified	Unclassified	Unclassified	1	0	0	0	0	0	3	0	2	1	0	0	0	0	0	0	0	0	0	0	0	0
OTU_334	Archaea	Euryarchaeota	Methanomicrobia	Methanosarcinales	Methanosarcinaceae	Methanosarcina	Unclassified	0	0	0	0	0	0	0	0	0	0	0	0	0	0	6	0	0	0	0	1	0	0
OTU_342	Archaea	Euryarchaeota	Thermoplasmata	Marine Group II	Marine group II euryarchaeote REDSEA-S19_B7N8	Marine group II euryarchaeote REDSEA-S19_B7N8	Marine group II euryarchaeote REDSEA-S19_B7N8	5	0	0	0	0	0	0	0	2	0	0	0	0	0	0	0	0	0	0	0	0	0
OTU_517	Archaea	Euryarchaeota	Thermoplasmata	Marine Group II	uncultured marine group II euryarchaeote	uncultured marine group II euryarchaeote	uncultured marine group II euryarchaeote	0	0	0	0	1	5	0	0	0	0	0	0	0	1	0	0	0	0	0	0	0	0
OTU_532	Archaea	Euryarchaeota	Thermoplasmata	Marine Group II	uncultured marine group II/III euryarchaeote AD1000_108_D01	uncultured marine group II/III euryarchaeote AD1000_108_D01	uncultured marine group II/III euryarchaeote AD1000_108_D01	0	2	0	0	0	0	0	0	0	5	0	0	0	0	0	0	0	0	0	0	0	0
OTU_586	Archaea	Thaumarchaeota	Nitrososphaeria	Nitrosopumilales	Nitrosopumilaceae	Unclassified	Unclassified	0	0	0	2	3	1	0	0	0	0	0	0	0	1	0	0	0	0	0	0	0	0
OTU_677	Archaea	Euryarchaeota	Thermoplasmata	Marine Group II	Marine group II euryarchaeote REDSEA-S19_B7N8	Marine group II euryarchaeote REDSEA-S19_B7N8	Marine group II euryarchaeote REDSEA-S19_B7N8	3	0	0	0	0	0	1	0	2	1	0	0	0	0	0	0	0	0	0	0	0	0
OTU_866	Archaea	Euryarchaeota	Thermoplasmata	Marine Group II	Unclassified	Unclassified	Unclassified	0	1	1	0	0	0	2	0	0	2	0	0	0	0	0	0	0	1	0	0	0	0
OTU_1024	Archaea	Thaumarchaeota	Nitrososphaeria	Nitrosopumilales	Nitrosopumilaceae	Candidatus Nitrosopelagicus	uncultured archaeon	0	0	0	0	0	0	0	0	0	2	0	0	0	0	0	4	1	0	0	1	0	0
OTU_1126	Archaea	Euryarchaeota	Thermoplasmata	Marine Group II	Marine group II euryarchaeote REDSEA-S19_B7N8	Marine group II euryarchaeote REDSEA-S19_B7N8	Marine group II euryarchaeote REDSEA-S19_B7N8	3	0	0	0	0	0	1	0	4	0	0	0	0	0	0	0	0	0	0	0	0	0
OTU_145	Archaea	Nanoarchaeaeota	Woesearchaeia	uncultured euryarchaeote	uncultured euryarchaeote	uncultured euryarchaeote	uncultured euryarchaeote	0	0	0	0	0	0	0	0	0	0	0	0	1	7	0	0	0	0	0	0	0	0
OTU_184	Archaea	Euryarchaeota	Thermoplasmata	Marine Group II	Unclassified	Unclassified	Unclassified	0	0	0	0	0	0	0	0	2	6	0	0	0	0	0	0	0	0	0	0	0	0
OTU_258	Archaea	Thaumarchaeota	Nitrososphaeria	Nitrosopumilales	Nitrosopumilaceae	Unclassified	Unclassified	0	0	0	0	0	0	0	0	0	0	1	2	2	3	0	0	0	0	0	0	0	0
OTU_260	Archaea	Thaumarchaeota	Nitrososphaeria	Nitrosopumilales	Nitrosopumilaceae	uncultured marine archaeon	uncultured marine archaeon	0	0	0	0	1	3	0	1	0	0	0	0	0	0	0	0	1	1	0	0	0	1
OTU_355	Archaea	Thaumarchaeota	Marine Benthic Group A	uncultured marine archaeon	uncultured marine archaeon	uncultured marine archaeon	uncultured marine archaeon	0	1	0	0	0	0	0	0	0	1	0	0	0	0	0	5	1	0	0	0	0	0
OTU_375	Archaea	Euryarchaeota	Thermoplasmata	Marine Group II	uncultured marine group II euryarchaeote	uncultured marine group II euryarchaeote	uncultured marine group II euryarchaeote	0	0	0	0	0	0	0	0	0	0	6	2	0	0	0	0	0	0	0	0	0	0
OTU_397	Archaea	Crenarchaeota	Crenarchaeota Incertae Sedis	Aigarchaeales	Geothermarchaeaceae	uncultured marine archaeon	uncultured marine archaeon	0	0	2	0	0	0	0	0	0	0	6	0	0	0	0	0	0	0	0	0	0	0
OTU_479	Archaea	Euryarchaeota	Thermoplasmata	Marine Group II	Unclassified	Unclassified	Unclassified	0	1	2	0	0	0	0	0	0	0	1	0	1	0	0	0	0	2	0	0	1	0
OTU_522	Archaea	Euryarchaeota	Thermoplasmata	Marine Group II	uncultured marine group II euryarchaeote	uncultured marine group II euryarchaeote	uncultured marine group II euryarchaeote	0	0	0	0	0	0	0	8	0	0	0	0	0	0	0	0	0	0	0	0	0	0
OTU_531	Archaea	Thaumarchaeota	Nitrososphaeria	Nitrosopumilales	Nitrosopumilaceae	uncultured marine archaeon	uncultured marine archaeon	0	0	1	0	0	0	0	0	0	4	0	0	1	0	0	1	0	0	0	1	0	0
OTU_544	Archaea	Thaumarchaeota	Nitrososphaeria	Nitrosopumilales	Nitrosopumilaceae	uncultured marine archaeon	uncultured marine archaeon	0	0	1	1	4	0	0	0	0	0	1	0	1	0	0	0	0	0	0	0	0	0
OTU_644	Archaea	Nanoarchaeaeota	Woesearchaeia	marine metagenome	marine metagenome	marine metagenome	marine metagenome	0	0	0	1	0	1	0	0	0	0	0	0	0	1	0	0	0	0	0	5	0	0
OTU_671	Archaea	Euryarchaeota	Halobacteria	Halobacteriales	Halomicrobiaceae	uncultured	marine metagenome	0	0	0	0	2	0	0	0	0	0	2	1	1	1	0	0	0	0	0	1	0	0
OTU_716	Archaea	Thaumarchaeota	Nitrososphaeria	Nitrosopumilales	Nitrosopumilaceae	uncultured marine archaeon	uncultured marine archaeon	0	0	3	1	0	0	0	0	0	0	0	0	0	1	1	0	1	1	0	0	0	0
OTU_825	Archaea	Thaumarchaeota	Nitrososphaeria	Nitrosopumilales	Nitrosopumilaceae	uncultured thaumarchaeote	uncultured thaumarchaeote	0	0	0	0	0	0	0	0	0	1	0	0	0	0	0	1	1	0	0	5	0	0
OTU_884	Archaea	Thaumarchaeota	Nitrososphaeria	Nitrosopumilales	Nitrosopumilaceae	marine metagenome	marine metagenome	0	0	0	0	1	2	0	0	0	0	0	0	0	0	2	0	1	0	0	0	0	2
OTU_1019	Archaea	Euryarchaeota	Thermoplasmata	Marine Group II	uncultured marine group II/III euryarchaeote AD1000_31_C10	uncultured marine group II/III euryarchaeote AD1000_31_C10	uncultured marine group II/III euryarchaeote AD1000_31_C10	0	0	4	0	0	0	0	0	0	0	0	0	0	0	0	0	0	2	0	0	2	1
OTU_1030	Archaea	Thaumarchaeota	Nitrososphaeria	Nitrosopumilales	Nitrosopumilaceae	uncultured marine archaeon	uncultured marine archaeon	0	0	0	0	0	0	0	0	0	0	0	9	0	0	0	0	0	0	0	0	0	0
OTU_1078	Archaea	Euryarchaeota	Thermoplasmata	Marine Group II	uncultured marine group II/III euryarchaeote AD1000_108_D01	uncultured marine group II/III euryarchaeote AD1000_108_D01	uncultured marine group II/III euryarchaeote AD1000_108_D01	0	0	0	0	1	0	0	0	0	1	0	0	0	0	0	3	0	0	0	2	0	2
OTU_251	Archaea	Thaumarchaeota	Nitrososphaeria	Nitrosopumilales	Nitrosopumilaceae	marine metagenome	marine metagenome	0	0	0	0	0	1	0	0	0	0	0	0	0	0	1	1	4	0	0	0	0	2
OTU_401	Archaea	Thaumarchaeota	Nitrososphaeria	Nitrosopumilales	Nitrosopumilaceae	uncultured marine archaeon	uncultured marine archaeon	0	0	1	0	2	1	0	0	0	0	0	0	2	0	1	0	0	1	0	0	0	1
OTU_431	Archaea	Thaumarchaeota	Nitrososphaeria	Nitrosopumilales	Nitrosopumilaceae	marine metagenome	marine metagenome	0	0	0	3	1	2	0	0	0	0	1	0	0	0	0	0	1	1	0	0	0	0
OTU_445	Archaea	Euryarchaeota	Thermoplasmata	Marine Group II	Unclassified	Unclassified	Unclassified	0	0	0	0	1	0	0	5	0	0	2	0	1	0	0	0	0	0	0	0	0	0
OTU_596	Archaea	Euryarchaeota	Thermoplasmata	Marine Group III	uncultured marine archaeon	uncultured marine archaeon	uncultured marine archaeon	0	0	0	0	0	0	0	1	0	0	8	0	0	0	0	0	0	0	0	0	0	0
OTU_604	Archaea	Euryarchaeota	Thermoplasmata	Marine Group III	uncultured marine archaeon	uncultured marine archaeon	uncultured marine archaeon	0	0	2	0	0	0	0	4	0	1	1	0	0	0	0	0	0	0	0	0	1	0
OTU_699	Archaea	Thaumarchaeota	Nitrososphaeria	Nitrosopumilales	Nitrosopumilaceae	marine metagenome	marine metagenome	0	0	0	0	0	0	0	0	0	0	3	5	1	0	0	0	0	0	0	0	0	0
OTU_775	Archaea	Euryarchaeota	Thermoplasmata	Marine Group II	Unclassified	Unclassified	Unclassified	0	4	0	0	0	1	0	0	0	4	0	0	0	0	0	0	0	0	0	0	0	0
OTU_780	Archaea	Nanoarchaeaeota	Woesearchaeia	marine metagenome	marine metagenome	marine metagenome	marine metagenome	0	0	0	1	2	1	0	1	0	0	0	0	0	1	0	0	0	0	0	1	2	0
OTU_951	Archaea	Euryarchaeota	Thermoplasmata	Marine Group II	Unclassified	Unclassified	Unclassified	4	0	0	0	0	0	2	0	3	0	0	0	0	0	0	0	0	0	0	0	0	0
OTU_961	Archaea	Thaumarchaeota	Nitrososphaeria	Nitrosopumilales	Nitrosopumilaceae	uncultured marine archaeon	uncultured marine archaeon	0	1	3	0	0	0	0	1	1	0	1	0	0	0	0	0	2	0	0	0	0	0
OTU_965	Archaea	Euryarchaeota	Thermoplasmata	Marine Group II	uncultured marine group II/III euryarchaeote AD1000_31_C10	uncultured marine group II/III euryarchaeote AD1000_31_C10	uncultured marine group II/III euryarchaeote AD1000_31_C10	0	0	1	0	1	3	0	0	0	0	0	0	0	0	0	0	0	1	0	1	0	2
OTU_212	Archaea	Thaumarchaeota	Nitrososphaeria	Nitrosopumilales	Nitrosopumilaceae	Candidatus Nitrosopumilus	Unclassified	0	1	0	0	0	0	0	1	0	1	0	0	0	0	0	1	4	0	0	2	0	0
OTU_283	Archaea	Thaumarchaeota	Nitrososphaeria	Nitrosopumilales	Nitrosopumilaceae	Unclassified	Unclassified	0	0	1	0	2	4	0	1	0	0	0	0	1	1	0	0	0	0	0	0	0	0
OTU_398	Archaea	Thaumarchaeota	Nitrososphaeria	Nitrosopumilales	Nitrosopumilaceae	Unclassified	Unclassified	0	1	0	0	0	0	0	0	0	0	9	0	0	0	0	0	0	0	0	0	0	0
OTU_421	Archaea	Euryarchaeota	Thermoplasmata	Marine Group II	uncultured marine group II/III euryarchaeote AD1000_108_D01	uncultured marine group II/III euryarchaeote AD1000_108_D01	uncultured marine group II/III euryarchaeote AD1000_108_D01	0	2	0	0	1	0	0	0	0	6	0	0	0	0	0	1	0	0	0	0	0	0
OTU_558	Archaea	Thaumarchaeota	Nitrososphaeria	Nitrosopumilales	Nitrosopumilaceae	Candidatus Nitrosopelagicus	uncultured archaeon	0	0	0	0	0	0	0	0	0	1	0	0	0	0	0	2	1	0	0	6	0	0
OTU_674	Archaea	Thaumarchaeota	Marine Benthic Group A	uncultured marine crenarchaeote AD1000-325-A12	uncultured marine crenarchaeote AD1000-325-A12	uncultured marine crenarchaeote AD1000-325-A12	uncultured marine crenarchaeote AD1000-325-A12	0	0	0	0	0	0	0	0	0	0	0	0	0	0	0	3	0	0	0	7	0	0
OTU_687	Archaea	Nanoarchaeaeota	Woesearchaeia	marine metagenome	marine metagenome	marine metagenome	marine metagenome	0	0	0	0	1	0	0	0	0	0	0	8	1	0	0	0	0	0	0	0	0	0
OTU_888	Archaea	Thaumarchaeota	Nitrososphaeria	Nitrosopumilales	Nitrosopumilaceae	uncultured marine archaeon	uncultured marine archaeon	0	0	0	0	0	0	0	0	0	0	0	0	0	0	0	10	0	0	0	0	0	0
OTU_896	Archaea	Thaumarchaeota	Nitrososphaeria	Nitrosopumilales	Nitrosopumilaceae	Candidatus Nitrosopelagicus	uncultured archaeon	0	0	0	0	0	0	0	0	0	2	0	0	0	0	0	1	1	0	0	6	0	0
OTU_242	Archaea	Thaumarchaeota	Nitrososphaeria	Nitrosopumilales	Nitrosopumilaceae	Candidatus Nitrosopumilus	uncultured archaeon	0	0	0	0	2	6	0	0	0	0	0	0	0	3	0	0	0	0	0	0	0	0
OTU_272	Archaea	Euryarchaeota	Thermoplasmata	Marine Group II	Unclassified	Unclassified	Unclassified	0	0	0	0	0	0	0	1	0	0	10	0	0	0	0	0	0	0	0	0	0	0
OTU_513	Archaea	Thaumarchaeota	Nitrososphaeria	Nitrosopumilales	Nitrosopumilaceae	Candidatus Nitrosopelagicus	uncultured archaeon	0	2	0	0	0	0	0	0	0	2	0	0	0	0	0	1	2	0	0	4	0	0
OTU_707	Archaea	Thaumarchaeota	Nitrososphaeria	Nitrosopumilales	Nitrosopumilaceae	uncultured marine archaeon	uncultured marine archaeon	0	1	1	0	0	0	0	0	0	1	3	0	0	0	0	2	1	0	0	1	0	1
OTU_803	Archaea	Thaumarchaeota	Nitrososphaeria	Nitrosopumilales	Nitrosopumilaceae	uncultured archaeon	uncultured archaeon	0	0	0	1	0	0	0	0	0	0	0	0	0	1	0	1	0	0	0	8	0	0
OTU_846	Archaea	Thaumarchaeota	Nitrososphaeria	Nitrosopumilales	Nitrosopumilaceae	marine metagenome	marine metagenome	0	0	0	0	0	0	0	0	0	0	1	5	2	3	0	0	0	0	0	0	0	0
OTU_901	Archaea	Thaumarchaeota	Nitrososphaeria	Nitrosopumilales	Nitrosopumilaceae	uncultured thaumarchaeote	uncultured thaumarchaeote	0	0	1	2	1	1	0	0	0	0	4	2	0	0	0	0	0	0	0	0	0	0
OTU_94	Archaea	Nanoarchaeaeota	Woesearchaeia	Unclassified	Unclassified	Unclassified	Unclassified	0	0	0	0	0	0	5	0	6	0	0	0	0	0	0	0	0	0	0	0	0	0
OTU_1115	Archaea	Thaumarchaeota	Nitrososphaeria	Nitrosopumilales	Nitrosopumilaceae	uncultured marine crenarchaeote SAT1000-23-F7	uncultured marine crenarchaeote SAT1000-23-F7	0	0	2	3	0	1	0	0	0	0	1	0	1	0	0	1	0	0	0	1	1	1
OTU_130	Archaea	Thaumarchaeota	Marine Benthic Group A	uncultured marine crenarchaeote AD1000-325-A12	uncultured marine crenarchaeote AD1000-325-A12	uncultured marine crenarchaeote AD1000-325-A12	uncultured marine crenarchaeote AD1000-325-A12	0	0	0	0	1	0	0	0	0	0	0	0	5	6	0	0	0	0	0	0	0	0
OTU_245	Archaea	Thaumarchaeota	Marine Benthic Group A	uncultured marine crenarchaeote AD1000-325-A12	uncultured marine crenarchaeote AD1000-325-A12	uncultured marine crenarchaeote AD1000-325-A12	uncultured marine crenarchaeote AD1000-325-A12	0	0	0	1	0	1	0	0	0	1	4	3	0	2	0	0	0	0	0	0	0	0
OTU_269	Archaea	Euryarchaeota	Thermoplasmata	Marine Group III	uncultured marine archaeon	uncultured marine archaeon	uncultured marine archaeon	0	0	0	0	0	1	0	6	0	1	3	0	1	0	0	0	0	0	0	0	0	0
OTU_323	Archaea	Thaumarchaeota	Nitrososphaeria	Nitrosopumilales	Nitrosopumilaceae	Candidatus Nitrosopelagicus	uncultured archaeon	0	2	0	0	0	0	0	0	0	0	0	0	0	0	0	8	1	0	0	1	0	0
OTU_327	Archaea	Euryarchaeota	Thermoplasmata	Marine Group II	Unclassified	Unclassified	Unclassified	1	1	0	0	0	0	5	0	5	0	0	0	0	0	0	0	0	0	0	0	0	0
OTU_552	Archaea	Euryarchaeota	Thermoplasmata	Marine Group III	uncultured marine archaeon	uncultured marine archaeon	uncultured marine archaeon	1	5	0	0	0	0	0	4	0	2	0	0	0	0	0	0	0	0	0	0	0	0
OTU_629	Archaea	Euryarchaeota	Thermoplasmata	Marine Group II	uncultured marine group II/III euryarchaeote AD1000_31_C10	uncultured marine group II/III euryarchaeote AD1000_31_C10	uncultured marine group II/III euryarchaeote AD1000_31_C10	0	0	1	0	0	0	0	0	0	0	0	0	0	0	0	0	1	1	0	0	3	6
OTU_640	Archaea	Euryarchaeota	Methanomicrobia	Methanosarcinales	Methanosaetaceae	Methanosaeta	Unclassified	0	0	0	0	0	0	0	0	0	0	0	0	0	0	0	0	0	0	12	0	0	0
OTU_105	Archaea	Euryarchaeota	Thermoplasmata	Marine Group II	uncultured archaeon	uncultured archaeon	uncultured archaeon	0	1	1	0	2	0	0	0	0	0	7	0	1	1	0	0	0	0	0	0	0	0
OTU_111	Archaea	Thaumarchaeota	Marine Benthic Group A	uncultured archaeon	uncultured archaeon	uncultured archaeon	uncultured archaeon	0	0	3	0	0	0	0	0	0	0	10	0	0	0	0	0	0	0	0	0	0	0
OTU_161	Archaea	Nanoarchaeaeota	Woesearchaeia	marine metagenome	marine metagenome	marine metagenome	marine metagenome	0	0	0	9	3	0	0	0	0	0	1	0	0	0	0	0	0	0	0	0	0	0
OTU_173	Archaea	Euryarchaeota	Thermoplasmata	Marine Group II	uncultured marine group II euryarchaeote HF130_28F07	uncultured marine group II euryarchaeote HF130_28F07	uncultured marine group II euryarchaeote HF130_28F07	0	1	0	0	0	1	0	0	9	2	0	0	0	0	0	0	0	0	0	0	0	0
OTU_246	Archaea	Thaumarchaeota	Nitrososphaeria	Nitrosopumilales	Nitrosopumilaceae	Candidatus Nitrosopelagicus	uncultured archaeon	0	2	0	0	0	0	0	0	0	1	0	2	0	0	0	5	1	0	0	2	0	0
OTU_263	Archaea	Thaumarchaeota	Nitrososphaeria	Nitrosopumilales	Nitrosopumilaceae	marine metagenome	marine metagenome	0	0	1	3	3	2	0	1	0	0	0	0	0	0	2	0	0	1	0	0	0	0
OTU_277	Archaea	Thaumarchaeota	Nitrososphaeria	Nitrosopumilales	Nitrosopumilaceae	Candidatus Nitrosopelagicus	marine metagenome	0	0	0	0	0	0	13	0	0	0	0	0	0	0	0	0	0	0	0	0	0	0
OTU_298	Archaea	Thaumarchaeota	Marine Benthic Group A	uncultured crenarchaeote	uncultured crenarchaeote	uncultured crenarchaeote	uncultured crenarchaeote	0	0	0	0	0	0	0	0	0	0	0	12	0	1	0	0	0	0	0	0	0	0
OTU_351	Archaea	Euryarchaeota	Thermoplasmata	Marine Group II	uncultured marine group II euryarchaeote HF130_40G09	uncultured marine group II euryarchaeote HF130_40G09	uncultured marine group II euryarchaeote HF130_40G09	0	0	0	0	0	0	0	0	0	0	3	0	10	0	0	0	0	0	0	0	0	0
OTU_383	Archaea	Thaumarchaeota	Nitrososphaeria	Nitrosopumilales	Nitrosopumilaceae	uncultured thaumarchaeote	uncultured thaumarchaeote	0	0	0	0	0	0	0	3	0	0	5	4	1	0	0	0	0	0	0	0	0	0
OTU_434	Archaea	Thaumarchaeota	Nitrososphaeria	Nitrosopumilales	Nitrosopumilaceae	uncultured thaumarchaeote	uncultured thaumarchaeote	0	0	0	2	1	0	0	0	0	0	0	7	2	1	0	0	0	0	0	0	0	0
OTU_438	Archaea	Thaumarchaeota	Nitrososphaeria	Nitrosopumilales	Nitrosopumilaceae	marine metagenome	marine metagenome	0	0	0	0	0	0	0	0	0	0	0	0	12	1	0	0	0	0	0	0	0	0
OTU_446	Archaea	Euryarchaeota	Thermoplasmata	Marine Group III	uncultured marine archaeon	uncultured marine archaeon	uncultured marine archaeon	0	0	2	0	0	0	0	11	0	0	0	0	0	0	0	0	0	0	0	0	0	0
OTU_476	Archaea	Euryarchaeota	Thermoplasmata	Marine Group III	uncultured marine archaeon	uncultured marine archaeon	uncultured marine archaeon	0	0	0	3	3	2	0	2	0	0	0	0	2	1	0	0	0	0	0	0	0	0
OTU_682	Archaea	Thaumarchaeota	Nitrososphaeria	Nitrosopumilales	Nitrosopumilaceae	Unclassified	Unclassified	0	2	3	1	0	0	0	0	0	0	0	0	0	0	0	2	1	0	0	4	0	0
OTU_721	Archaea	Thaumarchaeota	Nitrososphaeria	Nitrosopumilales	Nitrosopumilaceae	uncultured marine crenarchaeote SAT1000-23-F7	uncultured marine crenarchaeote SAT1000-23-F7	0	0	0	0	1	0	0	0	0	0	4	6	1	1	0	0	0	0	0	0	0	0
OTU_871	Archaea	Euryarchaeota	Thermoplasmata	Marine Group III	uncultured marine archaeon	uncultured marine archaeon	uncultured marine archaeon	0	0	1	0	0	0	0	1	0	0	2	0	0	0	0	0	0	0	0	0	9	0
OTU_1036	Archaea	Euryarchaeota	Thermoplasmata	Marine Group II	uncultured marine group II/III euryarchaeote AD1000_31_C10	uncultured marine group II/III euryarchaeote AD1000_31_C10	uncultured marine group II/III euryarchaeote AD1000_31_C10	0	0	0	1	0	0	0	1	0	0	0	0	0	0	0	0	0	10	0	0	1	1
OTU_123	Archaea	Thaumarchaeota	Group 1.1c	uncultured marine group I thaumarchaeote	uncultured marine group I thaumarchaeote	uncultured marine group I thaumarchaeote	uncultured marine group I thaumarchaeote	0	0	0	0	0	0	0	0	0	0	14	0	0	0	0	0	0	0	0	0	0	0
OTU_247	Archaea	Thaumarchaeota	Marine Benthic Group A	uncultured marine crenarchaeote AD1000-325-A12	uncultured marine crenarchaeote AD1000-325-A12	uncultured marine crenarchaeote AD1000-325-A12	uncultured marine crenarchaeote AD1000-325-A12	0	0	3	2	1	0	0	0	0	0	0	7	1	0	0	0	0	0	0	0	0	0
OTU_359	Archaea	Euryarchaeota	Thermoplasmata	Marine Group II	uncultured marine group II/III euryarchaeote AD1000_31_C10	uncultured marine group II/III euryarchaeote AD1000_31_C10	uncultured marine group II/III euryarchaeote AD1000_31_C10	0	0	1	0	0	1	0	0	0	0	3	3	4	2	0	0	0	0	0	0	0	0
OTU_456	Archaea	Nanoarchaeaeota	Woesearchaeia	uncultured euryarchaeote	uncultured euryarchaeote	uncultured euryarchaeote	uncultured euryarchaeote	0	0	0	1	1	6	0	0	0	0	0	0	2	4	0	0	0	0	0	0	0	0
OTU_719	Archaea	Thaumarchaeota	Nitrososphaeria	Nitrosopumilales	Nitrosopumilaceae	Candidatus Nitrosopumilus	uncultured archaeon	0	0	0	0	2	11	0	0	0	0	0	0	0	1	0	0	0	0	0	0	0	0
OTU_822	Archaea	Thaumarchaeota	Nitrososphaeria	Nitrosopumilales	Nitrosopumilaceae	uncultured archaeon	uncultured archaeon	0	0	0	0	0	0	0	0	0	4	0	0	0	0	0	0	0	0	0	10	0	0
OTU_831	Archaea	Thaumarchaeota	Nitrososphaeria	Nitrosopumilales	Nitrosopumilaceae	Candidatus Nitrosopelagicus	uncultured thaumarchaeote	0	0	0	0	0	0	0	0	0	0	0	0	0	0	0	14	0	0	0	0	0	0
OTU_1042	Archaea	Euryarchaeota	Thermoplasmata	Marine Group II	marine metagenome	marine metagenome	marine metagenome	6	0	0	0	0	0	3	0	1	0	0	4	0	0	0	0	0	0	0	0	1	0
OTU_107	Archaea	Euryarchaeota	Thermoplasmata	Marine Group II	Unclassified	Unclassified	Unclassified	0	2	0	0	0	0	0	11	0	2	0	0	0	0	0	0	0	0	0	0	0	0
OTU_1070	Archaea	Thaumarchaeota	Nitrososphaeria	Nitrosopumilales	Nitrosopumilaceae	Candidatus Nitrosopelagicus	marine metagenome	0	0	0	0	0	0	4	0	8	0	0	0	0	0	0	1	0	0	2	0	0	0
OTU_261	Archaea	Thaumarchaeota	Nitrososphaeria	Nitrosopumilales	Nitrosopumilaceae	marine metagenome	marine metagenome	0	0	0	0	0	0	0	0	0	0	0	7	6	2	0	0	0	0	0	0	0	0
OTU_273	Archaea	Thaumarchaeota	Nitrososphaeria	Nitrosopumilales	Nitrosopumilaceae	Unclassified	Unclassified	0	0	0	0	0	0	0	0	0	0	11	3	1	0	0	0	0	0	0	0	0	0
OTU_730	Archaea	Thaumarchaeota	Nitrososphaeria	Nitrosopumilales	Nitrosopumilaceae	Unclassified	Unclassified	0	0	1	8	1	1	0	0	0	0	0	0	0	0	0	0	0	0	0	0	0	4
OTU_932	Archaea	Thaumarchaeota	Nitrososphaeria	Nitrosopumilales	Nitrosopumilaceae	uncultured marine archaeon	uncultured marine archaeon	0	0	1	0	0	0	0	0	0	1	0	0	0	0	1	6	2	0	0	3	0	1
OTU_1065	Archaea	Euryarchaeota	Thermoplasmata	Marine Group II	Unclassified	Unclassified	Unclassified	0	0	1	0	0	1	0	0	2	1	3	0	1	0	0	0	0	4	0	0	3	0
OTU_112	Archaea	Thaumarchaeota	Nitrososphaeria	uncultured	uncultured archaeon	uncultured archaeon	uncultured archaeon	0	0	4	0	0	0	0	0	0	0	0	12	0	0	0	0	0	0	0	0	0	0
OTU_113	Archaea	Thaumarchaeota	Nitrososphaeria	Nitrosopumilales	Nitrosopumilaceae	uncultured marine archaeon	uncultured marine archaeon	0	0	0	0	0	0	0	0	0	0	0	15	1	0	0	0	0	0	0	0	0	0
OTU_157	Archaea	Euryarchaeota	Thermoplasmata	Marine Group II	Unclassified	Unclassified	Unclassified	0	4	0	0	0	0	1	0	6	5	0	0	0	0	0	0	0	0	0	0	0	0
OTU_201	Archaea	Thaumarchaeota	Nitrososphaeria	Nitrosopumilales	Nitrosopumilaceae	uncultured marine archaeon	uncultured marine archaeon	0	1	5	3	3	0	0	0	0	0	0	0	0	0	1	0	2	0	0	1	0	0
OTU_361	Archaea	Thaumarchaeota	Marine Benthic Group A	uncultured thaumarchaeote	uncultured thaumarchaeote	uncultured thaumarchaeote	uncultured thaumarchaeote	0	0	0	0	0	0	0	0	0	0	16	0	0	0	0	0	0	0	0	0	0	0
OTU_771	Archaea	Thaumarchaeota	Nitrososphaeria	Nitrosopumilales	Nitrosopumilaceae	uncultured archaeon	uncultured archaeon	0	0	2	0	0	0	0	0	0	0	8	2	0	0	0	1	2	0	0	1	0	0
OTU_812	Archaea	Thaumarchaeota	Nitrososphaeria	Nitrosopumilales	Nitrosopumilaceae	uncultured marine archaeon	uncultured marine archaeon	0	1	3	1	0	4	0	2	0	1	0	0	0	0	1	0	1	1	0	1	0	0
OTU_869	Archaea	Euryarchaeota	Thermoplasmata	Marine Group III	uncultured marine group III euryarchaeote	uncultured marine group III euryarchaeote	uncultured marine group III euryarchaeote	0	0	0	0	0	0	0	0	0	0	7	8	1	0	0	0	0	0	0	0	0	0
OTU_150	Archaea	Euryarchaeota	Thermoplasmata	Marine Group II	marine metagenome	marine metagenome	marine metagenome	0	0	0	0	0	0	0	0	0	0	2	12	1	2	0	0	0	0	0	0	0	0
OTU_187	Archaea	Euryarchaeota	Thermoplasmata	Marine Group II	uncultured marine group II/III euryarchaeote AD1000_09_E08	uncultured marine group II/III euryarchaeote AD1000_09_E08	uncultured marine group II/III euryarchaeote AD1000_09_E08	0	0	1	0	2	0	0	1	0	0	8	3	2	0	0	0	0	0	0	0	0	0
OTU_289	Archaea	Euryarchaeota	Thermoplasmata	Marine Group II	Marine group II euryarchaeote REDSEA-S19_B7N8	Marine group II euryarchaeote REDSEA-S19_B7N8	Marine group II euryarchaeote REDSEA-S19_B7N8	5	0	0	0	0	0	7	1	4	0	0	0	0	0	0	0	0	0	0	0	0	0
OTU_428	Archaea	Euryarchaeota	Thermoplasmata	Marine Group III	uncultured marine group III euryarchaeote	uncultured marine group III euryarchaeote	uncultured marine group III euryarchaeote	0	0	0	0	0	0	0	0	0	0	5	4	0	0	0	0	0	0	0	0	8	0
OTU_504	Archaea	Thaumarchaeota	Nitrososphaeria	Nitrosopumilales	Nitrosopumilaceae	Unclassified	Unclassified	0	1	1	0	0	0	0	0	0	2	0	0	0	0	0	1	2	0	0	10	0	0
OTU_515	Archaea	Euryarchaeota	Methanomicrobia	Methanosarcinales	Methanosarcinaceae	Methanosarcina	Unclassified	0	0	0	0	0	0	0	0	0	0	0	0	0	0	13	0	0	0	0	4	0	0
OTU_542	Archaea	Thaumarchaeota	Nitrososphaeria	Nitrosopumilales	Nitrosopumilaceae	uncultured thaumarchaeote	uncultured thaumarchaeote	0	0	0	0	0	0	0	0	0	0	2	15	0	0	0	0	0	0	0	0	0	0
OTU_564	Archaea	Thaumarchaeota	Nitrososphaeria	Nitrosopumilales	Nitrosopumilaceae	uncultured marine archaeon	uncultured marine archaeon	0	0	0	0	0	0	0	0	0	0	0	0	0	0	0	12	3	0	0	2	0	0
OTU_73	Archaea	Euryarchaeota	Thermoplasmata	Marine Group II	uncultured marine group II euryarchaeote	uncultured marine group II euryarchaeote	uncultured marine group II euryarchaeote	0	0	0	0	8	7	0	0	0	0	0	0	1	1	0	0	0	0	0	0	0	0
OTU_923	Archaea	Thaumarchaeota	Nitrososphaeria	Nitrosopumilales	Nitrosopumilaceae	Candidatus Nitrosopelagicus	uncultured archaeon	0	8	0	0	0	0	0	0	0	1	0	0	0	0	0	3	2	0	0	3	0	0
OTU_1138	Archaea	Euryarchaeota	Thermoplasmata	Marine Group II	marine metagenome	marine metagenome	marine metagenome	3	0	0	0	0	0	4	0	11	0	0	0	0	0	0	0	0	0	0	0	0	0
OTU_437	Archaea	Nanoarchaeaeota	Woesearchaeia	Unclassified	Unclassified	Unclassified	Unclassified	0	0	0	0	0	0	0	1	0	0	3	2	12	0	0	0	0	0	0	0	0	0
OTU_778	Archaea	Thaumarchaeota	Nitrososphaeria	Nitrosopumilales	Nitrosopumilaceae	Candidatus Nitrosopumilus	uncultured marine archaeon	0	0	0	1	6	9	0	0	0	0	0	0	0	2	0	0	0	0	0	0	0	0
OTU_804	Archaea	Euryarchaeota	Thermoplasmata	Marine Group III	uncultured archaeon	uncultured archaeon	uncultured archaeon	2	0	0	0	0	0	1	0	1	2	0	0	0	0	0	0	0	0	0	0	12	0
OTU_93	Archaea	Euryarchaeota	Thermoplasmata	Marine Group II	uncultured marine group II euryarchaeote HF130_40G09	uncultured marine group II euryarchaeote HF130_40G09	uncultured marine group II euryarchaeote HF130_40G09	0	0	0	0	0	0	0	0	14	1	0	1	2	0	0	0	0	0	0	0	0	0
OTU_934	Archaea	Thaumarchaeota	Nitrososphaeria	Nitrosopumilales	Nitrosopumilaceae	uncultured marine archaeon	uncultured marine archaeon	0	0	2	2	0	0	0	1	0	0	2	0	0	0	0	0	0	10	0	1	0	0
OTU_974	Archaea	Euryarchaeota	Thermoplasmata	Marine Group II	uncultured marine group II/III euryarchaeote AD1000_31_C10	uncultured marine group II/III euryarchaeote AD1000_31_C10	uncultured marine group II/III euryarchaeote AD1000_31_C10	0	0	0	0	0	0	0	0	0	0	18	0	0	0	0	0	0	0	0	0	0	0
OTU_110	Archaea	Thaumarchaeota	Marine Benthic Group A	uncultured marine crenarchaeote AD1000-23-H12	uncultured marine crenarchaeote AD1000-23-H12	uncultured marine crenarchaeote AD1000-23-H12	uncultured marine crenarchaeote AD1000-23-H12	0	5	4	0	0	0	0	0	0	2	4	0	0	4	0	0	0	0	0	0	0	0
OTU_292	Archaea	Euryarchaeota	Thermoplasmata	Marine Group III	uncultured marine archaeon	uncultured marine archaeon	uncultured marine archaeon	0	1	2	0	0	1	0	5	0	1	5	2	1	0	0	0	0	0	0	0	1	0
OTU_539	Archaea	Thaumarchaeota	Nitrososphaeria	Nitrosopumilales	Nitrosopumilaceae	marine metagenome	marine metagenome	0	0	1	5	1	5	0	0	0	0	0	0	0	0	4	0	0	3	0	0	0	0
OTU_766	Archaea	Thaumarchaeota	Nitrososphaeria	Nitrosopumilales	Nitrosopumilaceae	uncultured marine archaeon	uncultured marine archaeon	0	0	0	3	7	3	0	0	0	0	0	0	0	0	2	0	0	1	0	0	1	2
OTU_908	Archaea	Euryarchaeota	Thermoplasmata	Marine Group II	Marine group II euryarchaeote REDSEA-S19_B7N8	Marine group II euryarchaeote REDSEA-S19_B7N8	Marine group II euryarchaeote REDSEA-S19_B7N8	6	0	0	0	0	1	0	1	11	0	0	0	0	0	0	0	0	0	0	0	0	0
OTU_975	Archaea	Thaumarchaeota	Marine Benthic Group A	uncultured crenarchaeote	uncultured crenarchaeote	uncultured crenarchaeote	uncultured crenarchaeote	0	0	0	0	0	0	0	0	0	2	5	0	0	7	0	5	0	0	0	0	0	0
OTU_1131	Archaea	Thaumarchaeota	Nitrososphaeria	Nitrosopumilales	Nitrosopumilaceae	uncultured marine archaeon	uncultured marine archaeon	0	0	0	0	2	1	0	3	0	0	0	0	2	0	4	0	1	3	0	1	0	3
OTU_124	Archaea	Unclassified	Unclassified	Unclassified	Unclassified	Unclassified	Unclassified	0	0	0	0	0	0	0	0	0	0	0	0	0	0	0	0	0	0	0	0	20	0
OTU_134	Archaea	Euryarchaeota	Thermoplasmata	Marine Group III	uncultured marine group III euryarchaeote	uncultured marine group III euryarchaeote	uncultured marine group III euryarchaeote	0	0	0	0	0	0	0	0	0	0	0	3	15	2	0	0	0	0	0	0	0	0
OTU_147	Archaea	Thaumarchaeota	Nitrososphaeria	Nitrosopumilales	Nitrosopumilaceae	Unclassified	Unclassified	0	0	1	6	0	2	0	0	0	0	0	0	0	0	2	0	7	0	0	1	0	1
OTU_303	Archaea	Euryarchaeota	Thermoplasmata	Marine Group III	uncultured marine archaeon	uncultured marine archaeon	uncultured marine archaeon	0	2	0	0	0	0	0	3	0	1	14	0	0	0	0	0	0	0	0	0	0	0
OTU_416	Archaea	Euryarchaeota	Thermoplasmata	Marine Group III	Marine Group III euryarchaeote SCGC AAA288-E19	Marine Group III euryarchaeote SCGC AAA288-E19	Marine Group III euryarchaeote SCGC AAA288-E19	0	0	3	6	2	4	0	1	0	0	0	0	2	1	0	0	0	0	0	0	1	0
OTU_530	Archaea	Euryarchaeota	Thermoplasmata	Marine Group II	marine metagenome	marine metagenome	marine metagenome	7	0	0	0	0	0	2	1	8	0	0	0	0	1	0	0	0	0	1	0	0	0
OTU_650	Archaea	Euryarchaeota	Thermoplasmata	Marine Group III	uncultured marine archaeon	uncultured marine archaeon	uncultured marine archaeon	0	0	0	0	5	5	0	4	0	0	0	0	3	3	0	0	0	0	0	0	0	0
OTU_1062	Archaea	Euryarchaeota	Thermoplasmata	Marine Group III	uncultured marine archaeon	uncultured marine archaeon	uncultured marine archaeon	0	0	2	0	4	1	0	9	0	0	2	0	0	1	0	0	0	0	0	0	2	0
OTU_127	Archaea	Thaumarchaeota	Marine Benthic Group A	uncultured marine archaeon	uncultured marine archaeon	uncultured marine archaeon	uncultured marine archaeon	0	0	0	0	0	0	0	0	0	0	0	13	3	5	0	0	0	0	0	0	0	0
OTU_491	Archaea	Thaumarchaeota	Nitrososphaeria	Nitrosopumilales	Nitrosopumilaceae	uncultured marine archaeon	uncultured marine archaeon	0	2	1	1	0	3	0	1	0	5	0	0	1	0	1	0	2	1	0	1	0	2
OTU_506	Archaea	Thaumarchaeota	Nitrososphaeria	Nitrosopumilales	Nitrosopumilaceae	Candidatus Nitrosopumilus	uncultured archaeon	0	0	1	0	1	8	0	0	0	0	0	3	1	7	0	0	0	0	0	0	0	0
OTU_545	Archaea	Euryarchaeota	Thermoplasmata	Marine Group II	uncultured marine group II euryarchaeote	uncultured marine group II euryarchaeote	uncultured marine group II euryarchaeote	0	0	1	2	0	1	0	0	0	0	7	5	1	4	0	0	0	0	0	0	0	0
OTU_658	Archaea	Thaumarchaeota	Marine Benthic Group A	uncultured crenarchaeote	uncultured crenarchaeote	uncultured crenarchaeote	uncultured crenarchaeote	0	0	0	0	0	0	0	0	0	0	1	0	10	10	0	0	0	0	0	0	0	0
OTU_72	Archaea	Thaumarchaeota	Nitrososphaeria	Nitrosopumilales	Nitrosopumilaceae	uncultured thaumarchaeote	uncultured thaumarchaeote	0	9	0	0	0	0	0	0	0	7	0	0	0	0	0	4	1	0	0	0	0	0
OTU_135	Archaea	Thaumarchaeota	Nitrososphaeria	Nitrososphaerales	Nitrososphaeraceae	uncultured crenarchaeote	uncultured crenarchaeote	0	0	0	0	0	0	0	0	0	0	0	0	0	0	0	0	22	0	0	0	0	0
OTU_154	Archaea	Euryarchaeota	Thermoplasmata	Marine Group II	metagenome	metagenome	metagenome	1	0	0	0	0	0	0	0	1	0	0	8	0	12	0	0	0	0	0	0	0	0
OTU_380	Archaea	Euryarchaeota	Thermoplasmata	Marine Group II	Unclassified	Unclassified	Unclassified	7	0	0	0	0	0	9	1	4	0	0	0	0	0	0	0	0	0	1	0	0	0
OTU_436	Archaea	Thaumarchaeota	Nitrososphaeria	Nitrosopumilales	Nitrosopumilaceae	Unclassified	Unclassified	0	0	0	0	0	0	0	0	0	0	1	17	4	0	0	0	0	0	0	0	0	0
OTU_715	Archaea	Thaumarchaeota	Nitrososphaeria	Nitrosopumilales	Nitrosopumilaceae	uncultured marine archaeon	uncultured marine archaeon	0	1	0	0	0	0	0	0	0	6	0	0	0	0	0	4	8	0	0	3	0	0
OTU_75	Archaea	Euryarchaeota	Thermoplasmata	Marine Group II	uncultured marine archaeon	uncultured marine archaeon	uncultured marine archaeon	0	0	0	0	2	5	0	0	0	0	0	0	9	6	0	0	0	0	0	0	0	0
OTU_870	Archaea	Thaumarchaeota	Nitrososphaeria	Nitrosopumilales	Nitrosopumilaceae	Candidatus Nitrosopelagicus	uncultured archaeon	1	9	0	0	0	0	0	0	1	9	0	0	0	0	0	2	0	0	0	0	0	0
OTU_95	Archaea	Euryarchaeota	Thermoplasmata	Marine Group II	uncultured marine eukaryote	uncultured marine eukaryote	uncultured marine eukaryote	3	5	0	0	0	0	0	0	1	13	0	0	0	0	0	0	0	0	0	0	0	0
OTU_108	Archaea	Nanoarchaeaeota	Woesearchaeia	uncultured euryarchaeote	uncultured euryarchaeote	uncultured euryarchaeote	uncultured euryarchaeote	0	0	0	5	2	0	0	0	0	0	0	3	10	3	0	0	0	0	0	0	0	0
OTU_1085	Archaea	Thaumarchaeota	Marine Benthic Group A	uncultured marine archaeon	uncultured marine archaeon	uncultured marine archaeon	uncultured marine archaeon	0	4	0	0	0	0	0	0	0	2	2	0	0	0	2	6	2	5	0	0	0	0
OTU_1125	Archaea	Thaumarchaeota	Nitrososphaeria	Nitrosopumilales	Nitrosopumilaceae	uncultured thaumarchaeote	uncultured thaumarchaeote	0	2	2	0	0	0	0	0	0	3	0	0	0	0	0	1	8	0	0	7	0	0
OTU_582	Archaea	Thaumarchaeota	Nitrososphaeria	Nitrosopumilales	Nitrosopumilaceae	uncultured thaumarchaeote	uncultured thaumarchaeote	0	1	0	1	0	0	0	0	0	0	20	1	0	0	0	0	0	0	0	0	0	0
OTU_857	Archaea	Thaumarchaeota	Nitrososphaeria	Nitrosopumilales	Nitrosopumilaceae	Candidatus Nitrosopelagicus	marine metagenome	1	0	0	0	0	0	12	0	9	0	0	0	0	0	0	0	0	0	1	0	0	0
OTU_91	Archaea	Euryarchaeota	Thermoplasmata	Marine Group II	uncultured marine archaeon	uncultured marine archaeon	uncultured marine archaeon	0	0	0	0	0	18	0	0	0	0	0	0	0	5	0	0	0	0	0	0	0	0
OTU_1121	Archaea	Thaumarchaeota	Nitrososphaeria	Nitrosopumilales	Nitrosopumilaceae	Unclassified	Unclassified	0	2	4	2	0	0	0	3	0	0	1	0	0	0	2	4	3	1	0	2	0	0
OTU_190	Archaea	Euryarchaeota	Thermoplasmata	Marine Group III	uncultured marine group III euryarchaeote HF200_25B11	uncultured marine group III euryarchaeote HF200_25B11	uncultured marine group III euryarchaeote HF200_25B11	0	6	0	0	0	0	3	2	0	12	1	0	0	0	0	0	0	0	0	0	0	0
OTU_370	Archaea	Euryarchaeota	Thermoplasmata	Marine Group II	metagenome	metagenome	metagenome	5	0	0	0	0	0	1	0	1	0	0	0	0	0	0	0	0	1	12	0	4	0
OTU_399	Archaea	Euryarchaeota	Thermoplasmata	Marine Group III	uncultured marine archaeon	uncultured marine archaeon	uncultured marine archaeon	0	0	0	0	0	0	0	1	0	1	13	1	0	8	0	0	0	0	0	0	0	0
OTU_752	Archaea	Thaumarchaeota	Nitrososphaeria	Nitrosopumilales	Nitrosopumilaceae	uncultured marine archaeon	uncultured marine archaeon	0	2	9	2	1	1	0	1	0	2	1	0	0	1	0	1	2	0	0	1	0	0
OTU_842	Archaea	Thaumarchaeota	Nitrososphaeria	Nitrosopumilales	Nitrosopumilaceae	uncultured marine archaeon	uncultured marine archaeon	0	0	0	0	0	0	0	0	0	0	22	1	0	0	0	0	1	0	0	0	0	0
OTU_1010	Archaea	Euryarchaeota	Thermoplasmata	Marine Group II	Marine group II euryarchaeote REDSEA-S03_B6	Marine group II euryarchaeote REDSEA-S03_B6	Marine group II euryarchaeote REDSEA-S03_B6	1	1	0	4	1	2	2	3	8	1	0	0	0	0	0	0	0	1	0	0	0	1
OTU_103	Archaea	Euryarchaeota	Thermoplasmata	Marine Group II	uncultured marine archaeon	uncultured marine archaeon	uncultured marine archaeon	1	0	0	0	1	11	0	4	1	0	4	1	1	1	0	0	0	0	0	0	0	0
OTU_1097	Archaea	Thaumarchaeota	Nitrososphaeria	Nitrosopumilales	Nitrosopumilaceae	uncultured marine archaeon	uncultured marine archaeon	0	0	1	5	0	4	0	0	0	0	0	0	1	0	7	0	1	5	0	0	0	1
OTU_282	Archaea	Thaumarchaeota	Nitrososphaeria	Nitrosopumilales	Nitrosopumilaceae	Candidatus Nitrosopumilus	Unclassified	0	0	0	1	0	22	0	2	0	0	0	0	0	0	0	0	0	0	0	0	0	0
OTU_331	Archaea	Thaumarchaeota	Nitrososphaeria	Nitrosopumilales	Nitrosopumilaceae	uncultured marine archaeon	uncultured marine archaeon	0	0	1	5	5	1	0	0	0	0	0	2	0	2	9	0	0	0	0	0	0	0
OTU_373	Archaea	Thaumarchaeota	Nitrososphaeria	Nitrosopumilales	Nitrosopumilaceae	Unclassified	Unclassified	0	2	2	2	1	1	0	1	0	4	2	0	0	0	3	1	1	0	1	4	0	0
OTU_1111	Archaea	Euryarchaeota	Thermoplasmata	Marine Group II	Marine group II euryarchaeote REDSEA-S19_B7N8	Marine group II euryarchaeote REDSEA-S19_B7N8	Marine group II euryarchaeote REDSEA-S19_B7N8	11	0	0	0	0	0	2	2	11	0	0	0	0	0	0	0	0	0	0	0	0	0
OTU_483	Archaea	Thaumarchaeota	Nitrososphaeria	Nitrosopumilales	Nitrosopumilaceae	uncultured marine archaeon	uncultured marine archaeon	0	1	0	2	7	3	0	1	1	2	0	1	2	1	2	0	0	2	0	0	0	1
OTU_148	Archaea	Thaumarchaeota	Nitrososphaeria	Nitrosopumilales	Nitrosopumilaceae	Unclassified	Unclassified	0	3	0	0	0	2	0	0	0	3	0	0	0	0	0	4	9	0	0	6	0	0
OTU_1001	Archaea	Euryarchaeota	Thermoplasmata	Marine Group II	uncultured marine group II/III euryarchaeote AD1000_31_C10	uncultured marine group II/III euryarchaeote AD1000_31_C10	uncultured marine group II/III euryarchaeote AD1000_31_C10	0	1	3	3	0	2	0	1	0	3	3	0	0	0	0	1	0	4	0	0	4	3
OTU_149	Archaea	Nanoarchaeaeota	Woesearchaeia	Unclassified	Unclassified	Unclassified	Unclassified	0	0	0	0	0	1	0	12	0	3	1	0	0	1	0	0	0	0	0	0	10	0
OTU_536	Archaea	Thaumarchaeota	Nitrososphaeria	Nitrosopumilales	Nitrosopumilaceae	uncultured marine archaeon	uncultured marine archaeon	1	6	2	3	2	0	0	2	0	2	1	0	0	0	0	1	4	1	0	2	0	1
OTU_88	Archaea	Nanoarchaeaeota	Woesearchaeia	marine metagenome	marine metagenome	marine metagenome	marine metagenome	0	0	0	0	19	1	0	3	0	0	0	0	0	3	0	0	0	0	0	1	1	0
OTU_996	Archaea	Euryarchaeota	Thermoplasmata	Marine Group II	Marine group II euryarchaeote REDSEA-S03_B6	Marine group II euryarchaeote REDSEA-S03_B6	Marine group II euryarchaeote REDSEA-S03_B6	4	0	0	0	0	0	23	0	1	0	0	0	0	0	0	0	0	0	0	0	0	0
OTU_1018	Archaea	Thaumarchaeota	Nitrososphaeria	Nitrosopumilales	Nitrosopumilaceae	uncultured archaeon	uncultured archaeon	0	4	5	4	1	2	0	3	0	1	0	0	0	0	3	0	2	3	0	0	0	1
OTU_162	Archaea	Euryarchaeota	Thermoplasmata	Marine Group II	Unclassified	Unclassified	Unclassified	0	0	0	0	1	3	0	0	0	0	0	1	15	9	0	0	0	0	0	0	0	0
OTU_255	Archaea	Thaumarchaeota	Marine Benthic Group A	uncultured marine crenarchaeote KM3-153-F8	uncultured marine crenarchaeote KM3-153-F8	uncultured marine crenarchaeote KM3-153-F8	uncultured marine crenarchaeote KM3-153-F8	0	0	0	0	0	0	0	0	0	0	0	6	11	12	0	0	0	0	0	0	0	0
OTU_782	Archaea	Euryarchaeota	Thermoplasmata	Marine Group III	uncultured archaeon	uncultured archaeon	uncultured archaeon	4	0	0	0	0	0	18	0	7	0	0	0	0	0	0	0	0	0	0	0	0	0
OTU_807	Archaea	Euryarchaeota	Thermoplasmata	Marine Group II	uncultured marine group II/III euryarchaeote AD1000_31_C10	uncultured marine group II/III euryarchaeote AD1000_31_C10	uncultured marine group II/III euryarchaeote AD1000_31_C10	0	0	2	1	1	2	0	1	0	0	3	1	0	1	0	0	2	4	0	0	7	4
OTU_1014	Archaea	Euryarchaeota	Thermoplasmata	Marine Group II	uncultured marine microorganism HF200_10-06-02	uncultured marine microorganism HF200_10-06-02	uncultured marine microorganism HF200_10-06-02	0	11	0	0	3	3	0	0	2	7	0	0	2	0	0	0	0	1	0	0	1	0
OTU_1023	Archaea	Thaumarchaeota	Nitrososphaeria	Nitrosopumilales	Nitrosopumilaceae	uncultured marine crenarchaeote SAT1000-23-F7	uncultured marine crenarchaeote SAT1000-23-F7	0	3	4	1	2	1	0	1	1	2	1	0	0	0	2	2	1	1	0	4	0	4
OTU_441	Archaea	Thaumarchaeota	Marine Benthic Group A	uncultured marine crenarchaeote KM3-153-F8	uncultured marine crenarchaeote KM3-153-F8	uncultured marine crenarchaeote KM3-153-F8	uncultured marine crenarchaeote KM3-153-F8	0	0	0	0	2	0	0	1	0	0	0	7	0	19	0	0	1	0	0	0	0	0
OTU_53	Archaea	Euryarchaeota	Thermoplasmata	Marine Group II	marine metagenome	marine metagenome	marine metagenome	8	0	0	0	0	1	3	7	11	0	0	0	0	0	0	0	0	0	0	0	0	0
OTU_1069	Archaea	Euryarchaeota	Thermoplasmata	Marine Group III	uncultured archaeon	uncultured archaeon	uncultured archaeon	19	0	0	0	0	0	9	0	2	0	0	0	0	0	0	0	0	0	0	0	1	0
OTU_295	Archaea	Nanoarchaeaeota	Woesearchaeia	Unclassified	Unclassified	Unclassified	Unclassified	0	0	0	1	0	0	0	0	0	0	0	19	4	7	0	0	0	0	0	0	0	0
OTU_350	Archaea	Euryarchaeota	Thermoplasmata	Marine Group II	uncultured archaeon	uncultured archaeon	uncultured archaeon	0	0	0	0	0	0	0	7	0	0	1	20	1	2	0	0	0	0	0	0	0	0
OTU_99	Archaea	Euryarchaeota	Thermoplasmata	Marine Group II	uncultured marine group II euryarchaeote	uncultured marine group II euryarchaeote	uncultured marine group II euryarchaeote	0	5	12	4	0	1	0	0	0	4	5	0	0	0	0	0	0	0	0	0	0	0
OTU_146	Archaea	Euryarchaeota	Thermoplasmata	Marine Group III	uncultured marine archaeon	uncultured marine archaeon	uncultured marine archaeon	0	0	2	0	0	1	0	0	1	2	22	2	1	1	0	0	0	0	0	0	0	0
OTU_588	Archaea	Euryarchaeota	Thermoplasmata	Marine Group II	Marine group II euryarchaeote REDSEA-S03_B6	Marine group II euryarchaeote REDSEA-S03_B6	Marine group II euryarchaeote REDSEA-S03_B6	1	0	0	0	5	2	0	0	13	1	1	0	0	1	0	0	1	5	0	0	0	2
OTU_598	Archaea	Euryarchaeota	Thermoplasmata	Marine Group II	uncultured euryarchaeote	uncultured euryarchaeote	uncultured euryarchaeote	2	5	0	0	0	0	0	2	0	16	0	0	0	0	0	0	0	0	0	0	7	0
OTU_948	Archaea	Euryarchaeota	Thermoplasmata	Marine Group II	Unclassified	Unclassified	Unclassified	0	0	0	2	0	6	0	0	2	0	1	0	0	0	0	1	2	11	0	0	2	5
OTU_1068	Archaea	Euryarchaeota	Thermoplasmata	Marine Group III	uncultured archaeon	uncultured archaeon	uncultured archaeon	8	0	0	0	0	1	7	0	8	0	0	0	0	0	0	0	0	0	0	0	9	0
OTU_345	Archaea	Thaumarchaeota	Nitrososphaeria	Nitrosopumilales	Nitrosopumilaceae	Unclassified	Unclassified	1	4	1	0	0	0	1	0	0	0	0	0	0	0	0	13	6	0	0	7	0	0
OTU_824	Archaea	Thaumarchaeota	Nitrososphaeria	Nitrosopumilales	Nitrosopumilaceae	uncultured marine archaeon	uncultured marine archaeon	1	4	2	2	1	2	0	2	0	4	3	0	0	0	1	1	4	0	0	3	0	3
OTU_827	Archaea	Euryarchaeota	Thermoplasmata	Marine Group II	uncultured marine group II/III euryarchaeote AD1000_31_C10	uncultured marine group II/III euryarchaeote AD1000_31_C10	uncultured marine group II/III euryarchaeote AD1000_31_C10	0	0	2	2	2	1	0	1	0	0	0	0	0	0	0	1	0	5	0	0	9	10
OTU_577	Archaea	Euryarchaeota	Thermoplasmata	Marine Group II	uncultured marine group II/III euryarchaeote AD1000_31_C10	uncultured marine group II/III euryarchaeote AD1000_31_C10	uncultured marine group II/III euryarchaeote AD1000_31_C10	0	1	18	1	1	1	0	1	0	1	0	0	0	0	0	0	2	2	0	0	3	3
OTU_307	Archaea	Thaumarchaeota	Nitrososphaeria	Nitrosopumilales	Nitrosopumilaceae	uncultured archaeon	uncultured archaeon	0	5	0	0	0	0	0	0	0	2	0	0	0	0	0	8	12	0	0	8	0	0
OTU_499	Archaea	Thaumarchaeota	Nitrososphaeria	Nitrosopumilales	Nitrosopumilaceae	Candidatus Nitrosopelagicus	marine metagenome	1	0	0	0	0	0	13	0	11	0	0	0	0	0	1	2	0	0	7	0	0	0
OTU_519	Archaea	Euryarchaeota	Thermoplasmata	Marine Group II	uncultured marine group II/III euryarchaeote AD1000_108_D01	uncultured marine group II/III euryarchaeote AD1000_108_D01	uncultured marine group II/III euryarchaeote AD1000_108_D01	0	14	0	0	0	0	0	0	0	19	0	0	0	0	0	0	0	0	1	1	0	0
OTU_525	Archaea	Thaumarchaeota	Nitrososphaeria	Nitrosopumilales	Nitrosopumilaceae	marine metagenome	marine metagenome	0	0	0	0	0	0	0	0	0	0	8	20	4	3	0	0	0	0	0	0	0	0
OTU_580	Archaea	Euryarchaeota	Thermoplasmata	Marine Group III	uncultured marine archaeon	uncultured marine archaeon	uncultured marine archaeon	0	5	1	0	0	0	0	24	0	4	1	0	0	0	0	0	0	0	0	0	0	0
OTU_829	Archaea	Thaumarchaeota	Marine Benthic Group A	uncultured marine archaeon	uncultured marine archaeon	uncultured marine archaeon	uncultured marine archaeon	0	0	0	6	9	7	0	0	0	0	5	0	2	0	1	1	0	4	0	0	0	0
OTU_591	Archaea	Euryarchaeota	Thermoplasmata	Marine Group II	uncultured marine group II/III euryarchaeote AD1000_31_C10	uncultured marine group II/III euryarchaeote AD1000_31_C10	uncultured marine group II/III euryarchaeote AD1000_31_C10	0	0	0	0	0	1	0	0	0	0	34	0	0	1	0	0	0	0	0	0	0	0
OTU_813	Archaea	Thaumarchaeota	Nitrososphaeria	Nitrosopumilales	Nitrosopumilaceae	marine metagenome	marine metagenome	0	0	2	4	5	2	0	0	0	2	3	0	2	1	2	0	0	13	0	0	0	0
OTU_941	Archaea	Euryarchaeota	Thermoplasmata	Marine Group III	Unclassified	Unclassified	Unclassified	30	0	0	0	0	0	0	0	6	0	0	0	0	0	0	0	0	0	0	0	0	0
OTU_645	Archaea	Thaumarchaeota	Nitrososphaeria	Nitrosopumilales	Nitrosopumilaceae	uncultured marine archaeon	uncultured marine archaeon	0	0	0	0	0	0	0	0	0	0	11	19	5	2	0	0	0	0	0	0	0	0
OTU_83	Archaea	Unclassified	Unclassified	Unclassified	Unclassified	Unclassified	Unclassified	0	0	0	0	0	0	0	0	0	0	0	0	0	0	17	0	16	0	0	2	0	2
OTU_938	Archaea	Euryarchaeota	Thermoplasmata	Marine Group II	uncultured marine group II/III euryarchaeote AD1000_31_C10	uncultured marine group II/III euryarchaeote AD1000_31_C10	uncultured marine group II/III euryarchaeote AD1000_31_C10	0	0	2	0	0	0	0	0	0	0	0	0	0	0	0	0	1	0	0	2	15	17
OTU_170	Archaea	Nanoarchaeaeota	Woesearchaeia	marine metagenome	marine metagenome	marine metagenome	marine metagenome	0	0	0	0	1	0	0	0	0	0	0	31	5	0	0	0	0	0	0	0	1	0
OTU_56	Archaea	Euryarchaeota	Thermoplasmata	Marine Group III	uncultured marine group III euryarchaeote	uncultured marine group III euryarchaeote	uncultured marine group III euryarchaeote	0	1	0	4	10	15	0	0	0	2	0	0	5	3	0	0	0	0	0	0	0	0
OTU_729	Archaea	Euryarchaeota	Thermoplasmata	Marine Group III	uncultured marine archaeon	uncultured marine archaeon	uncultured marine archaeon	0	0	4	0	1	0	0	13	0	6	1	0	0	1	0	0	0	0	0	0	14	0
OTU_254	Archaea	Thaumarchaeota	Nitrososphaeria	Nitrosopumilales	Nitrosopumilaceae	uncultured archaeon	uncultured archaeon	0	2	2	0	0	0	0	0	0	2	23	11	0	0	0	0	0	0	0	1	0	0
OTU_271	Archaea	Euryarchaeota	Thermoplasmata	Marine Group II	uncultured marine group II euryarchaeote	uncultured marine group II euryarchaeote	uncultured marine group II euryarchaeote	0	0	0	0	0	1	0	0	0	0	2	9	6	23	0	0	0	0	0	0	0	0
OTU_158	Archaea	Crenarchaeota	Thermoprotei	Thermoproteales	Thermoproteaceae	Unclassified	Unclassified	0	0	0	0	0	0	0	0	0	0	0	0	0	0	0	0	0	0	42	0	0	0
OTU_797	Archaea	Thaumarchaeota	Nitrososphaeria	Nitrosopumilales	Nitrosopumilaceae	uncultured marine archaeon	uncultured marine archaeon	0	2	0	0	0	0	0	0	0	8	0	0	0	0	0	5	17	0	0	10	0	0
OTU_894	Archaea	Thaumarchaeota	Nitrososphaeria	Nitrosopumilales	Nitrosopumilaceae	Candidatus Nitrosopelagicus	marine metagenome	9	1	0	0	0	0	10	0	19	0	0	0	0	0	0	0	0	1	1	1	0	0
OTU_998	Archaea	Euryarchaeota	Thermoplasmata	Marine Group II	Unclassified	Unclassified	Unclassified	0	4	1	4	2	1	0	0	1	5	0	0	1	4	0	3	0	3	2	2	0	9
OTU_126	Archaea	Euryarchaeota	Thermoplasmata	Marine Group II	uncultured marine eukaryote	uncultured marine eukaryote	uncultured marine eukaryote	0	0	0	0	1	1	0	2	0	0	5	7	8	15	0	0	0	0	0	0	4	0
OTU_745	Archaea	Euryarchaeota	Thermoplasmata	Marine Group III	uncultured marine archaeon	uncultured marine archaeon	uncultured marine archaeon	0	1	1	0	0	0	0	9	0	2	19	3	3	0	0	0	0	0	0	0	5	0
OTU_142	Archaea	Euryarchaeota	Halobacteria	Halobacteriales	Haloferacaceae	Natronococcus	Natronococcus jeotgali	0	0	0	0	0	0	0	0	0	0	0	0	0	0	0	0	0	0	0	0	44	0
OTU_198	Archaea	Euryarchaeota	Thermoplasmata	Marine Group II	marine metagenome	marine metagenome	marine metagenome	13	0	0	0	0	0	24	0	7	0	0	0	0	0	0	0	0	0	0	0	0	0
OTU_117	Archaea	Nanoarchaeaeota	Woesearchaeia	uncultured euryarchaeote	uncultured euryarchaeote	uncultured euryarchaeote	uncultured euryarchaeote	0	0	0	0	0	0	0	0	0	0	0	21	0	0	0	0	0	0	0	0	24	0
OTU_1093	Archaea	Euryarchaeota	Thermoplasmata	Marine Group II	uncultured marine group II/III euryarchaeote AD1000_31_C10	uncultured marine group II/III euryarchaeote AD1000_31_C10	uncultured marine group II/III euryarchaeote AD1000_31_C10	1	1	3	5	0	1	0	4	1	4	0	0	0	0	0	0	0	14	0	0	6	6
OTU_114	Archaea	Euryarchaeota	Thermoplasmata	Marine Group II	uncultured marine group II euryarchaeote	uncultured marine group II euryarchaeote	uncultured marine group II euryarchaeote	0	0	0	0	1	2	0	0	0	0	0	1	4	38	0	0	0	0	0	0	0	0
OTU_559	Archaea	Thaumarchaeota	Nitrososphaeria	Nitrosopumilales	Nitrosopumilaceae	uncultured thaumarchaeote	uncultured thaumarchaeote	0	3	8	8	1	3	0	8	0	10	3	0	0	0	0	0	1	0	0	1	0	0
OTU_631	Archaea	Euryarchaeota	Thermoplasmata	Marine Group II	Marine group II euryarchaeote REDSEA-S03_B6	Marine group II euryarchaeote REDSEA-S03_B6	Marine group II euryarchaeote REDSEA-S03_B6	8	1	1	0	0	1	22	0	8	4	0	0	0	0	0	0	0	0	0	0	0	1
OTU_749	Archaea	Euryarchaeota	Thermoplasmata	Marine Group II	uncultured marine group II euryarchaeote HF130_40G09	uncultured marine group II euryarchaeote HF130_40G09	uncultured marine group II euryarchaeote HF130_40G09	0	7	0	0	0	0	0	10	0	6	4	0	0	0	0	0	0	0	0	0	19	0
OTU_914	Archaea	Thaumarchaeota	Nitrososphaeria	Nitrosopumilales	Nitrosopumilaceae	Unclassified	Unclassified	0	0	0	0	0	0	0	0	0	4	0	0	0	0	0	11	21	0	0	10	0	0
OTU_229	Archaea	Euryarchaeota	Thermoplasmata	Marine Group II	uncultured marine group II/III euryarchaeote AD1000_108_D01	uncultured marine group II/III euryarchaeote AD1000_108_D01	uncultured marine group II/III euryarchaeote AD1000_108_D01	2	30	0	0	0	0	0	0	0	16	0	0	0	0	0	0	0	0	0	0	0	0
OTU_653	Archaea	Euryarchaeota	Thermoplasmata	Marine Group III	uncultured marine archaeon	uncultured marine archaeon	uncultured marine archaeon	0	2	3	2	0	2	0	18	0	9	6	0	0	0	0	0	0	0	0	0	6	0
OTU_738	Archaea	Thaumarchaeota	Nitrososphaeria	Nitrosopumilales	Nitrosopumilaceae	marine metagenome	marine metagenome	0	0	0	3	4	8	0	0	0	0	1	1	1	2	15	0	3	4	0	0	0	6
OTU_362	Archaea	Euryarchaeota	Thermoplasmata	Marine Group III	Marine Group III euryarchaeote SCGC AAA288-E19	Marine Group III euryarchaeote SCGC AAA288-E19	Marine Group III euryarchaeote SCGC AAA288-E19	0	0	6	0	0	0	0	13	0	0	30	0	0	0	0	0	0	0	0	0	0	0
OTU_314	Archaea	Thaumarchaeota	Nitrososphaeria	Nitrosopumilales	Nitrosopumilaceae	uncultured marine archaeon	uncultured marine archaeon	0	2	0	6	4	7	0	2	0	2	0	8	2	1	4	0	4	6	0	0	0	3
OTU_911	Archaea	Thaumarchaeota	Nitrososphaeria	Nitrosopumilales	Nitrosopumilaceae	uncultured marine archaeon	uncultured marine archaeon	0	4	3	2	2	0	0	0	0	7	1	0	0	0	1	10	5	3	0	12	0	2
OTU_1004	Archaea	Euryarchaeota	Thermoplasmata	Marine Group III	uncultured marine archaeon	uncultured marine archaeon	uncultured marine archaeon	0	0	11	0	5	3	0	22	0	2	1	0	2	2	0	0	0	0	0	1	4	0
OTU_452	Archaea	Euryarchaeota	Thermoplasmata	Marine Group II	marine metagenome	marine metagenome	marine metagenome	21	0	1	0	0	2	2	2	25	1	0	0	0	0	0	0	0	0	0	0	0	0
OTU_77	Archaea	Thaumarchaeota	Nitrososphaeria	Nitrosopumilales	Nitrosopumilaceae	Candidatus Nitrosopelagicus	uncultured archaeon	0	18	0	0	0	0	2	0	0	18	0	0	0	0	0	17	0	0	0	0	0	0
OTU_175	Archaea	Thaumarchaeota	Nitrososphaeria	Nitrosopumilales	Nitrosopumilaceae	uncultured archaeon	uncultured archaeon	0	5	12	2	0	2	0	1	0	10	1	0	0	0	0	8	6	0	0	12	0	0
OTU_770	Archaea	Thaumarchaeota	Nitrososphaeria	Nitrosopumilales	Nitrosopumilaceae	uncultured marine archaeon	uncultured marine archaeon	0	0	3	9	5	6	0	0	0	0	2	0	1	3	8	0	3	17	0	0	0	2
OTU_472	Archaea	Nanoarchaeaeota	Woesearchaeia	marine metagenome	marine metagenome	marine metagenome	marine metagenome	0	0	0	2	1	0	0	0	0	0	0	23	3	5	0	0	2	0	0	23	1	0
OTU_761	Archaea	Euryarchaeota	Thermoplasmata	Marine Group III	uncultured marine archaeon	uncultured marine archaeon	uncultured marine archaeon	0	1	0	2	14	20	0	4	0	0	0	2	5	11	0	0	0	0	0	0	1	0
OTU_315	Archaea	Thaumarchaeota	Nitrososphaeria	Nitrosopumilales	Nitrosopumilaceae	uncultured marine archaeon	uncultured marine archaeon	2	8	0	0	1	1	0	0	0	13	0	0	1	0	0	7	15	0	0	14	0	0
OTU_1109	Archaea	Thaumarchaeota	Nitrososphaeria	Nitrosopumilales	Nitrosopumilaceae	Candidatus Nitrosopelagicus	marine metagenome	2	1	0	0	0	0	17	0	17	2	0	1	5	0	0	1	2	0	12	3	0	0
OTU_1139	Archaea	Thaumarchaeota	Nitrososphaeria	Nitrosopumilales	Nitrosopumilaceae	Candidatus Nitrosopelagicus	uncultured archaeon	0	15	0	0	1	0	0	0	1	15	0	0	0	0	0	29	0	0	0	3	0	0
OTU_849	Archaea	Thaumarchaeota	Nitrososphaeria	Nitrosopumilales	Nitrosopumilaceae	marine metagenome	marine metagenome	0	0	0	0	0	0	0	0	0	0	9	42	9	4	0	0	0	0	0	0	0	0
OTU_757	Archaea	Thaumarchaeota	Nitrososphaeria	Nitrosopumilales	Nitrosopumilaceae	uncultured marine crenarchaeote SAT1000-23-F7	uncultured marine crenarchaeote SAT1000-23-F7	0	1	5	13	6	3	0	3	1	4	16	0	4	1	1	1	1	0	0	5	0	2
OTU_774	Archaea	Thaumarchaeota	Nitrososphaeria	Nitrosopumilales	Nitrosopumilaceae	marine metagenome	marine metagenome	0	0	1	2	2	1	0	1	0	0	6	30	9	10	1	0	1	2	0	0	1	0
OTU_949	Archaea	Euryarchaeota	Thermoplasmata	Marine Group II	Marine group II euryarchaeote REDSEA-S03_B6	Marine group II euryarchaeote REDSEA-S03_B6	Marine group II euryarchaeote REDSEA-S03_B6	13	2	0	0	0	0	44	1	6	1	0	0	0	0	0	0	0	0	0	0	0	0
OTU_196	Archaea	Euryarchaeota	Thermoplasmata	Marine Group II	metagenome	metagenome	metagenome	18	0	0	0	0	0	5	2	14	0	0	0	0	0	0	4	0	11	6	0	8	0
OTU_392	Archaea	Thaumarchaeota	Nitrososphaeria	Nitrosopumilales	Nitrosopumilaceae	uncultured thaumarchaeote	uncultured thaumarchaeote	0	7	22	0	2	0	0	4	0	8	6	0	0	0	0	5	1	0	0	12	1	0
OTU_915	Archaea	Euryarchaeota	Methanomicrobia	Methanosarcinales	Methanosaetaceae	Methanosaeta	uncultured euryarchaeote	0	0	0	0	0	0	0	0	0	0	0	0	0	0	0	0	0	20	49	0	0	0
OTU_988	Archaea	Euryarchaeota	Thermoplasmata	Marine Group III	Marine Group III euryarchaeote SCGC AAA288-E19	Marine Group III euryarchaeote SCGC AAA288-E19	Marine Group III euryarchaeote SCGC AAA288-E19	0	0	8	17	8	12	0	1	0	0	9	3	0	7	0	0	0	0	0	0	4	0
OTU_1095	Archaea	Thaumarchaeota	Nitrososphaeria	Nitrosopumilales	Nitrosopumilaceae	uncultured marine archaeon	uncultured marine archaeon	0	0	0	0	0	0	0	0	0	0	5	34	26	5	0	0	0	0	0	0	0	0
OTU_394	Archaea	Thaumarchaeota	Nitrososphaeria	Nitrosopumilales	Nitrosopumilaceae	Candidatus Nitrosopelagicus	marine metagenome	2	1	1	0	0	0	26	0	22	0	0	0	0	0	2	1	0	2	13	0	0	0
OTU_417	Archaea	Thaumarchaeota	Nitrososphaeria	Nitrosopumilales	Nitrosopumilaceae	Unclassified	Unclassified	0	0	1	10	20	14	0	1	0	0	0	0	1	3	9	0	1	6	0	0	0	6
OTU_71	Archaea	Nanoarchaeaeota	Woesearchaeia	uncultured euryarchaeote	uncultured euryarchaeote	uncultured euryarchaeote	uncultured euryarchaeote	0	0	0	10	14	5	0	0	0	0	0	0	1	3	0	0	0	0	0	1	38	0
OTU_1090	Archaea	Thaumarchaeota	Marine Benthic Group A	uncultured marine archaeon	uncultured marine archaeon	uncultured marine archaeon	uncultured marine archaeon	0	0	0	2	2	1	0	0	0	0	0	0	0	1	32	2	0	27	0	0	0	7
OTU_155	Archaea	Euryarchaeota	Thermoplasmata	Marine Group II	uncultured marine group II euryarchaeote HF10_30F11	uncultured marine group II euryarchaeote HF10_30F11	uncultured marine group II euryarchaeote HF10_30F11	0	0	0	0	7	6	3	24	33	1	0	0	1	0	0	0	0	0	0	0	0	0
OTU_104	Archaea	Nanoarchaeaeota	Woesearchaeia	uncultured bacterium	uncultured bacterium	uncultured bacterium	uncultured bacterium	0	0	0	0	0	0	0	42	0	0	0	0	0	0	0	0	0	0	0	1	33	0
OTU_876	Archaea	Euryarchaeota	Thermoplasmata	Marine Group III	uncultured marine archaeon	uncultured marine archaeon	uncultured marine archaeon	0	0	1	8	6	9	0	17	0	0	10	1	9	11	0	0	0	0	0	0	4	0
OTU_237	Archaea	Thaumarchaeota	Nitrososphaeria	Nitrosopumilales	Nitrosopumilaceae	uncultured thaumarchaeote	uncultured thaumarchaeote	0	9	3	0	0	0	0	0	0	17	0	0	0	0	0	18	18	0	0	12	0	0
OTU_186	Archaea	Euryarchaeota	Thermoplasmata	Marine Group II	Unclassified	Unclassified	Unclassified	0	2	2	3	2	1	0	27	0	0	17	17	6	5	0	0	0	0	0	0	0	0
OTU_200	Archaea	Euryarchaeota	Thermoplasmata	Marine Group II	marine metagenome	marine metagenome	marine metagenome	46	0	0	0	0	0	20	0	16	0	0	0	0	0	0	0	0	0	0	0	0	0
OTU_575	Archaea	Euryarchaeota	Thermoplasmata	Marine Group II	uncultured marine group II euryarchaeote	uncultured marine group II euryarchaeote	uncultured marine group II euryarchaeote	0	1	4	0	2	0	0	74	0	2	0	0	0	0	0	0	0	0	0	0	1	0
OTU_96	Archaea	Thaumarchaeota	Nitrososphaeria	Nitrososphaerales	Nitrososphaeraceae	Unclassified	Unclassified	0	0	0	0	0	0	0	0	0	0	0	0	0	0	0	0	85	0	0	0	0	0
OTU_1136	Archaea	Euryarchaeota	Thermoplasmata	Marine Group II	marine metagenome	marine metagenome	marine metagenome	30	0	0	0	2	0	23	2	13	0	0	0	0	0	0	0	0	0	0	0	16	0
OTU_680	Archaea	Thaumarchaeota	Nitrososphaeria	Nitrosopumilales	Nitrosopumilaceae	Candidatus Nitrosopelagicus	uncultured archaeon	0	14	0	0	0	0	0	0	7	13	0	0	0	0	0	26	12	0	1	13	0	0
OTU_718	Archaea	Thaumarchaeota	Nitrososphaeria	Nitrosopumilales	Nitrosopumilaceae	Candidatus Nitrosopumilus	uncultured archaeon	0	0	0	3	7	55	0	11	3	0	0	0	1	5	0	1	0	0	0	0	0	0
OTU_125	Archaea	Thaumarchaeota	Group 1.1c	uncultured marine group I thaumarchaeote	uncultured marine group I thaumarchaeote	uncultured marine group I thaumarchaeote	uncultured marine group I thaumarchaeote	0	0	12	5	29	10	0	0	0	0	10	3	8	11	0	0	0	0	0	0	0	0
OTU_321	Archaea	Euryarchaeota	Thermoplasmata	Marine Group III	uncultured marine archaeon	uncultured marine archaeon	uncultured marine archaeon	1	41	0	0	0	0	0	31	0	15	1	0	0	0	0	0	0	0	0	0	0	0
OTU_994	Archaea	Nanoarchaeaeota	Woesearchaeia	marine metagenome	marine metagenome	marine metagenome	marine metagenome	0	0	0	0	0	1	0	17	0	0	0	0	1	0	0	0	66	0	0	4	0	0
OTU_458	Archaea	Euryarchaeota	Thermoplasmata	Marine Group II	uncultured marine group II/III euryarchaeote AD1000_31_C10	uncultured marine group II/III euryarchaeote AD1000_31_C10	uncultured marine group II/III euryarchaeote AD1000_31_C10	1	1	11	3	4	3	0	3	0	2	21	1	1	0	0	0	4	18	0	0	11	6
OTU_81	Archaea	Thaumarchaeota	Nitrososphaeria	Nitrosopumilales	Nitrosopumilaceae	Candidatus Nitrosopelagicus	uncultured archaeon	1	25	0	0	0	0	0	0	0	12	0	0	0	0	0	30	0	0	0	22	0	0
OTU_55	Archaea	Thaumarchaeota	Nitrososphaeria	Nitrosopumilales	Nitrosopumilaceae	Candidatus Nitrosopumilus	Unclassified	0	0	0	0	13	47	0	8	0	1	0	0	4	8	9	0	0	0	0	0	2	0
OTU_244	Archaea	Nanoarchaeaeota	Woesearchaeia	uncultured archaeon	uncultured archaeon	uncultured archaeon	uncultured archaeon	0	0	0	6	6	4	0	0	0	0	0	28	27	10	0	0	0	0	0	0	0	13
OTU_570	Archaea	Thaumarchaeota	Nitrososphaeria	Nitrosopumilales	Nitrosopumilaceae	uncultured marine crenarchaeote SAT1000-23-F7	uncultured marine crenarchaeote SAT1000-23-F7	0	1	5	22	12	7	0	7	0	3	2	0	8	7	5	0	5	0	0	2	2	8
OTU_74	Archaea	Thaumarchaeota	Nitrososphaeria	Nitrosopumilales	Nitrosopumilaceae	uncultured thaumarchaeote	uncultured thaumarchaeote	0	12	22	4	1	1	0	19	0	14	11	0	0	0	0	7	1	0	0	6	0	0
OTU_348	Archaea	Thaumarchaeota	Nitrososphaeria	Nitrosopumilales	Nitrosopumilaceae	uncultured marine archaeon	uncultured marine archaeon	0	5	11	11	4	1	0	6	1	6	5	0	2	0	4	4	5	19	0	9	1	5
OTU_38	Archaea	Unclassified	Unclassified	Unclassified	Unclassified	Unclassified	Unclassified	0	0	0	0	0	0	0	0	0	0	0	0	0	0	0	0	0	0	0	99	1	0
OTU_320	Archaea	Thaumarchaeota	Nitrososphaeria	Nitrosopumilales	Nitrosopumilaceae	Unclassified	Unclassified	0	2	7	18	16	10	0	2	0	2	2	0	3	8	11	0	6	9	0	2	0	4
OTU_199	Archaea	Euryarchaeota	Thermoplasmata	Marine Group III	Unclassified	Unclassified	Unclassified	0	1	15	3	11	32	0	16	0	1	4	0	3	8	0	0	0	0	0	0	10	0
OTU_1124	Archaea	Thaumarchaeota	Nitrososphaeria	Nitrosopumilales	Nitrosopumilaceae	uncultured marine archaeon	uncultured marine archaeon	0	8	0	2	0	0	0	1	0	9	0	0	0	0	0	31	26	1	0	28	0	0
OTU_205	Archaea	Thaumarchaeota	Nitrososphaeria	Nitrosopumilales	Nitrosopumilaceae	Candidatus Nitrosopelagicus	marine metagenome	3	0	0	0	0	0	9	0	92	2	0	0	0	0	0	0	1	0	0	0	0	0
OTU_70	Archaea	Thaumarchaeota	Nitrososphaeria	Nitrosopumilales	Nitrosopumilaceae	Candidatus Nitrosopumilus	uncultured marine archaeon	0	0	0	1	13	34	0	0	0	0	0	2	20	37	0	0	0	0	0	0	0	0
OTU_79	Archaea	Euryarchaeota	Thermoplasmata	Marine Group II	uncultured marine group II euryarchaeote	uncultured marine group II euryarchaeote	uncultured marine group II euryarchaeote	0	0	0	9	14	41	0	0	0	0	4	0	10	25	0	0	0	0	0	0	5	0
OTU_946	Archaea	Euryarchaeota	Thermoplasmata	Marine Group II	uncultured marine group II/III euryarchaeote AD1000_31_C10	uncultured marine group II/III euryarchaeote AD1000_31_C10	uncultured marine group II/III euryarchaeote AD1000_31_C10	0	2	10	5	3	5	0	4	0	3	3	0	0	0	0	1	2	48	0	0	9	14
OTU_232	Archaea	Thaumarchaeota	Nitrososphaeria	Nitrosopumilales	Nitrosopumilaceae	Candidatus Nitrosopelagicus	uncultured archaeon	0	3	0	0	0	0	2	0	1	9	0	0	0	0	11	42	16	0	0	28	0	0
OTU_224	Archaea	Thaumarchaeota	Nitrososphaeria	Nitrosopumilales	Nitrosopumilaceae	uncultured thaumarchaeote	uncultured thaumarchaeote	0	3	21	1	1	4	0	40	0	6	10	0	0	0	0	2	1	0	0	4	22	0
OTU_51	Archaea	Euryarchaeota	Thermoplasmata	Marine Group II	uncultured marine group II euryarchaeote	uncultured marine group II euryarchaeote	uncultured marine group II euryarchaeote	0	0	0	0	0	7	0	0	0	0	2	16	44	45	0	0	0	0	0	0	1	0
OTU_1071	Archaea	Euryarchaeota	Thermoplasmata	Marine Group II	uncultured archaeon	uncultured archaeon	uncultured archaeon	64	0	0	0	0	0	20	0	33	0	0	0	0	0	0	0	0	0	0	0	0	0
OTU_592	Archaea	Euryarchaeota	Thermoplasmata	Marine Group III	uncultured marine group II/III euryarchaeote KM3_133_A04	uncultured marine group II/III euryarchaeote KM3_133_A04	uncultured marine group II/III euryarchaeote KM3_133_A04	0	0	0	2	4	7	0	3	0	0	22	20	19	34	0	0	0	0	0	0	6	0
OTU_913	Archaea	Euryarchaeota	Thermoplasmata	Marine Group III	uncultured marine archaeon	uncultured marine archaeon	uncultured marine archaeon	0	0	10	0	0	0	0	11	0	0	6	0	0	0	0	0	0	0	0	2	88	0
OTU_500	Archaea	Thaumarchaeota	Nitrososphaeria	Nitrosopumilales	Nitrosopumilaceae	uncultured thaumarchaeote	uncultured thaumarchaeote	0	20	0	0	0	0	0	0	0	23	0	0	0	0	0	29	28	0	0	19	0	0
OTU_80	Archaea	Thaumarchaeota	Marine Benthic Group A	Unclassified	Unclassified	Unclassified	Unclassified	0	7	0	0	5	1	0	0	0	6	2	0	1	2	0	92	0	0	2	0	0	1
OTU_983	Archaea	Euryarchaeota	Thermoplasmata	Marine Group III	uncultured marine archaeon	uncultured marine archaeon	uncultured marine archaeon	68	4	3	0	0	0	22	2	11	3	1	0	0	0	0	0	0	0	0	0	7	0
OTU_195	Archaea	Thaumarchaeota	Nitrososphaeria	Nitrosopumilales	Nitrosopumilaceae	uncultured marine archaeon	uncultured marine archaeon	0	0	5	11	14	14	0	2	0	0	1	0	2	4	14	2	5	42	0	1	0	7
OTU_58	Archaea	Euryarchaeota	Methanobacteria	Methanobacteriales	Methanobacteriaceae	Methanobrevibacter	uncultured archaeon	0	0	0	2	0	0	0	0	0	0	0	0	0	0	0	0	12	0	0	68	42	0
OTU_202	Archaea	Euryarchaeota	Thermoplasmata	Marine Group II	uncultured marine group II/III euryarchaeote AD1000_31_C10	uncultured marine group II/III euryarchaeote AD1000_31_C10	uncultured marine group II/III euryarchaeote AD1000_31_C10	0	26	7	2	2	1	0	3	3	43	5	0	0	0	0	17	4	6	0	3	2	2
OTU_67	Archaea	Thaumarchaeota	Marine Benthic Group A	uncultured crenarchaeote	uncultured crenarchaeote	uncultured crenarchaeote	uncultured crenarchaeote	0	0	4	0	26	4	0	0	0	0	5	0	5	4	0	0	0	0	0	1	77	0
OTU_1107	Archaea	Thaumarchaeota	Nitrososphaeria	Nitrosopumilales	Nitrosopumilaceae	uncultured marine archaeon	uncultured marine archaeon	0	0	0	0	0	0	0	0	0	0	16	55	44	12	0	0	0	0	0	0	0	0
OTU_281	Archaea	Thaumarchaeota	Nitrososphaeria	Nitrosopumilales	Nitrosopumilaceae	Unclassified	Unclassified	0	31	26	2	0	3	0	10	0	30	9	0	2	0	0	7	1	0	0	9	0	0
OTU_391	Archaea	Thaumarchaeota	Nitrososphaeria	Nitrosopumilales	Nitrosopumilaceae	uncultured marine archaeon	uncultured marine archaeon	1	36	0	0	1	0	0	0	0	37	0	0	0	0	0	22	18	1	0	17	0	0
OTU_41	Archaea	Thaumarchaeota	Marine Benthic Group A	uncultured crenarchaeote	uncultured crenarchaeote	uncultured crenarchaeote	uncultured crenarchaeote	0	4	3	2	3	3	0	0	0	4	7	0	0	2	0	103	0	0	0	0	0	2
OTU_440	Archaea	Thaumarchaeota	Marine Benthic Group A	uncultured marine archaeon	uncultured marine archaeon	uncultured marine archaeon	uncultured marine archaeon	0	0	1	2	4	2	0	0	0	0	1	0	1	5	29	5	0	77	0	0	0	10
OTU_61	Archaea	Nanoarchaeaeota	Woesearchaeia	uncultured archaeon	uncultured archaeon	uncultured archaeon	uncultured archaeon	0	0	0	0	0	0	0	0	0	0	0	0	0	0	0	0	0	0	137	0	0	0
OTU_34	Archaea	Nanoarchaeaeota	Woesearchaeia	uncultured euryarchaeote	uncultured euryarchaeote	uncultured euryarchaeote	uncultured euryarchaeote	0	1	1	8	11	0	0	0	0	0	1	0	0	5	0	0	0	0	0	0	113	0
OTU_78	Archaea	Thaumarchaeota	Nitrososphaeria	Nitrosopumilales	Nitrosopumilaceae	Candidatus Nitrosopelagicus	uncultured archaeon	1	28	1	0	0	0	4	0	4	15	0	0	0	0	0	40	17	0	0	34	0	0
OTU_326	Archaea	Thaumarchaeota	Nitrososphaeria	Nitrosopumilales	Nitrosopumilaceae	uncultured marine archaeon	uncultured marine archaeon	0	10	22	20	7	9	0	4	0	7	9	5	1	1	4	4	12	12	0	13	0	6
OTU_368	Archaea	Thaumarchaeota	Nitrososphaeria	Nitrosopumilales	Nitrosopumilaceae	Unclassified	Unclassified	0	4	1	0	0	0	0	0	0	9	0	0	0	0	0	67	33	0	0	32	0	0
OTU_90	Archaea	Nanoarchaeaeota	Woesearchaeia	Unclassified	Unclassified	Unclassified	Unclassified	0	4	5	23	15	4	0	16	0	0	3	3	3	9	0	0	0	0	0	0	63	0
OTU_85	Archaea	Euryarchaeota	Thermoplasmata	Marine Group II	uncultured marine group II euryarchaeote	uncultured marine group II euryarchaeote	uncultured marine group II euryarchaeote	2	0	1	0	0	83	5	55	10	1	0	0	0	0	0	0	0	0	0	0	0	0
OTU_50	Archaea	Euryarchaeota	Thermoplasmata	Marine Group II	uncultured marine archaeon	uncultured marine archaeon	uncultured marine archaeon	51	1	2	2	1	2	22	12	50	0	1	0	1	0	0	0	0	12	0	0	1	1
OTU_227	Archaea	Thaumarchaeota	Nitrososphaeria	Nitrosopumilales	Nitrosopumilaceae	uncultured marine archaeon	uncultured marine archaeon	1	6	7	41	10	7	0	18	0	12	27	0	2	0	1	2	5	11	0	5	0	5
OTU_63	Archaea	Euryarchaeota	Thermoplasmata	Marine Group II	marine metagenome	marine metagenome	marine metagenome	76	0	1	0	0	1	13	20	39	10	0	0	0	0	0	0	0	0	0	0	0	0
OTU_634	Archaea	Euryarchaeota	Thermoplasmata	Marine Group III	uncultured marine archaeon	uncultured marine archaeon	uncultured marine archaeon	0	0	4	0	0	1	0	11	1	0	52	51	19	17	0	0	0	0	0	0	6	0
OTU_423	Archaea	Thaumarchaeota	Nitrososphaeria	Nitrosopumilales	Nitrosopumilaceae	uncultured marine archaeon	uncultured marine archaeon	0	0	0	0	0	0	0	0	0	0	60	81	20	8	0	0	0	0	0	0	0	0
OTU_54	Archaea	Euryarchaeota	Thermoplasmata	Marine Group II	hydrothermal vent metagenome	hydrothermal vent metagenome	hydrothermal vent metagenome	0	0	0	0	3	154	0	0	0	0	0	0	2	11	0	0	0	0	0	0	0	0
OTU_288	Archaea	Euryarchaeota	Thermoplasmata	Marine Group II	marine metagenome	marine metagenome	marine metagenome	68	0	0	0	1	0	77	4	17	0	0	0	0	0	0	0	0	0	0	0	4	0
OTU_59	Archaea	Nanoarchaeaeota	Woesearchaeia	uncultured archaeon	uncultured archaeon	uncultured archaeon	uncultured archaeon	0	0	0	12	18	12	0	0	0	0	0	1	13	15	0	0	0	0	0	0	0	102
OTU_429	Archaea	Euryarchaeota	Thermoplasmata	Marine Group III	uncultured marine group II/III euryarchaeote KM3_133_A04	uncultured marine group II/III euryarchaeote KM3_133_A04	uncultured marine group II/III euryarchaeote KM3_133_A04	0	0	0	1	4	3	0	0	0	0	15	18	52	77	0	0	0	0	0	0	4	0
OTU_214	Archaea	Thaumarchaeota	Nitrososphaeria	Nitrosopumilales	Nitrosopumilaceae	Unclassified	Unclassified	0	11	29	13	10	13	0	7	1	11	4	0	1	1	0	21	23	9	0	16	1	6
OTU_400	Archaea	Thaumarchaeota	Nitrososphaeria	Nitrosopumilales	Nitrosopumilaceae	Candidatus Nitrosopelagicus	uncultured archaeon	1	47	0	0	0	0	0	0	0	38	0	0	0	0	0	43	27	0	0	22	0	0
OTU_335	Archaea	Thaumarchaeota	Marine Benthic Group A	uncultured marine archaeon	uncultured marine archaeon	uncultured marine archaeon	uncultured marine archaeon	0	1	1	0	0	0	0	0	0	1	0	0	0	0	11	132	13	4	0	11	0	5
OTU_1098	Archaea	Thaumarchaeota	Nitrososphaeria	Nitrosopumilales	Nitrosopumilaceae	uncultured marine archaeon	uncultured marine archaeon	1	0	4	13	9	17	0	6	0	1	2	0	4	5	57	3	14	29	0	2	0	14
OTU_30	Archaea	Euryarchaeota	Thermoplasmata	Marine Group III	Marine Group III euryarchaeote SCGC AAA288-E19	Marine Group III euryarchaeote SCGC AAA288-E19	Marine Group III euryarchaeote SCGC AAA288-E19	0	28	11	3	0	0	0	104	2	19	14	0	0	1	0	0	0	0	0	0	0	0
OTU_60	Archaea	Euryarchaeota	Thermoplasmata	Marine Group III	uncultured marine group III euryarchaeote	uncultured marine group III euryarchaeote	uncultured marine group III euryarchaeote	2	26	12	17	5	3	0	20	0	11	17	2	0	1	0	0	0	0	0	0	69	0
OTU_769	Archaea	Thaumarchaeota	Nitrososphaeria	Nitrosopumilales	Nitrosopumilaceae	Unclassified	Unclassified	1	11	1	4	1	0	0	0	0	30	0	0	0	0	3	61	53	0	0	16	0	4
OTU_843	Archaea	Euryarchaeota	Thermoplasmata	Marine Group II	uncultured marine group II/III euryarchaeote AD1000_31_C10	uncultured marine group II/III euryarchaeote AD1000_31_C10	uncultured marine group II/III euryarchaeote AD1000_31_C10	0	0	0	0	0	0	0	0	0	0	123	39	15	8	0	0	0	0	0	0	0	0
OTU_902	Archaea	Euryarchaeota	Thermoplasmata	Marine Group II	uncultured archaeon	uncultured archaeon	uncultured archaeon	107	0	0	0	0	0	41	0	38	0	0	0	0	1	0	0	0	0	0	0	0	0
OTU_268	Archaea	Euryarchaeota	Thermoplasmata	Marine Group II	uncultured marine group II/III euryarchaeote AD1000_31_C10	uncultured marine group II/III euryarchaeote AD1000_31_C10	uncultured marine group II/III euryarchaeote AD1000_31_C10	3	5	14	10	4	2	0	3	0	11	4	0	0	1	0	5	3	86	0	3	12	25
OTU_523	Archaea	Euryarchaeota	Thermoplasmata	Marine Group II	uncultured marine group II/III euryarchaeote AD1000_108_D01	uncultured marine group II/III euryarchaeote AD1000_108_D01	uncultured marine group II/III euryarchaeote AD1000_108_D01	0	0	38	1	0	0	0	0	0	0	88	4	13	26	0	0	0	5	0	1	13	4
OTU_29	Archaea	Euryarchaeota	Thermoplasmata	Marine Group II	uncultured marine group II/III euryarchaeote KM3_53_G07	uncultured marine group II/III euryarchaeote KM3_53_G07	uncultured marine group II/III euryarchaeote KM3_53_G07	2	3	7	0	14	139	0	0	1	8	1	0	1	18	0	0	0	0	0	0	0	0
OTU_376	Archaea	Euryarchaeota	Thermoplasmata	Marine Group III	uncultured marine archaeon	uncultured marine archaeon	uncultured marine archaeon	0	0	0	14	5	17	0	94	0	1	33	10	4	15	0	0	0	0	0	0	1	0
OTU_461	Archaea	Thaumarchaeota	Nitrososphaeria	Nitrosopumilales	Nitrosopumilaceae	uncultured marine archaeon	uncultured marine archaeon	0	24	18	10	15	2	0	8	1	37	2	0	0	0	5	11	30	9	0	21	0	1
OTU_92	Archaea	Euryarchaeota	Thermoplasmata	Marine Group III	uncultured marine archaeon	uncultured marine archaeon	uncultured marine archaeon	0	0	0	1	0	0	0	4	0	0	74	59	36	20	0	0	0	0	0	0	1	0
OTU_1076	Archaea	Euryarchaeota	Thermoplasmata	Marine Group II	Marine group II euryarchaeote REDSEA-S03_B6	Marine group II euryarchaeote REDSEA-S03_B6	Marine group II euryarchaeote REDSEA-S03_B6	0	0	4	1	5	10	0	1	0	0	1	1	5	151	0	0	0	10	0	0	0	7
OTU_266	Archaea	Thaumarchaeota	Nitrososphaeria	Nitrosopumilales	Nitrosopumilaceae	Candidatus Nitrosopumilus	uncultured archaeon	0	5	0	0	5	9	0	38	10	6	0	0	0	2	13	33	6	0	67	0	5	1
OTU_685	Archaea	Thaumarchaeota	Nitrososphaeria	Nitrosopumilales	Nitrosopumilaceae	Unclassified	Unclassified	0	0	10	44	38	25	0	0	0	2	3	0	9	12	24	0	8	2	0	0	3	20
OTU_20	Archaea	Euryarchaeota	Thermoplasmata	Marine Group II	Unclassified	Unclassified	Unclassified	0	0	0	0	0	0	0	0	0	0	0	0	0	0	205	0	0	0	0	0	0	0
OTU_141	Archaea	Euryarchaeota	Thermoplasmata	Marine Group II	Unclassified	Unclassified	Unclassified	94	0	0	0	1	0	15	6	90	1	0	0	0	0	0	0	0	0	0	0	0	0
OTU_720	Archaea	Thaumarchaeota	Nitrososphaeria	Nitrosopumilales	Nitrosopumilaceae	uncultured marine archaeon	uncultured marine archaeon	0	0	2	51	73	40	0	6	0	0	6	0	34	2	0	0	0	0	0	0	0	0
OTU_136	Archaea	Euryarchaeota	Thermoplasmata	Marine Group III	Marine Group III euryarchaeote SCGC AAA288-E19	Marine Group III euryarchaeote SCGC AAA288-E19	Marine Group III euryarchaeote SCGC AAA288-E19	0	0	3	20	24	26	0	4	0	0	12	65	28	33	0	0	0	0	0	0	0	0
OTU_241	Archaea	Euryarchaeota	Thermoplasmata	Marine Group III	uncultured marine archaeon	uncultured marine archaeon	uncultured marine archaeon	0	0	0	0	0	1	0	1	0	0	34	74	24	90	0	0	0	0	0	0	1	0
OTU_1112	Archaea	Thaumarchaeota	Nitrososphaeria	Nitrosopumilales	Nitrosopumilaceae	Candidatus Nitrosopelagicus	marine metagenome	21	8	0	0	2	1	10	0	174	9	0	0	0	0	0	0	0	0	1	0	0	0
OTU_84	Archaea	Thaumarchaeota	Nitrososphaeria	Nitrosopumilales	Nitrosopumilaceae	uncultured thaumarchaeote	uncultured thaumarchaeote	0	32	1	1	2	0	0	1	0	13	0	0	0	0	0	110	30	1	0	35	0	0
OTU_697	Archaea	Thaumarchaeota	Nitrososphaeria	Nitrosopumilales	Nitrosopumilaceae	uncultured marine archaeon	uncultured marine archaeon	0	19	39	13	14	8	0	14	0	32	6	0	1	1	6	18	14	0	0	30	2	10
OTU_122	Archaea	Thaumarchaeota	Nitrososphaeria	Nitrosopumilales	Nitrosopumilaceae	Candidatus Nitrosopumilus	uncultured marine archaeon	0	2	1	0	16	108	0	29	0	0	1	0	4	21	17	10	0	13	4	0	3	1
OTU_1005	Archaea	Euryarchaeota	Thermoplasmata	Marine Group III	uncultured marine archaeon	uncultured marine archaeon	uncultured marine archaeon	0	1	16	8	12	32	0	141	0	2	9	0	3	1	0	0	0	0	0	0	16	0
OTU_40	Archaea	Euryarchaeota	Thermoplasmata	Marine Group II	uncultured archaeon	uncultured archaeon	uncultured archaeon	34	7	5	0	0	1	20	68	97	9	3	0	0	0	0	0	0	0	0	0	0	0
OTU_62	Archaea	Euryarchaeota	Halobacteria	Halobacteriales	Halomicrobiaceae	uncultured	marine metagenome	0	6	5	0	1	0	0	0	0	6	11	0	0	0	0	0	0	0	0	58	158	0
OTU_937	Archaea	Thaumarchaeota	Nitrososphaeria	Nitrosopumilales	Nitrosopumilaceae	Candidatus Nitrosopelagicus	uncultured archaeon	0	15	0	0	0	0	0	0	0	19	0	0	0	0	20	118	13	0	0	60	0	1
OTU_832	Archaea	Thaumarchaeota	Marine Benthic Group A	uncultured marine archaeon	uncultured marine archaeon	uncultured marine archaeon	uncultured marine archaeon	0	0	1	20	24	7	0	0	0	2	16	0	14	2	79	2	1	60	0	0	0	19
OTU_262	Archaea	Thaumarchaeota	Nitrososphaeria	Nitrosopumilales	Nitrosopumilaceae	uncultured marine crenarchaeote SAT1000-23-F7	uncultured marine crenarchaeote SAT1000-23-F7	1	45	15	16	9	10	0	9	1	38	11	0	1	2	15	21	23	0	0	27	0	12
OTU_47	Archaea	Euryarchaeota	Thermoplasmata	Marine Group II	uncultured marine group II euryarchaeote	uncultured marine group II euryarchaeote	uncultured marine group II euryarchaeote	0	0	9	14	63	115	0	0	0	0	1	0	20	39	0	0	0	0	0	0	0	0
OTU_129	Archaea	Thaumarchaeota	Nitrososphaeria	Nitrosopumilales	Nitrosopumilaceae	Candidatus Nitrosopelagicus	uncultured archaeon	0	43	0	0	0	0	0	0	2	26	0	0	0	0	5	49	47	0	0	88	0	2
OTU_137	Archaea	Thaumarchaeota	Nitrososphaeria	Nitrosopumilales	Nitrosopumilaceae	Unclassified	Unclassified	0	38	13	2	1	3	0	10	0	45	1	0	0	1	17	52	36	0	0	44	0	1
OTU_722	Archaea	Thaumarchaeota	Nitrososphaeria	Nitrosopumilales	Nitrosopumilaceae	uncultured thaumarchaeote	uncultured thaumarchaeote	1	47	55	5	2	1	4	21	2	53	11	0	0	0	0	21	8	0	0	34	1	0
OTU_339	Archaea	Thaumarchaeota	Nitrososphaeria	Nitrosopumilales	Nitrosopumilaceae	Unclassified	Unclassified	0	0	7	23	23	17	0	2	0	0	4	0	3	5	70	0	33	4	0	0	2	76
OTU_960	Archaea	Euryarchaeota	Thermoplasmata	Marine Group III	uncultured marine archaeon	uncultured marine archaeon	uncultured marine archaeon	2	87	9	0	0	0	0	80	6	91	1	0	0	0	0	0	0	0	0	0	0	0
OTU_31	Archaea	Euryarchaeota	Thermoplasmata	Marine Group II	uncultured archaeon	uncultured archaeon	uncultured archaeon	1	9	6	5	13	21	0	211	0	2	5	0	3	2	0	0	0	0	0	0	0	0
OTU_27	Archaea	Euryarchaeota	Thermoplasmata	Marine Group II	uncultured archaeon	uncultured archaeon	uncultured archaeon	0	35	3	0	12	140	0	31	0	30	2	0	0	2	0	0	0	0	0	0	24	0
OTU_65	Archaea	Thaumarchaeota	Marine Benthic Group A	uncultured marine archaeon	uncultured marine archaeon	uncultured marine archaeon	uncultured marine archaeon	0	1	3	1	0	2	0	0	0	0	14	48	29	28	53	13	5	67	0	1	0	15
OTU_44	Archaea	Euryarchaeota	Thermoplasmata	Marine Group II	Unclassified	Unclassified	Unclassified	1	2	1	0	0	0	0	261	0	12	4	0	0	1	0	0	0	0	0	0	0	0
OTU_98	Archaea	Thaumarchaeota	Nitrososphaeria	Nitrosopumilales	Nitrosopumilaceae	uncultured archaeon	uncultured archaeon	0	3	9	0	0	3	0	7	0	1	50	151	46	28	0	1	0	0	0	0	0	0
OTU_132	Archaea	Thaumarchaeota	Marine Benthic Group A	uncultured marine archaeon	uncultured marine archaeon	uncultured marine archaeon	uncultured marine archaeon	1	4	1	23	34	7	0	0	0	2	1	5	7	4	0	77	0	0	0	142	0	0
OTU_35	Archaea	Euryarchaeota	Thermoplasmata	Marine Group II	marine metagenome	marine metagenome	marine metagenome	118	0	0	0	0	2	94	0	98	0	0	0	0	0	0	0	0	0	0	0	0	0
OTU_159	Archaea	Thaumarchaeota	Nitrososphaeria	Nitrosopumilales	Nitrosopumilaceae	uncultured thaumarchaeote	uncultured thaumarchaeote	1	18	0	0	0	0	1	0	1	20	0	0	0	0	0	127	88	0	0	58	0	1
OTU_39	Archaea	Nanoarchaeaeota	Woesearchaeia	uncultured euryarchaeote	uncultured euryarchaeote	uncultured euryarchaeote	uncultured euryarchaeote	0	0	0	0	0	0	0	0	0	0	0	0	0	0	0	0	0	0	331	0	0	0
OTU_496	Archaea	Euryarchaeota	Thermoplasmata	Marine Group II	uncultured marine group II/III euryarchaeote AD1000_09_E08	uncultured marine group II/III euryarchaeote AD1000_09_E08	uncultured marine group II/III euryarchaeote AD1000_09_E08	166	0	0	0	0	1	56	8	101	4	0	0	0	0	0	0	0	0	0	0	0	0
OTU_106	Archaea	Euryarchaeota	Thermoplasmata	Marine Group II	Unclassified	Unclassified	Unclassified	0	3	2	24	75	71	0	0	0	0	16	39	32	73	0	0	0	6	0	0	0	1
OTU_301	Archaea	Euryarchaeota	Thermoplasmata	Marine Group II	uncultured marine group II/III euryarchaeote AD1000_31_C10	uncultured marine group II/III euryarchaeote AD1000_31_C10	uncultured marine group II/III euryarchaeote AD1000_31_C10	0	0	0	0	0	0	0	0	0	0	183	101	28	33	0	0	0	0	0	0	2	0
OTU_82	Archaea	Euryarchaeota	Thermoplasmata	Marine Group II	Unclassified	Unclassified	Unclassified	1	1	0	0	2	0	0	0	0	1	5	54	110	169	0	1	0	1	0	1	0	1
OTU_734	Archaea	Thaumarchaeota	Nitrososphaeria	Nitrosopumilales	Nitrosopumilaceae	Unclassified	Unclassified	3	23	1	1	0	0	0	0	0	19	1	0	0	0	0	117	103	1	0	83	0	1
OTU_191	Archaea	Thaumarchaeota	Nitrososphaeria	Nitrosopumilales	Nitrosopumilaceae	uncultured marine archaeon	uncultured marine archaeon	0	16	50	22	22	18	0	17	2	22	12	1	7	2	24	10	33	53	0	28	6	13
OTU_89	Archaea	Euryarchaeota	Thermoplasmata	Marine Group III	uncultured marine archaeon	uncultured marine archaeon	uncultured marine archaeon	0	0	1	8	28	12	0	10	0	0	28	69	77	137	0	0	0	0	0	0	0	0
OTU_924	Archaea	Thaumarchaeota	Nitrososphaeria	Nitrosopumilales	Nitrosopumilaceae	Candidatus Nitrosopelagicus	uncultured thaumarchaeote	21	8	0	0	2	4	33	0	170	2	0	0	0	0	0	16	25	2	88	4	0	0
OTU_86	Archaea	Euryarchaeota	Methanobacteria	Methanobacteriales	Methanobacteriaceae	Methanobrevibacter	uncultured methanogenic archaeon	0	0	0	2	0	0	0	0	0	0	0	0	2	0	0	0	0	392	0	0	0	0
OTU_36	Archaea	Thaumarchaeota	Nitrososphaeria	Nitrosopumilales	Nitrosopumilaceae	uncultured thaumarchaeote	uncultured thaumarchaeote	0	52	28	0	2	4	0	45	0	24	12	0	0	0	0	111	80	0	0	38	20	1
OTU_69	Archaea	Euryarchaeota	Thermoplasmata	Marine Group II	uncultured marine archaeon	uncultured marine archaeon	uncultured marine archaeon	140	0	0	0	5	3	28	26	168	8	0	0	0	1	0	0	0	0	0	0	52	0
OTU_28	Archaea	Thaumarchaeota	Nitrososphaeria	Nitrosopumilales	Nitrosopumilaceae	uncultured archaeon	uncultured archaeon	3	84	18	1	0	1	0	4	4	87	7	0	0	0	0	54	63	44	0	66	0	1
OTU_16	Archaea	Euryarchaeota	Thermoplasmata	Marine Group II	uncultured marine group II euryarchaeote	uncultured marine group II euryarchaeote	uncultured marine group II euryarchaeote	0	3	13	0	0	0	2	344	1	10	6	0	0	0	0	0	0	0	0	0	71	0
OTU_26	Archaea	Euryarchaeota	Thermoplasmata	Marine Group III	uncultured marine archaeon	uncultured marine archaeon	uncultured marine archaeon	3	135	7	0	0	0	2	205	8	88	9	0	0	0	0	0	0	0	0	0	0	0
OTU_45	Archaea	Crenarchaeota	Bathyarchaeia	uncultured archaeon	uncultured archaeon	uncultured archaeon	uncultured archaeon	0	0	0	0	0	0	0	0	0	0	0	0	0	0	0	0	0	478	0	0	0	0
OTU_87	Archaea	Euryarchaeota	Thermoplasmata	Marine Group II	uncultured archaeon	uncultured archaeon	uncultured archaeon	128	52	16	3	0	3	19	89	49	41	22	0	0	0	0	0	0	0	0	2	58	0
OTU_253	Archaea	Euryarchaeota	Thermoplasmata	Marine Group II	Unclassified	Unclassified	Unclassified	0	27	1	17	115	63	0	3	0	25	8	0	26	75	0	4	3	103	0	2	1	15
OTU_17	Archaea	Thaumarchaeota	Marine Benthic Group A	uncultured marine crenarchaeote KM3-153-F8	uncultured marine crenarchaeote KM3-153-F8	uncultured marine crenarchaeote KM3-153-F8	uncultured marine crenarchaeote KM3-153-F8	0	16	25	19	73	26	0	40	3	11	33	0	23	23	0	79	119	0	0	0	0	11
OTU_32	Archaea	Nanoarchaeaeota	Woesearchaeia	marine metagenome	marine metagenome	marine metagenome	marine metagenome	0	3	7	50	19	12	0	23	0	1	7	10	7	6	0	0	41	0	0	100	229	0
OTU_11	Archaea	Thaumarchaeota	Marine Benthic Group A	uncultured marine archaeon	uncultured marine archaeon	uncultured marine archaeon	uncultured marine archaeon	0	12	1	0	1	0	0	0	0	5	0	0	1	4	10	435	7	24	0	58	0	3
OTU_248	Archaea	Thaumarchaeota	Nitrososphaeria	Nitrosopumilales	Nitrosopumilaceae	Unclassified	Unclassified	0	0	0	0	1	0	0	0	0	0	49	316	108	93	0	0	0	0	0	0	0	1
OTU_683	Archaea	Thaumarchaeota	Marine Benthic Group A	uncultured marine archaeon	uncultured marine archaeon	uncultured marine archaeon	uncultured marine archaeon	0	10	28	5	11	0	0	2	0	13	16	14	4	9	244	105	25	54	0	1	0	39
OTU_37	Archaea	Euryarchaeota	Thermoplasmata	Marine Group II	uncultured marine eukaryote	uncultured marine eukaryote	uncultured marine eukaryote	1	3	11	6	28	43	0	338	0	0	18	0	9	25	0	0	0	0	0	0	102	0
OTU_754	Archaea	Euryarchaeota	Thermoplasmata	Marine Group II	Unclassified	Unclassified	Unclassified	0	3	3	98	249	156	0	0	2	9	4	0	59	5	0	2	0	10	0	1	0	3
OTU_18	Archaea	Euryarchaeota	Thermoplasmata	Marine Group II	uncultured marine group II euryarchaeote	uncultured marine group II euryarchaeote	uncultured marine group II euryarchaeote	0	0	21	19	50	94	0	58	0	0	28	8	18	20	0	0	0	0	0	6	296	0
OTU_649	Archaea	Euryarchaeota	Thermoplasmata	Marine Group II	uncultured marine group II/III euryarchaeote AD1000_31_C10	uncultured marine group II/III euryarchaeote AD1000_31_C10	uncultured marine group II/III euryarchaeote AD1000_31_C10	0	5	29	41	44	40	0	12	1	3	18	0	11	9	0	0	7	231	0	0	15	209
OTU_805	Archaea	Thaumarchaeota	Nitrososphaeria	Nitrosopumilales	Nitrosopumilaceae	uncultured thaumarchaeote	uncultured thaumarchaeote	6	24	1	1	0	0	3	0	1	8	0	0	0	0	4	296	93	18	0	254	0	2
OTU_569	Archaea	Euryarchaeota	Thermoplasmata	Marine Group II	uncultured marine group II/III euryarchaeote AD1000_108_D01	uncultured marine group II/III euryarchaeote AD1000_108_D01	uncultured marine group II/III euryarchaeote AD1000_108_D01	58	167	0	0	3	1	2	14	208	298	9	0	0	0	0	0	0	0	2	0	0	0
OTU_15	Archaea	Euryarchaeota	Methanomicrobia	Methanosarcinales	Methanosaetaceae	Methanosaeta	uncultured Methanosarcinales archaeon	0	0	0	0	0	0	0	0	0	0	0	0	0	0	316	2	107	1	293	0	83	0
OTU_68	Archaea	Thaumarchaeota	Nitrososphaeria	Nitrosopumilales	Nitrosopumilaceae	Candidatus Nitrosopelagicus	uncultured archaeon	3	125	0	1	0	0	1	0	3	84	0	0	0	0	3	286	101	0	0	195	0	0
OTU_868	Archaea	Euryarchaeota	Thermoplasmata	Marine Group III	uncultured archaeon	uncultured archaeon	uncultured archaeon	370	0	0	0	2	2	221	0	149	8	2	0	0	10	0	0	0	0	0	0	58	0
OTU_22	Archaea	Euryarchaeota	Methanomicrobia	Methanosarcinales	Methanosarcinaceae	Methanosarcina	uncultured Methanosarcina sp.	0	0	0	0	0	0	0	0	0	0	0	0	0	0	409	0	0	2	354	51	63	0
OTU_12	Archaea	Thaumarchaeota	Nitrososphaeria	Nitrosopumilales	Nitrosopumilaceae	uncultured archaeon	uncultured archaeon	2	76	20	1	1	1	0	0	1	76	7	0	0	0	0	166	178	0	0	371	0	0
OTU_795	Archaea	Euryarchaeota	Thermoplasmata	Marine Group II	Marine group II euryarchaeote REDSEA-S03_B6	Marine group II euryarchaeote REDSEA-S03_B6	Marine group II euryarchaeote REDSEA-S03_B6	163	85	0	2	3	11	172	1	357	20	0	0	0	1	0	0	114	1	0	0	1	2
OTU_312	Archaea	Thaumarchaeota	Nitrososphaeria	Nitrosopumilales	Nitrosopumilaceae	uncultured archaeon	uncultured archaeon	0	48	26	31	0	11	0	5	0	49	16	0	0	0	0	291	175	0	0	283	1	1
OTU_152	Archaea	Euryarchaeota	Thermoplasmata	Marine Group III	Marine Group III euryarchaeote SCGC AAA288-E19	Marine Group III euryarchaeote SCGC AAA288-E19	Marine Group III euryarchaeote SCGC AAA288-E19	0	24	87	68	72	80	0	385	1	19	61	9	18	47	0	0	0	0	0	1	108	0
OTU_818	Archaea	Thaumarchaeota	Nitrososphaeria	Nitrosopumilales	Nitrosopumilaceae	marine metagenome	marine metagenome	2	9	43	129	146	109	0	24	1	6	8	0	26	42	168	9	80	103	0	6	10	88
OTU_21	Archaea	Euryarchaeota	Thermoplasmata	Marine Group II	marine metagenome	marine metagenome	marine metagenome	381	0	2	0	13	0	331	40	194	2	0	0	0	0	0	0	0	0	0	0	65	0
OTU_3	Archaea	Euryarchaeota	Thermoplasmata	Marine Group II	seawater metagenome	seawater metagenome	seawater metagenome	19	4	3	62	249	420	18	12	49	7	9	0	96	18	0	0	5	52	0	0	8	24
OTU_24	Archaea	Euryarchaeota	Thermoplasmata	Marine Group II	Marine group II euryarchaeote REDSEA-S03_B6	Marine group II euryarchaeote REDSEA-S03_B6	Marine group II euryarchaeote REDSEA-S03_B6	3	0	3	13	51	106	1	7	2	0	8	104	161	391	0	0	0	25	0	0	28	241
OTU_52	Archaea	Euryarchaeota	Thermoplasmata	Marine Group III	uncultured marine group II/III euryarchaeote KM3_133_A04	uncultured marine group II/III euryarchaeote KM3_133_A04	uncultured marine group II/III euryarchaeote KM3_133_A04	1	0	26	45	154	157	0	101	1	0	102	80	147	317	0	0	0	0	0	2	62	0
OTU_931	Archaea	Thaumarchaeota	Nitrososphaeria	Nitrosopumilales	Nitrosopumilaceae	Unclassified	Unclassified	5	77	177	183	122	76	0	88	1	102	73	0	48	33	9	46	63	32	0	46	4	11
OTU_25	Archaea	Euryarchaeota	Thermoplasmata	Marine Group III	uncultured marine group II/III euryarchaeote KM3_133_A04	uncultured marine group II/III euryarchaeote KM3_133_A04	uncultured marine group II/III euryarchaeote KM3_133_A04	1	0	92	52	169	225	0	137	0	4	36	1	56	110	0	0	0	0	0	2	360	0
OTU_46	Archaea	Thaumarchaeota	Nitrososphaeria	Nitrosopumilales	Nitrosopumilaceae	uncultured marine archaeon	uncultured marine archaeon	4	156	143	48	24	30	1	139	2	212	95	42	15	3	2	164	181	0	0	131	1	2
OTU_6	Archaea	Nanoarchaeaeota	Woesearchaeia	uncultured euryarchaeote	uncultured euryarchaeote	uncultured euryarchaeote	uncultured euryarchaeote	60	0	0	0	0	0	20	0	1	0	0	0	0	0	0	0	0	14	1325	0	0	0
OTU_1099	Archaea	Thaumarchaeota	Nitrososphaeria	Nitrosopumilales	Nitrosopumilaceae	marine metagenome	marine metagenome	0	21	78	209	173	111	0	29	0	18	43	57	73	44	203	5	71	324	0	15	6	77
OTU_23	Archaea	Thaumarchaeota	Nitrososphaeria	Nitrosopumilales	Nitrosopumilaceae	uncultured thaumarchaeote	uncultured thaumarchaeote	1	52	154	98	51	38	1	134	2	90	213	313	122	64	5	37	105	0	0	51	10	19
OTU_243	Archaea	Euryarchaeota	Thermoplasmata	Marine Group III	uncultured marine archaeon	uncultured marine archaeon	uncultured marine archaeon	0	12	71	48	196	190	3	722	0	15	76	0	58	78	0	0	0	0	0	1	112	0
OTU_2	Archaea	Euryarchaeota	Thermoplasmata	Marine Group III	uncultured archaeon	uncultured archaeon	uncultured archaeon	741	12	2	1	3	2	481	10	278	20	2	0	1	0	0	0	0	0	0	0	77	0
OTU_121	Archaea	Thaumarchaeota	Nitrososphaeria	Nitrosopumilales	Nitrosopumilaceae	marine metagenome	marine metagenome	0	0	0	2	2	0	0	0	0	0	100	773	444	314	1	0	0	0	0	0	0	0
OTU_10	Archaea	Euryarchaeota	Thermoplasmata	Marine Group II	uncultured archaeon	uncultured archaeon	uncultured archaeon	868	8	13	0	0	1	489	51	304	10	8	0	0	0	0	0	0	0	0	0	2	0
OTU_13	Archaea	Thaumarchaeota	Nitrososphaeria	Nitrosopumilales	Nitrosopumilaceae	uncultured thaumarchaeote	uncultured thaumarchaeote	4	168	519	104	95	48	1	140	2	174	109	0	31	23	29	74	118	5	0	117	4	21
OTU_9	Archaea	Euryarchaeota	Thermoplasmata	Marine Group III	uncultured marine archaeon	uncultured marine archaeon	uncultured marine archaeon	8	76	155	41	85	110	24	804	16	85	120	7	41	32	0	0	0	0	0	2	191	0
OTU_133	Archaea	Euryarchaeota	Thermoplasmata	Marine Group II	uncultured marine group II/III euryarchaeote AD1000_31_C10	uncultured marine group II/III euryarchaeote AD1000_31_C10	uncultured marine group II/III euryarchaeote AD1000_31_C10	0	3	6	0	2	2	0	2	0	1	634	679	276	184	0	0	0	22	0	0	7	8
OTU_76	Archaea	Euryarchaeota	Thermoplasmata	Marine Group II	marine metagenome	marine metagenome	marine metagenome	694	43	1	0	2	8	280	67	666	21	1	0	1	0	0	0	0	0	94	0	0	0
OTU_382	Archaea	Euryarchaeota	Thermoplasmata	Marine Group II	Marine group II euryarchaeote REDSEA-S03_B6	Marine group II euryarchaeote REDSEA-S03_B6	Marine group II euryarchaeote REDSEA-S03_B6	340	114	12	35	137	174	300	97	253	100	8	0	32	67	0	0	73	65	0	0	15	93
OTU_102	Archaea	Euryarchaeota	Methanomicrobia	Methanosarcinales	Methanosaetaceae	Methanosaeta	uncultured euryarchaeote	0	0	0	0	0	0	0	0	0	0	0	0	0	0	7	0	5	125	1806	0	2	0
OTU_66	Archaea	Thaumarchaeota	Nitrososphaeria	Nitrosopumilales	Nitrosopumilaceae	uncultured marine crenarchaeote SAT1000-23-F7	uncultured marine crenarchaeote SAT1000-23-F7	5	65	172	186	191	80	0	58	1	95	112	368	162	93	102	27	101	4	0	30	10	126
OTU_234	Archaea	Thaumarchaeota	Nitrososphaeria	Nitrosopumilales	Nitrosopumilaceae	Unclassified	Unclassified	8	129	357	78	47	42	6	51	3	113	11	0	7	4	31	440	324	33	0	437	4	28
OTU_1013	Archaea	Euryarchaeota	Thermoplasmata	Marine Group III	uncultured marine archaeon	uncultured marine archaeon	uncultured marine archaeon	4	155	183	29	48	90	0	886	4	171	83	0	27	35	0	0	0	0	0	4	558	0
OTU_14	Archaea	Euryarchaeota	Thermoplasmata	Marine Group II	marine metagenome	marine metagenome	marine metagenome	1024	14	12	0	9	7	334	134	885	24	6	0	0	5	0	0	0	0	9	0	1	0
OTU_138	Archaea	Euryarchaeota	Thermoplasmata	Marine Group II	uncultured archaeon 'KTK 31A'	uncultured archaeon 'KTK 31A'	uncultured archaeon 'KTK 31A'	748	15	25	3	11	16	548	222	866	29	9	0	2	4	0	0	0	0	0	0	0	0
OTU_100	Archaea	Euryarchaeota	Thermoplasmata	Marine Group III	uncultured marine archaeon	uncultured marine archaeon	uncultured marine archaeon	464	114	195	32	38	46	274	852	126	87	113	0	14	31	0	0	0	0	0	1	145	0
OTU_675	Archaea	Thaumarchaeota	Nitrososphaeria	Nitrosopumilales	Nitrosopumilaceae	uncultured marine archaeon	uncultured marine archaeon	16	326	418	59	12	30	0	156	5	390	139	32	22	1	0	347	517	0	0	240	6	8
OTU_4	Archaea	Euryarchaeota	Thermoplasmata	Marine Group II	metagenome	metagenome	metagenome	462	0	3	0	1	6	313	98	444	9	0	0	0	2	0	69	1	47	1188	3	334	0
OTU_641	Archaea	Euryarchaeota	Thermoplasmata	Marine Group II	uncultured marine group II/III euryarchaeote AD1000_108_D01	uncultured marine group II/III euryarchaeote AD1000_108_D01	uncultured marine group II/III euryarchaeote AD1000_108_D01	56	711	47	16	43	50	37	36	169	828	39	16	5	63	0	242	21	431	301	429	79	147
OTU_5	Archaea	Thaumarchaeota	Nitrososphaeria	Nitrosopumilales	Nitrosopumilaceae	Unclassified	Unclassified	0	1	3	5	1	2	0	0	0	0	239	2246	1058	805	12	0	4	24	0	0	0	1
OTU_8	Archaea	Thaumarchaeota	Nitrososphaeria	Nitrosopumilales	Nitrosopumilaceae	Candidatus Nitrosopelagicus	Unclassified	81	43	1	2	1	15	1138	0	850	21	0	0	0	0	120	255	103	17	1739	110	0	3
OTU_19	Archaea	Thaumarchaeota	Nitrososphaeria	Nitrosopumilales	Nitrosopumilaceae	uncultured marine archaeon	uncultured marine archaeon	0	34	306	695	807	548	0	179	0	27	156	374	400	394	600	0	167	175	0	0	27	318
OTU_220	Archaea	Euryarchaeota	Thermoplasmata	Marine Group II	uncultured marine group II/III euryarchaeote AD1000_108_D01	uncultured marine group II/III euryarchaeote AD1000_108_D01	uncultured marine group II/III euryarchaeote AD1000_108_D01	54	811	109	67	99	82	56	65	66	733	20	3	8	49	1	688	120	927	114	499	710	850
OTU_1	Archaea	Euryarchaeota	Thermoplasmata	Marine Group II	uncultured marine group II/III euryarchaeote AD1000_31_C10	uncultured marine group II/III euryarchaeote AD1000_31_C10	uncultured marine group II/III euryarchaeote AD1000_31_C10	17	115	319	811	409	420	4	725	36	206	1031	1	151	39	0	36	42	1160	0	9	258	367
OTU_357	Archaea	Thaumarchaeota	Nitrososphaeria	Nitrosopumilales	Nitrosopumilaceae	uncultured marine archaeon	uncultured marine archaeon	0	22	154	533	628	371	0	66	0	20	62	3	187	139	2143	67	704	339	3	62	25	746
OTU_979	Archaea	Euryarchaeota	Thermoplasmata	Marine Group II	marine metagenome	marine metagenome	marine metagenome	2105	131	35	2	25	37	1076	217	2139	186	23	0	3	2	0	0	2	82	393	0	6	1
OTU_7	Archaea	Euryarchaeota	Thermoplasmata	Marine Group II	uncultured marine group II/III euryarchaeote AD1000_108_D01	uncultured marine group II/III euryarchaeote AD1000_108_D01	uncultured marine group II/III euryarchaeote AD1000_108_D01	273	1916	1160	211	152	154	113	345	177	1823	155	16	39	373	0	454	170	763	78	218	1645	1344
OTU_49	Archaea	Thaumarchaeota	Nitrososphaeria	Nitrosopumilales	Nitrosopumilaceae	uncultured marine archaeon	uncultured marine archaeon	15	387	1283	2982	2618	1577	3	564	8	415	488	37	877	527	2893	918	2571	726	3	1326	130	1521

## Sheet: Singletons of Archaeal OTUs
OTUId	Domain	Phylum	Class	Order	Family	Genus	Species	G3F50	G3F200	G3F1000	G3F2000	G3F3000	G3F4000	G3P50	G3P1000	J5F50	J5F200	J5F1000	J5F2000	J5F3000	J5F4000	J5P3000	G3P200	G3P2000	G3P4000	J5P50	J5P200	J5P1000	J5P2000	Singletons
OTU_1000	Archaea	Nanoarchaeaeota	Woesearchaeia	uncultured archaeon	uncultured archaeon	uncultured archaeon	uncultured archaeon	0	0	0	0	0	1	0	0	0	0	0	0	0	0	0	0	0	0	0	0	0	0	1
OTU_1002	Archaea	Euryarchaeota	Thermoplasmata	Marine Group III	uncultured marine archaeon	uncultured marine archaeon	uncultured marine archaeon	0	0	0	0	0	0	0	1	0	0	0	0	0	0	0	0	0	0	0	0	0	0	1
OTU_1008	Archaea	Euryarchaeota	Thermoplasmata	Marine Group II	uncultured marine group II/III euryarchaeote AD1000_09_E08	uncultured marine group II/III euryarchaeote AD1000_09_E08	uncultured marine group II/III euryarchaeote AD1000_09_E08	0	0	0	0	0	0	0	0	0	0	1	0	0	0	0	0	0	0	0	0	0	0	1
OTU_1009	Archaea	Euryarchaeota	Thermoplasmata	Marine Group II	uncultured marine group II euryarchaeote HF130_40G09	uncultured marine group II euryarchaeote HF130_40G09	uncultured marine group II euryarchaeote HF130_40G09	0	0	0	0	0	0	0	0	0	0	1	0	0	0	0	0	0	0	0	0	0	0	1
OTU_1011	Archaea	Thaumarchaeota	Nitrososphaeria	Nitrosopumilales	Nitrosopumilaceae	Unclassified	Unclassified	0	0	1	0	0	0	0	0	0	0	0	0	0	0	0	0	0	0	0	0	0	0	1
OTU_1012	Archaea	Nanoarchaeaeota	Woesearchaeia	uncultured euryarchaeote	uncultured euryarchaeote	uncultured euryarchaeote	uncultured euryarchaeote	0	0	0	1	0	0	0	0	0	0	0	0	0	0	0	0	0	0	0	0	0	0	1
OTU_1015	Archaea	Nanoarchaeaeota	Woesearchaeia	marine metagenome	marine metagenome	marine metagenome	marine metagenome	0	0	0	0	0	0	0	0	0	0	0	0	0	0	0	0	0	0	0	0	1	0	1
OTU_1017	Archaea	Nanoarchaeaeota	Woesearchaeia	uncultured archaeon	uncultured archaeon	uncultured archaeon	uncultured archaeon	0	0	0	0	0	1	0	0	0	0	0	0	0	0	0	0	0	0	0	0	0	0	1
OTU_1020	Archaea	Nanoarchaeaeota	Woesearchaeia	marine metagenome	marine metagenome	marine metagenome	marine metagenome	0	0	0	0	0	0	0	0	0	0	0	0	0	0	0	0	0	0	0	0	0	1	1
OTU_1021	Archaea	Thaumarchaeota	Nitrososphaeria	Nitrosopumilales	Nitrosopumilaceae	Candidatus Nitrosopelagicus	uncultured thaumarchaeote	1	0	0	0	0	0	0	0	0	0	0	0	0	0	0	0	0	0	0	0	0	0	1
OTU_1022	Archaea	Nanoarchaeaeota	Woesearchaeia	uncultured euryarchaeote	uncultured euryarchaeote	uncultured euryarchaeote	uncultured euryarchaeote	0	0	0	0	0	0	0	0	0	0	0	0	0	0	0	0	0	0	1	0	0	0	1
OTU_1025	Archaea	Thaumarchaeota	Nitrososphaeria	Nitrosopumilales	Nitrosopumilaceae	uncultured marine archaeon	uncultured marine archaeon	0	1	0	0	0	0	0	0	0	0	0	0	0	0	0	0	0	0	0	0	0	0	1
OTU_1027	Archaea	Euryarchaeota	Methanobacteria	Methanobacteriales	Methanobacteriaceae	Methanobrevibacter	uncultured euryarchaeote	0	0	0	0	0	0	0	0	0	0	0	0	0	0	0	0	0	0	0	1	0	0	1
OTU_1029	Archaea	Euryarchaeota	Methanomicrobia	Methanosarcinales	Methanosaetaceae	Methanosaeta	uncultured bacterium	0	0	0	0	0	0	0	0	0	0	0	0	0	0	0	0	0	0	1	0	0	0	1
OTU_1031	Archaea	Thaumarchaeota	Nitrososphaeria	Nitrosopumilales	Nitrosopumilaceae	marine metagenome	marine metagenome	0	0	0	0	0	0	0	0	0	0	0	1	0	0	0	0	0	0	0	0	0	0	1
OTU_1034	Archaea	Euryarchaeota	Methanomicrobia	Methanosarcinales	Methanosaetaceae	Methanosaeta	metagenome	0	0	0	0	0	0	0	0	0	0	0	0	0	0	0	0	1	0	0	0	0	0	1
OTU_1037	Archaea	Thaumarchaeota	Nitrososphaeria	Nitrosopumilales	Nitrosopumilaceae	uncultured marine archaeon	uncultured marine archaeon	0	0	0	0	0	0	0	0	0	0	0	0	0	0	0	0	0	0	0	1	0	0	1
OTU_1039	Archaea	Thaumarchaeota	Nitrososphaeria	Nitrosopumilales	Nitrosopumilaceae	Unclassified	Unclassified	0	0	0	0	0	0	0	0	0	0	0	1	0	0	0	0	0	0	0	0	0	0	1
OTU_1041	Archaea	Thaumarchaeota	Nitrososphaeria	Nitrosopumilales	Nitrosopumilaceae	Candidatus Nitrosopelagicus	marine metagenome	0	0	0	0	0	0	0	0	1	0	0	0	0	0	0	0	0	0	0	0	0	0	1
OTU_1043	Archaea	Nanoarchaeaeota	Nanohaloarchaeia	Deep Sea Euryarchaeotic Group(DSEG)	uncultured archaeon	uncultured archaeon	uncultured archaeon	0	0	0	0	0	1	0	0	0	0	0	0	0	0	0	0	0	0	0	0	0	0	1
OTU_1044	Archaea	Euryarchaeota	Thermoplasmata	Marine Group III	uncultured marine group II/III euryarchaeote KM3_133_A04	uncultured marine group II/III euryarchaeote KM3_133_A04	uncultured marine group II/III euryarchaeote KM3_133_A04	0	0	0	0	0	1	0	0	0	0	0	0	0	0	0	0	0	0	0	0	0	0	1
OTU_1045	Archaea	Nanoarchaeaeota	Woesearchaeia	Unclassified	Unclassified	Unclassified	Unclassified	0	0	0	0	0	1	0	0	0	0	0	0	0	0	0	0	0	0	0	0	0	0	1
OTU_1046	Archaea	Euryarchaeota	Thermoplasmata	Marine Group III	uncultured marine group II/III euryarchaeote KM3_133_A04	uncultured marine group II/III euryarchaeote KM3_133_A04	uncultured marine group II/III euryarchaeote KM3_133_A04	0	0	0	0	0	1	0	0	0	0	0	0	0	0	0	0	0	0	0	0	0	0	1
OTU_1048	Archaea	Thaumarchaeota	Nitrososphaeria	Nitrosopumilales	Nitrosopumilaceae	Unclassified	Unclassified	0	0	0	0	0	0	0	0	0	1	0	0	0	0	0	0	0	0	0	0	0	0	1
OTU_1049	Archaea	Euryarchaeota	Thermoplasmata	Marine Group II	uncultured marine group II euryarchaeote	uncultured marine group II euryarchaeote	uncultured marine group II euryarchaeote	0	0	0	0	0	0	0	1	0	0	0	0	0	0	0	0	0	0	0	0	0	0	1
OTU_1052	Archaea	Thaumarchaeota	Nitrososphaeria	Nitrosopumilales	Nitrosopumilaceae	marine metagenome	marine metagenome	0	0	0	0	0	0	0	0	0	0	0	0	0	0	0	0	0	0	0	0	0	1	1
OTU_1055	Archaea	Euryarchaeota	Thermoplasmata	Marine Group III	uncultured marine archaeon	uncultured marine archaeon	uncultured marine archaeon	0	0	0	0	0	0	0	1	0	0	0	0	0	0	0	0	0	0	0	0	0	0	1
OTU_1061	Archaea	Euryarchaeota	Thermoplasmata	Marine Group II	uncultured marine group II euryarchaeote HF130_40G09	uncultured marine group II euryarchaeote HF130_40G09	uncultured marine group II euryarchaeote HF130_40G09	1	0	0	0	0	0	0	0	0	0	0	0	0	0	0	0	0	0	0	0	0	0	1
OTU_1066	Archaea	Thaumarchaeota	Nitrososphaeria	Nitrosopumilales	Nitrosopumilaceae	marine metagenome	marine metagenome	0	0	0	0	0	0	0	0	0	0	0	0	0	0	0	0	1	0	0	0	0	0	1
OTU_1073	Archaea	Thaumarchaeota	Nitrososphaeria	Nitrosopumilales	Nitrosopumilaceae	uncultured marine archaeon	uncultured marine archaeon	0	0	0	0	0	0	0	0	0	1	0	0	0	0	0	0	0	0	0	0	0	0	1
OTU_1075	Archaea	Thaumarchaeota	Nitrososphaeria	Nitrosopumilales	Nitrosopumilaceae	uncultured thaumarchaeote	uncultured thaumarchaeote	0	0	0	0	0	0	0	0	0	0	0	0	0	0	0	0	1	0	0	0	0	0	1
OTU_1077	Archaea	Thaumarchaeota	Nitrososphaeria	Nitrosopumilales	Nitrosopumilaceae	marine metagenome	marine metagenome	0	0	0	0	0	0	0	0	0	0	0	0	1	0	0	0	0	0	0	0	0	0	1
OTU_1080	Archaea	Thaumarchaeota	Nitrososphaeria	Nitrosopumilales	Nitrosopumilaceae	uncultured marine crenarchaeote SAT1000-23-F7	uncultured marine crenarchaeote SAT1000-23-F7	0	0	0	0	0	0	0	0	0	0	0	0	0	0	1	0	0	0	0	0	0	0	1
OTU_1081	Archaea	Euryarchaeota	Methanomicrobia	Methanosarcinales	Methanosaetaceae	Methanosaeta	metagenome	0	0	0	0	0	0	0	0	0	0	0	0	0	0	1	0	0	0	0	0	0	0	1
OTU_1083	Archaea	Thaumarchaeota	Nitrososphaeria	Nitrosopumilales	Nitrosopumilaceae	Candidatus Nitrosopumilus	uncultured marine group I thaumarchaeote	0	0	1	0	0	0	0	0	0	0	0	0	0	0	0	0	0	0	0	0	0	0	1
OTU_1086	Archaea	Thaumarchaeota	Nitrososphaeria	Nitrosopumilales	Nitrosopumilaceae	marine metagenome	marine metagenome	0	0	0	0	0	0	0	0	0	0	1	0	0	0	0	0	0	0	0	0	0	0	1
OTU_1087	Archaea	Thaumarchaeota	Nitrososphaeria	Nitrosopumilales	Nitrosopumilaceae	Unclassified	Unclassified	0	0	0	0	0	0	0	0	0	0	0	0	0	0	0	0	1	0	0	0	0	0	1
OTU_1088	Archaea	Nanoarchaeaeota	Woesearchaeia	uncultured archaeon	uncultured archaeon	uncultured archaeon	uncultured archaeon	0	0	0	0	0	1	0	0	0	0	0	0	0	0	0	0	0	0	0	0	0	0	1
OTU_1091	Archaea	Nanoarchaeaeota	Woesearchaeia	uncultured archaeon	uncultured archaeon	uncultured archaeon	uncultured archaeon	0	0	0	0	0	1	0	0	0	0	0	0	0	0	0	0	0	0	0	0	0	0	1
OTU_1094	Archaea	Unclassified	Unclassified	Unclassified	Unclassified	Unclassified	Unclassified	0	0	0	0	0	0	0	0	0	0	0	0	1	0	0	0	0	0	0	0	0	0	1
OTU_1101	Archaea	Euryarchaeota	Thermoplasmata	Marine Group II	uncultured marine microorganism HF200_10-06-02	uncultured marine microorganism HF200_10-06-02	uncultured marine microorganism HF200_10-06-02	0	1	0	0	0	0	0	0	0	0	0	0	0	0	0	0	0	0	0	0	0	0	1
OTU_1102	Archaea	Thaumarchaeota	Nitrososphaeria	Nitrosopumilales	Nitrosopumilaceae	Unclassified	Unclassified	0	0	0	0	0	0	0	1	0	0	0	0	0	0	0	0	0	0	0	0	0	0	1
OTU_1105	Archaea	Euryarchaeota	Thermoplasmata	Marine Group III	uncultured marine archaeon	uncultured marine archaeon	uncultured marine archaeon	0	0	0	0	0	0	0	1	0	0	0	0	0	0	0	0	0	0	0	0	0	0	1
OTU_1106	Archaea	Thaumarchaeota	Marine Benthic Group A	uncultured marine crenarchaeote AD1000-325-A12	uncultured marine crenarchaeote AD1000-325-A12	uncultured marine crenarchaeote AD1000-325-A12	uncultured marine crenarchaeote AD1000-325-A12	0	0	0	0	0	0	0	0	0	0	0	0	0	0	0	0	0	0	0	1	0	0	1
OTU_1108	Archaea	Unclassified	Unclassified	Unclassified	Unclassified	Unclassified	Unclassified	0	0	0	0	0	0	0	0	0	0	0	0	1	0	0	0	0	0	0	0	0	0	1
OTU_1110	Archaea	Nanoarchaeaeota	Woesearchaeia	Unclassified	Unclassified	Unclassified	Unclassified	0	0	0	0	0	0	0	0	0	0	0	0	1	0	0	0	0	0	0	0	0	0	1
OTU_1114	Archaea	Thaumarchaeota	Nitrososphaeria	Nitrosopumilales	Nitrosopumilaceae	Unclassified	Unclassified	0	0	0	0	0	0	0	0	0	0	0	0	0	0	0	1	0	0	0	0	0	0	1
OTU_1120	Archaea	Thaumarchaeota	Nitrososphaeria	Nitrosopumilales	Nitrosopumilaceae	marine metagenome	marine metagenome	0	0	0	0	0	0	0	0	0	0	0	0	0	0	1	0	0	0	0	0	0	0	1
OTU_1123	Archaea	Thaumarchaeota	Nitrososphaeria	Nitrosopumilales	Nitrosopumilaceae	Unclassified	Unclassified	0	0	0	0	0	0	0	0	0	0	0	0	0	0	0	0	0	0	0	1	0	0	1
OTU_1127	Archaea	Thaumarchaeota	Marine Benthic Group A	uncultured marine crenarchaeote KM3-153-F8	uncultured marine crenarchaeote KM3-153-F8	uncultured marine crenarchaeote KM3-153-F8	uncultured marine crenarchaeote KM3-153-F8	0	0	1	0	0	0	0	0	0	0	0	0	0	0	0	0	0	0	0	0	0	0	1
OTU_1128	Archaea	Thaumarchaeota	Nitrososphaeria	Nitrosopumilales	Nitrosopumilaceae	Candidatus Nitrosopumilus	uncultured marine group I thaumarchaeote	0	0	1	0	0	0	0	0	0	0	0	0	0	0	0	0	0	0	0	0	0	0	1
OTU_1130	Archaea	Nanoarchaeaeota	Woesearchaeia	uncultured archaeon	uncultured archaeon	uncultured archaeon	uncultured archaeon	0	0	0	0	1	0	0	0	0	0	0	0	0	0	0	0	0	0	0	0	0	0	1
OTU_1132	Archaea	Euryarchaeota	Methanomicrobia	Methanosarcinales	Methanosaetaceae	Methanosaeta	Unclassified	0	0	0	0	0	0	0	0	0	0	0	0	0	0	0	0	0	0	1	0	0	0	1
OTU_1134	Archaea	Thaumarchaeota	Nitrososphaeria	Nitrosopumilales	Nitrosopumilaceae	Unclassified	Unclassified	0	0	1	0	0	0	0	0	0	0	0	0	0	0	0	0	0	0	0	0	0	0	1
OTU_1135	Archaea	Euryarchaeota	Thermoplasmata	Marine Group III	uncultured marine group II/III euryarchaeote KM3_133_A04	uncultured marine group II/III euryarchaeote KM3_133_A04	uncultured marine group II/III euryarchaeote KM3_133_A04	0	0	0	0	1	0	0	0	0	0	0	0	0	0	0	0	0	0	0	0	0	0	1
OTU_1137	Archaea	Thaumarchaeota	Nitrososphaeria	Nitrosopumilales	Nitrosopumilaceae	Candidatus Nitrosopelagicus	marine metagenome	0	0	0	0	0	0	0	0	1	0	0	0	0	0	0	0	0	0	0	0	0	0	1
OTU_174	Archaea	Thaumarchaeota	Marine Benthic Group A	Unclassified	Unclassified	Unclassified	Unclassified	0	0	0	0	0	0	0	0	0	1	0	0	0	0	0	0	0	0	0	0	0	0	1
OTU_178	Archaea	Euryarchaeota	Thermoplasmata	Marine Group III	uncultured marine archaeon	uncultured marine archaeon	uncultured marine archaeon	0	0	0	0	0	0	0	1	0	0	0	0	0	0	0	0	0	0	0	0	0	0	1
OTU_179	Archaea	Euryarchaeota	Methanomicrobia	Methanosarcinales	Methanosaetaceae	Methanosaeta	Unclassified	0	0	0	0	0	0	0	0	0	0	0	0	0	0	0	0	0	0	1	0	0	0	1
OTU_181	Archaea	Euryarchaeota	Thermoplasmata	Marine Group II	uncultured marine group II euryarchaeote HF130_28F07	uncultured marine group II euryarchaeote HF130_28F07	uncultured marine group II euryarchaeote HF130_28F07	0	0	0	0	0	0	0	0	0	1	0	0	0	0	0	0	0	0	0	0	0	0	1
OTU_197	Archaea	Euryarchaeota	Thermoplasmata	Marine Group II	uncultured marine group II/III euryarchaeote AD1000_09_E08	uncultured marine group II/III euryarchaeote AD1000_09_E08	uncultured marine group II/III euryarchaeote AD1000_09_E08	1	0	0	0	0	0	0	0	0	0	0	0	0	0	0	0	0	0	0	0	0	0	1
OTU_203	Archaea	Nanoarchaeaeota	Woesearchaeia	Unclassified	Unclassified	Unclassified	Unclassified	0	1	0	0	0	0	0	0	0	0	0	0	0	0	0	0	0	0	0	0	0	0	1
OTU_207	Archaea	Euryarchaeota	Thermoplasmata	Marine Group II	marine metagenome	marine metagenome	marine metagenome	0	0	0	0	0	0	1	0	0	0	0	0	0	0	0	0	0	0	0	0	0	0	1
OTU_208	Archaea	Thaumarchaeota	Nitrososphaeria	Nitrosopumilales	Nitrosopumilaceae	Candidatus Nitrosoarchaeum	uncultured archaeon	0	0	0	0	0	1	0	0	0	0	0	0	0	0	0	0	0	0	0	0	0	0	1
OTU_209	Archaea	Thaumarchaeota	Nitrososphaeria	Nitrosopumilales	Nitrosopumilaceae	Unclassified	Unclassified	0	0	0	0	0	0	0	0	0	0	0	0	0	0	0	0	0	0	0	0	0	1	1
OTU_217	Archaea	Euryarchaeota	Thermoplasmata	Marine Group II	uncultured marine group II/III euryarchaeote AD1000_31_C10	uncultured marine group II/III euryarchaeote AD1000_31_C10	uncultured marine group II/III euryarchaeote AD1000_31_C10	0	0	0	0	0	0	0	0	0	0	0	0	0	0	0	0	0	1	0	0	0	0	1
OTU_218	Archaea	Thaumarchaeota	Nitrososphaeria	Nitrosopumilales	Nitrosopumilaceae	Candidatus Nitrosopelagicus	marine metagenome	0	0	0	0	0	0	0	0	0	0	0	0	0	0	0	0	0	0	1	0	0	0	1
OTU_219	Archaea	Euryarchaeota	Methanomicrobia	Methanosarcinales	Methanosarcinaceae	Methanosarcina	uncultured Methanosarcina sp.	0	0	0	0	0	0	0	0	0	0	0	0	0	0	0	0	0	0	1	0	0	0	1
OTU_225	Archaea	Euryarchaeota	Thermoplasmata	Marine Group II	uncultured marine eukaryote	uncultured marine eukaryote	uncultured marine eukaryote	0	0	0	0	0	0	0	0	0	0	0	0	0	0	0	0	0	0	0	0	1	0	1
OTU_228	Archaea	Thaumarchaeota	Nitrososphaeria	Nitrosopumilales	Nitrosopumilaceae	uncultured marine archaeon	uncultured marine archaeon	0	0	1	0	0	0	0	0	0	0	0	0	0	0	0	0	0	0	0	0	0	0	1
OTU_231	Archaea	Thaumarchaeota	Nitrososphaeria	Nitrosopumilales	Nitrosopumilaceae	uncultured thaumarchaeote	uncultured thaumarchaeote	0	0	0	0	0	0	0	0	0	0	0	0	0	0	0	1	0	0	0	0	0	0	1
OTU_233	Archaea	Thaumarchaeota	Nitrososphaeria	Nitrosopumilales	Nitrosopumilaceae	Unclassified	Unclassified	0	0	0	0	0	0	0	0	0	0	0	0	0	0	0	1	0	0	0	0	0	0	1
OTU_235	Archaea	Nanoarchaeaeota	Woesearchaeia	uncultured euryarchaeote	uncultured euryarchaeote	uncultured euryarchaeote	uncultured euryarchaeote	0	0	0	0	0	0	0	0	0	1	0	0	0	0	0	0	0	0	0	0	0	0	1
OTU_249	Archaea	Thaumarchaeota	Nitrososphaeria	Nitrosopumilales	Nitrosopumilaceae	marine metagenome	marine metagenome	0	0	0	0	0	0	0	0	0	0	0	0	0	0	1	0	0	0	0	0	0	0	1
OTU_250	Archaea	Thaumarchaeota	Nitrososphaeria	Nitrosopumilales	Nitrosopumilaceae	Unclassified	Unclassified	0	0	0	0	0	0	0	0	0	0	0	0	0	0	1	0	0	0	0	0	0	0	1
OTU_252	Archaea	Nanoarchaeaeota	Woesearchaeia	uncultured euryarchaeote	uncultured euryarchaeote	uncultured euryarchaeote	uncultured euryarchaeote	0	0	0	0	0	0	0	0	0	0	0	0	0	1	0	0	0	0	0	0	0	0	1
OTU_259	Archaea	Euryarchaeota	Thermoplasmata	Marine Group II	Unclassified	Unclassified	Unclassified	0	0	0	0	0	0	0	0	0	1	0	0	0	0	0	0	0	0	0	0	0	0	1
OTU_275	Archaea	Euryarchaeota	Thermoplasmata	Marine Group II	uncultured marine eukaryote	uncultured marine eukaryote	uncultured marine eukaryote	0	0	0	0	0	0	0	1	0	0	0	0	0	0	0	0	0	0	0	0	0	0	1
OTU_278	Archaea	Euryarchaeota	Thermoplasmata	Marine Group III	uncultured marine archaeon	uncultured marine archaeon	uncultured marine archaeon	0	0	0	0	0	0	0	1	0	0	0	0	0	0	0	0	0	0	0	0	0	0	1
OTU_285	Archaea	Thaumarchaeota	Marine Benthic Group A	uncultured marine crenarchaeote AD1000-325-A12	uncultured marine crenarchaeote AD1000-325-A12	uncultured marine crenarchaeote AD1000-325-A12	uncultured marine crenarchaeote AD1000-325-A12	0	0	0	0	0	1	0	0	0	0	0	0	0	0	0	0	0	0	0	0	0	0	1
OTU_286	Archaea	Thaumarchaeota	Group 1.1c	uncultured marine group I thaumarchaeote	uncultured marine group I thaumarchaeote	uncultured marine group I thaumarchaeote	uncultured marine group I thaumarchaeote	0	0	0	0	1	0	0	0	0	0	0	0	0	0	0	0	0	0	0	0	0	0	1
OTU_290	Archaea	Thaumarchaeota	Nitrososphaeria	Nitrososphaerales	Nitrososphaeraceae	uncultured archaeon	uncultured archaeon	0	0	0	0	0	1	0	0	0	0	0	0	0	0	0	0	0	0	0	0	0	0	1
OTU_291	Archaea	Thaumarchaeota	Nitrososphaeria	Nitrosopumilales	Nitrosopumilaceae	marine metagenome	marine metagenome	0	0	0	0	1	0	0	0	0	0	0	0	0	0	0	0	0	0	0	0	0	0	1
OTU_294	Archaea	Euryarchaeota	Thermoplasmata	Marine Group II	metagenome	metagenome	metagenome	0	0	0	0	0	0	0	0	1	0	0	0	0	0	0	0	0	0	0	0	0	0	1
OTU_296	Archaea	Thaumarchaeota	Nitrososphaeria	Nitrosopumilales	Nitrosopumilaceae	Candidatus Nitrosopelagicus	marine metagenome	0	0	0	0	0	0	0	0	1	0	0	0	0	0	0	0	0	0	0	0	0	0	1
OTU_299	Archaea	Euryarchaeota	Thermoplasmata	Marine Group III	Unclassified	Unclassified	Unclassified	0	0	0	0	0	0	0	0	0	0	1	0	0	0	0	0	0	0	0	0	0	0	1
OTU_302	Archaea	Thaumarchaeota	Nitrososphaeria	Nitrosopumilales	Nitrosopumilaceae	marine metagenome	marine metagenome	0	0	0	0	0	0	0	0	0	0	0	1	0	0	0	0	0	0	0	0	0	0	1
OTU_304	Archaea	Thaumarchaeota	Nitrososphaeria	Nitrosopumilales	Nitrosopumilaceae	marine metagenome	marine metagenome	0	0	0	0	0	0	0	0	0	0	0	1	0	0	0	0	0	0	0	0	0	0	1
OTU_308	Archaea	Thaumarchaeota	Nitrososphaeria	Nitrosopumilales	Nitrosopumilaceae	Candidatus Nitrosopumilus	uncultured marine group I thaumarchaeote	0	0	0	0	0	0	0	0	0	0	0	0	0	0	0	1	0	0	0	0	0	0	1
OTU_309	Archaea	Thaumarchaeota	Nitrososphaeria	Nitrosopumilales	Nitrosopumilaceae	uncultured marine archaeon	uncultured marine archaeon	0	0	0	0	0	0	0	0	0	0	0	0	0	0	0	1	0	0	0	0	0	0	1
OTU_310	Archaea	Euryarchaeota	Thermoplasmata	Marine Group III	uncultured marine archaeon	uncultured marine archaeon	uncultured marine archaeon	0	0	0	0	0	0	0	0	0	0	0	0	0	1	0	0	0	0	0	0	0	0	1
OTU_317	Archaea	Thaumarchaeota	Nitrososphaeria	Nitrosopumilales	Nitrosopumilaceae	uncultured marine archaeon	uncultured marine archaeon	0	1	0	0	0	0	0	0	0	0	0	0	0	0	0	0	0	0	0	0	0	0	1
OTU_318	Archaea	Euryarchaeota	Thermoplasmata	Marine Group II	Unclassified	Unclassified	Unclassified	1	0	0	0	0	0	0	0	0	0	0	0	0	0	0	0	0	0	0	0	0	0	1
OTU_319	Archaea	Euryarchaeota	Thermoplasmata	Marine Group II	Unclassified	Unclassified	Unclassified	0	0	0	0	0	0	0	0	0	0	0	0	0	0	0	0	0	0	0	0	0	1	1
OTU_324	Archaea	Euryarchaeota	Thermoplasmata	Marine Group II	uncultured marine group II/III euryarchaeote AD1000_31_C10	uncultured marine group II/III euryarchaeote AD1000_31_C10	uncultured marine group II/III euryarchaeote AD1000_31_C10	0	0	0	0	0	0	0	1	0	0	0	0	0	0	0	0	0	0	0	0	0	0	1
OTU_328	Archaea	Euryarchaeota	Thermoplasmata	Marine Group III	uncultured marine archaeon	uncultured marine archaeon	uncultured marine archaeon	0	0	0	0	0	0	0	1	0	0	0	0	0	0	0	0	0	0	0	0	0	0	1
OTU_332	Archaea	Euryarchaeota	Thermoplasmata	Marine Group II	uncultured marine group II/III euryarchaeote AD1000_31_C10	uncultured marine group II/III euryarchaeote AD1000_31_C10	uncultured marine group II/III euryarchaeote AD1000_31_C10	0	0	0	0	0	0	0	1	0	0	0	0	0	0	0	0	0	0	0	0	0	0	1
OTU_333	Archaea	Nanoarchaeaeota	Woesearchaeia	uncultured euryarchaeote	uncultured euryarchaeote	uncultured euryarchaeote	uncultured euryarchaeote	0	0	0	0	0	1	0	0	0	0	0	0	0	0	0	0	0	0	0	0	0	0	1
OTU_337	Archaea	Thaumarchaeota	Nitrososphaeria	Nitrosopumilales	Nitrosopumilaceae	Unclassified	Unclassified	0	0	0	0	0	0	0	0	0	0	0	0	0	0	0	1	0	0	0	0	0	0	1
OTU_338	Archaea	Thaumarchaeota	Nitrososphaeria	Nitrosopumilales	Nitrosopumilaceae	Candidatus Nitrosopumilus	uncultured marine group I thaumarchaeote	0	0	1	0	0	0	0	0	0	0	0	0	0	0	0	0	0	0	0	0	0	0	1
OTU_340	Archaea	Thaumarchaeota	Nitrososphaeria	Nitrosopumilales	Nitrosopumilaceae	Unclassified	Unclassified	0	0	0	1	0	0	0	0	0	0	0	0	0	0	0	0	0	0	0	0	0	0	1
OTU_341	Archaea	Thaumarchaeota	Nitrososphaeria	Nitrosopumilales	Nitrosopumilaceae	Candidatus Nitrosopumilus	Unclassified	0	0	0	1	0	0	0	0	0	0	0	0	0	0	0	0	0	0	0	0	0	0	1
OTU_343	Archaea	Thaumarchaeota	Nitrososphaeria	Nitrosopumilales	Nitrosopumilaceae	uncultured marine archaeon	uncultured marine archaeon	0	0	1	0	0	0	0	0	0	0	0	0	0	0	0	0	0	0	0	0	0	0	1
OTU_344	Archaea	Thaumarchaeota	Nitrososphaeria	Nitrosopumilales	Nitrosopumilaceae	Unclassified	Unclassified	0	0	0	0	0	0	0	0	0	0	0	0	0	0	1	0	0	0	0	0	0	0	1
OTU_347	Archaea	Thaumarchaeota	Nitrososphaeria	Nitrosopumilales	Nitrosopumilaceae	marine metagenome	marine metagenome	0	0	0	0	0	0	0	0	0	0	0	0	0	0	0	0	0	1	0	0	0	0	1
OTU_352	Archaea	Euryarchaeota	Thermoplasmata	Marine Group III	uncultured marine group II/III euryarchaeote KM3_133_A04	uncultured marine group II/III euryarchaeote KM3_133_A04	uncultured marine group II/III euryarchaeote KM3_133_A04	0	0	0	0	0	0	0	0	0	0	0	0	0	1	0	0	0	0	0	0	0	0	1
OTU_354	Archaea	Nanoarchaeaeota	Woesearchaeia	Unclassified	Unclassified	Unclassified	Unclassified	0	0	0	0	0	0	0	0	0	0	0	0	0	1	0	0	0	0	0	0	0	0	1
OTU_356	Archaea	Thaumarchaeota	Marine Benthic Group A	uncultured marine crenarchaeote AD1000-325-A12	uncultured marine crenarchaeote AD1000-325-A12	uncultured marine crenarchaeote AD1000-325-A12	uncultured marine crenarchaeote AD1000-325-A12	0	0	0	0	0	0	0	0	0	0	0	0	0	0	0	1	0	0	0	0	0	0	1
OTU_358	Archaea	Thaumarchaeota	Nitrososphaeria	Nitrosopumilales	Nitrosopumilaceae	Unclassified	Unclassified	0	0	0	0	0	0	0	0	0	0	0	0	0	0	0	1	0	0	0	0	0	0	1
OTU_363	Archaea	Thaumarchaeota	Nitrososphaeria	Nitrosopumilales	Nitrosopumilaceae	uncultured marine crenarchaeote SAT1000-23-F7	uncultured marine crenarchaeote SAT1000-23-F7	0	0	0	0	0	0	0	0	0	0	0	0	0	0	1	0	0	0	0	0	0	0	1
OTU_366	Archaea	Thaumarchaeota	Nitrososphaeria	Nitrosopumilales	Nitrosopumilaceae	marine metagenome	marine metagenome	0	0	0	0	0	0	0	0	0	0	0	0	0	0	1	0	0	0	0	0	0	0	1
OTU_367	Archaea	Nanoarchaeaeota	Woesearchaeia	Unclassified	Unclassified	Unclassified	Unclassified	0	0	0	0	0	0	0	0	0	0	0	0	0	1	0	0	0	0	0	0	0	0	1
OTU_369	Archaea	Euryarchaeota	Thermoplasmata	Marine Group II	uncultured marine group II/III euryarchaeote AD1000_108_D01	uncultured marine group II/III euryarchaeote AD1000_108_D01	uncultured marine group II/III euryarchaeote AD1000_108_D01	0	0	0	0	0	0	0	0	0	0	0	0	0	0	0	0	0	0	0	1	0	0	1
OTU_372	Archaea	Nanoarchaeaeota	Woesearchaeia	uncultured euryarchaeote	uncultured euryarchaeote	uncultured euryarchaeote	uncultured euryarchaeote	0	0	0	0	0	0	0	0	0	0	0	0	0	0	0	0	0	0	1	0	0	0	1
OTU_374	Archaea	Thaumarchaeota	Nitrososphaeria	Nitrosopumilales	Nitrosopumilaceae	Unclassified	Unclassified	0	0	0	0	0	0	0	0	0	0	0	0	0	0	0	0	1	0	0	0	0	0	1
OTU_378	Archaea	Nanoarchaeaeota	Woesearchaeia	uncultured euryarchaeote	uncultured euryarchaeote	uncultured euryarchaeote	uncultured euryarchaeote	0	0	0	0	0	0	0	0	0	0	0	0	0	0	0	0	0	0	1	0	0	0	1
OTU_381	Archaea	Thaumarchaeota	Nitrososphaeria	Nitrosopumilales	Nitrosopumilaceae	Unclassified	Unclassified	0	0	0	0	0	0	0	0	0	1	0	0	0	0	0	0	0	0	0	0	0	0	1
OTU_384	Archaea	Thaumarchaeota	Nitrososphaeria	Nitrosopumilales	Nitrosopumilaceae	Unclassified	Unclassified	0	0	0	0	0	0	0	0	0	0	1	0	0	0	0	0	0	0	0	0	0	0	1
OTU_387	Archaea	Euryarchaeota	Thermoplasmata	Marine Group II	Marine group II euryarchaeote REDSEA-S19_B7N8	Marine group II euryarchaeote REDSEA-S19_B7N8	Marine group II euryarchaeote REDSEA-S19_B7N8	0	0	0	0	0	0	0	0	1	0	0	0	0	0	0	0	0	0	0	0	0	0	1
OTU_388	Archaea	Thaumarchaeota	Nitrososphaeria	Nitrosopumilales	Nitrosopumilaceae	Candidatus Nitrosopumilus	uncultured marine group I thaumarchaeote	0	0	0	0	0	0	0	0	0	0	1	0	0	0	0	0	0	0	0	0	0	0	1
OTU_389	Archaea	Thaumarchaeota	Nitrososphaeria	Nitrosopumilales	Nitrosopumilaceae	uncultured archaeon	uncultured archaeon	0	0	0	0	0	1	0	0	0	0	0	0	0	0	0	0	0	0	0	0	0	0	1
OTU_390	Archaea	Unclassified	Unclassified	Unclassified	Unclassified	Unclassified	Unclassified	0	0	0	0	0	1	0	0	0	0	0	0	0	0	0	0	0	0	0	0	0	0	1
OTU_393	Archaea	Euryarchaeota	Thermoplasmata	Marine Group II	Unclassified	Unclassified	Unclassified	0	0	0	0	0	0	0	0	0	0	1	0	0	0	0	0	0	0	0	0	0	0	1
OTU_396	Archaea	Euryarchaeota	Thermoplasmata	Marine Group II	uncultured marine group II euryarchaeote HF200_50D06	uncultured marine group II euryarchaeote HF200_50D06	uncultured marine group II euryarchaeote HF200_50D06	0	0	0	0	0	0	0	0	0	0	1	0	0	0	0	0	0	0	0	0	0	0	1
OTU_402	Archaea	Euryarchaeota	Thermoplasmata	Marine Group II	Marine group II euryarchaeote REDSEA-S03_B6	Marine group II euryarchaeote REDSEA-S03_B6	Marine group II euryarchaeote REDSEA-S03_B6	0	0	0	0	0	0	0	0	1	0	0	0	0	0	0	0	0	0	0	0	0	0	1
OTU_404	Archaea	Euryarchaeota	Thermoplasmata	Marine Group III	uncultured marine archaeon	uncultured marine archaeon	uncultured marine archaeon	0	0	0	0	0	0	0	0	0	1	0	0	0	0	0	0	0	0	0	0	0	0	1
OTU_409	Archaea	Thaumarchaeota	Marine Benthic Group A	uncultured crenarchaeote	uncultured crenarchaeote	uncultured crenarchaeote	uncultured crenarchaeote	0	0	0	0	0	0	0	0	0	0	0	0	0	1	0	0	0	0	0	0	0	0	1
OTU_410	Archaea	Thaumarchaeota	Marine Benthic Group A	uncultured marine archaeon	uncultured marine archaeon	uncultured marine archaeon	uncultured marine archaeon	0	0	0	0	0	0	0	0	0	0	0	0	0	0	0	1	0	0	0	0	0	0	1
OTU_411	Archaea	Euryarchaeota	Thermoplasmata	Marine Group II	marine metagenome	marine metagenome	marine metagenome	1	0	0	0	0	0	0	0	0	0	0	0	0	0	0	0	0	0	0	0	0	0	1
OTU_412	Archaea	Euryarchaeota	Thermoplasmata	Marine Group II	Unclassified	Unclassified	Unclassified	0	1	0	0	0	0	0	0	0	0	0	0	0	0	0	0	0	0	0	0	0	0	1
OTU_414	Archaea	Thaumarchaeota	Nitrososphaeria	Nitrosopumilales	Nitrosopumilaceae	Unclassified	Unclassified	0	0	1	0	0	0	0	0	0	0	0	0	0	0	0	0	0	0	0	0	0	0	1
OTU_426	Archaea	Euryarchaeota	Thermoplasmata	Marine Group III	Marine Group III euryarchaeote SCGC AAA288-E19	Marine Group III euryarchaeote SCGC AAA288-E19	Marine Group III euryarchaeote SCGC AAA288-E19	0	0	0	0	0	0	0	0	0	0	0	0	1	0	0	0	0	0	0	0	0	0	1
OTU_432	Archaea	Thaumarchaeota	Nitrososphaeria	Nitrosopumilales	Nitrosopumilaceae	marine metagenome	marine metagenome	0	0	0	0	0	0	0	0	0	0	0	0	0	0	0	0	0	1	0	0	0	0	1
OTU_442	Archaea	Euryarchaeota	Thermoplasmata	Marine Group III	marine metagenome	marine metagenome	marine metagenome	0	0	0	0	0	0	0	0	0	0	0	0	0	0	0	0	0	0	0	0	1	0	1
OTU_443	Archaea	Thaumarchaeota	Nitrososphaeria	Nitrosopumilales	Nitrosopumilaceae	Candidatus Nitrosopumilus	uncultured marine group I thaumarchaeote	0	0	0	0	0	0	0	0	0	1	0	0	0	0	0	0	0	0	0	0	0	0	1
OTU_447	Archaea	Euryarchaeota	Thermoplasmata	Marine Group II	Unclassified	Unclassified	Unclassified	0	0	0	0	0	0	0	0	1	0	0	0	0	0	0	0	0	0	0	0	0	0	1
OTU_448	Archaea	Euryarchaeota	Thermoplasmata	Marine Group II	Marine group II euryarchaeote REDSEA-S19_B7N8	Marine group II euryarchaeote REDSEA-S19_B7N8	Marine group II euryarchaeote REDSEA-S19_B7N8	0	0	0	0	0	0	0	0	1	0	0	0	0	0	0	0	0	0	0	0	0	0	1
OTU_450	Archaea	Euryarchaeota	Thermoplasmata	Marine Group II	Unclassified	Unclassified	Unclassified	0	0	0	0	0	0	0	0	0	1	0	0	0	0	0	0	0	0	0	0	0	0	1
OTU_453	Archaea	Euryarchaeota	Thermoplasmata	Marine Group II	metagenome	metagenome	metagenome	0	0	0	0	0	0	0	0	1	0	0	0	0	0	0	0	0	0	0	0	0	0	1
OTU_454	Archaea	Thaumarchaeota	Nitrososphaeria	Nitrosopumilales	Nitrosopumilaceae	uncultured marine archaeon	uncultured marine archaeon	0	0	0	0	0	0	0	0	0	1	0	0	0	0	0	0	0	0	0	0	0	0	1
OTU_455	Archaea	Euryarchaeota	Thermoplasmata	Marine Group II	uncultured marine group II euryarchaeote HF200_50D06	uncultured marine group II euryarchaeote HF200_50D06	uncultured marine group II euryarchaeote HF200_50D06	0	0	0	0	0	0	0	0	1	0	0	0	0	0	0	0	0	0	0	0	0	0	1
OTU_457	Archaea	Euryarchaeota	Thermoplasmata	Marine Group II	uncultured marine group II euryarchaeote HF130_40G09	uncultured marine group II euryarchaeote HF130_40G09	uncultured marine group II euryarchaeote HF130_40G09	0	0	0	0	0	0	0	0	1	0	0	0	0	0	0	0	0	0	0	0	0	0	1
OTU_459	Archaea	Thaumarchaeota	Nitrososphaeria	Nitrosopumilales	Nitrosopumilaceae	Candidatus Nitrosopelagicus	uncultured marine archaeon DCM871	0	0	0	0	0	0	0	0	0	0	0	0	0	0	0	1	0	0	0	0	0	0	1
OTU_462	Archaea	Thaumarchaeota	Nitrososphaeria	Nitrosopumilales	Nitrosopumilaceae	Unclassified	Unclassified	0	0	0	0	0	0	0	0	0	0	0	0	0	0	0	0	1	0	0	0	0	0	1
OTU_465	Archaea	Euryarchaeota	Thermoplasmata	Marine Group III	uncultured marine archaeon	uncultured marine archaeon	uncultured marine archaeon	0	0	0	0	0	0	0	1	0	0	0	0	0	0	0	0	0	0	0	0	0	0	1
OTU_468	Archaea	Euryarchaeota	Methanomicrobia	Methanosarcinales	Methanosaetaceae	Methanosaeta	Unclassified	0	0	0	0	0	0	0	0	0	0	0	0	0	0	0	0	0	0	1	0	0	0	1
OTU_471	Archaea	Thaumarchaeota	Nitrososphaeria	Nitrosopumilales	Nitrosopumilaceae	Candidatus Nitrosopumilus	uncultured thaumarchaeote	0	0	0	0	0	0	0	0	0	0	0	0	0	0	0	0	0	0	1	0	0	0	1
OTU_475	Archaea	Thaumarchaeota	Nitrososphaeria	Nitrosopumilales	Nitrosopumilaceae	marine metagenome	marine metagenome	0	0	0	0	0	1	0	0	0	0	0	0	0	0	0	0	0	0	0	0	0	0	1
OTU_478	Archaea	Thaumarchaeota	Nitrososphaeria	Nitrosopumilales	Nitrosopumilaceae	uncultured marine archaeon	uncultured marine archaeon	0	0	1	0	0	0	0	0	0	0	0	0	0	0	0	0	0	0	0	0	0	0	1
OTU_485	Archaea	Euryarchaeota	Methanobacteria	Methanobacteriales	Methanobacteriaceae	Methanobacterium	Methanobacterium curvum	0	0	0	0	0	0	0	0	0	0	0	0	0	1	0	0	0	0	0	0	0	0	1
OTU_488	Archaea	Euryarchaeota	Thermoplasmata	Marine Group II	Marine group II euryarchaeote REDSEA-S19_B7N8	Marine group II euryarchaeote REDSEA-S19_B7N8	Marine group II euryarchaeote REDSEA-S19_B7N8	1	0	0	0	0	0	0	0	0	0	0	0	0	0	0	0	0	0	0	0	0	0	1
OTU_489	Archaea	Thaumarchaeota	Nitrososphaeria	Nitrosopumilales	Nitrosopumilaceae	Unclassified	Unclassified	0	0	0	0	0	0	0	0	0	0	0	0	0	0	0	0	0	0	0	0	0	1	1
OTU_490	Archaea	Euryarchaeota	Thermoplasmata	Marine Group II	uncultured marine group II euryarchaeote HF130_40G09	uncultured marine group II euryarchaeote HF130_40G09	uncultured marine group II euryarchaeote HF130_40G09	0	1	0	0	0	0	0	0	0	0	0	0	0	0	0	0	0	0	0	0	0	0	1
OTU_492	Archaea	Thaumarchaeota	Nitrososphaeria	Nitrosopumilales	Nitrosopumilaceae	Unclassified	Unclassified	0	1	0	0	0	0	0	0	0	0	0	0	0	0	0	0	0	0	0	0	0	0	1
OTU_493	Archaea	Euryarchaeota	Thermoplasmata	Marine Group II	Unclassified	Unclassified	Unclassified	0	0	0	0	0	0	0	0	0	1	0	0	0	0	0	0	0	0	0	0	0	0	1
OTU_497	Archaea	Euryarchaeota	Thermoplasmata	Marine Group II	uncultured marine group II/III euryarchaeote AD1000_108_D01	uncultured marine group II/III euryarchaeote AD1000_108_D01	uncultured marine group II/III euryarchaeote AD1000_108_D01	0	0	0	0	0	0	0	0	0	1	0	0	0	0	0	0	0	0	0	0	0	0	1
OTU_507	Archaea	Euryarchaeota	Thermoplasmata	Marine Group II	uncultured marine group II euryarchaeote	uncultured marine group II euryarchaeote	uncultured marine group II euryarchaeote	0	0	0	0	0	0	0	0	0	0	0	0	1	0	0	0	0	0	0	0	0	0	1
OTU_509	Archaea	Thaumarchaeota	Nitrososphaeria	Nitrosopumilales	Nitrosopumilaceae	Candidatus Nitrosopelagicus	uncultured archaeon	0	0	0	0	0	0	0	0	0	0	0	0	0	0	0	1	0	0	0	0	0	0	1
OTU_511	Archaea	Euryarchaeota	Methanomicrobia	Methanosarcinales	Methanosaetaceae	Methanosaeta	Unclassified	0	0	0	0	0	0	0	0	0	0	0	0	0	0	0	0	0	0	1	0	0	0	1
OTU_524	Archaea	Thaumarchaeota	Nitrososphaeria	Nitrosopumilales	Nitrosopumilaceae	Unclassified	Unclassified	0	0	0	0	0	0	0	0	0	1	0	0	0	0	0	0	0	0	0	0	0	0	1
OTU_526	Archaea	Thaumarchaeota	Nitrososphaeria	Nitrosopumilales	Nitrosopumilaceae	Candidatus Nitrosopelagicus	marine metagenome	0	0	0	0	0	0	0	0	1	0	0	0	0	0	0	0	0	0	0	0	0	0	1
OTU_528	Archaea	Euryarchaeota	Thermoplasmata	Marine Group II	Unclassified	Unclassified	Unclassified	0	0	0	0	0	0	0	0	0	0	0	0	0	0	0	0	0	1	0	0	0	0	1
OTU_533	Archaea	Thaumarchaeota	Nitrososphaeria	Nitrosopumilales	Nitrosopumilaceae	marine metagenome	marine metagenome	0	0	0	0	0	0	0	0	0	0	0	0	0	0	0	0	0	0	0	0	0	1	1
OTU_534	Archaea	Thaumarchaeota	Nitrososphaeria	Nitrosopumilales	Nitrosopumilaceae	uncultured marine thaumarchaeote AD1000_66_F10	uncultured marine thaumarchaeote AD1000_66_F10	0	0	0	0	0	0	0	0	0	0	0	0	0	0	0	0	0	0	0	0	0	1	1
OTU_535	Archaea	Euryarchaeota	Thermoplasmata	Marine Group II	uncultured marine group II/III euryarchaeote AD1000_31_C10	uncultured marine group II/III euryarchaeote AD1000_31_C10	uncultured marine group II/III euryarchaeote AD1000_31_C10	0	0	0	0	0	0	0	0	0	0	0	0	0	0	0	0	0	0	0	0	1	0	1
OTU_537	Archaea	Thaumarchaeota	Nitrososphaeria	Nitrosopumilales	Nitrosopumilaceae	marine metagenome	marine metagenome	0	0	1	0	0	0	0	0	0	0	0	0	0	0	0	0	0	0	0	0	0	0	1
OTU_538	Archaea	Euryarchaeota	Methanomicrobia	Methanosarcinales	Methanosaetaceae	Methanosaeta	Unclassified	0	0	0	0	0	0	0	0	0	0	0	0	0	0	0	0	0	0	1	0	0	0	1
OTU_540	Archaea	Thaumarchaeota	Nitrososphaeria	Nitrosopumilales	Nitrosopumilaceae	Unclassified	Unclassified	0	1	0	0	0	0	0	0	0	0	0	0	0	0	0	0	0	0	0	0	0	0	1
OTU_541	Archaea	Euryarchaeota	Thermoplasmata	Marine Group II	Unclassified	Unclassified	Unclassified	0	0	0	0	0	0	0	0	0	1	0	0	0	0	0	0	0	0	0	0	0	0	1
OTU_543	Archaea	Thaumarchaeota	Nitrososphaeria	Nitrosopumilales	Nitrosopumilaceae	Candidatus Nitrosopumilus	Unclassified	0	0	0	0	0	0	0	0	0	0	1	0	0	0	0	0	0	0	0	0	0	0	1
OTU_546	Archaea	Nanoarchaeaeota	Woesearchaeia	Euryarchaeota archaeon SCGC AAA286-E23	Euryarchaeota archaeon SCGC AAA286-E23	Euryarchaeota archaeon SCGC AAA286-E23	Euryarchaeota archaeon SCGC AAA286-E23	0	0	0	0	0	0	0	0	0	0	0	1	0	0	0	0	0	0	0	0	0	0	1
OTU_548	Archaea	Thaumarchaeota	Marine Benthic Group A	uncultured marine crenarchaeote KM3-153-F8	uncultured marine crenarchaeote KM3-153-F8	uncultured marine crenarchaeote KM3-153-F8	uncultured marine crenarchaeote KM3-153-F8	0	0	0	0	1	0	0	0	0	0	0	0	0	0	0	0	0	0	0	0	0	0	1
OTU_550	Archaea	Euryarchaeota	Thermoplasmata	Marine Group III	marine metagenome	marine metagenome	marine metagenome	0	0	0	0	0	0	0	0	0	0	0	0	0	0	0	0	0	0	0	0	1	0	1
OTU_553	Archaea	Euryarchaeota	Thermoplasmata	Marine Group II	Unclassified	Unclassified	Unclassified	0	1	0	0	0	0	0	0	0	0	0	0	0	0	0	0	0	0	0	0	0	0	1
OTU_557	Archaea	Thaumarchaeota	Nitrososphaeria	Nitrosopumilales	Nitrosopumilaceae	Candidatus Nitrosopelagicus	Unclassified	0	0	0	0	0	0	0	0	0	0	0	0	0	0	0	0	0	0	0	1	0	0	1
OTU_563	Archaea	Thaumarchaeota	Nitrososphaeria	Nitrosopumilales	Nitrosopumilaceae	Unclassified	Unclassified	0	0	0	0	0	0	0	0	0	0	0	0	0	0	0	0	1	0	0	0	0	0	1
OTU_565	Archaea	Thaumarchaeota	Nitrososphaeria	Nitrosopumilales	Nitrosopumilaceae	Candidatus Nitrosopelagicus	marine metagenome	0	0	0	0	0	0	0	0	0	0	0	0	0	0	0	1	0	0	0	0	0	0	1
OTU_566	Archaea	Thaumarchaeota	Nitrososphaeria	Nitrosopumilales	Nitrosopumilaceae	uncultured marine archaeon	uncultured marine archaeon	0	0	0	0	0	0	0	0	0	0	0	0	0	0	0	1	0	0	0	0	0	0	1
OTU_571	Archaea	Thaumarchaeota	Nitrososphaeria	Nitrosopumilales	Nitrosopumilaceae	uncultured marine archaeon	uncultured marine archaeon	0	1	0	0	0	0	0	0	0	0	0	0	0	0	0	0	0	0	0	0	0	0	1
OTU_573	Archaea	Unclassified	Unclassified	Unclassified	Unclassified	Unclassified	Unclassified	0	0	0	0	0	0	0	0	0	0	0	0	0	0	1	0	0	0	0	0	0	0	1
OTU_574	Archaea	Thaumarchaeota	Nitrososphaeria	Nitrosopumilales	Nitrosopumilaceae	marine metagenome	marine metagenome	0	0	0	0	0	0	0	0	0	0	0	0	0	0	1	0	0	0	0	0	0	0	1
OTU_576	Archaea	Thaumarchaeota	Nitrososphaeria	Nitrosopumilales	Nitrosopumilaceae	Unclassified	Unclassified	0	0	0	0	0	0	0	0	0	0	0	0	0	0	0	0	1	0	0	0	0	0	1
OTU_581	Archaea	Euryarchaeota	Thermoplasmata	Marine Group II	uncultured marine group II/III euryarchaeote AD1000_108_D01	uncultured marine group II/III euryarchaeote AD1000_108_D01	uncultured marine group II/III euryarchaeote AD1000_108_D01	0	0	0	0	0	0	0	0	0	0	1	0	0	0	0	0	0	0	0	0	0	0	1
OTU_583	Archaea	Euryarchaeota	Thermoplasmata	Marine Group II	uncultured marine group II/III euryarchaeote AD1000_31_C10	uncultured marine group II/III euryarchaeote AD1000_31_C10	uncultured marine group II/III euryarchaeote AD1000_31_C10	0	0	0	0	0	0	0	0	0	0	1	0	0	0	0	0	0	0	0	0	0	0	1
OTU_584	Archaea	Thaumarchaeota	Marine Benthic Group A	uncultured crenarchaeote	uncultured crenarchaeote	uncultured crenarchaeote	uncultured crenarchaeote	0	0	0	0	0	0	0	0	0	0	0	0	1	0	0	0	0	0	0	0	0	0	1
OTU_587	Archaea	Euryarchaeota	Thermoplasmata	Marine Group II	metagenome	metagenome	metagenome	0	0	0	0	0	0	1	0	0	0	0	0	0	0	0	0	0	0	0	0	0	0	1
OTU_593	Archaea	Euryarchaeota	Halobacteria	Halobacteriales	Halococcaceae	Halohasta litchfieldiae	Halohasta litchfieldiae	0	0	0	0	0	0	0	0	0	0	0	0	0	1	0	0	0	0	0	0	0	0	1
OTU_594	Archaea	Thaumarchaeota	Nitrososphaeria	Nitrosopumilales	Nitrosopumilaceae	marine metagenome	marine metagenome	0	0	1	0	0	0	0	0	0	0	0	0	0	0	0	0	0	0	0	0	0	0	1
OTU_599	Archaea	Euryarchaeota	Thermoplasmata	Marine Group II	marine metagenome	marine metagenome	marine metagenome	0	0	0	0	0	0	1	0	0	0	0	0	0	0	0	0	0	0	0	0	0	0	1
OTU_601	Archaea	Euryarchaeota	Methanomicrobia	Methanosarcinales	Methanosaetaceae	Methanosaeta	Unclassified	0	0	0	0	0	0	0	0	0	0	0	0	0	0	0	0	0	0	1	0	0	0	1
OTU_602	Archaea	Thaumarchaeota	Nitrososphaeria	Nitrosopumilales	Nitrosopumilaceae	Unclassified	Unclassified	0	0	0	0	0	0	0	0	0	0	0	0	0	0	0	0	0	0	0	1	0	0	1
OTU_603	Archaea	Euryarchaeota	Thermoplasmata	Marine Group II	uncultured marine group II/III euryarchaeote AD1000_108_D01	uncultured marine group II/III euryarchaeote AD1000_108_D01	uncultured marine group II/III euryarchaeote AD1000_108_D01	0	0	0	0	0	0	0	0	0	1	0	0	0	0	0	0	0	0	0	0	0	0	1
OTU_609	Archaea	Thaumarchaeota	Nitrososphaeria	Nitrosopumilales	Nitrosopumilaceae	Unclassified	Unclassified	0	0	0	0	0	0	0	0	0	0	0	0	0	0	0	1	0	0	0	0	0	0	1
OTU_614	Archaea	Thaumarchaeota	Nitrososphaeria	Nitrosopumilales	Nitrosopumilaceae	Unclassified	Unclassified	0	0	0	0	0	0	0	0	0	0	0	0	0	0	0	0	0	0	0	0	0	1	1
OTU_615	Archaea	Thaumarchaeota	Nitrososphaeria	Nitrosopumilales	Nitrosopumilaceae	marine metagenome	marine metagenome	0	0	0	0	1	0	0	0	0	0	0	0	0	0	0	0	0	0	0	0	0	0	1
OTU_617	Archaea	Thaumarchaeota	Nitrososphaeria	Nitrosopumilales	Nitrosopumilaceae	uncultured marine archaeon	uncultured marine archaeon	0	0	0	1	0	0	0	0	0	0	0	0	0	0	0	0	0	0	0	0	0	0	1
OTU_618	Archaea	Euryarchaeota	Thermoplasmata	Marine Group III	uncultured marine archaeon	uncultured marine archaeon	uncultured marine archaeon	0	0	1	0	0	0	0	0	0	0	0	0	0	0	0	0	0	0	0	0	0	0	1
OTU_619	Archaea	Thaumarchaeota	Nitrososphaeria	Nitrosopumilales	Nitrosopumilaceae	uncultured marine archaeon	uncultured marine archaeon	0	0	1	0	0	0	0	0	0	0	0	0	0	0	0	0	0	0	0	0	0	0	1
OTU_621	Archaea	Euryarchaeota	Thermoplasmata	Marine Group II	Unclassified	Unclassified	Unclassified	0	0	0	0	0	0	0	1	0	0	0	0	0	0	0	0	0	0	0	0	0	0	1
OTU_622	Archaea	Thaumarchaeota	Nitrososphaeria	Nitrosopumilales	Nitrosopumilaceae	marine metagenome	marine metagenome	0	0	0	0	0	0	0	0	0	0	0	0	0	1	0	0	0	0	0	0	0	0	1
OTU_624	Archaea	Euryarchaeota	Thermoplasmata	Marine Group II	uncultured archaeon 'KTK 31A'	uncultured archaeon 'KTK 31A'	uncultured archaeon 'KTK 31A'	0	0	0	0	0	0	0	1	0	0	0	0	0	0	0	0	0	0	0	0	0	0	1
OTU_626	Archaea	Euryarchaeota	Thermococci	Methanofastidiosales	uncultured	marine metagenome	marine metagenome	0	0	0	0	0	0	0	0	0	0	0	0	1	0	0	0	0	0	0	0	0	0	1
OTU_627	Archaea	Thaumarchaeota	Nitrososphaeria	Nitrosopumilales	Nitrosopumilaceae	Unclassified	Unclassified	0	0	0	0	0	0	0	0	0	0	0	0	0	0	0	1	0	0	0	0	0	0	1
OTU_630	Archaea	Euryarchaeota	Thermoplasmata	Marine Group III	metagenome	metagenome	metagenome	1	0	0	0	0	0	0	0	0	0	0	0	0	0	0	0	0	0	0	0	0	0	1
OTU_632	Archaea	Euryarchaeota	Thermoplasmata	Marine Group II	uncultured marine eukaryote	uncultured marine eukaryote	uncultured marine eukaryote	0	1	0	0	0	0	0	0	0	0	0	0	0	0	0	0	0	0	0	0	0	0	1
OTU_635	Archaea	Euryarchaeota	Thermoplasmata	Marine Group II	metagenome	metagenome	metagenome	0	0	0	0	0	0	0	1	0	0	0	0	0	0	0	0	0	0	0	0	0	0	1
OTU_637	Archaea	Thaumarchaeota	Nitrososphaeria	Nitrosopumilales	Nitrosopumilaceae	Candidatus Nitrosopelagicus	uncultured thaumarchaeote	0	0	0	0	0	0	0	0	0	0	0	0	0	0	0	1	0	0	0	0	0	0	1
OTU_638	Archaea	Thaumarchaeota	Nitrososphaeria	Nitrosopumilales	Nitrosopumilaceae	Candidatus Nitrosopelagicus	uncultured archaeon	0	0	0	0	0	0	0	0	0	0	0	0	0	0	0	0	0	0	0	1	0	0	1
OTU_646	Archaea	Thaumarchaeota	Nitrososphaeria	Nitrosopumilales	Nitrosopumilaceae	Unclassified	Unclassified	0	0	0	0	0	0	0	0	0	0	0	0	0	0	1	0	0	0	0	0	0	0	1
OTU_648	Archaea	Thaumarchaeota	Nitrososphaeria	Nitrosopumilales	Nitrosopumilaceae	marine metagenome	marine metagenome	0	0	0	1	0	0	0	0	0	0	0	0	0	0	0	0	0	0	0	0	0	0	1
OTU_651	Archaea	Thaumarchaeota	Nitrososphaeria	Nitrosopumilales	Nitrosopumilaceae	marine metagenome	marine metagenome	0	0	0	0	0	0	0	0	0	0	0	0	0	0	1	0	0	0	0	0	0	0	1
OTU_654	Archaea	Nanoarchaeaeota	Woesearchaeia	uncultured euryarchaeote	uncultured euryarchaeote	uncultured euryarchaeote	uncultured euryarchaeote	0	0	0	1	0	0	0	0	0	0	0	0	0	0	0	0	0	0	0	0	0	0	1
OTU_656	Archaea	Thaumarchaeota	Nitrososphaeria	Nitrosopumilales	Nitrosopumilaceae	Unclassified	Unclassified	0	0	0	0	0	0	0	0	0	0	1	0	0	0	0	0	0	0	0	0	0	0	1
OTU_661	Archaea	Thaumarchaeota	Nitrososphaeria	Nitrosopumilales	Nitrosopumilaceae	Unclassified	Unclassified	0	0	0	0	0	0	0	0	0	0	0	0	0	0	1	0	0	0	0	0	0	0	1
OTU_663	Archaea	Nanoarchaeaeota	Woesearchaeia	Unclassified	Unclassified	Unclassified	Unclassified	0	0	0	0	0	0	0	0	0	0	0	0	0	0	0	0	0	0	0	0	1	0	1
OTU_666	Archaea	Nanoarchaeaeota	Woesearchaeia	marine metagenome	marine metagenome	marine metagenome	marine metagenome	0	0	0	0	0	0	0	0	0	0	0	0	0	0	0	0	0	0	0	0	1	0	1
OTU_669	Archaea	Thaumarchaeota	Nitrososphaeria	Nitrosopumilales	Nitrosopumilaceae	Candidatus Nitrosopelagicus	Unclassified	0	0	0	0	0	0	0	0	0	0	0	0	0	0	0	0	0	0	1	0	0	0	1
OTU_670	Archaea	Thaumarchaeota	Nitrososphaeria	Nitrosopumilales	Nitrosopumilaceae	Unclassified	Unclassified	0	0	0	0	0	0	0	0	0	0	0	0	0	0	0	0	0	0	0	1	0	0	1
OTU_672	Archaea	Thaumarchaeota	Nitrososphaeria	Nitrosopumilales	Nitrosopumilaceae	Candidatus Nitrosopelagicus	marine metagenome	0	0	0	0	0	0	0	0	0	0	0	0	0	0	0	0	0	0	1	0	0	0	1
OTU_676	Archaea	Euryarchaeota	Thermoplasmata	Marine Group II	uncultured marine group II euryarchaeote HF130_40G09	uncultured marine group II euryarchaeote HF130_40G09	uncultured marine group II euryarchaeote HF130_40G09	0	0	0	0	0	0	0	0	0	1	0	0	0	0	0	0	0	0	0	0	0	0	1
OTU_678	Archaea	Euryarchaeota	Thermoplasmata	Marine Group II	marine metagenome	marine metagenome	marine metagenome	1	0	0	0	0	0	0	0	0	0	0	0	0	0	0	0	0	0	0	0	0	0	1
OTU_684	Archaea	Euryarchaeota	Thermoplasmata	Marine Group II	uncultured marine group II/III euryarchaeote AD1000_31_C10	uncultured marine group II/III euryarchaeote AD1000_31_C10	uncultured marine group II/III euryarchaeote AD1000_31_C10	0	0	0	0	0	0	0	0	0	0	0	0	0	0	0	0	0	0	0	0	0	1	1
OTU_690	Archaea	Euryarchaeota	Thermoplasmata	Marine Group II	uncultured marine group II euryarchaeote	uncultured marine group II euryarchaeote	uncultured marine group II euryarchaeote	0	0	0	0	0	0	0	0	0	0	0	0	1	0	0	0	0	0	0	0	0	0	1
OTU_692	Archaea	Nanoarchaeaeota	Woesearchaeia	uncultured archaeon	uncultured archaeon	uncultured archaeon	uncultured archaeon	0	0	0	0	0	1	0	0	0	0	0	0	0	0	0	0	0	0	0	0	0	0	1
OTU_693	Archaea	Thaumarchaeota	Nitrososphaeria	Nitrosopumilales	Nitrosopumilaceae	marine metagenome	marine metagenome	0	0	0	0	0	1	0	0	0	0	0	0	0	0	0	0	0	0	0	0	0	0	1
OTU_695	Archaea	Thaumarchaeota	Nitrososphaeria	Nitrosopumilales	Nitrosopumilaceae	uncultured archaeon	uncultured archaeon	0	0	0	0	0	0	0	0	0	0	0	0	0	0	0	0	0	0	0	0	1	0	1
OTU_696	Archaea	Thaumarchaeota	Nitrososphaeria	Nitrosopumilales	Nitrosopumilaceae	uncultured marine archaeon	uncultured marine archaeon	0	0	0	0	0	0	0	0	0	1	0	0	0	0	0	0	0	0	0	0	0	0	1
OTU_700	Archaea	Euryarchaeota	Thermoplasmata	Marine Group II	Unclassified	Unclassified	Unclassified	0	0	0	0	0	0	0	0	1	0	0	0	0	0	0	0	0	0	0	0	0	0	1
OTU_702	Archaea	Euryarchaeota	Thermoplasmata	Marine Group III	uncultured marine group III euryarchaeote	uncultured marine group III euryarchaeote	uncultured marine group III euryarchaeote	0	0	0	0	0	0	0	0	0	0	1	0	0	0	0	0	0	0	0	0	0	0	1
OTU_704	Archaea	Euryarchaeota	Thermoplasmata	Marine Group II	metagenome	metagenome	metagenome	0	0	0	0	0	0	0	1	0	0	0	0	0	0	0	0	0	0	0	0	0	0	1
OTU_706	Archaea	Thaumarchaeota	Marine Benthic Group A	uncultured thaumarchaeote	uncultured thaumarchaeote	uncultured thaumarchaeote	uncultured thaumarchaeote	0	0	0	0	0	0	0	0	0	0	0	0	0	1	0	0	0	0	0	0	0	0	1
OTU_709	Archaea	Thaumarchaeota	Nitrososphaeria	Nitrosopumilales	Nitrosopumilaceae	Unclassified	Unclassified	0	0	0	0	0	0	0	0	0	0	0	0	0	0	0	0	0	0	0	1	0	0	1
OTU_710	Archaea	Thaumarchaeota	Nitrososphaeria	Nitrosopumilales	Nitrosopumilaceae	Candidatus Nitrosopumilus	uncultured marine group I thaumarchaeote	0	0	0	0	0	0	0	0	0	0	0	0	0	0	0	0	1	0	0	0	0	0	1
OTU_711	Archaea	Unclassified	Unclassified	Unclassified	Unclassified	Unclassified	Unclassified	0	0	0	0	0	0	0	0	0	0	0	0	0	0	0	0	1	0	0	0	0	0	1
OTU_723	Archaea	Thaumarchaeota	Nitrososphaeria	Nitrosopumilales	Nitrosopumilaceae	Candidatus Nitrosopelagicus	uncultured marine archaeon DCM871	0	0	0	0	0	0	0	0	0	0	0	0	0	0	0	1	0	0	0	0	0	0	1
OTU_725	Archaea	Thaumarchaeota	Nitrososphaeria	Nitrosopumilales	Nitrosopumilaceae	Candidatus Nitrosopelagicus	marine metagenome	0	0	0	0	0	0	0	0	0	0	0	0	0	0	0	0	0	0	1	0	0	0	1
OTU_726	Archaea	Nanoarchaeaeota	Woesearchaeia	uncultured euryarchaeote	uncultured euryarchaeote	uncultured euryarchaeote	uncultured euryarchaeote	0	0	0	0	0	0	0	0	0	0	0	0	0	0	0	0	0	0	1	0	0	0	1
OTU_731	Archaea	Thaumarchaeota	Nitrososphaeria	Nitrosopumilales	Nitrosopumilaceae	Unclassified	Unclassified	0	0	0	0	0	0	0	0	0	0	0	0	0	0	0	0	0	0	0	1	0	0	1
OTU_732	Archaea	Thaumarchaeota	Nitrososphaeria	Nitrosopumilales	Nitrosopumilaceae	uncultured marine crenarchaeote SAT1000-23-F7	uncultured marine crenarchaeote SAT1000-23-F7	0	1	0	0	0	0	0	0	0	0	0	0	0	0	0	0	0	0	0	0	0	0	1
OTU_735	Archaea	Euryarchaeota	Thermoplasmata	Marine Group III	uncultured marine archaeon	uncultured marine archaeon	uncultured marine archaeon	0	0	0	0	0	0	0	0	0	1	0	0	0	0	0	0	0	0	0	0	0	0	1
OTU_736	Archaea	Nanoarchaeaeota	Woesearchaeia	uncultured euryarchaeote	uncultured euryarchaeote	uncultured euryarchaeote	uncultured euryarchaeote	0	0	0	0	0	0	0	0	0	0	0	0	0	1	0	0	0	0	0	0	0	0	1
OTU_737	Archaea	Nanoarchaeaeota	Woesearchaeia	uncultured archaeon	uncultured archaeon	uncultured archaeon	uncultured archaeon	0	0	0	0	0	0	0	0	0	0	0	0	0	1	0	0	0	0	0	0	0	0	1
OTU_740	Archaea	Thaumarchaeota	Marine Benthic Group A	uncultured marine crenarchaeote AD1000-325-A12	uncultured marine crenarchaeote AD1000-325-A12	uncultured marine crenarchaeote AD1000-325-A12	uncultured marine crenarchaeote AD1000-325-A12	0	0	0	0	0	0	0	0	0	0	0	0	0	0	1	0	0	0	0	0	0	0	1
OTU_741	Archaea	Thaumarchaeota	Nitrososphaeria	Nitrosopumilales	Nitrosopumilaceae	marine metagenome	marine metagenome	0	0	0	0	0	0	0	0	0	0	0	0	0	0	1	0	0	0	0	0	0	0	1
OTU_743	Archaea	Thaumarchaeota	Nitrososphaeria	Nitrosopumilales	Nitrosopumilaceae	Unclassified	Unclassified	0	0	0	0	0	0	0	0	0	0	0	0	0	0	1	0	0	0	0	0	0	0	1
OTU_744	Archaea	Thaumarchaeota	Nitrososphaeria	Nitrosopumilales	Nitrosopumilaceae	Unclassified	Unclassified	0	0	0	0	1	0	0	0	0	0	0	0	0	0	0	0	0	0	0	0	0	0	1
OTU_756	Archaea	Euryarchaeota	Thermoplasmata	Marine Group II	uncultured archaeon 'KTK 31A'	uncultured archaeon 'KTK 31A'	uncultured archaeon 'KTK 31A'	0	0	0	0	0	0	0	1	0	0	0	0	0	0	0	0	0	0	0	0	0	0	1
OTU_758	Archaea	Euryarchaeota	Thermoplasmata	Marine Group II	Marine group II euryarchaeote REDSEA-S03_B6	Marine group II euryarchaeote REDSEA-S03_B6	Marine group II euryarchaeote REDSEA-S03_B6	0	0	0	0	0	0	1	0	0	0	0	0	0	0	0	0	0	0	0	0	0	0	1
OTU_760	Archaea	Euryarchaeota	Thermoplasmata	Marine Group III	uncultured archaeon	uncultured archaeon	uncultured archaeon	0	0	0	0	0	0	1	0	0	0	0	0	0	0	0	0	0	0	0	0	0	0	1
OTU_772	Archaea	Thaumarchaeota	Nitrososphaeria	Nitrosopumilales	Nitrosopumilaceae	Unclassified	Unclassified	0	0	0	0	0	0	0	0	0	0	1	0	0	0	0	0	0	0	0	0	0	0	1
OTU_777	Archaea	Thaumarchaeota	Nitrososphaeria	Nitrosopumilales	Nitrosopumilaceae	Unclassified	Unclassified	0	0	0	0	0	0	0	0	0	0	0	0	0	0	0	1	0	0	0	0	0	0	1
OTU_779	Archaea	Thaumarchaeota	Nitrososphaeria	Nitrosopumilales	Nitrosopumilaceae	marine metagenome	marine metagenome	0	0	0	0	0	1	0	0	0	0	0	0	0	0	0	0	0	0	0	0	0	0	1
OTU_789	Archaea	Thaumarchaeota	Nitrososphaeria	Nitrosopumilales	Nitrosopumilaceae	Unclassified	Unclassified	0	0	0	0	0	0	0	0	0	0	0	1	0	0	0	0	0	0	0	0	0	0	1
OTU_792	Archaea	Euryarchaeota	Thermoplasmata	Marine Group III	Unclassified	Unclassified	Unclassified	1	0	0	0	0	0	0	0	0	0	0	0	0	0	0	0	0	0	0	0	0	0	1
OTU_793	Archaea	Euryarchaeota	Thermoplasmata	Marine Group II	marine metagenome	marine metagenome	marine metagenome	1	0	0	0	0	0	0	0	0	0	0	0	0	0	0	0	0	0	0	0	0	0	1
OTU_794	Archaea	Euryarchaeota	Thermoplasmata	Marine Group II	uncultured marine group II/III euryarchaeote AD1000_31_C10	uncultured marine group II/III euryarchaeote AD1000_31_C10	uncultured marine group II/III euryarchaeote AD1000_31_C10	0	1	0	0	0	0	0	0	0	0	0	0	0	0	0	0	0	0	0	0	0	0	1
OTU_796	Archaea	Thaumarchaeota	Nitrososphaeria	Nitrosopumilales	Nitrosopumilaceae	uncultured marine archaeon	uncultured marine archaeon	0	0	0	0	0	0	0	0	0	0	0	0	0	0	0	0	1	0	0	0	0	0	1
OTU_799	Archaea	Thaumarchaeota	Nitrososphaeria	Nitrosopumilales	Nitrosopumilaceae	Unclassified	Unclassified	0	0	0	0	0	0	0	0	0	0	0	0	0	0	0	0	1	0	0	0	0	0	1
OTU_800	Archaea	Thaumarchaeota	Nitrososphaeria	Nitrosopumilales	Nitrosopumilaceae	Candidatus Nitrosopumilus	uncultured marine group I thaumarchaeote	0	1	0	0	0	0	0	0	0	0	0	0	0	0	0	0	0	0	0	0	0	0	1
OTU_801	Archaea	Thaumarchaeota	Nitrososphaeria	Nitrosopumilales	Nitrosopumilaceae	Candidatus Nitrosopumilus	uncultured marine group I thaumarchaeote	0	0	0	0	0	0	0	0	0	0	0	0	0	0	0	0	0	0	0	0	1	0	1
OTU_802	Archaea	Nanoarchaeaeota	Woesearchaeia	Unclassified	Unclassified	Unclassified	Unclassified	0	0	0	0	0	0	0	0	0	0	0	0	0	0	0	0	0	0	1	0	0	0	1
OTU_806	Archaea	Euryarchaeota	Thermoplasmata	Marine Group II	Unclassified	Unclassified	Unclassified	0	0	0	0	0	0	0	0	0	0	0	0	0	0	0	0	0	1	0	0	0	0	1
OTU_808	Archaea	Euryarchaeota	Thermoplasmata	Marine Group II	Unclassified	Unclassified	Unclassified	1	0	0	0	0	0	0	0	0	0	0	0	0	0	0	0	0	0	0	0	0	0	1
OTU_810	Archaea	Unclassified	Unclassified	Unclassified	Unclassified	Unclassified	Unclassified	0	0	0	0	0	0	0	0	0	0	0	0	0	0	0	0	0	0	1	0	0	0	1
OTU_814	Archaea	Nanoarchaeaeota	Woesearchaeia	Unclassified	Unclassified	Unclassified	Unclassified	0	0	0	0	1	0	0	0	0	0	0	0	0	0	0	0	0	0	0	0	0	0	1
OTU_817	Archaea	Thaumarchaeota	Nitrososphaeria	Nitrosopumilales	Nitrosopumilaceae	uncultured thaumarchaeote	uncultured thaumarchaeote	0	1	0	0	0	0	0	0	0	0	0	0	0	0	0	0	0	0	0	0	0	0	1
OTU_820	Archaea	Nanoarchaeaeota	Woesearchaeia	Unclassified	Unclassified	Unclassified	Unclassified	0	0	0	0	0	1	0	0	0	0	0	0	0	0	0	0	0	0	0	0	0	0	1
OTU_826	Archaea	Thaumarchaeota	Nitrososphaeria	Nitrosopumilales	Nitrosopumilaceae	marine metagenome	marine metagenome	0	0	0	0	0	0	0	0	0	0	0	0	0	0	1	0	0	0	0	0	0	0	1
OTU_828	Archaea	Euryarchaeota	Thermoplasmata	Marine Group II	Unclassified	Unclassified	Unclassified	0	0	0	0	1	0	0	0	0	0	0	0	0	0	0	0	0	0	0	0	0	0	1
OTU_830	Archaea	Nanoarchaeaeota	Woesearchaeia	uncultured crenarchaeote	uncultured crenarchaeote	uncultured crenarchaeote	uncultured crenarchaeote	0	0	0	0	0	0	0	0	0	0	0	0	0	1	0	0	0	0	0	0	0	0	1
OTU_834	Archaea	Thaumarchaeota	Marine Benthic Group A	uncultured marine archaeon	uncultured marine archaeon	uncultured marine archaeon	uncultured marine archaeon	0	0	0	0	0	0	0	0	0	0	0	0	0	0	0	0	0	1	0	0	0	0	1
OTU_835	Archaea	Thaumarchaeota	Nitrososphaeria	Nitrosopumilales	Nitrosopumilaceae	Unclassified	Unclassified	0	0	0	0	0	0	0	0	0	0	0	0	0	0	0	0	0	0	0	1	0	0	1
OTU_836	Archaea	Thaumarchaeota	Nitrososphaeria	Nitrosopumilales	Nitrosopumilaceae	Unclassified	Unclassified	0	0	0	0	0	0	0	0	0	0	0	0	0	0	0	0	0	0	0	1	0	0	1
OTU_839	Archaea	Euryarchaeota	Thermoplasmata	Marine Group III	Marine Group III euryarchaeote SCGC AAA288-E19	Marine Group III euryarchaeote SCGC AAA288-E19	Marine Group III euryarchaeote SCGC AAA288-E19	0	0	1	0	0	0	0	0	0	0	0	0	0	0	0	0	0	0	0	0	0	0	1
OTU_840	Archaea	Euryarchaeota	Thermoplasmata	Marine Group II	Unclassified	Unclassified	Unclassified	0	0	0	0	0	0	0	0	0	1	0	0	0	0	0	0	0	0	0	0	0	0	1
OTU_841	Archaea	Thaumarchaeota	Nitrososphaeria	Nitrosopumilales	Nitrosopumilaceae	Unclassified	Unclassified	0	0	1	0	0	0	0	0	0	0	0	0	0	0	0	0	0	0	0	0	0	0	1
OTU_844	Archaea	Euryarchaeota	Thermoplasmata	Marine Group II	metagenome	metagenome	metagenome	0	0	0	0	0	0	0	1	0	0	0	0	0	0	0	0	0	0	0	0	0	0	1
OTU_845	Archaea	Nanoarchaeaeota	Woesearchaeia	uncultured euryarchaeote	uncultured euryarchaeote	uncultured euryarchaeote	uncultured euryarchaeote	0	0	0	0	0	0	0	0	0	0	0	1	0	0	0	0	0	0	0	0	0	0	1
OTU_847	Archaea	Euryarchaeota	Thermoplasmata	Marine Group II	Unclassified	Unclassified	Unclassified	0	0	0	0	0	0	0	1	0	0	0	0	0	0	0	0	0	0	0	0	0	0	1
OTU_848	Archaea	Thaumarchaeota	Marine Benthic Group A	uncultured crenarchaeote	uncultured crenarchaeote	uncultured crenarchaeote	uncultured crenarchaeote	0	0	0	0	0	0	0	0	0	0	0	0	0	0	0	1	0	0	0	0	0	0	1
OTU_850	Archaea	Thaumarchaeota	Nitrososphaeria	Nitrosopumilales	Nitrosopumilaceae	Candidatus Nitrosopelagicus	marine metagenome	0	0	0	0	0	0	0	0	1	0	0	0	0	0	0	0	0	0	0	0	0	0	1
OTU_852	Archaea	Thaumarchaeota	Nitrososphaeria	Nitrosopumilales	Nitrosopumilaceae	Unclassified	Unclassified	0	0	0	0	1	0	0	0	0	0	0	0	0	0	0	0	0	0	0	0	0	0	1
OTU_854	Archaea	Euryarchaeota	Thermoplasmata	Marine Group II	Marine group II euryarchaeote REDSEA-S03_B6	Marine group II euryarchaeote REDSEA-S03_B6	Marine group II euryarchaeote REDSEA-S03_B6	0	0	0	0	0	0	1	0	0	0	0	0	0	0	0	0	0	0	0	0	0	0	1
OTU_855	Archaea	Nanoarchaeaeota	Woesearchaeia	Unclassified	Unclassified	Unclassified	Unclassified	0	0	0	0	1	0	0	0	0	0	0	0	0	0	0	0	0	0	0	0	0	0	1
OTU_856	Archaea	Thaumarchaeota	Nitrososphaeria	Nitrosopumilales	Nitrosopumilaceae	marine metagenome	marine metagenome	0	0	0	0	0	0	0	0	0	0	0	0	0	0	1	0	0	0	0	0	0	0	1
OTU_858	Archaea	Thaumarchaeota	Nitrososphaeria	Nitrosopumilales	Nitrosopumilaceae	Candidatus Nitrosopelagicus	marine metagenome	0	0	0	0	0	0	0	0	0	0	0	0	0	0	0	0	0	0	1	0	0	0	1
OTU_859	Archaea	Nanoarchaeaeota	Woesearchaeia	uncultured archaeon	uncultured archaeon	uncultured archaeon	uncultured archaeon	0	0	0	0	0	0	0	0	0	0	0	0	0	0	0	0	0	0	0	0	0	1	1
OTU_860	Archaea	Euryarchaeota	Thermoplasmata	Marine Group II	Unclassified	Unclassified	Unclassified	1	0	0	0	0	0	0	0	0	0	0	0	0	0	0	0	0	0	0	0	0	0	1
OTU_864	Archaea	Nanoarchaeaeota	Woesearchaeia	uncultured euryarchaeote	uncultured euryarchaeote	uncultured euryarchaeote	uncultured euryarchaeote	0	1	0	0	0	0	0	0	0	0	0	0	0	0	0	0	0	0	0	0	0	0	1
OTU_865	Archaea	Euryarchaeota	Thermoplasmata	Marine Group II	uncultured marine group II/III euryarchaeote AD1000_31_C10	uncultured marine group II/III euryarchaeote AD1000_31_C10	uncultured marine group II/III euryarchaeote AD1000_31_C10	0	0	0	0	0	0	0	0	0	0	0	0	0	0	0	0	0	0	0	0	1	0	1
OTU_873	Archaea	Thaumarchaeota	Nitrososphaeria	Nitrosopumilales	Nitrosopumilaceae	marine metagenome	marine metagenome	0	0	0	1	0	0	0	0	0	0	0	0	0	0	0	0	0	0	0	0	0	0	1
OTU_874	Archaea	Thaumarchaeota	Nitrososphaeria	Nitrosopumilales	Nitrosopumilaceae	Candidatus Nitrosopelagicus	marine metagenome	0	0	0	0	0	0	0	0	0	0	0	0	0	0	0	0	0	0	1	0	0	0	1
OTU_883	Archaea	Euryarchaeota	Thermoplasmata	Marine Group II	Unclassified	Unclassified	Unclassified	0	0	0	0	0	0	0	0	1	0	0	0	0	0	0	0	0	0	0	0	0	0	1
OTU_886	Archaea	Euryarchaeota	Thermoplasmata	Marine Group II	Marine group II euryarchaeote REDSEA-S03_B6	Marine group II euryarchaeote REDSEA-S03_B6	Marine group II euryarchaeote REDSEA-S03_B6	1	0	0	0	0	0	0	0	0	0	0	0	0	0	0	0	0	0	0	0	0	0	1
OTU_887	Archaea	Thaumarchaeota	Nitrososphaeria	Nitrosopumilales	Nitrosopumilaceae	Unclassified	Unclassified	0	0	0	0	0	0	0	0	0	0	0	0	0	0	1	0	0	0	0	0	0	0	1
OTU_889	Archaea	Euryarchaeota	Thermoplasmata	Marine Group III	uncultured marine archaeon	uncultured marine archaeon	uncultured marine archaeon	0	0	0	0	0	0	0	0	0	1	0	0	0	0	0	0	0	0	0	0	0	0	1
OTU_891	Archaea	Euryarchaeota	Thermoplasmata	Marine Group II	Unclassified	Unclassified	Unclassified	1	0	0	0	0	0	0	0	0	0	0	0	0	0	0	0	0	0	0	0	0	0	1
OTU_892	Archaea	Euryarchaeota	Thermoplasmata	Marine Group III	uncultured marine archaeon	uncultured marine archaeon	uncultured marine archaeon	0	0	0	0	0	0	0	1	0	0	0	0	0	0	0	0	0	0	0	0	0	0	1
OTU_903	Archaea	Nanoarchaeaeota	Woesearchaeia	marine metagenome	marine metagenome	marine metagenome	marine metagenome	0	0	0	0	0	0	0	0	0	0	0	0	1	0	0	0	0	0	0	0	0	0	1
OTU_904	Archaea	Nanoarchaeaeota	Woesearchaeia	uncultured euryarchaeote	uncultured euryarchaeote	uncultured euryarchaeote	uncultured euryarchaeote	0	0	0	0	0	0	0	0	0	0	0	0	0	0	0	0	0	0	1	0	0	0	1
OTU_907	Archaea	Euryarchaeota	Thermoplasmata	Marine Group II	uncultured marine group II euryarchaeote HF130_40G09	uncultured marine group II euryarchaeote HF130_40G09	uncultured marine group II euryarchaeote HF130_40G09	0	0	0	0	0	0	0	1	0	0	0	0	0	0	0	0	0	0	0	0	0	0	1
OTU_910	Archaea	Euryarchaeota	Thermoplasmata	Marine Group II	Unclassified	Unclassified	Unclassified	0	0	0	0	0	0	0	0	0	0	0	0	0	0	0	0	0	0	0	1	0	0	1
OTU_916	Archaea	Euryarchaeota	Thermoplasmata	Marine Group II	seawater metagenome	seawater metagenome	seawater metagenome	0	0	0	0	0	0	0	0	0	0	0	0	0	0	0	0	0	1	0	0	0	0	1
OTU_918	Archaea	Nanoarchaeaeota	Woesearchaeia	marine metagenome	marine metagenome	marine metagenome	marine metagenome	0	0	0	0	0	0	0	0	0	0	0	0	0	0	0	0	0	0	0	1	0	0	1
OTU_920	Archaea	Euryarchaeota	Thermoplasmata	Marine Group II	Unclassified	Unclassified	Unclassified	0	0	0	0	0	0	0	0	0	0	0	0	0	1	0	0	0	0	0	0	0	0	1
OTU_925	Archaea	Thaumarchaeota	Nitrososphaeria	Nitrosopumilales	Nitrosopumilaceae	Candidatus Nitrosopumilus	Unclassified	0	0	0	0	0	0	0	0	0	0	0	0	0	1	0	0	0	0	0	0	0	0	1
OTU_927	Archaea	Unclassified	Unclassified	Unclassified	Unclassified	Unclassified	Unclassified	0	0	0	0	0	0	0	0	0	0	0	0	0	0	1	0	0	0	0	0	0	0	1
OTU_929	Archaea	Thaumarchaeota	Nitrososphaeria	Nitrosopumilales	Nitrosopumilaceae	marine metagenome	marine metagenome	0	0	0	0	0	0	0	0	0	0	0	0	0	0	1	0	0	0	0	0	0	0	1
OTU_933	Archaea	Thaumarchaeota	Nitrososphaeria	Nitrosopumilales	Nitrosopumilaceae	uncultured thaumarchaeote	uncultured thaumarchaeote	0	0	0	0	0	0	0	0	0	0	0	0	0	0	0	0	1	0	0	0	0	0	1
OTU_935	Archaea	Thaumarchaeota	Nitrososphaeria	Nitrosopumilales	Nitrosopumilaceae	marine metagenome	marine metagenome	0	0	0	0	0	0	0	0	0	0	0	0	0	0	0	0	0	0	0	1	0	0	1
OTU_939	Archaea	Euryarchaeota	Thermoplasmata	Marine Group III	Unclassified	Unclassified	Unclassified	1	0	0	0	0	0	0	0	0	0	0	0	0	0	0	0	0	0	0	0	0	0	1
OTU_940	Archaea	Nanoarchaeaeota	Woesearchaeia	uncultured archaeon	uncultured archaeon	uncultured archaeon	uncultured archaeon	0	0	0	0	0	0	0	0	0	0	0	0	0	1	0	0	0	0	0	0	0	0	1
OTU_943	Archaea	Thaumarchaeota	Nitrososphaeria	Nitrosopumilales	Nitrosopumilaceae	uncultured marine archaeon	uncultured marine archaeon	0	0	0	0	0	0	0	0	0	0	0	0	0	0	0	0	0	0	0	0	1	0	1
OTU_944	Archaea	Euryarchaeota	Thermoplasmata	Marine Group III	uncultured marine archaeon	uncultured marine archaeon	uncultured marine archaeon	0	0	0	0	0	0	0	0	0	0	0	0	0	0	0	0	0	0	0	0	1	0	1
OTU_945	Archaea	Nanoarchaeaeota	Woesearchaeia	uncultured euryarchaeote	uncultured euryarchaeote	uncultured euryarchaeote	uncultured euryarchaeote	0	0	0	0	0	1	0	0	0	0	0	0	0	0	0	0	0	0	0	0	0	0	1
OTU_950	Archaea	Euryarchaeota	Thermoplasmata	Marine Group II	uncultured marine group II/III euryarchaeote KM3_53_G07	uncultured marine group II/III euryarchaeote KM3_53_G07	uncultured marine group II/III euryarchaeote KM3_53_G07	0	0	0	0	0	0	0	0	1	0	0	0	0	0	0	0	0	0	0	0	0	0	1
OTU_957	Archaea	Thaumarchaeota	Nitrososphaeria	Nitrosopumilales	Nitrosopumilaceae	uncultured archaeon	uncultured archaeon	0	0	0	0	1	0	0	0	0	0	0	0	0	0	0	0	0	0	0	0	0	0	1
OTU_959	Archaea	Thaumarchaeota	Nitrososphaeria	Nitrosopumilales	Nitrosopumilaceae	Candidatus Nitrosopelagicus	marine metagenome	0	0	0	0	0	0	0	0	1	0	0	0	0	0	0	0	0	0	0	0	0	0	1
OTU_963	Archaea	Thaumarchaeota	Nitrososphaeria	Nitrosopumilales	Nitrosopumilaceae	Unclassified	Unclassified	0	0	0	0	0	0	0	1	0	0	0	0	0	0	0	0	0	0	0	0	0	0	1
OTU_972	Archaea	Euryarchaeota	Thermoplasmata	Marine Group III	uncultured marine archaeon	uncultured marine archaeon	uncultured marine archaeon	0	0	1	0	0	0	0	0	0	0	0	0	0	0	0	0	0	0	0	0	0	0	1
OTU_978	Archaea	Thaumarchaeota	Nitrososphaeria	Nitrosopumilales	Nitrosopumilaceae	Unclassified	Unclassified	0	0	0	0	0	0	0	0	0	0	0	0	0	0	0	0	1	0	0	0	0	0	1
OTU_981	Archaea	Thaumarchaeota	Nitrososphaeria	Nitrosopumilales	Nitrosopumilaceae	Unclassified	Unclassified	0	0	0	0	0	0	0	0	0	0	0	0	0	0	0	0	0	0	0	0	0	1	1
OTU_982	Archaea	Euryarchaeota	Thermoplasmata	Marine Group II	metagenome	metagenome	metagenome	1	0	0	0	0	0	0	0	0	0	0	0	0	0	0	0	0	0	0	0	0	0	1
OTU_986	Archaea	Thaumarchaeota	Nitrososphaeria	Nitrosopumilales	Nitrosopumilaceae	Unclassified	Unclassified	0	1	0	0	0	0	0	0	0	0	0	0	0	0	0	0	0	0	0	0	0	0	1
OTU_987	Archaea	Thaumarchaeota	Nitrososphaeria	Nitrosopumilales	Nitrosopumilaceae	Unclassified	Unclassified	0	0	0	1	0	0	0	0	0	0	0	0	0	0	0	0	0	0	0	0	0	0	1
OTU_989	Archaea	Thaumarchaeota	Nitrososphaeria	Nitrosopumilales	Nitrosopumilaceae	Unclassified	Unclassified	0	0	0	0	0	0	0	0	0	0	0	0	0	0	0	0	1	0	0	0	0	0	1
OTU_991	Archaea	Nanoarchaeaeota	Woesearchaeia	Unclassified	Unclassified	Unclassified	Unclassified	0	0	0	0	0	0	0	0	0	0	0	0	1	0	0	0	0	0	0	0	0	0	1
OTU_995	Archaea	Thaumarchaeota	Nitrososphaeria	Nitrosopumilales	Nitrosopumilaceae	Candidatus Nitrosopelagicus	marine metagenome	0	0	0	0	0	0	0	0	0	0	0	0	0	0	0	1	0	0	0	0	0	0	1
OTU_997	Archaea	Euryarchaeota	Thermoplasmata	Marine Group II	uncultured marine group II/III euryarchaeote AD1000_09_E08	uncultured marine group II/III euryarchaeote AD1000_09_E08	uncultured marine group II/III euryarchaeote AD1000_09_E08	1	0	0	0	0	0	0	0	0	0	0	0	0	0	0	0	0	0	0	0	0	0	1
