# Supplementary material for: Characterization of particle-associated and free-living bacterial and archaeal communities along the water columns of the South China Sea
Source: Copernicus journal article supplement (doi:10.5194/bg-18-113-2021), 2021-01-08
Supplement: Supplementary file 2 [file bg-18-113-2021-supplement.zip › 03 Supplementary_Table S3.xlsx]

## Sheet: Sheet1
	Bacteria (Jaccard distance)
	MRPP	ANOSIM		PERMANOVA
Multiple comparison	P	P	R	P
Group 1 & 2	0.001	0.001	0.4319	0.001
Group 1 & 3	0.003	0.004	0.678	0.003
Group 2 & 3	0.001	0.002	1	0.005
Group 1: G3(P200, P1000, P2000, P3000, P4000, F2000), J5(P200, P1000, P2000, P3000, P4000); Group 2: G3(F200, F1000, F3000, F4000), J5(F200, F1000, F2000, F3000, F4000); Group 3: G3(F50, P50), J5(F50, P50).
	Archaea (Jaccard distance)
	MRPP	ANOSIM		PERMANOVA
Multiple comparison	P	P	R	P
Group 1 & 2	0.002	0.003	0.8882	0.002
Group 1 & 3	0.003	0.001	0.8161	0.004
Group 2 & 3	0.007	0.003	0.3448	0.008
Group 1: G3(F50, P50), J5(F50, P50); Group 2: G3(F200, F1000, F2000, F3000, F4000), J5(F200, F1000, F2000, F3000, F4000); Group 3: G3(P200, P1000, P2000, P4000), J5(P200, P1000, P2000, P3000).
Mantel test (Jaccard distance)
	Bacteria		Archaea
Environmental factors	R	P	R	P
Depth	0.2391	0.007	0.2565	0.007
Temperature	0.5484	0.001	0.6198	0.001
Salinity	0.5045	0.002	0.6245	0.001
POC	-0.02	0.543	0.117	0.129
Age of DIC	0.4257	0.001	0.4521	0.001
